# Supplementary material for: Ecogenomics sheds light on diverse lifestyle strategies in freshwater CPR
Source: Microbiome. 2022 Jun 4;10:84. doi: 10.1186/s40168-022-01274-3 (PMC9166423; doi:10.1186/s40168-022-01274-3)
Supplement: Supplementary file 4 — Additional file 3: Supplementary Table 1. Sampling details for the analysed metagenomes. Supplementary Table 2. Completeness of MAGs calculated based on 43 SCGs (Anantharaman, Brown, Hug, et al. 2016). Supplementary Table 3. Basic statistics and taxonomy (GTDB, NCBI) for the MAGs assembled in this study. Supplementary Table 4. List of final, dereplicated bins and the ones of lower quatily that were collapsed into them. Supplementary Table 5. Annotation results of CPRs at class level. KEGG modules were manually checked for completeness after annotationg the bins using different databases (Panda, TIGR, COG, Interproscan and Pfam). Supplementary Table 6. Recruitment results (coverage per Gbp) for all bins versus all samples analyzed in this study. Supplementary Table 7. Basic statistics for Refseq 81 database, representative CPR genomes from GTDB r89 and the MAGs assembled in this study. Supplementary Table 8. Basic statistics for the manually curated SPC database used in this study. Supplementary Table 9. Basic statistics for the manually curated free-living bacteria database used in this study. Supplementary Table 10. Basic statistics for the representative CPRs genomes in GTDB versions r89 database. Supplementary Table 11. List of CPR FISH probes (their sequence, specificity and target group) and cells measurements and statistics. Supplementary Table 12. Average nucleotide identity (ANI) values computed between all pairs of freshwater CPR MAGs obtained in this study. Supplementary Table 13. GRiD results for the dereplicated bins, estimating the rate of genome replication. Supplementary Table 14. Phage defense systems and their occurencess in CPRs, SPCs and free-living bacteria. Supplementary Table 15. Predicted rhodopsins in CPRs, including all GTDB representative genomes and the282 MAGs obtained in this study. Supplementary Table S16. CAZys and their occurence in freshwater CPR genomes. [file 40168_2022_1274_MOESM3_ESM.xlsx]

## Sheet: Index
Index of Supplementary Tables
S1	Sampling sites
S2	Genome completeness estimation for freshwater CPRs using the 43 SCG
S3	Freshwater CPR MAGs - basic statistics
S4	Dereplication results - dRep, default parameters
S5	Set of complete pathways, manually checked for COG, TIGR, PANDA, Interproscan and Pfam annotations
S6	Recruitment values in coverage per Gb - all MAGs agains all metagenomes
S7	Master table containing all statistics for the RefSeq81 datatbase, all GTDB representatives for CPRs, all freshwater CPRs
S8	All genomic statistics for parasitic/symbiotic microbes from RefSeq81
S9	All genomic statistics for free-living microbes from RefSeq81
S10	All genomic statistics for GTDB CPRs
S11	FISH probes for CPRs and cell measurements
S12	ANI values for freshwater CPRs
S13	GRiD values for freshwater CPRs
S14	Phage defense systems in CPRs, free-living streamlined bacteria and parasites/symbionts
S15	Predicted rhodopsins in all GTDB representative
S16	CAZys and their occurence in freshwater CPR genomes

## Sheet: Table_S1
Back to index
Supplementary Table 1. Sampling details for the analysed metagenomes.
Lake	Sample name	Sampling date	Water layer	Coordinates	Country	Depth (m)	Trophic status	Biogeographic region	CPR Bins (before dereplication)	Dereplicated CPR bins	References	Accession number (ENA / SRA)
Attersee	AE-03may19	2019-03-05	Epilimnion	47°52′ N 13°32′ E	Austria	5	oligotrophic	subalpine*	2	1		ERS4065074
	AE-24oct19	24/10/2019							6	3		ERS6344540
	AH-03may19	2019-03-05	Hypolimnion			150			0	0		ERS4065075
	AH-24oct19	24/10/2019							6	3		ERS6344541
Biwa	LBG_julE	20/7/2016	Epilimnion	35°23' N 136°08' E	Japan	5	mesotrophic	continental	0	0	Okazaki et al. 2020, Mehrshad et al. 2018	DRX117924
	LBG_augE	18/8/2016							0	0		DRX117925
	LBG_sepE	27/9/2016							1	1		DRX117926
	LBG_sepH	13/8/2016	Hypolimnion			65			0	0		DRX117927
	LBG_octH	2016-11-10							0	0		DRX117928
	LBG_novH	17/11/2016							0	0		DRX117929
	LBG_decH	2016-12-12							1	1		DRX117930
Baikal	Baikal-1250m	29/03/2018	Hypolimnion	51°50′ N 104°47′E	Russia	1250	ultra-oligotrophic	continental*	39	28	Cabello-Yeves et al., 2019	SRX8581913
	Baikal-1350m					1350						SRX8581914
	Baikal-20m		Epilimnion			20			0	0		SRX8581912
	Baikal-5m					5						SRX8581911
Constance	CE-Jul18	2018-03-07	Epilimnion	47°38′ N 9°22 E	Switzerland/Germany/Austria	5	mesotrophic	subalpine*	0	0	Mukherjee et al. 2020	ERS4409418
	CE-Oct18	2018-09-10							0	0		ERS4409419
	CH-Jul18	2018-03-07	Hypolimnion			200			5	1		ERS4409420
	CH-Oct18	2018-09-10							8	8		ERS4409421
Greifensee	GE-03apr19	2019-03-04	Epylimnion	47°22’ N 8°42’ E	Switzerland	5	eutrophic	subalpine*	0	0		ERS4065066
	GE-07nov19	2019-07-11							0	0		ERS6344542
	GH-07nov19	2019-07-11	Hypolimnion			20			1	1		ERS6344543
Ikeda	Ike-5	25/11/2017	Epilimnion	31°14' N 130°34' E	Japan	5	mesotrophic	subtropical	0	0		ERS6344562
	Ike-50		Hypolimnion			50			3	3		ERS6344563
	Ike-100					100			10	10		ERS6344564
	Ike-150					150			4	4		ERS6344565
	Ike-200					200			5	5		ERS6344566
Jiřická	Jr-11may16	2016-11-05	Surface	48°36' N 14°40' E	Czechia	1	dystrophic	continental*	0	0	Kavagutti et al. 2019	ERS4146252
	Jr-25may17	25/5/2017							0	0	Kavagutti et al. 2019	ERS4146254
	Jr-28jun17	28/6/2017							0	0	Kavagutti et al. 2019	ERS4146256
	Jr-7aug17	2017-07-08							0	0	Kavagutti et al. 2019	ERS4146258
	Jr-28aug17	28/8/2017							0	0	Kavagutti et al. 2019	ERS4146260
	Jr-19feb18	19/2/2018							2	2		ERS6351407
Lugano	LE-02apr19	2019-02-04	Epilimnion	45°59′ N 8°58′ E	Italy	5	meso-eutrophic	subalpine*	0	0	Mukherjee et al. 2020	ERS4065070
	LE-05nov19	2019-05-11							0	0		ERS6344544
	LH-02apr19	2019-02-04	Hypolimnion			50			3	3		ERS4065071
	LH-05nov19	2019-05-11							1	1		ERS6344545
Maggiore	MaE-04nov19	2019-04-11	Epilimnion	45°58’ N 8°39’ E	Italy	5	oligo-mesotrophic	subalpine*	0	0		ERS6344546
	Mag-171016-5	17/10/2016							0	0		ERS6344567
	MaE-09apr19	2019-09-04							0	0		ERS4065068
	Mag-171016-100	17/10/2016	Hypolimnion			100			1	1		ERS6344568
	Mag-171016-300	17/10/2016				300			3	1		ERS6344569
	MaH-04nov19	2019-04-11							23	16		ERS6344547
	MaH-09apr19	2019-09-04							20	9		ERS4065069
Medard	ME-08apr19	2019-08-04	Epilimnion	50°10′ N 12°35′ E	Czechia	5	oligotrophic	continental*	1	0		ERS4065078
	ME-09jul19	2019-09-07							0	0	Mukherjee et al. 2020	ERS4065084
	ME-21oct19	21/10/2019							0	0		ERS6344548
	MH-08apr19	2019-08-04	Hypolimnion			30			1	0		ERS4065079
	MH-09jul19	2019-09-07							1	0	Mukherjee et al. 2020	ERS4065085
	MH-21oct19	21/10/2019							2	1		ERS6344549
Milada	MiE-16apr19	16/4/2019	Epilimnion	50°38′ N 13°56′ E	Czechia	5	oligotrophic	continental*	2	2		ERS4065080
	MiE-22jul19	22/7/2019							0	0		ERS4065086
	MiE-14oct19	14/10/2019							1	1		ERS6344550
	MiH-16apr19	16/4/2019	Hypolimnion			15			2	0		ERS4065081
	MiH-22jul19	22/7/2019							0	0		ERS4065087
	MiH-14oct19	14/10/2019							3	3		ERS6344551
Mondsee	MoE-02may19	2019-02-05	Epilimnion	47°49’ N 13°22’ E	Austria	5	mesotrophic	subalpine*	0	0		ERS4065072
	MoE-23oct19	23/10/2019							0	0		ERS6344552
	MoH-02may19	2019-02-05	Hypolimnion			40			0	0		ERS4065073
	MoH-23oct19	23/10/2019							2	2		ERS6344553
Most	MsE-30apr19	30/4/2019	Epilimnion	50°31′ N 13°37′ E	Czechia	5	oligotrophic	continental*	1	0		ERS4065082
	MsE-30jul19	30/7/2019							0	0		ERS4065089
	MsE-01oct19	2019-01-10							0	0		ERS6344554
	MsH-30apr19	30/4/2019	Hypolimnion			60			2	2		ERS4065083
	MsH-30jul19	30/7/2019							1	1		ERS4065090
	MsH-01oct19	2019-01-10							6	4		ERS6344555
Řimov	RE-16jun15	16/6/2015	Epilimnion	48°50’ N 14°29’ E	Czechia	0.5	eutrophic	continental*	0	0	Kavagutti et al. 2019	ERS4146214
	RE-4nov15	2015-04-11							2	2	Kavagutti et al. 2019	ERS4146215
	RE-20apr16	20/4/2016							1	0	Mehrshad et al. 2018	ERS4146216
	RE-15aug16	15/8/2016							1	1	Kavagutti et al. 2019	ERS4146218
	RE-9nov16	2016-09-11							0	0	Kavagutti et al. 2019	ERS4146219
	RE-14apr17	14/4/2017							0	0	Kavagutti et al. 2019	ERS4146222
	RE-23may17	23/5/2017							0	0	Kavagutti et al. 2019	ERS4146226
	RE-27jun17	27/6/2017							0	0	Kavagutti et al. 2019	ERS4146240
	RE-26jul17	26/7/2017							0	0	Kavagutti et al. 2019	ERS4146244
	RE-18aug17	18/8/2017							0	0	Kavagutti et al. 2019	ERS4146248
	RH-20apr16	20/4/2016	Hypolimnion			30			4	2	Mehrshad et al. 2018	ERS4146217
	RH-15aug16	15/8/2016							3	1	Kavagutti et al. 2019	ERS4146219
	RH-9nov16	2016-09-11							1	0	Kavagutti et al. 2019	ERS4146221
	RH-14apr17	14/4/2017							1	0	Kavagutti et al. 2019	ERS4146224
	RH-23may17	23/5/2017							11	6	Kavagutti et al. 2019	ERS4146234
	RH-27jun17	27/6/2017							5	1	Kavagutti et al. 2019	ERS4146242
	RH-26jul17	26/7/2017							5	2	Kavagutti et al. 2019	ERS4146246
	RH-18aug17	18/8/2017							4	0	Kavagutti et al. 2019	ERS4146250
Thun	TE-08apr19	2019-08-04	Epilimnion	46°41′ N 7°43′ E	Switzerland	5	ultra-oligotrophic	alpine*	1	1		ERS4065064
	TE-11nov19	2019-11-11							0	0		ERS6344556
	TH-08apr19	2019-08-04	Hypolimnion			180			7	3		ERS4065065
	TH-Jun18	2018-06-11							11	5		ERS4816122
	TH-Oct18	2018-11-05							0	0		ERS6351406
	TH-11nov19	2019-11-11							14	10		ERS6344557
Traunsee	TrE-03may19	2019-03-05	Epilimnion	47°52′ N 13°48′ E	Austria	5	oligotrophic	subalpine*	1	1		ERS4065076
	TrE-25oct19	25/10/2019							0	0		ERS6344558
	TrH-03may19	2019-03-05	Hypolimnion			150			5	1		ERS4065077
	TrH-25oct19	25/10/2019							9	7		ERS6344559
Zurich	ZE-13may13	13/5/2013	Epilimnion	47°18’ N 8°34’ E	Switzerland	5	mesotrophic	subalpine*	0	0	Mehrshad et al. 2018	SRX3565498
	ZE-3nov15	2015-03-11							1	1	Mehrshad et al. 2018	SRX3985715
	ZE-17mar17	17/3/2017							2	1	Mehrshad et al. 2018	SRX3565495
	ZE-Jul18	2018-07-11							0	0	Mukherjee et al. 2020	ERS6351408
	ZE-Oct18	2018-10-17							2	1		ERS4409422
	ZE-03apr19	2019-03-04							1	0		ERS4065062
	ZE05-15May19	15/5/2019							0	0		ERS6351409
	ZE-15May19	15/5/2019							0	0		ERS6351410
	ZE-13nov19	13/11/2019							0	0		ERS6344560
	ZH-13may13	13/5/2013	Hypolimnion			80			3	0	Mehrshad et al. 2018	SRX3565497
	ZH-3nov15	2015-03-11							5	3	Mehrshad et al. 2018	SRX3985716
	ZH-Jul18	2018-07-11				120			6	3		ERS4816123
	ZH-Oct18	2018-10-17							2	1		ERS4409423
	ZH-03apr19	2019-03-04				80			1	0		ERS4065063
	ZH-15May19	15/5/2019							2	1		ERS6351412
	ZH-13nov19	13/11/2019							2	2		ERS6344561
* according to the European Environment Agency

## Sheet: Table_S2
Back to index
Supplementary Table 2. Completeness of MAGs calculated based on 43 SCGs (Anantharaman, Brown, Hug, et al. 2016).
Bin ID	COG Completeness	Histidyl-tRNA synthetase	rpS12	rpS7	rpS9	rpL13	rpS11	rpL19	Leucyl-tRNA synthetase	rpS16	rpL27	rpL17	rpS13	rpS5	rpL16-L10E	rpL24	rpL5	rpS8	rpL22	rpL2	rpL14	rpS3	Phenylalanyl-tRNA	Alanyl-tRNA synthetase	recA	rpL18	rpL21	rpS10	rpS2	rpL20	rpS4	Valyl-tRNA synthetase	Aspartyl tRNA synthetase	rpL15	Preprotein translocase subunit SecY	rpL4	rpL23	rpS17	rpS19	rpS15	rpL11	gyrA	rpL3	rpS20
AE-03may19-196	39.53	1	0	0	1	1	1	1	1	1	1	1	1	0	0	0	0	0	0	0	0	0	1	0	1	0	0	0	1	1	1	0	0	0	0	0	0	0	0	0	1	0	0	1
AE-03may19-31	93.02	1	1	1	1	1	1	1	1	1	1	1	1	1	1	1	1	1	1	1	1	1	1	0	1	1	1	1	1	1	1	1	0	0	1	1	1	1	1	1	1	1	1	1
AH-03may19-109	62.79	0	1	1	0	0	1	0	0	0	1	0	1	1	1	1	1	0	1	1	1	1	0	0	1	1	1	1	0	0	0	1	0	1	1	0	1	1	1	1	1	1	0	1
AH-03may19-119	97.67	1	1	1	1	1	1	1	1	1	1	1	1	1	1	1	1	1	1	1	1	1	1	0	1	1	1	1	1	1	1	1	1	1	1	1	1	1	1	1	1	1	1	1
AH-03may19-31	88.37	1	1	1	0	0	1	1	1	1	1	0	1	1	1	1	1	1	1	1	1	1	1	1	1	1	1	1	0	1	1	1	1	1	1	1	1	1	1	1	1	1	1	0
AH-03may19-46	93.02	1	1	1	1	1	1	1	1	1	1	1	1	1	1	1	1	1	1	1	1	1	1	0	1	1	1	1	1	1	1	1	0	0	1	1	1	1	1	1	1	1	1	1
AH-03may19-69	88.37	1	0	1	1	1	1	0	1	1	1	1	1	1	1	1	1	1	1	1	1	1	1	1	0	1	1	1	1	1	1	1	0	1	1	1	1	0	1	1	1	1	1	1
AH-03may19-8	95.34	1	1	1	1	1	1	1	1	1	1	1	1	1	1	1	1	1	1	1	1	1	1	0	1	1	1	1	1	1	1	1	0	1	1	1	1	1	1	1	1	1	1	1
AH-24oct19-230	93.02	1	0	0	1	1	1	1	1	1	1	1	1	1	1	1	1	1	1	1	1	1	1	1	1	1	1	1	1	1	1	1	0	1	1	1	1	1	1	1	1	1	1	1
AH-24oct19-277	90.69	0	1	1	1	1	1	1	1	1	1	1	1	1	1	1	1	1	1	1	1	1	1	0	1	1	1	1	1	1	1	1	0	0	1	1	1	1	1	1	1	1	1	1
AH-24oct19-282	95.34	1	1	1	1	1	1	1	1	1	1	1	1	1	1	1	1	1	1	1	1	1	1	0	1	1	1	1	1	1	1	1	0	1	1	1	1	1	1	1	1	1	1	1
AH-24oct19-287	55.81	1	0	0	1	1	1	1	1	1	1	1	1	0	0	0	0	0	0	0	0	0	1	1	1	0	1	1	0	1	1	1	1	1	1	0	0	0	0	1	0	1	0	1
AH-24oct19-37	90.69	1	1	1	1	1	1	1	1	0	1	1	1	1	1	1	1	1	1	1	1	1	1	0	1	1	1	1	1	1	1	1	0	1	1	1	1	1	1	1	1	1	1	0
AH-24oct19-52	97.67	1	1	1	1	1	1	1	1	1	1	1	1	1	1	1	1	1	1	1	1	1	1	0	1	1	1	1	1	1	1	1	1	1	1	1	1	1	1	1	1	1	1	1
Baikal-1250m-152	97.67	1	1	1	1	1	1	1	1	1	1	1	1	1	1	1	1	1	1	1	1	1	1	0	1	1	1	1	1	1	1	1	1	1	1	1	1	1	1	1	1	1	1	1
Baikal-1250m-192	95.34	1	1	1	1	1	1	1	1	1	1	1	1	1	1	1	1	1	1	1	1	1	1	0	1	1	1	1	1	1	1	1	0	1	1	1	1	1	1	1	1	1	1	1
Baikal-1250m-222	93.02	1	1	1	1	1	1	1	1	1	1	1	1	1	1	1	1	1	1	1	1	1	1	1	1	1	1	1	1	0	1	1	0	1	1	1	1	1	1	1	1	1	0	1
Baikal-1250m-338	81.39	0	1	1	1	1	1	1	0	1	0	1	1	1	1	1	1	1	1	1	1	1	1	0	0	1	1	1	1	1	1	1	0	0	1	1	1	1	1	1	1	1	1	0
Baikal-1250m-373	93.02	1	1	1	1	1	1	1	1	1	1	1	1	1	1	1	1	1	1	1	1	1	1	0	1	1	1	1	1	1	1	1	0	1	1	1	1	1	1	1	0	1	1	1
Baikal-1250m-46	81.39	1	1	0	1	1	1	0	1	1	1	1	1	1	1	1	1	1	1	1	1	1	1	0	1	1	1	1	1	0	1	0	0	1	1	1	1	1	1	0	1	1	1	0
Baikal-1350m-104	95.34	1	1	1	1	1	1	1	1	1	1	1	1	1	1	1	1	1	1	1	1	1	1	0	1	1	1	1	1	1	1	1	0	1	1	1	1	1	1	1	1	1	1	1
Baikal-1350m-131	79.06	1	1	1	0	1	1	1	1	1	1	1	1	0	1	1	1	1	1	1	1	1	1	0	1	0	0	1	1	1	1	1	0	0	0	1	1	1	1	0	1	1	1	1
Baikal-1350m-133	90.69	0	1	1	1	1	1	1	1	1	1	1	1	1	1	1	1	1	1	1	1	1	1	1	0	1	1	1	0	1	1	1	0	1	1	1	1	1	1	1	1	1	1	1
Baikal-1350m-162	90.69	0	1	1	1	1	1	1	1	1	1	1	1	1	1	1	1	1	1	1	1	1	1	0	1	1	1	1	1	1	1	1	0	0	1	1	1	1	1	1	1	1	1	1
Baikal-1350m-263	76.74	1	0	0	1	1	1	1	1	1	1	1	1	0	1	1	1	0	1	1	1	1	1	0	1	0	1	1	0	1	1	1	0	0	0	1	1	1	1	1	1	1	1	1
Baikal-1350m-280	95.34	1	1	1	1	1	1	1	1	1	1	1	1	1	1	1	1	1	1	1	1	1	1	0	1	1	1	1	0	1	1	1	1	1	1	1	1	1	1	1	1	1	1	1
Baikal-1350m-319	88.37	1	1	1	1	1	1	1	0	1	1	1	1	1	1	1	1	1	1	1	1	1	1	0	0	1	1	1	1	1	1	1	0	1	1	1	1	1	1	1	0	1	1	1
Baikal-1350m-357	90.69	1	1	1	1	1	1	1	1	1	1	1	1	1	1	1	1	1	1	1	1	1	1	1	1	1	1	1	1	1	1	1	0	1	1	1	1	1	1	0	1	0	1	0
Baikal-1350m-369	67.44	1	0	0	0	0	1	0	1	1	1	0	1	1	1	1	1	1	1	0	1	1	1	0	1	1	0	0	1	1	1	1	0	1	1	0	0	1	1	1	1	1	0	1
Baikal-1350m-53	95.34	1	1	1	1	1	1	1	1	1	1	1	1	1	1	1	1	1	1	1	1	1	1	0	1	1	1	1	1	1	1	1	0	1	1	1	1	1	1	1	1	1	1	1
Baikal-deep-G183	97.67	1	1	1	1	1	1	1	1	1	1	1	1	1	1	1	1	1	1	1	1	1	1	0	1	1	1	1	1	1	1	1	1	1	1	1	1	1	1	1	1	1	1	1
Baikal-deep-G184	86.04	1	1	1	1	1	1	1	1	1	1	1	1	1	1	1	1	1	1	1	1	1	0	0	1	1	1	1	0	1	1	0	0	1	1	1	1	1	1	0	1	1	1	1
Baikal-deep-G185	76.74	1	1	1	1	1	1	0	1	1	1	1	1	1	1	1	1	1	1	0	1	1	0	1	1	1	1	1	1	0	1	1	0	1	1	0	0	1	1	0	1	0	0	1
Baikal-deep-G186	51.16	1	0	0	1	1	1	1	1	1	0	1	1	1	0	0	0	1	0	0	0	0	1	0	1	1	0	0	1	1	1	1	0	0	1	0	0	0	0	0	1	1	0	1
Baikal-deep-G188	86.04	1	1	1	1	1	1	1	1	1	1	1	1	1	1	1	1	1	1	1	1	1	0	0	1	1	1	1	0	1	1	1	0	1	1	1	1	1	1	0	1	0	1	1
Baikal-deep-G189	65.11	1	1	1	1	1	1	1	1	1	1	1	1	1	0	0	0	1	0	0	0	0	1	0	0	1	1	0	1	1	1	1	1	1	1	0	0	0	0	1	1	1	0	1
Baikal-deep-G190	88.37	1	1	1	1	1	1	1	1	1	1	1	1	1	1	1	1	1	1	1	1	1	1	0	0	1	0	1	1	1	1	1	0	1	1	1	1	1	1	1	1	0	1	1
Baikal-deep-G191	76.74	1	0	0	1	1	1	0	0	1	1	1	1	1	1	1	1	1	1	1	1	1	0	0	1	1	1	1	1	0	1	1	0	1	1	1	1	1	1	0	1	1	1	0
Baikal-deep-G192	83.72	1	1	1	1	1	1	1	1	0	1	1	1	1	1	1	1	1	1	1	1	1	1	0	0	1	1	0	1	0	1	1	0	1	1	1	1	1	1	1	1	1	1	0
Baikal-deep-G193	74.41	1	1	1	1	1	1	1	0	0	1	1	1	1	1	1	1	1	1	0	1	1	0	0	1	1	1	0	0	1	1	1	1	1	1	0	0	1	1	0	1	1	0	1
Baikal-deep-G194	88.37	1	1	1	1	1	1	1	1	1	0	1	1	1	1	1	1	1	1	1	1	1	0	0	1	1	1	1	1	0	1	1	1	1	1	1	1	1	1	0	1	1	1	1
Baikal-deep-G195	62.79	1	0	0	0	0	1	1	1	1	1	0	1	0	1	1	1	0	1	1	1	1	0	0	1	0	1	1	0	1	1	1	0	0	0	1	1	1	1	1	0	1	1	0
Baikal-deep-G196	62.79	0	0	0	0	0	1	0	1	1	1	0	1	1	1	1	1	1	1	1	1	1	1	0	1	1	0	0	1	1	1	1	0	1	1	0	1	1	1	0	1	0	0	0
Baikal-deep-G199	83.72	1	0	0	1	1	1	0	1	1	1	1	1	1	1	1	1	1	1	1	1	1	1	0	1	1	1	1	1	1	1	1	0	1	1	1	1	1	1	0	1	1	1	0
Baikal-deep-G200	67.44	1	1	1	0	0	0	1	0	1	0	0	0	1	1	1	1	1	1	1	1	1	1	0	1	1	1	0	1	1	0	0	0	0	1	1	1	1	1	0	1	1	1	1
Baikal-deep-G202	95.34	1	1	1	1	1	1	1	1	1	1	1	1	1	1	1	1	1	1	1	1	1	1	0	1	1	1	1	1	1	1	1	0	1	1	1	1	1	1	1	1	1	1	1
Baikal-deep-G203	90.69	0	1	1	1	1	1	1	1	1	1	1	1	1	1	1	1	1	1	1	1	1	0	0	1	1	1	1	1	1	1	1	0	1	1	1	1	1	1	1	1	1	1	1
Baikal-deep-G206	95.34	1	1	1	1	1	1	1	1	1	1	1	1	1	1	1	1	1	1	1	1	1	1	1	1	1	0	1	1	1	1	1	1	1	1	1	1	1	1	1	1	1	0	1
Baikal-deep-G207	90.69	1	1	1	1	1	1	1	1	1	1	1	1	1	1	1	1	1	1	1	1	1	1	0	1	1	1	1	1	1	1	1	0	1	1	1	1	1	1	1	0	1	1	0
Baikal-deep-G209	83.72	1	1	1	1	1	1	0	1	1	1	1	1	0	1	1	1	1	1	1	1	1	1	0	1	0	1	1	1	1	1	1	0	0	0	1	1	1	1	1	1	1	1	1
Baikal-deep-G210	88.37	0	1	1	1	1	1	0	1	1	1	1	1	1	1	1	1	1	1	1	1	1	1	0	1	1	1	1	1	1	1	1	0	0	1	1	1	1	1	1	1	1	1	1
Baikal-deep-G211	97.67	1	1	1	0	1	1	1	1	1	1	1	1	1	1	1	1	1	1	1	1	1	1	1	1	1	1	1	1	1	1	1	1	1	1	1	1	1	1	1	1	1	1	1
Baikal-deep-G212	88.37	1	1	1	1	1	1	1	0	0	1	1	1	1	1	1	1	1	1	1	1	1	1	1	1	1	0	1	1	1	1	1	0	1	1	1	1	1	1	0	1	1	1	1
Biwa-bin1	90.69	1	0	0	1	1	1	1	1	1	1	1	1	1	1	1	1	1	1	1	1	1	1	0	1	1	1	1	1	1	1	1	0	1	1	1	1	1	1	1	1	1	1	1
Biwa-bin2	97.67	1	1	1	1	1	1	1	1	1	1	1	1	1	1	1	1	1	1	1	1	1	1	0	1	1	1	1	1	1	1	1	1	1	1	1	1	1	1	1	1	1	1	1
CH-Jul18-211	95.34	1	1	1	1	1	1	1	1	1	1	1	1	1	1	1	1	1	1	1	1	1	1	1	1	1	1	1	1	1	1	1	0	1	1	1	1	1	1	1	1	0	1	1
CH-Jul18-212	76.74	1	1	1	0	0	1	0	0	1	1	1	1	1	1	1	1	1	1	1	0	1	1	0	1	1	1	1	1	1	1	1	0	1	1	1	1	1	1	0	1	0	1	0
CH-Jul18-31	58.13	1	1	1	1	1	1	1	1	0	1	1	1	1	0	1	1	1	0	0	1	0	0	0	0	1	0	0	1	0	1	1	0	1	1	0	0	0	0	1	0	1	0	1
CH-Jul18-93	83.72	0	1	1	1	1	1	1	1	0	1	1	1	1	1	1	1	1	1	1	1	1	1	0	1	1	1	0	1	1	1	1	0	1	1	1	1	1	1	1	0	1	0	1
CH-Jul18-99	93.02	1	1	1	1	1	1	0	1	1	1	1	1	1	1	1	1	1	1	1	1	1	1	0	1	1	1	1	1	1	1	1	0	1	1	1	1	1	1	1	1	1	1	1
CH-Oct18-100	79.06	1	1	1	0	0	0	1	1	0	1	0	1	1	1	1	1	1	1	1	1	1	0	0	1	1	1	1	1	1	0	1	0	1	1	1	1	1	1	1	1	1	1	1
CH-Oct18-118	90.69	0	1	1	1	1	1	0	1	1	1	1	1	1	1	1	1	1	1	1	1	1	1	0	1	1	1	1	1	1	1	1	0	1	1	1	1	1	1	1	1	1	1	1
CH-Oct18-39	93.02	1	0	0	1	1	1	1	1	1	1	1	1	1	1	1	1	1	1	1	1	1	1	0	1	1	1	1	1	1	1	1	1	1	1	1	1	1	1	1	1	1	1	1
CH-Oct18-50	86.04	1	0	0	1	1	1	1	0	0	1	1	1	1	1	1	1	1	1	1	1	1	1	0	1	1	1	1	1	1	1	1	0	1	1	1	1	1	1	1	1	1	1	1
CH-Oct18-75	97.67	1	1	1	1	1	1	1	1	1	1	1	1	1	1	1	1	1	1	1	1	1	1	1	1	1	1	1	1	1	1	1	0	1	1	1	1	1	1	1	1	1	1	1
CH-Oct18-76	86.04	1	1	1	1	1	1	0	1	1	1	1	1	0	1	1	1	1	1	1	1	1	1	0	0	1	1	1	1	0	1	1	0	1	1	1	1	1	1	1	1	1	1	1
CH-Oct18-95	93.02	1	1	1	1	1	1	1	1	1	1	1	1	1	1	1	1	1	1	1	1	1	1	0	1	1	1	1	1	1	1	1	0	1	1	1	1	1	1	0	1	1	1	1
CH-Oct18-96	90.69	1	1	0	1	1	1	1	0	1	1	1	1	1	1	1	1	1	1	1	1	1	1	0	1	1	1	1	1	1	1	1	0	1	1	1	1	1	1	1	1	1	1	1
GH-07nov19-153	100	1	1	1	1	1	1	1	1	1	1	1	1	1	1	1	1	1	1	1	1	1	1	1	1	1	1	1	1	1	1	1	1	1	1	1	1	1	1	1	1	1	1	1
Ike-100m-1	90.69	1	1	0	1	1	0	1	1	1	1	1	1	1	1	1	1	1	1	1	1	1	1	0	1	1	1	1	1	1	1	1	0	1	1	1	1	1	1	1	1	1	1	1
Ike-100m-12	93.02	1	1	1	1	1	1	1	0	1	1	1	1	1	1	1	1	1	1	1	1	1	1	0	1	1	1	1	1	1	1	1	0	1	1	1	1	1	1	1	1	1	1	1
Ike-100m-2	93.02	1	1	1	1	1	1	1	1	1	1	1	1	1	1	1	1	1	1	1	1	1	1	0	1	1	1	1	1	1	1	1	0	0	1	1	1	1	1	1	1	1	1	1
Ike-100m-20	93.02	1	0	0	1	1	1	1	1	1	1	1	1	1	1	1	1	1	1	1	1	1	1	0	1	1	1	1	1	1	1	1	1	1	1	1	1	1	1	1	1	1	1	1
Ike-100m-30	95.34	1	1	1	1	1	1	1	1	1	1	1	1	1	1	1	1	1	1	1	1	1	1	0	1	1	1	1	1	1	1	1	0	1	1	1	1	1	1	1	1	1	1	1
Ike-100m-32	83.72	1	1	1	1	1	1	0	1	1	0	1	1	1	1	1	1	1	1	1	1	1	0	0	1	1	1	1	1	1	1	1	0	1	0	1	1	1	1	1	1	0	1	1
Ike-100m-33	90.69	0	1	1	1	1	1	0	1	1	1	1	1	1	1	1	1	1	1	1	1	1	0	0	1	1	1	1	1	1	1	1	1	1	1	1	1	1	1	1	1	1	1	1
Ike-100m-35	76.74	0	1	1	1	1	0	1	0	1	1	1	0	1	1	1	1	1	1	1	1	1	1	1	0	1	1	1	1	1	1	0	0	1	0	1	1	1	1	1	1	0	1	0
Ike-100m-40	93.02	1	1	1	1	1	1	1	1	1	1	1	1	1	1	1	1	1	1	1	1	1	1	0	1	1	1	1	1	0	1	1	0	1	1	1	1	1	1	1	1	1	1	1
Ike-100m-41	93.02	1	1	1	1	1	1	0	1	1	1	1	1	1	1	1	1	1	1	1	1	1	1	0	1	1	1	1	1	1	1	1	0	1	1	1	1	1	1	1	1	1	1	1
Ike-150m-21	90.69	1	1	1	1	1	1	1	0	1	1	1	1	1	1	1	1	1	1	1	1	1	1	0	1	1	1	1	1	1	1	1	0	0	1	1	1	1	1	1	1	1	1	1
Ike-150m-34	93.02	1	1	1	1	1	1	1	0	1	1	1	1	1	1	1	1	1	1	1	1	1	1	0	1	1	1	1	1	1	1	1	1	0	1	1	1	1	1	1	1	1	1	1
Ike-150m-44	97.67	1	1	1	1	1	1	1	1	1	1	1	1	1	1	1	1	1	1	1	1	1	1	1	1	1	1	1	1	1	1	1	0	1	1	1	1	1	1	1	1	1	1	1
Ike-150m-55	79.06	1	1	1	1	1	1	1	1	0	1	1	1	1	0	0	1	1	1	1	0	1	1	0	1	1	1	1	1	1	1	1	0	1	1	1	1	0	0	1	1	1	0	1
Ike-200m-19	86.04	1	0	0	1	1	0	1	1	1	1	1	1	1	1	1	1	1	1	1	1	1	1	1	0	1	1	1	1	1	1	1	0	1	1	1	1	1	1	1	1	1	1	0
Ike-200m-22	93.02	1	1	1	1	1	1	1	1	1	1	1	1	1	1	1	1	1	1	1	1	1	1	0	1	1	1	1	1	1	1	1	0	1	1	1	1	1	1	1	0	1	1	1
Ike-200m-38	97.67	1	1	1	1	1	1	1	1	1	1	1	1	1	1	1	1	1	1	1	1	1	1	1	1	1	1	1	1	1	1	1	0	1	1	1	1	1	1	1	1	1	1	1
Ike-200m-53	97.67	1	1	1	1	1	1	1	1	1	1	1	1	1	1	1	1	1	1	1	1	1	1	0	1	1	1	1	1	1	1	1	1	1	1	1	1	1	1	1	1	1	1	1
Ike-200m-9	97.67	1	1	1	1	1	1	1	1	1	1	1	1	1	1	1	1	1	1	1	1	1	1	1	1	1	1	1	1	1	1	1	0	1	1	1	1	1	1	1	1	1	1	1
Ike-50m-33	95.34	1	1	1	1	1	1	1	1	1	1	1	1	1	1	1	1	1	1	1	1	1	1	0	1	1	1	1	1	1	1	1	0	1	1	1	1	1	1	1	1	1	1	1
Ike-50m-40	88.37	1	1	1	1	1	1	1	0	1	1	1	1	1	1	1	0	1	1	1	1	1	0	0	1	1	1	1	1	1	1	1	0	1	1	1	1	1	1	1	1	1	1	1
Ike-50m-54	97.67	1	1	1	1	1	1	1	1	1	1	1	1	1	1	1	1	1	1	1	1	1	1	0	1	1	1	1	1	1	1	1	1	1	1	1	1	1	1	1	1	1	1	1
Jr-19feb18-57	88.37	1	0	0	1	1	1	1	1	1	1	1	1	1	1	1	1	1	1	1	1	1	1	0	1	1	1	1	1	0	1	1	0	1	1	1	1	1	1	1	1	1	1	1
Jr-19feb18-67	55.81	1	1	1	1	1	1	1	0	1	1	1	1	1	0	0	0	1	0	1	0	0	0	0	0	1	1	1	0	1	1	1	0	0	1	1	1	0	0	0	0	0	1	0
LH-02apr19-200	81.39	1	0	0	1	1	1	1	1	1	1	1	1	1	1	0	0	1	1	1	0	1	1	1	1	1	0	1	1	1	1	1	0	1	1	1	1	0	1	1	1	1	1	1
LH-02apr19-23	72.09	0	0	0	0	0	1	1	1	0	1	0	1	1	1	1	1	1	1	1	1	1	1	0	1	1	1	1	1	0	1	0	0	1	1	1	1	1	1	1	1	1	1	0
LH-02apr19-231	81.39	1	1	1	0	0	1	1	0	1	1	0	1	1	1	1	1	1	1	1	1	1	1	0	1	1	1	0	1	1	1	1	0	1	1	1	1	1	1	1	1	1	1	0
LH-05nov19.122	46.51	1	0	0	0	0	0	1	1	1	1	0	0	0	0	0	0	0	0	0	0	0	0	1	1	0	1	1	1	1	0	1	1	0	0	1	1	0	0	1	1	1	1	1
ME-08apr19-244	95.34	1	1	1	1	1	1	1	1	1	1	1	1	1	1	1	1	1	1	1	1	1	1	0	1	1	1	1	1	1	1	1	1	1	1	1	1	1	1	0	1	1	1	1
MH-08apr19-36	76.74	1	0	1	1	1	1	0	0	0	1	1	1	1	1	1	1	1	1	1	1	1	1	0	1	1	1	1	0	1	1	1	0	1	0	1	1	1	1	1	1	0	1	0
MH-09jul19-147	97.67	1	1	1	1	1	1	1	1	1	1	1	1	1	1	1	1	1	1	1	1	1	1	0	1	1	1	1	1	1	1	1	1	1	1	1	1	1	1	1	1	1	1	1
MH-21oct19-172	97.67	1	1	1	1	1	1	1	1	1	1	1	1	1	1	1	1	1	1	1	1	1	1	0	1	1	1	1	1	1	1	1	1	1	1	1	1	1	1	1	1	1	1	1
MH-21oct19-248	27.9	0	1	1	0	0	0	1	0	0	1	0	0	0	0	0	0	0	0	0	0	0	1	0	1	0	1	1	0	0	0	1	0	0	1	0	0	0	0	0	1	0	0	1
MaH-04nov19-100	95.34	1	1	1	1	1	1	1	1	1	1	1	1	1	1	1	1	1	1	1	1	1	1	0	1	1	1	1	1	1	1	1	1	1	1	1	1	0	1	1	1	1	1	1
MaH-04nov19-107	95.34	0	1	1	1	1	1	1	1	1	1	1	1	1	1	1	1	1	1	1	1	1	1	0	1	1	1	1	1	1	1	1	1	1	1	1	1	1	1	1	1	1	1	1
MaH-04nov19-108	95.34	1	1	1	1	1	1	1	1	1	1	1	1	1	1	1	1	1	1	1	1	1	1	0	1	1	1	1	1	1	1	1	0	1	1	1	1	1	1	1	1	1	1	1
MaH-04nov19-110	95.34	1	1	1	1	1	1	1	1	1	1	1	1	1	1	1	1	1	1	1	1	1	1	0	1	1	1	1	0	1	1	1	1	1	1	1	1	1	1	1	1	1	1	1
MaH-04nov19-141	69.76	1	1	1	1	1	1	1	1	1	1	1	1	1	0	1	1	1	0	0	1	0	1	0	1	1	1	0	1	1	1	1	0	1	1	0	0	0	0	1	1	1	0	0
MaH-04nov19-148	90.69	1	0	0	1	1	1	1	1	1	1	1	1	1	1	1	1	1	1	1	1	1	1	0	1	1	1	1	1	1	1	1	0	1	1	1	1	1	1	1	1	1	1	1
MaH-04nov19-177	95.34	1	1	1	1	1	1	1	1	1	1	1	1	1	1	1	1	1	1	1	1	1	1	1	1	1	0	1	1	1	1	1	1	1	1	1	1	1	1	1	1	0	1	1
MaH-04nov19-190	53.48	0	1	1	1	1	1	1	1	0	1	1	1	1	0	0	0	0	0	0	0	0	0	0	1	1	1	0	1	1	1	1	0	1	1	0	0	0	0	1	1	0	0	1
MaH-04nov19-192	93.02	1	1	1	1	1	1	0	1	1	1	1	1	1	1	1	1	1	1	1	1	1	1	0	1	1	1	1	1	1	1	1	0	1	1	1	1	1	1	1	1	1	1	1
MaH-04nov19-195	95.34	1	1	1	1	1	1	1	1	1	1	1	1	1	1	1	1	1	1	1	1	1	1	0	1	1	1	1	1	1	1	1	0	1	1	1	1	1	1	1	1	1	1	1
MaH-04nov19-197	93.02	1	1	1	1	1	1	1	1	1	1	1	1	1	1	1	1	1	1	1	1	1	1	0	1	1	1	1	1	1	1	1	0	1	1	1	1	1	1	1	1	0	1	1
MaH-04nov19-216	95.34	1	1	1	1	1	1	1	1	1	1	1	1	1	1	1	1	1	1	1	1	1	1	0	1	1	1	1	1	1	1	1	1	0	1	1	1	1	1	1	1	1	1	1
MaH-04nov19-253	60.46	1	0	0	0	1	1	1	1	1	1	1	1	1	1	1	1	1	0	0	1	0	1	0	1	1	1	0	1	0	1	0	0	1	1	0	0	1	0	1	0	1	0	0
MaH-04nov19-275	100	1	1	1	1	1	1	1	1	1	1	1	1	1	1	1	1	1	1	1	1	1	1	1	1	1	1	1	1	1	1	1	1	1	1	1	1	1	1	1	1	1	1	1
MaH-04nov19-280	93.02	1	1	1	1	1	1	0	1	1	1	1	1	1	1	1	1	1	1	1	1	1	1	0	1	1	1	1	1	1	1	1	0	1	1	1	1	1	1	1	1	1	1	1
MaH-04nov19-39	97.67	1	1	1	1	1	1	1	1	1	1	1	1	1	1	1	1	1	1	1	1	1	1	0	1	1	1	1	1	1	1	1	1	1	1	1	1	1	1	1	1	1	1	1
MaH-04nov19-42	97.67	1	1	1	1	1	1	1	1	1	1	1	1	1	1	1	1	1	1	1	1	1	1	0	1	1	1	1	1	1	1	1	1	1	1	1	1	1	1	1	1	1	1	1
MaH-04nov19-6	93.02	0	1	1	1	1	1	1	1	1	1	1	1	1	1	1	1	1	1	1	1	1	1	0	1	1	1	1	1	1	1	1	0	1	1	1	1	1	1	1	1	1	1	1
MaH-04nov19-71	93.02	1	0	1	1	1	1	1	1	1	1	1	1	1	1	1	1	1	1	1	1	1	1	0	1	1	1	1	1	1	1	1	0	1	1	1	1	1	1	1	1	1	1	1
MaH-04nov19-74	100	1	1	1	1	1	1	1	1	1	1	1	1	1	1	1	1	1	1	1	1	1	1	1	1	1	1	1	1	1	1	1	1	1	1	1	1	1	1	1	1	1	1	1
MaH-04nov19-81	93.02	1	1	1	1	1	1	1	0	1	1	1	1	1	1	1	1	1	1	1	1	1	1	0	1	1	1	1	1	1	1	1	0	1	1	1	1	1	1	1	1	1	1	1
MaH-04nov19-96	95.34	1	1	1	1	1	1	1	1	1	1	1	1	1	1	1	1	1	1	1	1	1	1	0	1	1	1	1	1	1	1	1	1	0	1	1	1	1	1	1	1	1	1	1
MaH-04nov19-97	90.69	1	1	1	1	1	1	1	1	1	1	1	1	1	1	1	1	1	1	1	1	1	1	0	1	1	1	1	0	1	1	1	0	1	1	1	0	1	1	1	1	1	1	1
MaH-09apr19-126	93.02	1	1	0	1	1	1	1	1	1	1	1	1	1	1	1	1	1	1	1	1	1	1	0	1	1	1	1	1	1	1	1	0	1	1	1	1	1	1	1	1	1	1	1
MaH-09apr19-135	76.74	1	0	0	1	1	1	1	1	1	1	1	1	0	1	1	0	0	1	1	1	1	1	0	1	0	1	1	1	1	1	1	1	0	0	1	1	1	1	1	1	0	1	1
MaH-09apr19-142	95.34	1	1	1	1	1	1	1	1	1	1	1	1	1	1	1	1	1	1	1	1	1	1	0	1	1	1	1	1	1	1	1	0	1	1	1	1	1	1	1	1	1	1	1
MaH-09apr19-161	79.06	1	1	1	0	1	1	1	1	1	1	1	1	1	1	1	1	1	1	0	1	1	1	0	1	1	1	0	1	1	1	1	0	1	1	0	0	1	1	1	1	1	0	0
MaH-09apr19-163	32.55	1	1	1	0	0	0	0	1	0	0	0	0	0	0	0	0	0	0	0	0	0	1	0	1	0	1	1	1	1	0	1	0	0	0	0	0	0	0	0	1	1	0	1
MaH-09apr19-169	100	1	1	1	1	1	1	1	1	1	1	1	1	1	1	1	1	1	1	1	1	1	1	1	1	1	1	1	1	1	1	1	1	1	1	1	1	1	1	1	1	1	1	1
MaH-09apr19-170	25.58	1	1	1	0	0	0	1	1	0	1	0	0	0	0	0	0	0	0	0	0	0	0	0	0	0	0	0	0	1	0	1	0	0	0	0	0	0	0	0	1	1	0	1
MaH-09apr19-187	90.69	1	1	1	1	1	1	1	1	1	0	1	1	1	1	1	1	1	1	1	1	1	1	1	1	1	0	1	1	1	1	1	1	1	1	1	1	1	1	0	0	1	1	1
MaH-09apr19-21	97.67	1	1	1	1	1	1	1	1	1	1	1	1	1	1	1	1	1	1	1	1	1	1	1	1	1	1	1	1	1	1	1	0	1	1	1	1	1	1	1	1	1	1	1
MaH-09apr19-211	74.41	1	1	1	1	1	0	1	1	1	1	1	0	0	1	1	1	1	1	1	1	1	1	0	1	1	0	1	1	1	1	1	0	0	0	0	1	1	1	0	1	1	0	1
MaH-09apr19-218	93.02	1	1	1	1	1	1	1	0	1	1	1	1	1	1	1	1	1	1	1	1	1	1	0	1	1	1	1	1	1	1	1	0	1	1	1	1	1	1	1	1	1	1	1
MaH-09apr19-23	90.69	1	0	1	1	1	1	1	1	1	1	1	1	1	1	1	1	1	1	1	1	1	1	0	1	1	1	1	1	1	1	1	0	1	1	1	1	1	1	1	1	0	1	1
MaH-09apr19-231	86.04	1	1	1	1	1	1	1	1	1	1	1	1	1	1	1	1	1	1	1	1	1	1	0	1	1	1	1	1	1	1	1	0	1	1	0	1	1	1	0	1	1	0	0
MaH-09apr19-234	97.67	1	1	1	1	1	1	1	1	1	1	1	1	1	1	1	1	1	1	1	1	1	1	0	1	1	1	1	1	1	1	1	1	1	1	1	1	1	1	1	1	1	1	1
MaH-09apr19-248	95.34	1	1	1	1	1	1	1	1	1	1	1	1	1	1	1	1	1	1	1	1	1	1	0	1	1	1	1	1	1	1	1	1	0	1	1	1	1	1	1	1	1	1	1
MaH-09apr19-252	67.44	1	1	1	0	0	0	1	0	1	1	0	0	1	1	1	1	1	1	1	1	1	0	0	0	1	1	1	1	0	0	0	0	1	1	1	1	1	1	1	1	0	1	1
MaH-09apr19-3	90.69	1	1	1	1	1	1	0	1	0	1	1	1	1	1	1	1	1	1	1	1	1	1	0	1	1	1	1	1	1	1	1	0	1	1	1	1	1	1	1	1	1	1	1
MaH-09apr19-65	93.02	1	1	1	1	1	1	1	1	1	1	1	1	1	1	1	1	1	1	1	1	1	1	0	1	1	1	1	1	0	1	1	0	1	1	1	1	1	1	1	1	1	1	1
MaH-09apr19-83	81.39	0	0	0	1	1	1	0	1	1	1	1	1	1	1	1	1	1	1	1	1	1	1	0	1	1	1	0	0	1	1	1	1	1	1	1	1	1	1	1	1	1	1	0
MaH-09apr19-90	81.39	1	1	1	1	1	1	0	0	1	0	1	1	1	1	1	1	1	1	1	1	1	1	0	1	1	1	0	1	1	1	1	0	1	1	1	1	1	1	0	1	1	0	1
Mag-100m-18	97.67	1	1	1	1	1	1	1	1	1	1	1	1	1	1	1	1	1	1	1	1	1	1	0	1	1	1	1	1	1	1	1	1	1	1	1	1	1	1	1	1	1	1	1
Mag-300m-26	62.79	0	0	1	1	1	0	0	1	0	1	1	1	1	1	1	1	1	1	0	1	1	1	0	0	1	0	1	1	1	1	0	0	1	1	0	0	1	1	0	1	0	0	1
Mag-300m-37	88.37	1	1	1	1	1	1	1	1	1	0	1	1	1	1	1	1	1	1	1	1	1	1	0	1	1	1	1	1	0	1	1	0	1	1	1	1	1	1	1	0	1	1	1
Mag-300m-6	46.51	1	1	1	1	1	1	1	0	0	1	1	1	1	0	0	0	0	0	0	0	0	1	0	0	1	0	0	1	0	1	1	1	1	1	0	0	0	0	0	0	0	0	1
MiE-14oct19-109	95.34	1	1	1	1	1	1	1	1	1	1	1	1	1	1	1	1	1	1	1	1	1	1	0	1	1	1	1	1	1	1	1	0	1	1	1	1	1	1	1	1	1	1	1
MiE-16apr19-201	95.34	1	1	1	1	1	1	1	1	1	1	1	1	1	1	1	1	1	1	1	1	1	1	0	1	1	1	1	1	1	1	1	1	1	1	1	1	1	1	1	1	1	1	0
MiE-16apr19-257	90.69	1	1	1	1	1	1	1	1	1	1	1	1	1	1	1	1	1	1	1	1	1	0	0	1	1	1	1	1	1	1	1	0	1	1	1	1	1	1	1	0	1	1	1
MiH-14oct19-109	95.34	1	1	1	1	1	1	1	1	1	1	1	1	1	1	1	1	1	1	1	1	1	1	0	1	1	1	1	1	1	1	1	0	1	1	1	1	1	1	1	1	1	1	1
MiH-14oct19-129	74.41	1	1	1	1	0	0	1	1	1	1	0	0	1	1	1	1	1	1	0	1	1	1	1	1	1	1	0	1	1	0	1	0	1	1	0	0	1	1	1	1	1	0	1
MiH-14oct19-207	83.72	0	1	1	1	1	1	1	1	0	1	1	1	1	1	1	1	1	1	1	1	1	1	0	1	1	1	1	1	0	1	0	0	1	1	1	1	1	1	1	1	0	1	1
MiH-16apr19-11	95.34	1	1	1	1	1	1	1	0	1	1	1	1	1	1	1	1	1	1	1	1	1	1	0	1	1	1	1	1	1	1	1	1	1	1	1	1	1	1	1	1	1	1	1
MiH-16apr19-251	90.69	1	1	1	1	1	1	0	1	1	1	1	1	1	1	1	1	1	1	1	1	1	1	0	1	1	1	1	1	1	1	1	0	1	1	1	1	1	1	1	1	1	1	0
MoH-23oct19-148	83.72	1	0	1	1	1	1	1	1	1	1	1	1	0	1	1	1	1	1	1	1	1	1	0	1	0	1	1	1	1	1	1	0	0	0	1	1	1	1	1	1	1	1	1
MoH-23oct19-239	95.34	1	1	1	1	1	1	1	1	1	1	1	1	1	1	1	1	1	1	1	1	1	1	0	1	1	1	1	1	1	1	1	0	1	1	1	1	1	1	1	1	1	1	1
MsE-30apr19-136	48.83	1	0	1	1	1	0	1	0	0	1	1	1	0	0	0	0	0	1	1	0	0	1	0	0	0	1	1	1	0	1	0	0	0	0	1	1	0	1	1	0	1	1	0
MsH-01oct19-133	97.67	1	1	1	1	1	1	1	1	1	1	1	1	1	1	1	1	1	1	1	1	1	1	0	1	1	1	1	1	1	1	1	1	1	1	1	1	1	1	1	1	1	1	1
MsH-01oct19-19	72.09	1	0	0	1	1	1	1	1	1	1	1	1	1	1	1	1	1	0	0	1	0	1	0	1	1	1	0	1	1	1	1	0	1	1	0	0	1	0	1	1	1	0	1
MsH-01oct19-288	95.34	1	1	1	1	1	1	1	1	1	1	1	1	1	1	1	1	1	1	1	1	1	1	0	1	1	1	1	1	1	1	1	0	1	1	1	1	1	1	1	1	1	1	1
MsH-01oct19-81	79.06	1	1	1	1	1	0	1	0	0	1	1	0	0	1	1	1	1	1	1	1	1	1	0	1	1	1	1	0	1	1	1	0	1	1	1	1	1	1	0	1	1	1	1
MsH-01oct19-87	90.69	1	1	1	1	1	1	1	1	1	1	1	0	1	1	1	1	1	1	1	1	1	1	0	1	1	1	1	1	1	1	1	0	1	1	1	1	1	1	1	0	1	1	1
MsH-01oct19-93	81.39	1	0	1	1	1	1	1	1	1	1	1	1	1	0	0	0	1	1	1	0	1	1	0	1	1	1	1	1	1	1	1	1	1	1	1	1	0	1	1	0	1	1	1
MsH-30apr19-258	74.41	1	1	0	1	1	1	1	1	1	0	1	1	1	0	1	1	1	1	1	1	0	1	0	1	1	1	1	0	0	1	1	1	1	1	1	1	0	1	0	1	0	1	0
MsH-30apr19-336	93.02	1	0	1	1	1	1	1	1	1	1	1	1	1	0	1	1	1	1	1	1	1	1	0	1	1	1	1	1	1	1	1	1	1	1	1	1	1	1	1	1	1	1	1
MsH-30jul19.11	95.34	1	1	1	1	1	1	1	1	1	1	1	1	1	1	1	1	1	1	1	1	1	1	0	1	1	1	1	1	1	1	1	0	1	1	1	1	1	1	1	1	1	1	1
RE-15aug16-192	95.34	1	1	1	1	1	1	1	1	1	1	1	1	1	1	1	1	1	1	1	1	1	1	0	1	1	1	1	1	1	1	1	0	1	1	1	1	1	1	1	1	1	1	1
RE-20apr16-173	81.39	1	1	1	1	1	1	1	1	1	1	1	1	1	1	1	1	1	1	1	1	1	1	0	1	1	1	0	1	1	1	0	0	1	1	0	1	1	1	0	1	0	0	1
RE-4nov15-20	86.04	1	0	0	1	1	1	1	1	1	1	1	1	1	1	1	1	1	1	1	1	1	1	1	0	1	1	1	1	1	1	1	0	1	1	1	1	1	1	0	0	1	1	1
RE-4nov15-362	88.37	1	1	1	0	0	1	1	1	1	1	1	1	1	1	1	1	1	1	1	1	1	1	0	1	1	1	1	1	1	1	0	0	1	1	1	1	1	1	1	1	1	1	1
RH-14apr17-375	86.04	1	1	1	1	1	1	1	1	1	1	1	1	1	1	1	1	1	1	1	1	1	0	0	0	1	1	1	1	1	1	0	0	1	1	1	1	1	1	1	0	1	1	1
RH-14apr17-556	90.69	1	1	1	1	1	1	1	1	1	1	1	1	1	1	1	1	1	1	1	1	1	0	0	1	1	1	1	1	1	1	1	0	1	1	1	1	1	1	1	0	1	1	1
RH-15aug16-101	58.13	1	1	1	0	0	1	1	0	0	1	0	1	1	0	0	0	1	1	1	0	0	0	1	1	1	1	0	1	0	1	1	0	1	1	0	1	0	1	0	1	1	0	1
RH-15aug16-19	95.34	1	1	1	1	1	1	1	1	1	1	1	1	1	1	1	1	1	1	1	1	1	1	0	1	1	1	1	1	1	1	1	0	1	1	1	1	1	1	1	1	1	1	1
RH-15aug16-383	76.74	1	1	1	1	1	0	1	0	1	1	1	0	1	1	1	1	0	1	0	1	1	1	0	1	1	1	1	0	1	0	1	0	1	1	1	0	1	1	1	1	1	1	1
RH-18aug17-140	83.72	1	1	1	1	1	1	1	1	0	1	1	1	1	1	1	1	1	1	1	1	1	1	0	0	1	1	1	0	1	1	1	0	1	1	1	1	1	1	1	0	0	1	1
RH-18aug17-291	16.27	0	0	0	0	0	0	1	1	0	0	0	0	0	0	0	0	0	0	0	0	0	0	0	1	0	0	0	1	0	0	1	0	0	0	0	0	0	0	1	1	0	0	0
RH-18aug17-293	25.58	0	0	0	1	1	0	1	1	0	0	1	0	0	0	0	0	0	0	0	0	0	1	0	1	0	0	0	1	0	0	0	0	0	0	0	0	0	0	1	1	0	0	1
RH-18aug17-358	76.74	0	1	1	0	0	1	1	1	1	1	0	1	1	1	1	1	1	1	1	1	1	0	0	0	1	1	1	1	1	1	1	0	1	1	1	1	1	1	1	0	0	1	1
RH-20apr16-175	86.04	0	1	1	1	1	1	0	1	0	1	1	1	1	1	1	1	1	1	1	1	1	1	0	1	1	1	1	1	1	1	1	0	1	1	1	1	1	1	1	0	1	1	1
RH-20apr16-307	65.11	1	0	0	1	1	1	1	0	1	1	1	1	0	1	0	0	0	1	1	0	1	1	0	1	0	0	0	1	1	1	1	0	0	1	1	1	1	1	1	1	0	1	1
RH-20apr16-349	95.34	1	1	1	1	1	1	1	1	1	1	1	1	1	1	1	1	1	1	1	1	1	1	0	1	1	1	1	1	1	1	1	0	1	1	1	1	1	1	1	1	1	1	1
RH-20apr16-362	79.06	0	1	1	0	0	1	1	1	1	1	0	1	1	1	1	1	1	1	1	1	1	1	0	0	1	1	1	1	0	1	1	0	1	1	1	1	1	1	1	1	0	1	1
RH-23may17-1	86.04	1	1	1	1	1	1	1	1	1	1	1	1	1	1	1	1	1	1	1	1	1	0	0	0	1	1	1	1	1	1	0	0	1	1	1	1	1	1	1	0	1	1	1
RH-23may17-1099	97.67	1	1	1	1	1	1	1	1	1	1	1	1	1	1	1	1	1	1	1	1	1	1	1	0	1	1	1	1	1	1	1	1	1	1	1	1	1	1	1	1	1	1	1
RH-23may17-1275	30.23	0	0	0	0	0	0	1	1	1	1	0	0	0	0	0	0	0	0	0	0	0	1	0	1	0	1	0	1	1	0	1	0	0	0	0	0	0	0	1	0	1	0	1
RH-23may17-1289	95.34	1	1	1	1	1	1	1	1	1	1	1	1	1	1	1	1	1	1	1	1	1	1	0	1	1	1	1	1	1	1	1	0	1	1	1	1	1	1	1	1	1	1	1
RH-23may17-197	46.51	1	1	1	1	1	1	1	1	0	1	1	0	0	0	0	0	0	0	0	0	0	1	0	1	0	0	1	1	1	1	1	0	0	0	0	0	0	0	1	1	0	0	1
RH-23may17-223	23.25	1	0	0	0	0	0	1	1	0	1	0	0	0	0	0	0	0	0	0	0	0	0	0	0	0	1	0	0	0	0	1	0	0	0	0	0	0	0	1	1	1	0	1
RH-23may17-261	27.9	1	0	0	0	0	0	0	1	1	1	0	0	0	0	0	0	0	0	0	0	0	1	0	1	0	0	0	1	1	0	1	1	0	0	0	0	0	0	1	1	0	0	0
RH-23may17-429	90.69	1	1	1	1	1	1	1	0	0	1	1	1	1	1	1	1	1	1	1	1	1	0	1	1	1	1	1	1	1	1	1	0	1	1	1	1	1	1	1	1	1	1	1
RH-23may17-877	69.76	0	0	1	0	0	0	1	1	1	0	0	0	1	1	1	1	1	1	1	1	1	0	0	1	1	1	1	1	1	0	1	0	1	1	1	1	1	1	1	1	0	1	1
RH-23may17-878	86.04	1	1	1	1	1	1	0	1	1	1	1	1	1	1	1	1	1	1	1	1	1	1	0	1	1	0	1	1	0	1	1	0	1	1	1	1	1	1	1	1	0	1	1
RH-26jul17-192	86.04	0	1	1	1	1	1	1	1	1	0	1	1	1	1	1	1	1	1	1	1	1	1	0	1	1	1	1	1	1	1	1	0	1	1	1	1	1	1	0	1	0	1	1
RH-26jul17-250	79.06	0	0	0	1	1	1	1	0	1	1	1	1	1	1	1	1	1	1	1	1	1	1	0	0	1	1	1	1	1	1	1	0	1	1	1	1	1	1	1	1	0	1	0
RH-26jul17-300	86.04	1	1	1	1	1	1	1	1	1	1	1	1	1	1	1	1	1	1	1	1	1	0	0	1	1	1	0	1	1	1	0	0	1	1	1	1	1	1	1	0	1	1	1
RH-26jul17-60	79.06	0	1	1	0	0	1	1	1	1	1	1	1	1	0	1	1	1	1	1	1	0	0	0	1	1	1	1	0	1	1	1	0	1	1	1	1	1	1	1	1	1	1	1
RH-26jul17-99	90.69	1	1	1	1	1	1	1	1	0	1	1	1	1	1	1	1	1	1	1	1	1	1	0	1	1	1	1	1	1	1	1	0	1	1	1	1	1	1	1	0	1	1	1
RH-27jun17-110	72.09	0	1	1	1	1	1	0	1	1	1	1	1	0	1	1	1	0	1	1	1	1	0	0	1	0	1	1	1	1	1	1	0	0	1	1	1	1	1	1	0	0	1	0
RH-27jun17-134	76.74	0	1	1	1	1	1	1	1	1	0	1	1	1	1	1	1	1	1	1	1	1	0	0	0	1	1	1	0	1	1	0	0	1	1	1	1	1	1	1	0	0	1	1
RH-27jun17-331	90.69	1	1	1	1	1	1	1	0	1	1	1	1	1	1	1	1	1	1	1	1	1	1	0	1	1	1	1	1	1	1	1	0	1	1	1	1	1	1	1	1	0	1	1
RH-27jun17-373	86.04	1	1	1	1	1	1	0	1	1	1	1	1	1	1	1	1	1	1	1	1	1	0	0	1	1	1	1	1	1	1	1	0	1	1	1	1	1	1	1	0	0	1	1
RH-27jun17-64	39.53	1	1	1	0	0	0	1	1	1	1	0	0	0	0	0	0	0	0	0	0	0	1	0	1	0	1	1	1	1	0	1	0	0	0	0	0	0	0	1	1	0	0	1
RH-9nov16-150	93.02	1	0	0	1	1	1	1	0	1	1	1	1	1	1	1	1	1	1	1	1	1	1	1	1	1	1	1	1	1	1	1	1	1	1	1	1	1	1	1	1	1	1	1
TE-08apr19-119	74.41	1	1	1	1	1	1	1	1	1	1	1	1	0	1	1	1	0	1	0	1	1	1	1	1	0	1	0	1	1	1	1	0	0	0	0	0	1	1	1	1	1	0	1
TH-08apr19-104	83.72	1	1	1	1	1	1	0	1	1	1	1	1	1	1	0	0	1	1	1	1	1	1	0	1	1	1	1	1	1	1	1	0	1	1	1	1	1	1	0	1	1	1	0
TH-08apr19-126	83.72	1	1	1	1	1	1	0	1	1	1	1	1	1	1	1	1	1	1	1	1	1	0	0	0	1	1	1	1	1	1	1	0	1	1	1	1	1	1	1	0	1	1	0
TH-08apr19-173	25.58	1	0	0	0	0	0	0	1	1	1	0	0	0	0	0	0	0	0	0	0	0	1	0	1	0	1	0	0	1	0	0	0	0	0	0	0	0	0	1	1	0	0	1
TH-08apr19-232	93.02	1	1	1	1	1	1	1	1	1	1	1	1	1	1	1	1	1	1	1	1	1	1	0	1	1	1	1	1	1	1	1	0	1	1	1	1	1	1	1	1	1	1	0
TH-08apr19-248	90.69	1	1	1	1	1	1	1	1	1	1	1	1	1	1	0	0	1	1	1	1	1	1	0	1	1	1	1	1	1	1	1	0	1	1	1	1	1	1	1	1	1	1	1
TH-08apr19-279	93.02	1	1	1	1	1	1	1	1	1	1	1	1	1	1	1	1	1	1	1	1	1	1	0	1	1	1	1	0	1	1	1	1	1	1	1	1	1	1	1	1	1	0	1
TH-08apr19-54	97.67	1	1	1	1	1	1	1	1	1	1	1	1	1	1	1	1	1	1	1	1	1	1	0	1	1	1	1	1	1	1	1	1	1	1	1	1	1	1	1	1	1	1	1
TH-11nov19-123	93.02	1	1	1	1	1	1	1	1	1	0	1	1	1	1	1	1	1	1	1	1	1	1	0	1	1	1	1	1	1	1	1	0	1	1	1	1	1	1	1	1	1	1	1
TH-11nov19-135	90.69	1	1	1	1	1	1	1	1	1	1	1	1	1	1	0	0	1	1	1	1	1	1	0	1	1	1	1	1	1	1	1	0	1	1	1	1	1	1	1	1	1	1	1
TH-11nov19-141	97.67	1	1	1	1	1	1	1	1	1	1	1	1	1	1	1	1	1	1	1	1	1	1	0	1	1	1	1	1	1	1	1	1	1	1	1	1	1	1	1	1	1	1	1
TH-11nov19-157	88.37	1	0	0	1	1	1	1	0	1	1	1	1	1	1	1	1	1	1	1	1	1	1	0	1	1	1	1	1	1	1	1	0	1	1	1	1	1	1	1	1	1	1	1
TH-11nov19-158	90.69	1	1	1	1	1	1	1	1	1	1	1	1	1	1	0	0	1	1	1	1	1	1	0	1	1	1	1	1	1	1	1	0	1	1	1	1	1	1	1	1	1	1	1
TH-11nov19-189	62.79	1	1	1	0	0	1	1	0	1	1	0	1	1	0	1	1	1	0	0	1	0	1	0	1	1	1	0	1	1	1	1	0	1	1	0	0	0	0	1	1	1	0	1
TH-11nov19-2	72.09	1	1	1	1	0	0	1	0	0	0	0	0	1	1	1	1	1	1	1	1	1	1	0	1	1	1	1	1	1	0	1	0	0	1	1	1	1	1	1	0	1	1	1
TH-11nov19-213	93.02	1	1	1	1	1	1	1	0	1	1	1	1	1	1	1	1	1	1	1	1	1	1	0	1	1	1	1	1	1	1	1	0	1	1	1	1	1	1	1	1	1	1	1
TH-11nov19-238	95.34	1	1	1	1	1	1	1	1	1	1	1	1	1	1	1	1	1	1	1	1	1	1	0	1	1	1	1	1	1	1	1	0	1	1	1	1	1	1	1	1	1	1	1
TH-11nov19-29	95.34	1	1	1	1	1	1	1	1	1	1	1	1	1	1	1	1	1	1	1	1	1	1	0	1	1	1	1	1	1	1	1	1	1	1	1	1	1	1	1	1	1	0	1
TH-11nov19-49	67.44	1	0	0	1	1	1	1	1	1	1	1	1	0	1	1	1	0	1	0	1	1	1	1	1	0	1	0	1	1	1	1	0	0	0	0	0	1	1	1	1	0	0	1
TH-11nov19-56	93.02	1	1	1	1	1	1	1	1	1	1	1	1	1	1	1	1	1	1	1	1	1	1	0	1	1	1	1	1	1	1	1	0	1	1	1	1	1	1	1	1	1	1	0
TH-11nov19-85	90.69	1	1	1	1	1	1	1	1	1	1	1	1	1	1	1	1	1	1	1	1	1	1	0	0	1	1	1	1	1	1	1	0	0	1	1	1	1	1	1	1	1	1	1
TH-11nov19-92	86.04	0	1	1	1	1	1	1	0	1	1	1	1	1	1	1	1	1	1	1	1	1	1	0	1	1	1	1	0	1	1	1	0	1	1	1	1	1	1	1	0	1	1	1
TH-Jun18-111	97.67	1	1	1	1	1	1	1	1	1	1	1	1	1	1	1	1	1	1	1	1	1	1	0	1	1	1	1	1	1	1	1	1	1	1	1	1	1	1	1	1	1	1	1
TH-Jun18-118	90.69	1	1	1	1	1	1	1	1	1	1	1	1	1	1	0	0	1	1	1	1	1	1	0	1	1	1	1	1	1	1	1	0	1	1	1	1	1	1	1	1	1	1	1
TH-Jun18-152	86.04	1	0	0	1	1	1	1	0	1	1	1	1	1	1	1	1	1	0	1	1	1	1	0	1	1	1	1	1	1	1	1	0	1	1	1	1	1	1	1	1	1	1	1
TH-Jun18-162	53.48	0	1	1	1	1	1	1	1	1	0	1	1	0	0	0	0	0	0	0	0	0	1	0	1	0	1	1	0	1	1	0	1	0	0	1	0	0	0	1	1	1	1	1
TH-Jun18-197	74.41	1	1	1	1	1	0	1	1	0	1	1	0	1	1	0	0	0	1	1	0	1	1	0	1	1	1	1	1	1	0	1	0	1	1	1	1	0	1	1	1	1	1	1
TH-Jun18-261	90.69	1	1	1	1	1	1	1	1	1	1	1	1	1	1	1	1	1	1	1	1	1	1	0	0	1	1	1	1	1	1	1	0	1	1	1	1	1	1	1	1	1	1	0
TH-Jun18-30	97.67	1	1	1	1	1	1	1	1	1	1	1	1	1	1	1	1	1	1	1	1	1	1	0	1	1	1	1	1	1	1	1	1	1	1	1	1	1	1	1	1	1	1	1
TH-Jun18-40	88.37	0	1	1	1	1	1	1	0	1	1	1	1	1	1	1	1	1	1	1	1	1	1	0	1	1	1	1	1	1	1	1	0	1	1	1	1	1	1	1	0	1	1	1
TH-Jun18-49	90.69	1	1	1	1	1	1	1	1	1	0	1	1	1	1	1	1	1	1	1	1	1	1	0	1	1	1	1	1	0	1	1	0	1	1	1	1	1	1	1	1	1	1	1
TH-Jun18-57	79.06	1	1	1	1	1	1	1	1	0	1	1	1	0	1	1	1	1	1	1	1	1	1	0	0	0	1	1	1	1	1	0	0	1	1	1	1	1	1	1	1	0	1	0
TH-Jun18-84	72.09	1	1	1	1	1	1	1	1	1	1	1	1	0	1	1	1	0	1	0	1	1	0	1	1	0	1	0	1	1	1	1	0	0	0	0	0	1	1	1	1	1	0	1
TrE-03may19-249	93.02	1	1	1	1	1	1	1	1	1	1	1	1	1	1	1	1	1	1	1	1	1	1	0	1	1	1	0	1	1	1	1	0	1	1	1	1	1	1	1	1	1	1	1
TrH-03may19-176	46.51	0	1	1	1	1	1	1	1	1	1	1	1	0	0	0	0	0	0	0	0	0	1	0	0	0	1	0	1	1	1	1	0	0	0	0	0	0	0	0	1	1	0	1
TrH-03may19-265	88.37	1	1	1	1	1	1	1	1	1	1	1	1	0	1	1	1	1	1	1	1	1	0	0	1	1	1	1	1	1	1	1	0	1	1	1	1	1	1	0	1	1	1	1
TrH-03may19-290	95.34	1	1	1	1	1	1	1	1	1	1	1	1	1	1	1	1	1	1	1	1	1	1	0	1	1	1	1	1	1	1	1	0	1	1	1	1	1	1	1	1	1	1	1
TrH-03may19-292	88.37	0	1	1	1	1	1	1	1	1	1	1	1	1	1	1	1	1	1	1	1	1	1	0	1	1	1	0	1	1	1	1	0	1	1	1	1	1	1	1	1	1	1	0
TrH-03may19-308	25.58	1	0	0	1	1	0	0	0	1	0	1	0	0	0	0	0	0	0	0	0	0	1	0	0	0	0	1	0	0	0	1	0	0	0	1	0	0	0	0	0	0	1	1
TrH-25oct19-103	90.69	1	0	0	1	1	1	1	1	1	1	1	1	1	1	1	1	1	1	1	1	1	1	0	1	1	1	1	1	1	1	1	0	1	1	1	1	1	1	1	1	1	1	1
TrH-25oct19-144	93.02	1	1	1	1	1	1	1	1	1	1	1	1	1	1	1	1	1	1	1	1	1	1	0	1	1	1	1	1	1	1	1	0	1	1	1	1	1	1	1	1	1	1	0
TrH-25oct19-200	93.02	1	1	1	1	1	1	1	1	1	1	1	1	1	1	1	1	1	1	1	1	1	1	0	1	1	1	1	1	1	1	1	0	0	1	1	1	1	1	1	1	1	1	1
TrH-25oct19-208	95.34	1	1	1	1	1	1	1	1	1	1	1	1	1	1	1	1	1	1	1	1	1	1	0	1	1	1	1	1	1	1	1	0	1	1	1	1	1	1	1	1	1	1	1
TrH-25oct19-271	93.02	1	1	1	1	1	1	1	0	1	1	1	1	1	1	1	1	1	1	1	1	1	1	0	1	1	1	1	1	1	1	1	0	1	1	1	1	1	1	1	1	1	1	1
TrH-25oct19-38	55.81	0	1	1	1	1	1	1	0	1	0	1	1	0	0	1	1	0	0	1	1	0	0	0	0	0	1	0	0	1	1	1	0	0	0	1	1	1	0	1	1	1	0	1
TrH-25oct19-77	79.06	1	1	1	1	1	1	0	1	1	1	1	1	1	0	1	1	1	0	0	1	0	1	1	1	1	1	1	1	1	1	1	0	1	1	1	1	0	0	1	0	1	1	1
TrH-25oct19-80	74.41	1	0	0	0	0	1	1	1	1	0	0	1	1	1	1	1	1	1	1	1	1	1	0	1	1	0	1	0	1	1	1	0	0	1	1	1	1	1	1	1	1	1	1
TrH-25oct19-91	88.37	1	1	1	1	1	1	1	1	1	1	1	1	1	1	1	1	1	1	1	1	1	1	0	1	1	1	0	1	1	1	1	0	1	1	1	1	1	1	1	0	1	1	0
ZE-03apr19-185	97.67	1	1	1	1	1	1	1	1	1	1	1	1	1	1	1	1	1	1	1	1	1	1	1	1	1	1	1	1	1	1	1	0	1	1	1	1	1	1	1	1	1	1	1
ZE-17mar17-112	97.67	1	1	1	1	1	1	1	1	1	1	1	1	1	1	1	1	1	1	1	1	1	1	1	1	1	1	1	1	1	1	1	0	1	1	1	1	1	1	1	1	1	1	1
ZE-17mar17-71	97.67	1	1	1	1	1	1	1	1	1	1	1	1	1	1	1	1	1	1	1	1	1	1	1	1	1	1	1	1	1	1	1	0	1	1	1	1	1	1	1	1	1	1	1
ZE-3nov15-161	76.74	1	1	1	1	0	1	1	1	1	1	0	0	1	1	1	1	1	0	1	1	1	0	0	1	1	1	1	1	1	0	1	0	1	1	1	0	1	1	1	1	1	1	0
ZE-Oct18-214	93.02	1	1	1	1	1	1	1	1	1	1	1	1	1	1	1	1	1	1	1	1	1	1	0	0	1	1	1	1	1	1	1	0	1	1	1	1	1	1	1	1	1	1	1
ZE-Oct18-75	95.34	1	1	1	1	1	1	1	1	1	1	1	1	1	1	1	1	1	1	1	1	1	1	0	1	1	1	1	1	1	1	1	0	1	1	1	1	1	1	1	1	1	1	1
ZH-03apr19-182	97.67	1	1	1	1	1	1	1	1	1	1	1	1	1	1	1	1	1	1	1	1	1	1	1	1	1	1	1	1	1	1	1	0	1	1	1	1	1	1	1	1	1	1	1
ZH-03nov15-118	95.34	1	1	1	1	1	1	1	1	1	1	1	1	1	1	1	1	1	1	1	1	1	1	0	1	1	1	1	1	1	1	1	0	1	1	1	1	1	1	1	1	1	1	1
ZH-03nov15-155	90.69	1	1	1	1	1	1	1	1	1	1	1	1	1	1	1	1	1	1	1	1	1	1	0	1	1	0	1	1	1	1	1	0	1	1	1	1	1	1	1	1	1	1	0
ZH-03nov15-64	74.41	0	1	1	0	1	1	1	1	0	1	1	1	0	1	1	1	1	1	1	1	1	1	0	0	0	1	1	1	1	1	1	0	0	0	1	1	1	1	0	1	1	1	1
ZH-13may13-156	72.09	1	1	1	1	1	1	0	1	1	0	1	1	1	0	1	1	1	0	1	1	0	1	0	1	0	1	1	1	0	1	1	0	1	0	1	1	0	1	1	1	0	1	1
ZH-13may13-165	30.23	0	1	1	1	0	1	0	0	1	0	0	1	1	0	0	0	0	0	0	0	0	0	0	0	1	0	0	0	0	1	0	0	1	1	0	0	0	0	0	1	0	0	1
ZH-13may13-173	67.44	1	0	0	1	1	1	0	1	1	0	1	1	1	0	1	1	1	0	1	1	0	1	0	1	0	1	1	1	0	1	1	0	1	0	1	1	0	1	1	1	0	1	1
ZH-13nov19-192	86.04	1	1	1	1	1	1	1	1	1	0	1	1	1	1	1	1	0	1	1	1	1	1	0	1	1	1	1	1	0	1	1	0	1	1	1	1	1	1	1	1	0	1	1
ZH-13nov19-250	88.37	1	1	1	1	1	1	1	1	1	1	1	1	1	1	1	1	1	1	1	1	1	1	1	1	1	1	0	1	1	1	1	0	1	1	0	0	1	1	1	1	1	0	1
ZH-3nov15-115	90.69	1	1	1	1	1	1	1	1	1	1	1	1	1	1	1	1	1	1	1	1	1	1	0	1	1	0	1	1	1	1	1	0	1	1	1	1	1	1	1	1	1	1	0
ZH-3nov15-158	95.34	1	1	1	1	1	1	1	1	1	1	1	1	1	1	1	1	1	1	1	1	1	1	0	1	1	1	1	1	1	1	1	0	1	1	1	1	1	1	1	1	1	1	1
ZH-Jul18-129	48.83	1	0	0	0	0	0	0	1	0	1	0	0	0	0	0	0	0	1	1	0	1	1	0	1	0	1	1	1	1	0	1	1	0	0	1	1	0	1	1	1	0	1	1
ZH-Jul18-135	58.13	0	1	1	0	1	1	1	1	1	1	1	1	1	0	0	0	0	0	0	0	0	1	0	1	1	1	0	0	1	1	1	1	1	1	0	0	0	0	1	1	1	0	1
ZH-Jul18-155	88.37	1	1	1	1	1	1	1	1	1	1	1	1	1	1	1	1	1	1	1	1	1	1	0	1	1	1	0	0	0	1	1	1	1	1	1	1	1	1	1	1	1	0	1
ZH-Jul18-167	58.13	0	1	1	0	1	1	1	1	1	1	1	1	1	0	0	0	0	0	0	0	0	1	0	1	1	1	0	0	1	1	1	1	1	1	0	0	0	0	1	1	1	0	1
ZH-Jul18-243	93.02	1	1	1	1	1	1	1	1	1	1	1	1	1	1	1	1	1	1	1	1	1	1	0	1	1	1	0	1	1	1	1	1	1	1	1	1	1	1	1	1	1	0	1
ZH-Jul18-43	46.51	1	0	0	0	0	0	0	1	0	1	0	0	0	0	0	0	0	1	1	0	1	1	0	0	0	1	1	1	1	0	1	1	0	0	1	1	0	1	1	1	0	1	1
ZH-Oct18-36	67.44	0	1	0	1	1	1	1	1	1	1	1	1	1	1	1	1	1	0	0	1	1	1	1	1	1	0	0	1	0	1	1	0	1	0	0	0	1	0	1	1	0	0	1
ZH-Oct18-90	90.69	1	1	1	1	1	1	1	1	1	1	1	1	1	1	1	1	1	0	1	1	1	1	1	1	1	1	1	1	1	1	1	0	1	0	1	1	1	0	1	1	1	1	1
ZH-bin-154	95.34	1	1	1	1	1	1	1	1	1	1	1	1	1	1	1	1	1	1	1	1	1	1	0	1	1	1	1	1	1	1	1	1	1	1	1	1	1	1	1	1	0	1	1
ZH-bin-156	93.02	1	1	1	1	1	1	1	1	1	1	1	1	1	1	1	1	1	1	1	1	1	1	0	0	1	1	1	1	1	1	1	0	1	1	1	1	1	1	1	1	1	1	1

## Sheet: Table_S3
Back to index
Supplementary Table 3. Basic statistics and taxonomy (GTDB, NCBI) for the MAGs assembled in this study.
Lake	Bin	FISH probe	Completeness (default CheckM)	Contamination	Strain_heterogeneity	Assembly length	Estimated_Genome_size	GC	Coding_density	GTDB Taxonomy	NCBI Taxonomy	FISH probe		Lake	Paceibacteria	Gracilibacteria	ABY1	Microgenomatia	Saccharimonadia	Kazan	WWE3	UBA1384	Total
Attersee	AE-03may19-196		40.59	0	0	481207	1185530	41.493	89.76	d__Bacteria;p__Patescibacteria;c__Paceibacteria;o__UBA9983_A;f__;g__;s__	d__Bacteria;p__Candidatus Kaiserbacteria;c__;o__;f__;g__;s__			Attersee	10	2	2	0	0	0	0	0	14
	AE-03may19-31		56.45	0	0	589672	1044591	49.784	92.14	d__Bacteria;p__Patescibacteria;c__Paceibacteria;o__UBA6257;f__UBA11618;g__;s__	d__Bacteria;p__Candidatus Harrisonbacteria;c__;o__;f__;g__;s__			Baikal	29	2	2	2	3	1	0	0	39
	AH-03may19-109		46.59	0	0	491725	1055430	51.744	91.56	d__Bacteria;p__Patescibacteria;c__Paceibacteria;o__UBA9983_A;f__UBA2163;g__;s__	d__Bacteria;p__Candidatus Kaiserbacteria;c__;o__;f__;g__;s__			Biwa	0	0	0	1	1	0	0	0	2
	AH-03may19-119		81.27	0.19	100	802165	985161	42.048	88.17	d__Bacteria;p__Patescibacteria;c__Paceibacteria;o__UBA9983_A;f__;g__;s__	d__Bacteria;p__Candidatus Campbellbacteria;c__;o__;f__;g__;s__			Constance	9	1	2	0	1	0	0	0	13
	AH-03may19-31		76.2	1.23	50	1394790	1807918	48.309	92.3	d__Bacteria;p__Patescibacteria;c__Gracilibacteria;o__Peribacterales;f__Peribacteraceae;g__2-02-FULL-51-10;s__	d__Bacteria;p__Candidatus Peregrinibacteria;c__Candidatus Peribacteria;o__;f__;g__;s__			Greifensee	0	1	0	0	0	0	0	0	1
	AH-03may19-46		71.47	0	0	544022	761189	50.055	92.08	d__Bacteria;p__Patescibacteria;c__Paceibacteria;o__UBA6257;f__UBA11618;g__;s__	d__Bacteria;p__Candidatus Harrisonbacteria;c__;o__;f__;g__;s__			Ikeda	16	2	2	2	0	0	0	0	22
	AH-03may19-69		57.21	0.08	100	578090	1009661	42.791	86.64	d__Bacteria;p__Patescibacteria;c__Paceibacteria;o__UBA9983_A;f__UBA11359;g__;s__	d__Bacteria;p__Candidatus Taylorbacteria;c__;o__;f__;g__;s__			Jiricka	1	0	0	0	1	0	0	0	2
	AH-03may19-8	ABY1a-193	68.32	0	0	891470	1304844	61.294	93.1	d__Bacteria;p__Patescibacteria;c__ABY1;o__SG8-24;f__GWF2-40-263;g__YC12-FULL-57-11;s__	d__Bacteria;p__Candidatus Uhrbacteria;c__;o__;f__;g__;s__	ABY1a-193		Lugano	2	1	0	0	1	0	0	0	4
	AH-24oct19-230		59.52	0	0	661967	1112175	42.762	85.25	d__Bacteria;p__Patescibacteria;c__Paceibacteria;o__UBA9983_A;f__UBA11359;g__;s__	d__Bacteria;p__Candidatus Taylorbacteria;c__;o__;f__;g__;s__			Maggiore	22	10	13	0	2	0	0	0	47
	AH-24oct19-277		76.15	0.86	100	528474	688022	50.101	92	d__Bacteria;p__Patescibacteria;c__Paceibacteria;o__UBA6257;f__UBA11618;g__;s__	d__Bacteria;p__Candidatus Harrisonbacteria;c__;o__;f__;g__;s__			Medard	4	0	1	0	0	0	0	0	5
	AH-24oct19-282		68.32	2.97	33.33	1045282	1484539	44.657	91.67	d__Bacteria;p__Patescibacteria;c__ABY1;o__SG8-24;f__GWF2-40-263;g__;s__	d__Bacteria;p__Candidatus Uhrbacteria;c__;o__;f__;g__;s__			Milada	2	0	1	1	2	0	2	0	8
	AH-24oct19-287		69.28	0.27	0	1355611	1951430	48.139	92.47	d__Bacteria;p__Patescibacteria;c__Gracilibacteria;o__Peribacterales;f__Peribacteraceae;g__2-02-FULL-51-10;s__	d__Bacteria;p__Candidatus Peregrinibacteria;c__Candidatus Peribacteria;o__;f__;g__;s__			Mondsee	1	0	1	0	0	0	0	0	2
	AH-24oct19-37		66.67	0	0	870633	1305884	51.775	90.73	d__Bacteria;p__Patescibacteria;c__Paceibacteria;o__UBA9983_A;f__UBA2163;g__;s__	d__Bacteria;p__Candidatus Kaiserbacteria;c__;o__;f__;g__;s__			Most	5	1	0	1	3	0	0	0	10
	AH-24oct19-52		81.27	0	0	786119	967292	42.089	88.18	d__Bacteria;p__Patescibacteria;c__Paceibacteria;o__UBA9983_A;f__;g__;s__	d__Bacteria;p__Candidatus Wolfebacteria;c__;o__;f__;g__;s__			Rimov	10	0	0	0	28	0	0	0	38
Baikal	Baikal-1250m-152		61.06	0	0	681518	1116144	37.097	94.52	d__Bacteria;p__Patescibacteria;c__Microgenomatia;o__Levybacterales;f__UBA12049;g__;s__	d__Bacteria;p__Candidatus Levybacteria;c__;o__;f__;g__;s__			Thun	15	6	3	3	3	0	3	0	33
	Baikal-1250m-192		76.68	1.12	100	960880	1239069	49.871	88.94	d__Bacteria;p__Patescibacteria;c__Paceibacteria;o__UBA9983_A;f__UBA11359_A;g__UBA10002;s__	d__Bacteria;p__;c__;o__;f__;g__;s__			Traunsee	11	0	4	0	0	0	0	0	15
	Baikal-1250m-222		82.73	0	0	592176	715793	38.302	84.89	d__Bacteria;p__Patescibacteria;c__Paceibacteria;o__UBA9983_A;f__Zambryskibacteraceae;g__C7867-006;s__	d__Bacteria;p__;c__;o__;f__;g__;s__			Zurich	12	3	9	0	2	0	0	1	27
	Baikal-1250m-338		50.95	0	0	364962	716314	50.29	90.76	d__Bacteria;p__Patescibacteria;c__Paceibacteria;o__UBA6257;f__UBA11618;g__;s__	d__Bacteria;p__Candidatus Harrisonbacteria;c__;o__;f__;g__;s__			Sum	149	29	40	10	47	1	5	1	282
	Baikal-1250m-373		62.5	0.08	0	489709	782907	43.229	92.13	d__Bacteria;p__Patescibacteria;c__Saccharimonadia;o__UBA4664;f__;g__;s__	d__Bacteria;p__Candidatus Saccharibacteria;c__;o__;f__;g__;s__
	Baikal-1250m-46		48.98	0	0	463358	946014	39.788	89.03	d__Bacteria;p__Patescibacteria;c__Paceibacteria;o__Paceibacterales;f__Staskawiczbacteraceae;g__2-02-FULL-43-16;s__	d__Bacteria;p__Candidatus Staskawiczbacteria;c__;o__;f__;g__;s__					Completeness	Contamination	Estimated_Genome_size	GC	Coding_density
	Baikal-1350m-104		80.3	0	0	569864	709668	39.234	90.49	d__Bacteria;p__Patescibacteria;c__Paceibacteria;o__UBA9983_A;f__Zambryskibacteraceae;g__;s__	d__Bacteria;p__Candidatus Zambryskibacteria;c__;o__;f__;g__;s__			ABY1 (40)	Min	47.15	0	902377	36.099	88.42
	Baikal-1350m-131		49.64	0	0	516112	1039709	35.025	87.09	d__Bacteria;p__Patescibacteria;c__Paceibacteria;o__Paceibacterales;f__Staskawiczbacteraceae;g__01-FULL-38-12b;s__	d__Bacteria;p__Candidatus Staskawiczbacteria;c__;o__;f__;g__;s__				Max	80.8	2.97	1610421	61.349	94.04
	Baikal-1350m-133		68.44	0.19	100	590116	860600	40.905	90.85	d__Bacteria;p__Patescibacteria;c__Paceibacteria;o__UBA9983_A;f__UBA1006;g__;s__	d__Bacteria;p__Candidatus Campbellbacteria;c__;o__;f__;g__;s__				Average	63.9087	0.87725	1253213	48.4549	92.3315
	Baikal-1350m-162		73.25	0	0	436388	595751	43.845	91.69	d__Bacteria;p__Patescibacteria;c__Paceibacteria;o__UBA9983_A;f__Zambryskibacteraceae;g__UBA5004;s__	d__Bacteria;p__Candidatus Zambryskibacteria;c__;o__;f__;g__;s__				Median	64.945	0.725	1.25e+06	47.095	92.495
	Baikal-1350m-263		68.16	0	0	582710	854914	53.272	92.44	d__Bacteria;p__Patescibacteria;c__Paceibacteria;o__UBA9983_A;f__UBA2163;g__UBA10103;s__	d__Bacteria;p__Candidatus Kaiserbacteria;c__;o__;f__;g__;s__			Gracilibacteria (29)	Min	44.66	0	1053254	24.957	90.72
	Baikal-1350m-280		69.43	0	0	672904	969183	38.561	92.78	d__Bacteria;p__Patescibacteria;c__Paceibacteria;o__UBA9983_A;f__UBA11359;g__;s__	d__Bacteria;p__Candidatus Taylorbacteria;c__;o__;f__;g__;s__				Max	84.65	1.98	2072215	57.121	94.78
	Baikal-1350m-319		67.5	0	0	579640	858725	37.387	87.61	d__Bacteria;p__Patescibacteria;c__Paceibacteria;o__UBA9983_A;f__UBA5272;g__UBA11704;s__	d__Bacteria;p__;c__;o__;f__;g__;s__				Average	74.5214	0.749655	1.47549e+06	43.8741	92.9962
	Baikal-1350m-357		61.35	0.99	100	445855	719545	37.354	92.17	d__Bacteria;p__Patescibacteria;c__Paceibacteria;o__Paceibacterales;f__Staskawiczbacteraceae;g__01-FULL-38-12b;s__	d__Bacteria;p__Candidatus Staskawiczbacteria;c__;o__;f__;g__;s__				Median	77.78	0.92	1435974	45.379	93.08
	Baikal-1350m-369		52.86	0	0	491545	929899	48.493	93.68	d__Bacteria;p__Patescibacteria;c__Paceibacteria;o__UBA9983_A;f__UBA2163;g__C7867-001;s__	d__Bacteria;p__Candidatus Kaiserbacteria;c__;o__;f__;g__;s__			Microgenomatia (10)	Min	61.06	0	1036673	30.878	92.16
	Baikal-1350m-53		80.46	0	0	647881	805221	42.848	88.89	d__Bacteria;p__Patescibacteria;c__Paceibacteria;o__UBA9983_A;f__UBA11359_A;g__;s__	d__Bacteria;p__;c__;o__;f__;g__;s__				Max	73.39	0.99	2011023	45.119	94.72
	Baikal-deep-G183		65.35	0	0	677466	1036673	30.878	93	d__Bacteria;p__Patescibacteria;c__Microgenomatia;o__Levybacterales;f__UBA12049;g__;s__	d__Bacteria;p__Candidatus Levybacteria;c__;o__;f__;g__;s__				Average	66.038	0.297	1426400	37.9281	93.548
	Baikal-deep-G184		62.92	0	0	793660	1261379	39.937	88.73	d__Bacteria;p__Patescibacteria;c__Paceibacteria;o__UBA9983_A;f__UBA11359_A;g__;s__	d__Bacteria;p__;c__;o__;f__;g__;s__				Median	64.965	0	1.40988e+06	38.509	93.485
	Baikal-deep-G185		70.04	0	0	516324	737184	38.387	85.48	d__Bacteria;p__Patescibacteria;c__Paceibacteria;o__UBA9983_A;f__Zambryskibacteraceae;g__C7867-006;s__	d__Bacteria;p__Candidatus Zambryskibacteria;c__;o__;f__;g__;s__			Paceibacteria (149)	Min	39.61	0	490279	31.84	84.87
	Baikal-deep-G186		57.44	1.12	0	439418	756435	36.439	92.67	d__Bacteria;p__Patescibacteria;c__Paceibacteria;o__UBA9983_A;f__UBA9973;g__UBA9973;s__	d__Bacteria;p__Candidatus Nomurabacteria;c__;o__;f__;g__;s__				Max	87.77	3.95	1742279	58.258	95.44
	Baikal-deep-G188		59.15	0	0	539301	911751	34.985	89.83	d__Bacteria;p__Patescibacteria;c__Paceibacteria;o__UBA6257;f__1-14-0-10-40-38;g__;s__	d__Bacteria;p__Candidatus Harrisonbacteria;c__;o__;f__;g__;s__				Average	63.1599	0.736779	964539	44.9054	91.2085
	Baikal-deep-G189		66.02	3.37	0	685593	1003466	38.593	92.92	d__Bacteria;p__Patescibacteria;c__Paceibacteria;o__UBA9983_A;f__UBA11359;g__;s__	d__Bacteria;p__Candidatus Taylorbacteria;c__;o__;f__;g__;s__				Median	62.92	0.07	946014	43.625	91.72
	Baikal-deep-G190		67.13	2.25	50	863049	1256711	49.76	88.99	d__Bacteria;p__Patescibacteria;c__Paceibacteria;o__UBA9983_A;f__UBA11359_A;g__UBA10002;s__	d__Bacteria;p__;c__;o__;f__;g__;s__			Saccharimonadia (47)	Min	25.48	0	650754	37.457	90.32
	Baikal-deep-G191		46.01	1.98	0	422145	899340	39.629	89.5	d__Bacteria;p__Patescibacteria;c__Paceibacteria;o__Paceibacterales;f__Staskawiczbacteraceae;g__2-02-FULL-43-16;s__	d__Bacteria;p__Candidatus Staskawiczbacteria;c__;o__;f__;g__;s__				Max	68.52	2.78	1369428	46.654	94.09
	Baikal-deep-G192		53.24	0	0	429409	806553	46.654	92.01	d__Bacteria;p__Patescibacteria;c__Saccharimonadia;o__UBA4664;f__;g__;s__	d__Bacteria;p__Candidatus Saccharibacteria;c__;o__;f__;g__;s__				Average	53.7898	0.650488	943506	42.3721	92.4368
	Baikal-deep-G193		56.06	0	0	578258	1031498	53.394	91.94	d__Bacteria;p__Patescibacteria;c__Kazan-3B-28;o__;f__;g__;s__	d__Bacteria;p__Candidatus Saccharibacteria;c__;o__;f__;g__;s__				Median	53.24	0.1	886037	42.162	92.64
	Baikal-deep-G194		59.41	0.2	100	958669	1610421	46.545	88.42	d__Bacteria;p__Patescibacteria;c__ABY1;o__Magasanikbacterales;f__GWA2-37-8;g__2-02-FULL-45-10;s__	d__Bacteria;p__Candidatus Magasanikbacteria;c__;o__;f__;g__;s__
	Baikal-deep-G195		43.99	0.95	100	613203	1380717	53.117	93.06	d__Bacteria;p__Patescibacteria;c__Paceibacteria;o__UBA9983_A;f__UBA2163;g__UBA10103;s__	d__Bacteria;p__Candidatus Kaiserbacteria;c__;o__;f__;g__;s__
	Baikal-deep-G196		44.8	0.85	0	687659	1521906	48.338	92.96	d__Bacteria;p__Patescibacteria;c__Paceibacteria;o__UBA9983_A;f__UBA2163;g__C7867-001;s__	d__Bacteria;p__Candidatus Kaiserbacteria;c__;o__;f__;g__;s__
	Baikal-deep-G199		52.87	3.45	0	505351	922860	43.625	89.28	d__Bacteria;p__Patescibacteria;c__Paceibacteria;o__UBA9983_A;f__UBA11359_A;g__;s__	d__Bacteria;p__;c__;o__;f__;g__;s__
	Baikal-deep-G200		45.07	0	0	355986	789851	50.029	91	d__Bacteria;p__Patescibacteria;c__Paceibacteria;o__UBA6257;f__UBA11618;g__;s__	d__Bacteria;p__Candidatus Harrisonbacteria;c__;o__;f__;g__;s__
	Baikal-deep-G202		75.13	0	0	465688	619842	39.373	90.16	d__Bacteria;p__Patescibacteria;c__Paceibacteria;o__UBA9983_A;f__;g__;s__	d__Bacteria;p__Candidatus Zambryskibacteria;c__;o__;f__;g__;s__
	Baikal-deep-G203		55.53	0	0	568805	1024320	56.719	93.51	d__Bacteria;p__Patescibacteria;c__Paceibacteria;o__UBA9983_A;f__UBA2163;g__GWA1-54-10;s__	d__Bacteria;p__Candidatus Adlerbacteria;c__;o__;f__;g__;s__
	Baikal-deep-G206		76.81	0.99	0	1007001	1298049	51.711	93.07	d__Bacteria;p__Patescibacteria;c__Gracilibacteria;o__Peribacterales;f__Peribacteraceae;g__2-02-FULL-51-10;s__	d__Bacteria;p__Candidatus Peregrinibacteria;c__Candidatus Peribacteria;o__;f__;g__;s__
	Baikal-deep-G207		57.92	0	0	445258	768746	43.083	93.28	d__Bacteria;p__Patescibacteria;c__Saccharimonadia;o__UBA4664;f__;g__;s__	d__Bacteria;p__;c__;o__;f__;g__;s__
	Baikal-deep-G209		43.02	2.16	100	622383	1415480	47.67	95.44	d__Bacteria;p__Patescibacteria;c__Paceibacteria;o__Ryanbacterales;f__GWA2-47-10b;g__GWA2-47-10b;s__	d__Bacteria;p__Candidatus Ryanbacteria;c__;o__;f__;g__;s__
	Baikal-deep-G210		68.08	1.72	0	465479	671963	43.822	91.76	d__Bacteria;p__Patescibacteria;c__Paceibacteria;o__UBA9983_A;f__Zambryskibacteraceae;g__UBA5004;s__	d__Bacteria;p__Candidatus Zambryskibacteria;c__;o__;f__;g__;s__
	Baikal-deep-G211		77.78	1.28	50	1062781	1348903	57.121	90.72	d__Bacteria;p__Patescibacteria;c__Gracilibacteria;o__Peribacterales;f__Peribacteraceae;g__;s__	d__Bacteria;p__Candidatus Peregrinibacteria;c__Candidatus Peribacteria;o__;f__;g__;s__
	Baikal-deep-G212		57.81	0	0	831763	1438787	47.199	92.56	d__Bacteria;p__Patescibacteria;c__ABY1;o__SG8-24;f__2-12-FULL-60-25;g__21-14-all-47-17;s__	d__Bacteria;p__Candidatus Uhrbacteria;c__;o__;f__;g__;s__
Biwa	Biwa-bin1		63.25	0	0	656220	1037501	39.143	93.68	d__Bacteria;p__Patescibacteria;c__Saccharimonadia;o__UBA4664;f__;g__;s__	d__Bacteria;p__;c__;o__;f__;g__;s__
	Biwa-bin2		62.38	0	0	806706	1293212	31.539	92.16	d__Bacteria;p__Patescibacteria;c__Microgenomatia;o__Levybacterales;f__UBA12049;g__;s__	d__Bacteria;p__Candidatus Levybacteria;c__;o__;f__;g__;s__
Constance	CH-Jul18-211		76.15	0	0	706882	928275	41.021	85.89	d__Bacteria;p__Patescibacteria;c__Paceibacteria;o__UBA9983_A;f__UBA11359;g__;s__	d__Bacteria;p__Candidatus Taylorbacteria;c__;o__;f__;g__;s__
	CH-Jul18-212		58.05	0	0	443939	764752	39.186	91.57	d__Bacteria;p__Patescibacteria;c__Paceibacteria;o__UBA9983_A;f__;g__;s__	d__Bacteria;p__Candidatus Zambryskibacteria;c__;o__;f__;g__;s__
	CH-Jul18-31		47.3	0	0	396140	837505	43.531	91.73	d__Bacteria;p__Patescibacteria;c__Saccharimonadia;o__Saccharimonadales;f__UBA10212;g__;s__	d__Bacteria;p__Candidatus Saccharibacteria;c__;o__;f__;g__;s__
	CH-Jul18-93		58.73	1.49	100	584295	980059	45.544	92.49	d__Bacteria;p__Patescibacteria;c__ABY1;o__SG8-24;f__UBA9934;g__UBA11707;s__	d__Bacteria;p__Candidatus Uhrbacteria;c__;o__;f__;g__;s__
	CH-Jul18-99		65.36	0.85	0	756785	1148029	52.369	92.54	d__Bacteria;p__Patescibacteria;c__Paceibacteria;o__UBA9983_A;f__UBA2163;g__UBA10103;s__	d__Bacteria;p__Candidatus Kaiserbacteria;c__;o__;f__;g__;s__
	CH-Oct18-100		56.85	1.79	33.33	483372	835038	43.176	89.59	d__Bacteria;p__Patescibacteria;c__Paceibacteria;o__UBA9983_A;f__;g__;s__	d__Bacteria;p__Candidatus Nomurabacteria;c__;o__;f__;g__;s__
	CH-Oct18-118		65.36	1.71	50	829400	1247272	52.289	92.78	d__Bacteria;p__Patescibacteria;c__Paceibacteria;o__UBA9983_A;f__UBA2163;g__UBA10103;s__	d__Bacteria;p__Candidatus Kaiserbacteria;c__;o__;f__;g__;s__
	CH-Oct18-39		71.71	0.93	0	762379	1053254	34.093	93.08	d__Bacteria;p__Patescibacteria;c__Gracilibacteria;o__UBA1369;f__GCA-2718715;g__;s__	d__Bacteria;p__;c__;o__;f__;g__;s__
	CH-Oct18-50		56.73	0.11	0	538877	948852	45.5	93.27	d__Bacteria;p__Patescibacteria;c__ABY1;o__SG8-24;f__UBA9934;g__UBA11707;s__	d__Bacteria;p__Candidatus Uhrbacteria;c__;o__;f__;g__;s__
	CH-Oct18-75		80.54	0	0	756092	938778	41.04	84.87	d__Bacteria;p__Patescibacteria;c__Paceibacteria;o__UBA9983_A;f__UBA11359;g__;s__	d__Bacteria;p__Candidatus Taylorbacteria;c__;o__;f__;g__;s__
	CH-Oct18-76		69.25	0	0	519799	750612	44.068	94.27	d__Bacteria;p__Patescibacteria;c__Paceibacteria;o__Ryanbacterales;f__GWA2-47-10b;g__GWA2-47-10b;s__	d__Bacteria;p__Candidatus Ryanbacteria;c__;o__;f__;g__;s__
	CH-Oct18-95		70.11	0	0	849399	1211523	51.784	90.57	d__Bacteria;p__Patescibacteria;c__Paceibacteria;o__UBA9983_A;f__UBA2163;g__;s__	d__Bacteria;p__Candidatus Kaiserbacteria;c__;o__;f__;g__;s__
	CH-Oct18-96		77.01	3.95	100	513271	640172	39.056	91.08	d__Bacteria;p__Patescibacteria;c__Paceibacteria;o__UBA9983_A;f__;g__;s__	d__Bacteria;p__Candidatus Zambryskibacteria;c__;o__;f__;g__;s__
Greifensee	GH-07nov19-153		74.79	0	0	1549810	2072215	24.957	91.03	d__Bacteria;p__Patescibacteria;c__Gracilibacteria;o__BD1-5;f__UBA6164;g__UBA6164;s__	d__Bacteria;p__;c__;o__;f__;g__;s__
Ikeda	Ike-100m-1		58.51	0	0	622585	1064065	34.824	88.33	d__Bacteria;p__Patescibacteria;c__Paceibacteria;o__Paceibacterales;f__Staskawiczbacteraceae;g__01-FULL-38-12b;s__	d__Bacteria;p__Candidatus Staskawiczbacteria;c__;o__;f__;g__;s__
	Ike-100m-12		71.91	0	0	1202310	1671964	36.965	94.12	d__Bacteria;p__Patescibacteria;c__Microgenomatia;o__Daviesbacterales;f__UBA10151;g__2-02-FULL-36-13;s__	d__Bacteria;p__Candidatus Daviesbacteria;c__;o__;f__;g__;s__
	Ike-100m-2		72.24	0	0	693908	960559	39.285	93.22	d__Bacteria;p__Patescibacteria;c__Paceibacteria;o__UBA9983_A;f__UBA9973;g__UBA9973;s__	d__Bacteria;p__Candidatus Nomurabacteria;c__;o__;f__;g__;s__
	Ike-100m-20		65.46	1.12	0	489039	738713	43.104	93.06	d__Bacteria;p__Patescibacteria;c__Paceibacteria;o__UBA9983_A;f__UBA9973;g__;s__	d__Bacteria;p__Candidatus Nomurabacteria;c__;o__;f__;g__;s__
	Ike-100m-30	Adl1-134	61.08	1.71	50	818771	1317567	51.744	93.79	d__Bacteria;p__Patescibacteria;c__Paceibacteria;o__UBA9983_A;f__UBA2163;g__GWA1-54-10;s__	d__Bacteria;p__Candidatus Adlerbacteria;c__;o__;f__;g__;s__	Adl1-134
	Ike-100m-32		66.04	0.19	0	647329	978345	43.342	90.73	d__Bacteria;p__Patescibacteria;c__Paceibacteria;o__UBA9983_A;f__UBA9973;g__;s__	d__Bacteria;p__Candidatus Nomurabacteria;c__;o__;f__;g__;s__
	Ike-100m-33		52.3	0	0	630259	1205084	48.115	86.72	d__Bacteria;p__Patescibacteria;c__Paceibacteria;o__UBA9983_A;f__UBA9973;g__;s__	d__Bacteria;p__Candidatus Nomurabacteria;c__;o__;f__;g__;s__
	Ike-100m-35		62.72	0	0	525929	838534	50.599	93.04	d__Bacteria;p__Patescibacteria;c__Paceibacteria;o__UBA9983_A;f__UBA9973;g__;s__	d__Bacteria;p__Candidatus Nomurabacteria;c__;o__;f__;g__;s__
	Ike-100m-40		67.35	0	0	830680	1233377	52.068	92.95	d__Bacteria;p__Patescibacteria;c__Paceibacteria;o__UBA9983_A;f__UBA2163;g__UBA10103;s__	d__Bacteria;p__Candidatus Kaiserbacteria;c__;o__;f__;g__;s__
	Ike-100m-41		64.93	1.71	0	802766	1215214	51.175	91.42	d__Bacteria;p__Patescibacteria;c__Paceibacteria;o__UBA9983_A;f__UBA2163;g__;s__	d__Bacteria;p__Candidatus Adlerbacteria;c__;o__;f__;g__;s__
	Ike-150m-21		57.38	0.08	0	621994	1083123	58.258	90.11	d__Bacteria;p__Patescibacteria;c__Paceibacteria;o__UBA6257;f__UBA11618;g__;s__	d__Bacteria;p__Candidatus Harrisonbacteria;c__;o__;f__;g__;s__
	Ike-150m-34		77.21	0	0	646448	837259	35.586	92.37	d__Bacteria;p__Patescibacteria;c__Paceibacteria;o__UBA9983_A;f__UBA9973;g__UBA9973;s__	d__Bacteria;p__Candidatus Nomurabacteria;c__;o__;f__;g__;s__
	Ike-150m-44		80.8	1.23	0	925251	1131027	40.006	92.5	d__Bacteria;p__Patescibacteria;c__ABY1;o__Magasanikbacterales;f__GWA2-37-8;g__;s__	d__Bacteria;p__Candidatus Magasanikbacteria;c__;o__;f__;g__;s__
	Ike-150m-55		57.27	1.65	0	819785	1407820	36.274	90.48	d__Bacteria;p__Patescibacteria;c__Paceibacteria;o__UBA6257;f__1-14-0-10-40-38;g__;s__	d__Bacteria;p__Candidatus Harrisonbacteria;c__;o__;f__;g__;s__
	Ike-200m-19		73.41	0.16	0	575624	782867	41.962	92.07	d__Bacteria;p__Patescibacteria;c__Paceibacteria;o__UBA9983_A;f__UBA9973;g__;s__	d__Bacteria;p__Candidatus Nomurabacteria;c__;o__;f__;g__;s__
	Ike-200m-22		61.69	0.99	0	892709	1432762	45.119	93.77	d__Bacteria;p__Patescibacteria;c__Microgenomatia;o__UBA1400;f__MFAQ01;g__UBA10133;s__	d__Bacteria;p__Candidatus Collierbacteria;c__;o__;f__;g__;s__
	Ike-200m-38		65.64	2.56	0	647947	961851	40.756	92.76	d__Bacteria;p__Patescibacteria;c__Paceibacteria;o__UBA9983_A;f__UBA9973;g__;s__	d__Bacteria;p__Candidatus Nomurabacteria;c__;o__;f__;g__;s__
	Ike-200m-53		81.65	0	0	1083998	1327615	36.573	94.2	d__Bacteria;p__Patescibacteria;c__Gracilibacteria;o__UBA1369;f__LOWO2-01-FULL-3;g__UM-FILTER-38-24;s__	d__Bacteria;p__Candidatus Peregrinibacteria;c__;o__;f__;g__;s__
	Ike-200m-9		60.37	0	0	1051814	1742279	43.833	89.98	d__Bacteria;p__Patescibacteria;c__Paceibacteria;o__UBA9983_A;f__UBA1539;g__;s__	d__Bacteria;p__;c__;o__;f__;g__;s__
	Ike-50m-33	ABY1b-1345	69.69	0	0	938277	1346358	52.411	91	d__Bacteria;p__Patescibacteria;c__ABY1;o__SG8-24;f__UBA9934;g__UBA11707;s__	d__Bacteria;p__Candidatus Uhrbacteria;c__;o__;f__;g__;s__	ABY1b-1345
	Ike-50m-40		72.07	0	0	564087	782693	48.193	91.22	d__Bacteria;p__Patescibacteria;c__Paceibacteria;o__UBA9983_A;f__UBA9973;g__;s__	d__Bacteria;p__Candidatus Nomurabacteria;c__;o__;f__;g__;s__
	Ike-50m-54	Pgri-99	79.7	0.99	0	1155915	1435974	48.858	94.29	d__Bacteria;p__Patescibacteria;c__Gracilibacteria;o__UBA1369;f__2-02-FULL-48-14;g__2-02-FULL-48-14;s__	d__Bacteria;p__Candidatus Peregrinibacteria;c__;o__;f__;g__;s__	Pgri-99
Jiricka	Jr-19feb18-57		54.67	0.14	100	749716	1369428	40.206	92.2	d__Bacteria;p__Patescibacteria;c__Saccharimonadia;o__Saccharimonadales;f__Saccharimonadaceae;g__UBA1547;s__	d__Bacteria;p__Candidatus Saccharibacteria;c__;o__;f__;g__;s__
	Jr-19feb18-67		44.86	0	0	349812	779786	34.027	92.82	d__Bacteria;p__Patescibacteria;c__Paceibacteria;o__UBA9983_A;f__UBA9973;g__UBA9973;s__	d__Bacteria;p__Candidatus Nomurabacteria;c__;o__;f__;g__;s__
Lugano	LH-02apr19-200		57.22	1.71	100	931371	1599868	41.803	89.92	d__Bacteria;p__Patescibacteria;c__Paceibacteria;o__UBA9983_A;f__UBA6899;g__;s__	d__Bacteria;p__;c__;o__;f__;g__;s__
	LH-02apr19-23		45.46	0.43	100	404532	886037	42.259	92.5	d__Bacteria;p__Patescibacteria;c__Saccharimonadia;o__UBA4664;f__;g__;s__	d__Bacteria;p__;c__;o__;f__;g__;s__
	LH-02apr19-231		59.25	0	0	452166	763149	55.985	91.57	d__Bacteria;p__Patescibacteria;c__Paceibacteria;o__UBA9983_A;f__UBA2163;g__C7867-001;s__	d__Bacteria;p__;c__;o__;f__;g__;s__
	LH-05nov19-122		64.14	0	0	1183936	1845862	48.247	91.56	d__Bacteria;p__Patescibacteria;c__Gracilibacteria;o__Peribacterales;f__Peribacteraceae;g__;s__	d__Bacteria;p__Candidatus Peregrinibacteria;c__Candidatus Peribacteria;o__;f__;g__;s__
Maggiore	Mag-100m-18		62.74	0.95	50	988540	1560645	46.345	93.02	d__Bacteria;p__Patescibacteria;c__ABY1;o__Magasanikbacterales;f__2-02-FULL-50-9b;g__2-02-FULL-50-9b;s__	d__Bacteria;p__Candidatus Magasanikbacteria;c__;o__;f__;g__;s__
	Mag-300m-26		39.95	0.99	0	463758	1149353	41.552	91.84	d__Bacteria;p__Patescibacteria;c__Saccharimonadia;o__Saccharimonadales;f__UBA10212;g__;s__	d__Bacteria;p__Candidatus Saccharibacteria;c__;o__;f__;g__;s__
	Mag-300m-37	ABY1a-193	57.13	1.16	0	735179	1271925	46.789	92.74	d__Bacteria;p__Patescibacteria;c__ABY1;o__SG8-24;f__GWF2-40-263;g__YC12-FULL-57-11;s__	d__Bacteria;p__Candidatus Uhrbacteria;c__;o__;f__;g__;s__	ABY1a-193
	Mag-300m-6		39.61	1.69	0	301882	749255	37.712	89.78	d__Bacteria;p__Patescibacteria;c__Paceibacteria;o__UBA9983_A;f__UBA9973;g__;s__	d__Bacteria;p__Candidatus Nomurabacteria;c__;o__;f__;g__;s__
	MaH-04nov19-100		81.57	0.99	0	1013864	1230632	47.192	93.16	d__Bacteria;p__Patescibacteria;c__Gracilibacteria;o__UBA1369;f__UBA12463;g__;s__	d__Bacteria;p__Candidatus Peregrinibacteria;c__;o__;f__;g__;s__
	MaH-04nov19-107		77.01	1.72	0	657225	838749	38.049	88.85	d__Bacteria;p__Patescibacteria;c__Paceibacteria;o__UBA9983_A;f__UBA9973;g__;s__	d__Bacteria;p__Candidatus Nomurabacteria;c__;o__;f__;g__;s__
	MaH-04nov19-108		72.74	0.37	50	921748	1262493	46.742	87.98	d__Bacteria;p__Patescibacteria;c__Paceibacteria;o__UBA9983_A;f__UBA11359_A;g__UBA10002;s__	d__Bacteria;p__;c__;o__;f__;g__;s__
	MaH-04nov19-110		80.69	1.98	0	1142202	1387515	45.463	91.54	d__Bacteria;p__Patescibacteria;c__Gracilibacteria;o__UBA1369;f__UBA12463;g__;s__	d__Bacteria;p__Candidatus Peregrinibacteria;c__;o__;f__;g__;s__
	MaH-04nov19-141		61.94	0.85	0	666019	1066125	52.349	92.8	d__Bacteria;p__Patescibacteria;c__Paceibacteria;o__UBA9983_A;f__UBA2163;g__UBA10103;s__	d__Bacteria;p__Candidatus Kaiserbacteria;c__;o__;f__;g__;s__
	MaH-04nov19-148		53.82	0	0	517075	960748	49.34	94.83	d__Bacteria;p__Patescibacteria;c__Paceibacteria;o__UBA9983_A;f__UBA2163;g__C7867-001;s__	d__Bacteria;p__Candidatus Kaiserbacteria;c__;o__;f__;g__;s__
	MaH-04nov19-177		70	0.93	0	1164754	1648459	51.346	91.89	d__Bacteria;p__Patescibacteria;c__Gracilibacteria;o__Peribacterales;f__Peribacteraceae;g__2-12-FULL-55-11;s__	d__Bacteria;p__Candidatus Peregrinibacteria;c__Candidatus Peribacteria;o__;f__;g__;s__
	MaH-04nov19-190		54.4	1.98	0	750078	1351519	46.358	93.06	d__Bacteria;p__Patescibacteria;c__ABY1;o__Magasanikbacterales;f__2-02-FULL-50-9b;g__2-02-FULL-50-9b;s__	d__Bacteria;p__Candidatus Magasanikbacteria;c__;o__;f__;g__;s__
	MaH-04nov19-192	ABY1b-1345	66.34	1.98	0	790734	1168341	51.114	92.94	d__Bacteria;p__Patescibacteria;c__ABY1;o__SG8-24;f__UBA9934;g__UBA11707;s__	d__Bacteria;p__Candidatus Uhrbacteria;c__;o__;f__;g__;s__	ABY1b-1345
	MaH-04nov19-195		63.7	0.46	100	609297	952110	35.918	90.59	d__Bacteria;p__Patescibacteria;c__Paceibacteria;o__2-02-FULL-40-12;f__;g__;s__	d__Bacteria;p__Candidatus Terrybacteria;c__;o__;f__;g__;s__
	MaH-04nov19-197		60.94	1.71	50	575157	927669	55.204	93.88	d__Bacteria;p__Patescibacteria;c__Paceibacteria;o__UBA9983_A;f__UBA2163;g__GWA1-54-10;s__	d__Bacteria;p__Candidatus Adlerbacteria;c__;o__;f__;g__;s__
	MaH-04nov19-216		79.28	1.72	0	616971	764832	38.159	91.32	d__Bacteria;p__Patescibacteria;c__Paceibacteria;o__UBA9983_A;f__UBA9973;g__UBA9973;s__	d__Bacteria;p__Candidatus Nomurabacteria;c__;o__;f__;g__;s__
	MaH-04nov19-253		50.77	0	0	678666	1336746	51.805	91.05	d__Bacteria;p__Patescibacteria;c__ABY1;o__SG8-24;f__2-12-FULL-57-11;g__;s__	d__Bacteria;p__Candidatus Uhrbacteria;c__;o__;f__;g__;s__
	MaH-04nov19-275		83.66	0.99	0	1245729	1474296	50.861	93.3	d__Bacteria;p__Patescibacteria;c__Gracilibacteria;o__Peribacterales;f__Peribacteraceae;g__;s__	d__Bacteria;p__Candidatus Peregrinibacteria;c__Candidatus Peribacteria;o__;f__;g__;s__
	MaH-04nov19-280	ABY1a-193	69.31	0.09	100	1071164	1544077	46.991	92	d__Bacteria;p__Patescibacteria;c__ABY1;o__SG8-24;f__GWF2-40-263;g__YC12-FULL-57-11;s__	d__Bacteria;p__Candidatus Uhrbacteria;c__;o__;f__;g__;s__	ABY1a-193
	MaH-04nov19-39		71.04	0.92	0	919905	1282998	35.865	94.11	d__Bacteria;p__Patescibacteria;c__Gracilibacteria;o__UBA1369;f__LOWO2-01-FULL-3;g__UM-FILTER-38-24;s__	d__Bacteria;p__Candidatus Peregrinibacteria;c__;o__;f__;g__;s__
	MaH-04nov19-42	Pgri-99	81.68	0	0	1246678	1526295	50.284	94.21	d__Bacteria;p__Patescibacteria;c__Gracilibacteria;o__UBA1369;f__2-02-FULL-48-14;g__2-02-FULL-48-14;s__	d__Bacteria;p__Candidatus Peregrinibacteria;c__;o__;f__;g__;s__	Pgri-99
	MaH-04nov19-6	ABY1b-1345	69.8	0.5	100	949427	1353409	49.106	91.74	d__Bacteria;p__Patescibacteria;c__ABY1;o__SG8-24;f__UBA9934;g__UBA11707;s__	d__Bacteria;p__Candidatus Uhrbacteria;c__;o__;f__;g__;s__	ABY1b-1345
	MaH-04nov19-71		75.11	1.69	50	919872	1204002	47.971	88.01	d__Bacteria;p__Patescibacteria;c__Paceibacteria;o__UBA9983_A;f__UBA11359_A;g__UBA10002;s__	d__Bacteria;p__;c__;o__;f__;g__;s__
	MaH-04nov19-74		78.55	1.12	0	932867	1174307	36.099	92.6	d__Bacteria;p__Patescibacteria;c__ABY1;o__Magasanikbacterales;f__GWA2-37-8;g__;s__	d__Bacteria;p__Candidatus Magasanikbacteria;c__;o__;f__;g__;s__
	MaH-04nov19-81		69.2	2.14	0	998055	1411411	55.088	92.84	d__Bacteria;p__Patescibacteria;c__Paceibacteria;o__UBA9983_A;f__UBA2163;g__UBA10103;s__	d__Bacteria;p__Candidatus Kaiserbacteria;c__;o__;f__;g__;s__
	MaH-04nov19-96		74.48	2.62	33.33	693433	906639	41.964	94.01	d__Bacteria;p__Patescibacteria;c__Paceibacteria;o__UBA9983_A;f__UBA9973;g__UBA9973;s__	d__Bacteria;p__Candidatus Nomurabacteria;c__;o__;f__;g__;s__
	MaH-04nov19-97		72.54	0	0	538663	742573	42.152	93.82	d__Bacteria;p__Patescibacteria;c__Paceibacteria;o__UBA9983_A;f__UBA11359;g__PALSA-1337;s__	d__Bacteria;p__Candidatus Taylorbacteria;c__;o__;f__;g__;s__
	MaH-09apr19-126		54.67	0	0	533899	976584	49.175	94.43	d__Bacteria;p__Patescibacteria;c__Paceibacteria;o__UBA9983_A;f__UBA2163;g__C7867-001;s__	d__Bacteria;p__Candidatus Kaiserbacteria;c__;o__;f__;g__;s__
	MaH-09apr19-135		71.13	1.72	0	664488	918120	41.937	93.61	d__Bacteria;p__Patescibacteria;c__Paceibacteria;o__UBA9983_A;f__UBA9973;g__UBA9973;s__	d__Bacteria;p__Candidatus Nomurabacteria;c__;o__;f__;g__;s__
	MaH-09apr19-142		63.7	0	0	591612	928747	35.881	90.86	d__Bacteria;p__Patescibacteria;c__Paceibacteria;o__2-02-FULL-40-12;f__;g__;s__	d__Bacteria;p__Candidatus Terrybacteria;c__;o__;f__;g__;s__
	MaH-09apr19-161		59.41	0.85	0	675984	1128157	52.343	92.84	d__Bacteria;p__Patescibacteria;c__Paceibacteria;o__UBA9983_A;f__UBA2163;g__UBA10103;s__	d__Bacteria;p__Candidatus Kaiserbacteria;c__;o__;f__;g__;s__
	MaH-09apr19-163		58.12	1.72	0	629781	1064949	46.823	88.6	d__Bacteria;p__Patescibacteria;c__Paceibacteria;o__UBA9983_A;f__UBA11359_A;g__UBA10002;s__	d__Bacteria;p__;c__;o__;f__;g__;s__
	MaH-09apr19-169		82.67	1.98	50	1210241	1434956	50.851	93.45	d__Bacteria;p__Patescibacteria;c__Gracilibacteria;o__Peribacterales;f__Peribacteraceae;g__;s__	d__Bacteria;p__Candidatus Peregrinibacteria;c__Candidatus Peribacteria;o__;f__;g__;s__
	MaH-09apr19-170		52.01	0	0	375916	722776	41.84	93.66	d__Bacteria;p__Patescibacteria;c__Paceibacteria;o__UBA9983_A;f__UBA11359;g__PALSA-1337;s__	d__Bacteria;p__Candidatus Taylorbacteria;c__;o__;f__;g__;s__
	MaH-09apr19-187		57.57	0.93	100	994960	1712188	51.237	92.61	d__Bacteria;p__Patescibacteria;c__Gracilibacteria;o__Peribacterales;f__Peribacteraceae;g__2-12-FULL-55-11;s__	d__Bacteria;p__Candidatus Peregrinibacteria;c__Candidatus Peribacteria;o__;f__;g__;s__
	MaH-09apr19-21	ABY1b-1345	70.3	0	0	732051	1041324	49.645	91.54	d__Bacteria;p__Patescibacteria;c__ABY1;o__SG8-24;f__UBA9934;g__UBA11707;s__	d__Bacteria;p__Candidatus Uhrbacteria;c__;o__;f__;g__;s__	ABY1b-1345
	MaH-09apr19-211		70.55	0	0	779823	1105347	55.255	92.89	d__Bacteria;p__Patescibacteria;c__Paceibacteria;o__UBA9983_A;f__UBA2163;g__UBA10103;s__	d__Bacteria;p__Candidatus Kaiserbacteria;c__;o__;f__;g__;s__
	MaH-09apr19-218	ABY1b-1345	62.38	2.07	25	884962	1389296	49.273	92.04	d__Bacteria;p__Patescibacteria;c__ABY1;o__SG8-24;f__UBA9934;g__UBA11707;s__	d__Bacteria;p__Candidatus Uhrbacteria;c__;o__;f__;g__;s__	ABY1b-1345
	MaH-09apr19-23	Adl2-132	60.51	0	0	582160	962088	55.142	93.85	d__Bacteria;p__Patescibacteria;c__Paceibacteria;o__UBA9983_A;f__UBA2163;g__GWA1-54-10;s__	d__Bacteria;p__Candidatus Adlerbacteria;c__;o__;f__;g__;s__	Adl2-132
	MaH-09apr19-231		47.84	0	0	378608	791404	46.613	92.46	d__Bacteria;p__Patescibacteria;c__Saccharimonadia;o__UBA4664;f__;g__;s__	d__Bacteria;p__;c__;o__;f__;g__;s__
	MaH-09apr19-234	Pgri-99	80.2	0	0	1215056	1515032	50.408	94.14	d__Bacteria;p__Patescibacteria;c__Gracilibacteria;o__UBA1369;f__2-02-FULL-48-14;g__2-02-FULL-48-14;s__	d__Bacteria;p__Candidatus Peregrinibacteria;c__;o__;f__;g__;s__	Pgri-99
	MaH-09apr19-248		79.28	0	0	594114	749386	38.268	91.22	d__Bacteria;p__Patescibacteria;c__Paceibacteria;o__UBA9983_A;f__UBA9973;g__UBA9973;s__	d__Bacteria;p__Candidatus Nomurabacteria;c__;o__;f__;g__;s__
	MaH-09apr19-252		51.38	0	0	738477	1437284	51.787	91.34	d__Bacteria;p__Patescibacteria;c__ABY1;o__SG8-24;f__2-12-FULL-57-11;g__;s__	d__Bacteria;p__Candidatus Uhrbacteria;c__;o__;f__;g__;s__
	MaH-09apr19-3		65.13	1.98	0	788679	1186954	51.131	92.93	d__Bacteria;p__Patescibacteria;c__ABY1;o__SG8-24;f__UBA9934;g__UBA11707;s__	d__Bacteria;p__Candidatus Uhrbacteria;c__;o__;f__;g__;s__
	MaH-09apr19-65	ABY1a-193	69.31	0.99	0	1086057	1551442	46.89	92.27	d__Bacteria;p__Patescibacteria;c__ABY1;o__SG8-24;f__GWF2-40-263;g__YC12-FULL-57-11;s__	d__Bacteria;p__Candidatus Uhrbacteria;c__;o__;f__;g__;s__	ABY1a-193
	MaH-09apr19-83		69.16	1.98	0	933183	1322593	45.379	92.25	d__Bacteria;p__Patescibacteria;c__Gracilibacteria;o__UBA1369;f__UBA12463;g__;s__	d__Bacteria;p__Candidatus Peregrinibacteria;c__;o__;f__;g__;s__
	MaH-09apr19-90		40.35	1.71	100	467234	1138151	53.384	93.12	d__Bacteria;p__Patescibacteria;c__Paceibacteria;o__UBA9983_A;f__UBA2163;g__GWA1-54-10;s__	d__Bacteria;p__Candidatus Adlerbacteria;c__;o__;f__;g__;s__
Medard	ME-08apr19-244		59.23	0.43	100	608660	1023202	51.527	91.74	d__Bacteria;p__Patescibacteria;c__Paceibacteria;o__UBA9983_A;f__UBA2163;g__GWA1-54-10;s__	d__Bacteria;p__Candidatus Adlerbacteria;c__;o__;f__;g__;s__
	MH-08apr19-36		45.51	0.17	100	407688	894297	51.512	91.82	d__Bacteria;p__Patescibacteria;c__Paceibacteria;o__UBA9983_A;f__UBA2163;g__GWA1-54-10;s__	d__Bacteria;p__Candidatus Adlerbacteria;c__;o__;f__;g__;s__
	MH-09jul19-147	Adl2-132	63.5	0	0	664329	1046187	51.416	91.58	d__Bacteria;p__Patescibacteria;c__Paceibacteria;o__UBA9983_A;f__UBA2163;g__GWA1-54-10;s__	d__Bacteria;p__Candidatus Adlerbacteria;c__;o__;f__;g__;s__	Adl2-132
	MH-21oct19-172	Adl2-132	60.09	0	0	677795	1127966	51.397	91.59	d__Bacteria;p__Patescibacteria;c__Paceibacteria;o__UBA9983_A;f__UBA2163;g__GWA1-54-10;s__	d__Bacteria;p__Candidatus Adlerbacteria;c__;o__;f__;g__;s__	Adl2-132
	MH-21oct19-248		47.15	0	0	425471	902377	40.142	94.04	d__Bacteria;p__Patescibacteria;c__ABY1;o__Magasanikbacterales;f__UBA922;g__2-12-FULL-41-16;s__	d__Bacteria;p__Candidatus Magasanikbacteria;c__;o__;f__;g__;s__
Milada	MiE-14oct19-109		80.46	2.59	0	685622	830057	35.844	90.77	d__Bacteria;p__Patescibacteria;c__Paceibacteria;o__UBA9983_A;f__;g__;s__	d__Bacteria;p__Candidatus Campbellbacteria;c__;o__;f__;g__;s__
	MiE-16apr19-201		51.42	1.71	0	508054	971151	33.273	95.24	d__Bacteria;p__Patescibacteria;c__WWE3;o__UBA101185;f__UBA10185;g__;s__	d__Bacteria;p__candidate division WWE3;c__;o__;f__;g__;s__
	MiE-16apr19-257		58.12	0	0	398658	685922	41.148	93.03	d__Bacteria;p__Patescibacteria;c__Saccharimonadia;o__UBA4664;f__;g__;s__	d__Bacteria;p__Candidatus Saccharibacteria;c__;o__;f__;g__;s__
	MiH-14oct19-109		73.39	0	0	1014413	1382222	38.071	93.61	d__Bacteria;p__Patescibacteria;c__Microgenomatia;o__UBA1400;f__PJMF01;g__UBA1364;s__	d__Bacteria;p__Candidatus Pacebacteria;c__;o__;f__;g__;s__
	MiH-14oct19-129		57.62	2.56	100	627042	1060377	43.986	92.57	d__Bacteria;p__Patescibacteria;c__Paceibacteria;o__UBA9983_A;f__UBA9973;g__;s__	d__Bacteria;p__Candidatus Nomurabacteria;c__;o__;f__;g__;s__
	MiH-14oct19-207		63.74	0	0	727173	1140842	45.929	93.35	d__Bacteria;p__Patescibacteria;c__ABY1;o__Magasanikbacterales;f__2-02-FULL-50-9b;g__2-02-FULL-50-9b;s__	d__Bacteria;p__Candidatus Magasanikbacteria;c__;o__;f__;g__;s__
	MiH-16apr19-11		67.95	1.72	0	464731	672167	33.221	95.06	d__Bacteria;p__Patescibacteria;c__WWE3;o__UBA101185;f__UBA10185;g__;s__	d__Bacteria;p__candidate division WWE3;c__;o__;f__;g__;s__
	MiH-16apr19-251		51.94	0	0	396338	763068	41.214	93.1	d__Bacteria;p__Patescibacteria;c__Saccharimonadia;o__UBA4664;f__;g__;s__	d__Bacteria;p__;c__;o__;f__;g__;s__
Mondsee	MoH-23oct19-148	Adl2-132	73.57	0.07	0	611170	830151	48.468	92.31	d__Bacteria;p__Patescibacteria;c__Paceibacteria;o__UBA9983_A;f__UBA2163;g__GWA1-54-10;s__	d__Bacteria;p__Candidatus Adlerbacteria;c__;o__;f__;g__;s__	Adl2-132
	MoH-23oct19-239	ABY1a-193	73.27	1.49	0	1054919	1418316	60.613	92.06	d__Bacteria;p__Patescibacteria;c__ABY1;o__SG8-24;f__GWF2-40-263;g__YC12-FULL-57-11;s__	d__Bacteria;p__Candidatus Uhrbacteria;c__;o__;f__;g__;s__	ABY1a-193
Most	MsE-30apr19-136		43.28	0.52	0	396734	911901	51.393	92.28	d__Bacteria;p__Patescibacteria;c__Paceibacteria;o__UBA9983_A;f__UBA2163;g__GWA1-54-10;s__	d__Bacteria;p__Candidatus Adlerbacteria;c__;o__;f__;g__;s__
	MsH-01oct19-133		61.4	0.99	0	1247115	2011023	41.226	92.89	d__Bacteria;p__Patescibacteria;c__Microgenomatia;o__UBA1400;f__MFAQ01;g__UBA10133;s__	d__Bacteria;p__Candidatus Collierbacteria;c__;o__;f__;g__;s__
	MsH-01oct19-19	SacA-77	62.99	0	0	693851	1101525	42.162	90.54	d__Bacteria;p__Patescibacteria;c__Saccharimonadia;o__Saccharimonadales;f__UBA10212;g__;s__	d__Bacteria;p__Candidatus Saccharibacteria;c__;o__;f__;g__;s__	SacA-77
	MsH-01oct19-288		68.52	0	0	731872	1068114	40.464	92.72	d__Bacteria;p__Patescibacteria;c__Saccharimonadia;o__Saccharimonadales;f__UBA10212;g__;s__	d__Bacteria;p__Candidatus Saccharibacteria;c__;o__;f__;g__;s__
	MsH-01oct19-81		58.92	0.47	66.67	448352	757373	43.509	92.68	d__Bacteria;p__Patescibacteria;c__Paceibacteria;o__UBA9983_A;f__;g__;s__	d__Bacteria;p__Candidatus Zambryskibacteria;c__;o__;f__;g__;s__
	MsH-01oct19-87	Adl2-132	56.44	0.43	0	561792	991099	48.714	92.31	d__Bacteria;p__Patescibacteria;c__Paceibacteria;o__UBA9983_A;f__UBA2163;g__GWA1-54-10;s__	d__Bacteria;p__Candidatus Adlerbacteria;c__;o__;f__;g__;s__	Adl2-132
	MsH-01oct19-93		55.93	0	0	569435	1018120	51.531	91.54	d__Bacteria;p__Patescibacteria;c__Paceibacteria;o__UBA9983_A;f__UBA2163;g__GWA1-54-10;s__	d__Bacteria;p__Candidatus Adlerbacteria;c__;o__;f__;g__;s__
	MsH-30apr19-258		59.14	0	0	777341	1314408	38.362	90.9	d__Bacteria;p__Patescibacteria;c__Gracilibacteria;o__BD1-5;f__UBA6164;g__UBA1545;s__	d__Bacteria;p__Candidatus Gracilibacteria;c__;o__;f__;g__;s__
	MsH-30apr19-336	Adl2-132	63.43	0.71	66.67	626065	980009	51.406	91.5	d__Bacteria;p__Patescibacteria;c__Paceibacteria;o__UBA9983_A;f__UBA2163;g__GWA1-54-10;s__	d__Bacteria;p__Candidatus Adlerbacteria;c__;o__;f__;g__;s__	Adl2-132
	MsH-30jul19-11		68.52	0	0	752352	1098003	40.427	92.47	d__Bacteria;p__Patescibacteria;c__Saccharimonadia;o__Saccharimonadales;f__UBA10212;g__;s__	d__Bacteria;p__Candidatus Saccharibacteria;c__;o__;f__;g__;s__
Rimov	RE-15aug16-192		80.62	3.76	75	723481	863654	51.762	89.59	d__Bacteria;p__Patescibacteria;c__Paceibacteria;o__UBA9983_A;f__UBA2163;g__OLB19;s__	d__Bacteria;p__;c__;o__;f__;g__;s__
	RE-20apr16-173		48.22	0	0	422696	876598	42.225	92.75	d__Bacteria;p__Patescibacteria;c__Saccharimonadia;o__Saccharimonadales;f__UBA10212;g__;s__	d__Bacteria;p__Candidatus Saccharibacteria;c__;o__;f__;g__;s__
	RE-4nov15-20		56.49	2.25	66.67	584793	1011922	38.962	90.13	d__Bacteria;p__Patescibacteria;c__Paceibacteria;o__UBA9983_A;f__GWA1-40-21;g__;s__	d__Bacteria;p__;c__;o__;f__;g__;s__
	RE-4nov15-362		55.7	0.37	0	540383	966577	33.755	92.22	d__Bacteria;p__Patescibacteria;c__Paceibacteria;o__UBA9983_A;f__UBA9973;g__;s__	d__Bacteria;p__Candidatus Nomurabacteria;c__;o__;f__;g__;s__
	RH-14apr17-375		57.36	2.08	66.67	494710	844525	42.197	93.18	d__Bacteria;p__Patescibacteria;c__Saccharimonadia;o__Saccharimonadales;f__UBA10212;g__;s__	d__Bacteria;p__Candidatus Saccharibacteria;c__;o__;f__;g__;s__
	RH-14apr17-556		55.5	0.92	0	502315	896745	45.687	92.19	d__Bacteria;p__Patescibacteria;c__Saccharimonadia;o__UBA4664;f__;g__;s__	d__Bacteria;p__Candidatus Saccharibacteria;c__;o__;f__;g__;s__
	RH-15aug16-101		47.76	3.45	100	464689	939399	40.916	89.96	d__Bacteria;p__Patescibacteria;c__Paceibacteria;o__UBA9983_A;f__UBA9973;g__;s__	d__Bacteria;p__Candidatus Nomurabacteria;c__;o__;f__;g__;s__
	RH-15aug16-19		58.02	0.93	0	558477	953607	42.449	93.09	d__Bacteria;p__Patescibacteria;c__Saccharimonadia;o__Saccharimonadales;f__UBA10212;g__;s__	d__Bacteria;p__Candidatus Saccharibacteria;c__;o__;f__;g__;s__
	RH-15aug16-383	SacA-77	51.28	2.25	100	535777	1021298	41.621	90.38	d__Bacteria;p__Patescibacteria;c__Saccharimonadia;o__Saccharimonadales;f__UBA10212;g__;s__	d__Bacteria;p__Candidatus Saccharibacteria;c__;o__;f__;g__;s__	SacA-77
	RH-18aug17-140		61.39	0.09	100	524918	854285	45.579	92.64	d__Bacteria;p__Patescibacteria;c__Saccharimonadia;o__UBA4664;f__;g__;s__	d__Bacteria;p__;c__;o__;f__;g__;s__
	RH-18aug17-291		39.87	0.93	0	447464	1111870	40.674	93.36	d__Bacteria;p__Patescibacteria;c__Saccharimonadia;o__Saccharimonadales;f__2-12-FULL-41-12;g__;s__	d__Bacteria;p__Candidatus Saccharibacteria;c__;o__;f__;g__;s__
	RH-18aug17-293		37.33	0	0	458529	1228312	41.142	91.17	d__Bacteria;p__Patescibacteria;c__Saccharimonadia;o__Saccharimonadales;f__UBA10212;g__;s__	d__Bacteria;p__Candidatus Saccharibacteria;c__;o__;f__;g__;s__
	RH-18aug17-358		51.45	0.1	100	434107	842901	42.102	93.08	d__Bacteria;p__Patescibacteria;c__Saccharimonadia;o__Saccharimonadales;f__UBA10212;g__;s__	d__Bacteria;p__Candidatus Saccharibacteria;c__;o__;f__;g__;s__
	RH-20apr16-175		46.94	0.92	0	401064	846557	45.746	92.69	d__Bacteria;p__Patescibacteria;c__Saccharimonadia;o__UBA4664;f__;g__;s__	d__Bacteria;p__;c__;o__;f__;g__;s__
	RH-20apr16-307		46.63	1.7	100	612024	1290198	41.465	90.77	d__Bacteria;p__Patescibacteria;c__Saccharimonadia;o__Saccharimonadales;f__UBA10212;g__;s__	d__Bacteria;p__Candidatus Saccharibacteria;c__;o__;f__;g__;s__
	RH-20apr16-349		64.51	0.93	0	639318	981820	42.395	92.49	d__Bacteria;p__Patescibacteria;c__Saccharimonadia;o__Saccharimonadales;f__UBA10212;g__;s__	d__Bacteria;p__Candidatus Saccharibacteria;c__;o__;f__;g__;s__
	RH-20apr16-362		48.89	1.01	100	436285	883367	42.251	92.64	d__Bacteria;p__Patescibacteria;c__Saccharimonadia;o__UBA4664;f__;g__;s__	d__Bacteria;p__;c__;o__;f__;g__;s__
	RH-23may17-1		60.8	2.78	66.67	451560	722050	42.197	93.23	d__Bacteria;p__Patescibacteria;c__Saccharimonadia;o__Saccharimonadales;f__UBA10212;g__;s__	d__Bacteria;p__Candidatus Saccharibacteria;c__;o__;f__;g__;s__
	RH-23may17-1099		73.2	0.13	50	557864	761118	38.62	93.65	d__Bacteria;p__Patescibacteria;c__Paceibacteria;o__UBA9983_A;f__UBA9973;g__;s__	d__Bacteria;p__Candidatus Nomurabacteria;c__;o__;f__;g__;s__
	RH-23may17-1275		61.99	0	0	589801	951445	40.62	92.85	d__Bacteria;p__Patescibacteria;c__Saccharimonadia;o__Saccharimonadales;f__2-12-FULL-41-12;g__;s__	d__Bacteria;p__Candidatus Saccharibacteria;c__;o__;f__;g__;s__
	RH-23may17-1289		58.8	0.93	0	497887	838871	45.72	92.37	d__Bacteria;p__Patescibacteria;c__Saccharimonadia;o__UBA4664;f__;g__;s__	d__Bacteria;p__;c__;o__;f__;g__;s__
	RH-23may17-197		54.7	0.93	100	621558	1125735	41.558	90.94	d__Bacteria;p__Patescibacteria;c__Saccharimonadia;o__Saccharimonadales;f__UBA10212;g__;s__	d__Bacteria;p__Candidatus Saccharibacteria;c__;o__;f__;g__;s__
	RH-23may17-223		42.53	0	0	436726	1026865	40.378	92.8	d__Bacteria;p__Patescibacteria;c__Paceibacteria;o__UBA9983_A;f__UBA11359;g__PALSA-1337;s__	d__Bacteria;p__Candidatus Taylorbacteria;c__;o__;f__;g__;s__
	RH-23may17-261		55.17	0	0	508723	922100	37.457	93.21	d__Bacteria;p__Patescibacteria;c__Saccharimonadia;o__Saccharimonadales;f__SZUA-47;g__;s__	d__Bacteria;p__Candidatus Saccharibacteria;c__;o__;f__;g__;s__
	RH-23may17-429		62.57	1.89	83.33	572655	897925	40.863	89.3	d__Bacteria;p__Patescibacteria;c__Paceibacteria;o__UBA9983_A;f__UBA9973;g__;s__	d__Bacteria;p__Candidatus Nomurabacteria;c__;o__;f__;g__;s__
	RH-23may17-877		39.95	0.08	100	387193	968418	50.348	92.72	d__Bacteria;p__Patescibacteria;c__Paceibacteria;o__UBA9983_A;f__UBA2163;g__C7867-001;s__	d__Bacteria;p__;c__;o__;f__;g__;s__
	RH-23may17-878		72.7	0	0	644133	886015	35.386	92.18	d__Bacteria;p__Patescibacteria;c__Paceibacteria;o__UBA9983_A;f__UBA11359;g__PALSA-1337;s__	d__Bacteria;p__Candidatus Taylorbacteria;c__;o__;f__;g__;s__
	RH-26jul17-192		53.42	2.56	100	661938	1207398	41.584	91.2	d__Bacteria;p__Patescibacteria;c__Saccharimonadia;o__Saccharimonadales;f__UBA10212;g__;s__	d__Bacteria;p__Candidatus Saccharibacteria;c__;o__;f__;g__;s__
	RH-26jul17-250		46.47	0	0	481608	1036384	40.873	93.7	d__Bacteria;p__Patescibacteria;c__Saccharimonadia;o__Saccharimonadales;f__UBA10212;g__;s__	d__Bacteria;p__Candidatus Saccharibacteria;c__;o__;f__;g__;s__
	RH-26jul17-300		46.43	0	0	464130	999633	41.93	93	d__Bacteria;p__Patescibacteria;c__Saccharimonadia;o__Saccharimonadales;f__UBA10212;g__;s__	d__Bacteria;p__Candidatus Saccharibacteria;c__;o__;f__;g__;s__
	RH-26jul17-60		47.05	0.93	0	309054	650754	42.029	92.76	d__Bacteria;p__Patescibacteria;c__Saccharimonadia;o__UBA4664;f__;g__;s__	d__Bacteria;p__;c__;o__;f__;g__;s__
	RH-26jul17-99		63.3	0.92	0	606730	949681	45.341	91.86	d__Bacteria;p__Patescibacteria;c__Saccharimonadia;o__UBA4664;f__;g__;s__	d__Bacteria;p__Candidatus Saccharibacteria;c__;o__;f__;g__;s__
	RH-27jun17-110		46.67	0	0	367976	788463	41.975	91.93	d__Bacteria;p__Patescibacteria;c__Saccharimonadia;o__UBA4664;f__;g__;s__	d__Bacteria;p__;c__;o__;f__;g__;s__
	RH-27jun17-134		52.78	0	0	487304	923273	42.154	93.82	d__Bacteria;p__Patescibacteria;c__Saccharimonadia;o__Saccharimonadales;f__UBA10212;g__;s__	d__Bacteria;p__Candidatus Saccharibacteria;c__;o__;f__;g__;s__
	RH-27jun17-331		53.24	2.14	50	516112	948661	40.667	92.97	d__Bacteria;p__Patescibacteria;c__Saccharimonadia;o__Saccharimonadales;f__UBA10212;g__;s__	d__Bacteria;p__Candidatus Saccharibacteria;c__;o__;f__;g__;s__
	RH-27jun17-373		54.95	1.98	50	471553	841157	45.933	91.95	d__Bacteria;p__Patescibacteria;c__Saccharimonadia;o__UBA4664;f__;g__;s__	d__Bacteria;p__;c__;o__;f__;g__;s__
	RH-27jun17-64		50.51	1.39	50	691999	1350980	41.548	90.32	d__Bacteria;p__Patescibacteria;c__Saccharimonadia;o__Saccharimonadales;f__UBA10212;g__;s__	d__Bacteria;p__Candidatus Saccharibacteria;c__;o__;f__;g__;s__
	RH-9nov16-150		73.77	0	0	719351	975126	38.352	92.61	d__Bacteria;p__Patescibacteria;c__Paceibacteria;o__UBA9983_A;f__UBA9973;g__;s__	d__Bacteria;p__Candidatus Nomurabacteria;c__;o__;f__;g__;s__
Thun	TE-08apr19-119		67.6	3.37	66.67	631962	903350	42.832	85.96	d__Bacteria;p__Patescibacteria;c__Paceibacteria;o__UBA9983_A;f__UBA11359;g__;s__	d__Bacteria;p__Candidatus Taylorbacteria;c__;o__;f__;g__;s__
	TH-08apr19-104		52.61	0.43	0	506919	959397	55.173	94.8	d__Bacteria;p__Patescibacteria;c__Paceibacteria;o__UBA9983_A;f__UBA2163;g__GWA1-54-10;s__	d__Bacteria;p__Candidatus Adlerbacteria;c__;o__;f__;g__;s__
	TH-08apr19-126		41.2	0	0	335991	815512	46.644	93.01	d__Bacteria;p__Patescibacteria;c__Saccharimonadia;o__UBA4664;f__;g__;s__	d__Bacteria;p__Candidatus Saccharibacteria;c__;o__;f__;g__;s__
	TH-08apr19-173		59.39	0	0	694758	1169823	44.393	92.53	d__Bacteria;p__Patescibacteria;c__Gracilibacteria;o__UBA1369;f__UBA12463;g__;s__	d__Bacteria;p__Candidatus Peregrinibacteria;c__;o__;f__;g__;s__
	TH-08apr19-232		67.07	0.85	0	811410	1199512	52.314	92.55	d__Bacteria;p__Patescibacteria;c__Paceibacteria;o__UBA9983_A;f__UBA2163;g__UBA10103;s__	d__Bacteria;p__Candidatus Kaiserbacteria;c__;o__;f__;g__;s__
	TH-08apr19-248	Adl1-134	59.87	0	0	664218	1109433	52.999	93.49	d__Bacteria;p__Patescibacteria;c__Paceibacteria;o__UBA9983_A;f__UBA2163;g__GWA1-54-10;s__	d__Bacteria;p__Candidatus Adlerbacteria;c__;o__;f__;g__;s__	Adl1-134
	TH-08apr19-279		58.12	0	0	735392	1265299	34.295	95.15	d__Bacteria;p__Patescibacteria;c__WWE3;o__2-01-FULL-39-13;f__2-01-FULL-39-13;g__GCA-002789015;s__	d__Bacteria;p__candidate division WWE3;c__;o__;f__;g__;s__
	TH-08apr19-54	Pgri-99	81.19	0.5	0	1254692	1537650	37.77	94.31	d__Bacteria;p__Patescibacteria;c__Gracilibacteria;o__UBA1369;f__2-02-FULL-48-14;g__;s__	d__Bacteria;p__Candidatus Peregrinibacteria;c__;o__;f__;g__;s__	Pgri-99
	TH-11nov19-123		64.85	1.49	50	507556	770999	42.869	92.66	d__Bacteria;p__Patescibacteria;c__Saccharimonadia;o__UBA4664;f__;g__;s__	d__Bacteria;p__Candidatus Saccharibacteria;c__;o__;f__;g__;s__
	TH-11nov19-135	Adl2-132	61.15	0	0	604444	988461	54.956	93.61	d__Bacteria;p__Patescibacteria;c__Paceibacteria;o__UBA9983_A;f__UBA2163;g__GWA1-54-10;s__	d__Bacteria;p__Candidatus Adlerbacteria;c__;o__;f__;g__;s__	Adl2-132
	TH-11nov19-141	Pgri-99	84.65	0	0	1229420	1452356	37.6	94.62	d__Bacteria;p__Patescibacteria;c__Gracilibacteria;o__UBA1369;f__2-02-FULL-48-14;g__;s__	d__Bacteria;p__Candidatus Peregrinibacteria;c__;o__;f__;g__;s__	Pgri-99
	TH-11nov19-157		64.76	0	0	650612	1004651	45.657	92.71	d__Bacteria;p__Patescibacteria;c__ABY1;o__SG8-24;f__UBA9934;g__UBA11707;s__	d__Bacteria;p__Candidatus Uhrbacteria;c__;o__;f__;g__;s__
	TH-11nov19-158	Adl1-134	59.87	0	0	664562	1110008	52.996	93.52	d__Bacteria;p__Patescibacteria;c__Paceibacteria;o__UBA9983_A;f__UBA2163;g__GWA1-54-10;s__	d__Bacteria;p__Candidatus Adlerbacteria;c__;o__;f__;g__;s__	Adl1-134
	TH-11nov19-189		66.48	0	0	438398	659443	39.01	91.47	d__Bacteria;p__Patescibacteria;c__Paceibacteria;o__UBA9983_A;f__Zambryskibacteraceae;g__;s__	d__Bacteria;p__Candidatus Zambryskibacteria;c__;o__;f__;g__;s__
	TH-11nov19-2		47.99	0	0	235285	490279	50.993	93.33	d__Bacteria;p__Patescibacteria;c__Paceibacteria;o__UBA6257;f__UBA11618;g__;s__	d__Bacteria;p__Candidatus Harrisonbacteria;c__;o__;f__;g__;s__
	TH-11nov19-213		69.31	0.99	0	1050209	1500233	39.935	93.36	d__Bacteria;p__Patescibacteria;c__Microgenomatia;o__Levybacterales;f__UBA12049;g__;s__	d__Bacteria;p__Candidatus Levybacteria;c__;o__;f__;g__;s__
	TH-11nov19-238		67.89	0.46	100	740715	1086032	49.994	92.04	d__Bacteria;p__Patescibacteria;c__ABY1;o__SG8-24;f__UBA9934;g__UBA11707;s__	d__Bacteria;p__Candidatus Uhrbacteria;c__;o__;f__;g__;s__
	TH-11nov19-29		77.43	0	0	884255	1142005	34.513	95.01	d__Bacteria;p__Patescibacteria;c__WWE3;o__2-01-FULL-39-13;f__2-01-FULL-39-13;g__GCA-002789015;s__	d__Bacteria;p__candidate division WWE3;c__;o__;f__;g__;s__
	TH-11nov19-49		64.8	1.12	0	590618	901239	42.692	85.8	d__Bacteria;p__Patescibacteria;c__Paceibacteria;o__UBA9983_A;f__UBA11359;g__;s__	d__Bacteria;p__Candidatus Taylorbacteria;c__;o__;f__;g__;s__
	TH-11nov19-56		67.07	0.85	0	829287	1225940	52.219	92.68	d__Bacteria;p__Patescibacteria;c__Paceibacteria;o__UBA9983_A;f__UBA2163;g__UBA10103;s__	d__Bacteria;p__Candidatus Kaiserbacteria;c__;o__;f__;g__;s__
	TH-11nov19-85		54.22	0	0	750840	1384802	35.74	91.72	d__Bacteria;p__Patescibacteria;c__Paceibacteria;o__UBA9983_A;f__UBA9973;g__UBA9973;s__	d__Bacteria;p__Candidatus Nomurabacteria;c__;o__;f__;g__;s__
	TH-11nov19-92		47.52	0	0	466943	982624	31.146	92.86	d__Bacteria;p__Patescibacteria;c__WWE3;o__;f__;g__;s__	d__Bacteria;p__candidate division WWE3;c__;o__;f__;g__;s__
	TH-Jun18-111	Pgri-124	82.67	1.98	100	1376326	1631879	40.294	92.33	d__Bacteria;p__Patescibacteria;c__Gracilibacteria;o__UBA1369;f__LOWO2-01-FULL-3;g__;s__	d__Bacteria;p__Candidatus Peregrinibacteria;c__;o__;f__;g__;s__	Pgri-124
	TH-Jun18-118	Adl2-132	61.15	0	0	604754	988968	54.974	93.75	d__Bacteria;p__Patescibacteria;c__Paceibacteria;o__UBA9983_A;f__UBA2163;g__GWA1-54-10;s__	d__Bacteria;p__Candidatus Adlerbacteria;c__;o__;f__;g__;s__	Adl2-132
	TH-Jun18-152		64.58	0	0	913543	1414591	38.947	94.72	d__Bacteria;p__Patescibacteria;c__Microgenomatia;o__UBA1406;f__GWC2-37-13;g__UBA1450;s__	d__Bacteria;p__Candidatus Roizmanbacteria;c__;o__;f__;g__;s__
	TH-Jun18-162	Pgri-99	44.66	0	0	619041	1386119	38.242	94.78	d__Bacteria;p__Patescibacteria;c__Gracilibacteria;o__UBA1369;f__2-02-FULL-48-14;g__;s__	d__Bacteria;p__Candidatus Peregrinibacteria;c__;o__;f__;g__;s__	Pgri-99
	TH-Jun18-197	Adl1-134	69.9	0	0	534748	765018	52.96	93	d__Bacteria;p__Patescibacteria;c__Paceibacteria;o__UBA9983_A;f__UBA2163;g__GWA1-54-10;s__	d__Bacteria;p__Candidatus Adlerbacteria;c__;o__;f__;g__;s__	Adl1-134
	TH-Jun18-261		56.24	0.85	0	638130	1125010	52.487	92.68	d__Bacteria;p__Patescibacteria;c__Paceibacteria;o__UBA9983_A;f__UBA2163;g__UBA10103;s__	d__Bacteria;p__Candidatus Kaiserbacteria;c__;o__;f__;g__;s__
	TH-Jun18-30		84.65	1.49	50	1163421	1353911	44.412	92.42	d__Bacteria;p__Patescibacteria;c__Gracilibacteria;o__UBA1369;f__UBA12463;g__;s__	d__Bacteria;p__Candidatus Peregrinibacteria;c__;o__;f__;g__;s__
	TH-Jun18-40		69.31	0	0	973928	1405176	39.504	93.33	d__Bacteria;p__Patescibacteria;c__Microgenomatia;o__Levybacterales;f__UBA12049;g__;s__	d__Bacteria;p__Candidatus Levybacteria;c__;o__;f__;g__;s__
	TH-Jun18-49		64.85	0.99	0	537339	820384	43.241	92.94	d__Bacteria;p__Patescibacteria;c__Saccharimonadia;o__UBA4664;f__;g__;s__	d__Bacteria;p__Candidatus Saccharibacteria;c__;o__;f__;g__;s__
	TH-Jun18-57		63.23	0	0	768953	1216120	44.138	93.14	d__Bacteria;p__Patescibacteria;c__ABY1;o__SG8-24;f__GWF2-40-263;g__;s__	d__Bacteria;p__Candidatus Uhrbacteria;c__;o__;f__;g__;s__
	TH-Jun18-84		63.11	1.12	0	593144	929330	42.965	85.28	d__Bacteria;p__Patescibacteria;c__Paceibacteria;o__UBA9983_A;f__UBA11359;g__;s__	d__Bacteria;p__Candidatus Taylorbacteria;c__;o__;f__;g__;s__
Traunsee	TrE-03may19-249		65.36	0.85	0	714859	1084428	52.361	92.2	d__Bacteria;p__Patescibacteria;c__Paceibacteria;o__UBA9983_A;f__UBA2163;g__UBA10103;s__	d__Bacteria;p__Candidatus Kaiserbacteria;c__;o__;f__;g__;s__
	TrH-03may19-176		71.55	0	0	775851	1084348	51.136	92.15	d__Bacteria;p__Patescibacteria;c__ABY1;o__SG8-24;f__UBA9934;g__UBA11707;s__	d__Bacteria;p__Candidatus Uhrbacteria;c__;o__;f__;g__;s__
	TrH-03may19-265		74.43	3.45	50	883876	1146556	51.877	90.99	d__Bacteria;p__Patescibacteria;c__Paceibacteria;o__UBA9983_A;f__UBA2163;g__;s__	d__Bacteria;p__Candidatus Kaiserbacteria;c__;o__;f__;g__;s__
	TrH-03may19-290		71.29	2.48	0	928274	1269817	49.449	91.4	d__Bacteria;p__Patescibacteria;c__ABY1;o__SG8-24;f__UBA9934;g__UBA11707;s__	d__Bacteria;p__Candidatus Uhrbacteria;c__;o__;f__;g__;s__
	TrH-03may19-292		60.23	1.71	50	700104	1142507	52.308	92.77	d__Bacteria;p__Patescibacteria;c__Paceibacteria;o__UBA9983_A;f__UBA2163;g__UBA10103;s__	d__Bacteria;p__Candidatus Kaiserbacteria;c__;o__;f__;g__;s__
	TrH-03may19-308		40.31	0	0	232012	575569	50.368	92.37	d__Bacteria;p__Patescibacteria;c__Paceibacteria;o__UBA6257;f__UBA11618;g__;s__	d__Bacteria;p__Candidatus Harrisonbacteria;c__;o__;f__;g__;s__
	TrH-25oct19-103		69.31	1.98	50	912413	1290358	49.502	91.21	d__Bacteria;p__Patescibacteria;c__ABY1;o__SG8-24;f__UBA9934;g__UBA11707;s__	d__Bacteria;p__Candidatus Uhrbacteria;c__;o__;f__;g__;s__
	TrH-25oct19-144		71.84	0	0	914139	1272465	51.743	90.23	d__Bacteria;p__Patescibacteria;c__Paceibacteria;o__UBA9983_A;f__UBA2163;g__;s__	d__Bacteria;p__Candidatus Kaiserbacteria;c__;o__;f__;g__;s__
	TrH-25oct19-200		77.11	0	0	713242	924966	38.07	91.7	d__Bacteria;p__Patescibacteria;c__Paceibacteria;o__UBA9983_A;f__UBA9973;g__UBA9973;s__	d__Bacteria;p__Candidatus Nomurabacteria;c__;o__;f__;g__;s__
	TrH-25oct19-208	ABY1b-1345	70.79	1.16	0	864550	1207121	51.447	91.71	d__Bacteria;p__Patescibacteria;c__ABY1;o__SG8-24;f__UBA9934;g__UBA11707;s__	d__Bacteria;p__Candidatus Uhrbacteria;c__;o__;f__;g__;s__	ABY1b-1345
	TrH-25oct19-271		80.46	3.61	100	515664	617758	39.064	90.81	d__Bacteria;p__Patescibacteria;c__Paceibacteria;o__UBA9983_A;f__;g__;s__	d__Bacteria;p__Candidatus Zambryskibacteria;c__;o__;f__;g__;s__
	TrH-25oct19-38		52.72	0	0	359640	682169	43.497	91.6	d__Bacteria;p__Patescibacteria;c__Paceibacteria;o__UBA9983_A;f__UBA11359;g__C7867-002;s__	d__Bacteria;p__Candidatus Parcubacteria;c__;o__;f__;g__;s__
	TrH-25oct19-77		61.16	0	0	563906	922017	40.891	89.06	d__Bacteria;p__Patescibacteria;c__Paceibacteria;o__UBA9983_A;f__UBA9973;g__;s__	d__Bacteria;p__Candidatus Nomurabacteria;c__;o__;f__;g__;s__
	TrH-25oct19-80		58.17	2.25	50	434936	730874	49.966	91.95	d__Bacteria;p__Patescibacteria;c__Paceibacteria;o__UBA6257;f__UBA11618;g__;s__	d__Bacteria;p__Candidatus Harrisonbacteria;c__;o__;f__;g__;s__
	TrH-25oct19-91		58.26	0.85	0	698161	1188167	52.271	92.91	d__Bacteria;p__Patescibacteria;c__Paceibacteria;o__UBA9983_A;f__UBA2163;g__UBA10103;s__	d__Bacteria;p__Candidatus Kaiserbacteria;c__;o__;f__;g__;s__
Zurich	ZE-03apr19-185		82.89	0	0	590723	712658	31.888	92.48	d__Bacteria;p__Patescibacteria;c__Paceibacteria;o__UBA9983_A;f__UBA11359_B;g__;s__	d__Bacteria;p__Candidatus Taylorbacteria;c__;o__;f__;g__;s__
	ZE-17mar17-112	ZE-1429	81.17	0	0	631878	778462	31.977	91.72	d__Bacteria;p__Patescibacteria;c__Paceibacteria;o__UBA9983_A;f__UBA11359_B;g__;s__	d__Bacteria;p__Candidatus Taylorbacteria;c__;o__;f__;g__;s__	ZE-1429
	ZE-17mar17-71	ZE-1429	81.17	0	0	626383	771692	31.959	91.89	d__Bacteria;p__Patescibacteria;c__Paceibacteria;o__UBA9983_A;f__UBA11359_B;g__;s__	d__Bacteria;p__Candidatus Taylorbacteria;c__;o__;f__;g__;s__	ZE-1429
	ZE-3nov15-161		51.44	0.47	100	1291396	2498690	33.438	80.07	d__Bacteria;p__Patescibacteria;c__UBA1384;o__2-12-FULL-50-11;f__;g__;s__	d__Bacteria;p__Candidatus Berkelbacteria;c__;o__;f__;g__;s__
	ZE-Oct18-214		82.6	0	0	704944	853443	34.32	90.56	d__Bacteria;p__Patescibacteria;c__Paceibacteria;o__SW-4-49-11;f__SW-4-49-11;g__;s__	d__Bacteria;p__;c__;o__;f__;g__;s__
	ZE-Oct18-75		87.77	0	0	786948	896602	34.246	90.94	d__Bacteria;p__Patescibacteria;c__Paceibacteria;o__SW-4-49-11;f__SW-4-49-11;g__;s__	d__Bacteria;p__;c__;o__;f__;g__;s__
	ZH-03apr19-182	ZE-1429	79.44	1.72	100	583158	721459	31.84	92.55	d__Bacteria;p__Patescibacteria;c__Paceibacteria;o__UBA9983_A;f__UBA11359_B;g__;s__	d__Bacteria;p__Candidatus Taylorbacteria;c__;o__;f__;g__;s__	ZE-1429
	ZH-03nov15-118		69.8	0	0	852500	1221346	54.935	91.78	d__Bacteria;p__Patescibacteria;c__ABY1;o__SG8-24;f__GWF2-40-263;g__2-01-FULL-63-20;s__	d__Bacteria;p__Candidatus Uhrbacteria;c__;o__;f__;g__;s__
	ZH-03nov15-155		59.9	1.98	0	816475	1336074	61.329	93.48	d__Bacteria;p__Patescibacteria;c__ABY1;o__SG8-24;f__GWF2-40-263;g__YC12-FULL-57-11;s__	d__Bacteria;p__Candidatus Uhrbacteria;c__;o__;f__;g__;s__
	ZH-03nov15-64		42.81	0	0	292074	682256	43.852	94.09	d__Bacteria;p__Patescibacteria;c__Saccharimonadia;o__UBA4664;f__;g__;s__	d__Bacteria;p__Candidatus Saccharibacteria;c__;o__;f__;g__;s__
	ZH-13may13-156	Adl2-132	45.17	0	0	486416	1076856	48.483	92.35	d__Bacteria;p__Patescibacteria;c__Paceibacteria;o__UBA9983_A;f__UBA2163;g__GWA1-54-10;s__	d__Bacteria;p__Candidatus Adlerbacteria;c__;o__;f__;g__;s__	Adl2-132
	ZH-13may13-165		25.48	0	0	205626	807009	45.611	91.22	d__Bacteria;p__Patescibacteria;c__Saccharimonadia;o__UBA4664;f__;g__;s__	d__Bacteria;p__Candidatus Saccharibacteria;c__;o__;f__;g__;s__
	ZH-13may13-173	Adl2-132	44.31	0	0	489526	1104775	48.392	91.95	d__Bacteria;p__Patescibacteria;c__Paceibacteria;o__UBA9983_A;f__UBA2163;g__GWA1-54-10;s__	d__Bacteria;p__Candidatus Adlerbacteria;c__;o__;f__;g__;s__	Adl2-132
	ZH-13nov19-192	Adl2-132	57.24	0.14	0	601432	1049248	48.662	92.11	d__Bacteria;p__Patescibacteria;c__Paceibacteria;o__UBA9983_A;f__UBA2163;g__GWA1-54-10;s__	d__Bacteria;p__Candidatus Adlerbacteria;c__;o__;f__;g__;s__	Adl2-132
	ZH-13nov19-250		64.67	0	0	560275	866359	42.917	86.36	d__Bacteria;p__Patescibacteria;c__Paceibacteria;o__UBA9983_A;f__UBA11359;g__;s__	d__Bacteria;p__Candidatus Taylorbacteria;c__;o__;f__;g__;s__
	ZH-3nov15-115		59.9	0.99	0	823033	1360408	61.349	93.44	d__Bacteria;p__Patescibacteria;c__ABY1;o__SG8-24;f__GWF2-40-263;g__YC12-FULL-57-11;s__	d__Bacteria;p__Candidatus Uhrbacteria;c__;o__;f__;g__;s__
	ZH-3nov15-158		69.8	0	0	858669	1230184	54.927	91.76	d__Bacteria;p__Patescibacteria;c__ABY1;o__SG8-24;f__GWF2-40-263;g__2-01-FULL-63-20;s__	d__Bacteria;p__Candidatus Uhrbacteria;c__;o__;f__;g__;s__
	ZH-bin-154	Pgri-124	84.16	0	0	1213761	1442206	38.209	93.66	d__Bacteria;p__Patescibacteria;c__Gracilibacteria;o__UBA1369;f__LOWO2-01-FULL-3;g__;s__	d__Bacteria;p__Candidatus Peregrinibacteria;c__;o__;f__;g__;s__	Pgri-124
	ZH-bin-156		66.34	0.11	0	916874	1380562	44.765	91.98	d__Bacteria;p__Patescibacteria;c__ABY1;o__SG8-24;f__GWF2-40-263;g__;s__	d__Bacteria;p__Candidatus Uhrbacteria;c__;o__;f__;g__;s__
	ZH-Jul18-129		50.49	1.12	0	500628	980433	43.162	93.19	d__Bacteria;p__Patescibacteria;c__ABY1;o__SG8-24;f__GWF2-40-263;g__XYB2-FULL-45-11;s__	d__Bacteria;p__Candidatus Uhrbacteria;c__;o__;f__;g__;s__
	ZH-Jul18-135		59.65	2.25	0	728608	1193988	40.049	93.22	d__Bacteria;p__Patescibacteria;c__ABY1;o__Magasanikbacterales;f__UBA922;g__2-12-FULL-41-16;s__	d__Bacteria;p__Candidatus Magasanikbacteria;c__;o__;f__;g__;s__
	ZH-Jul18-155	Pgri-124	71.69	0.69	50	1038627	1438778	38.055	94.02	d__Bacteria;p__Patescibacteria;c__Gracilibacteria;o__UBA1369;f__LOWO2-01-FULL-3;g__;s__	d__Bacteria;p__Candidatus Peregrinibacteria;c__;o__;f__;g__;s__	Pgri-124
	ZH-Jul18-167		59.65	2.25	0	728608	1193988	40.049	93.22	d__Bacteria;p__Patescibacteria;c__ABY1;o__Magasanikbacterales;f__UBA922;g__2-12-FULL-41-16;s__	d__Bacteria;p__Candidatus Magasanikbacteria;c__;o__;f__;g__;s__
	ZH-Jul18-243	Pgri-124	78.62	0.69	50	1097169	1385905	38.117	93.94	d__Bacteria;p__Patescibacteria;c__Gracilibacteria;o__UBA1369;f__LOWO2-01-FULL-3;g__;s__	d__Bacteria;p__Candidatus Peregrinibacteria;c__;o__;f__;g__;s__	Pgri-124
	ZH-Jul18-43		50.49	0	0	504597	999399	43.137	93.1	d__Bacteria;p__Patescibacteria;c__ABY1;o__SG8-24;f__GWF2-40-263;g__XYB2-FULL-45-11;s__	d__Bacteria;p__Candidatus Uhrbacteria;c__;o__;f__;g__;s__
	ZH-Oct18-36		51.81	1.87	66.67	368170	697327	36.12	91.29	d__Bacteria;p__Patescibacteria;c__Paceibacteria;o__UBA9983_A;f__XYD1-FULL-46-19;g__;s__	d__Bacteria;p__Candidatus Vogelbacteria;c__;o__;f__;g__;s__
	ZH-Oct18-90		60.93	3.42	75	571532	905934	36.471	91.16	d__Bacteria;p__Patescibacteria;c__Paceibacteria;o__UBA9983_A;f__XYD1-FULL-46-19;g__;s__	d__Bacteria;p__Candidatus Vogelbacteria;c__;o__;f__;g__;s__
	MIN		25.48		MIN	205626	490279	24.957	80.07
	MAX		87.77		MAX	1549810	2498690	61.349	95.44
					Median	631068	1023761	43.4195	92.32
										d__Bacteria;p__Patescibacteria;c__Paceibacteria;o__UBA9983_A;f__;g__;s__
										d__Bacteria;p__Patescibacteria;c__Gracilibacteria;o__Peribacterales;f__Peribacteraceae;g__2-02-FULL-51-10;s__
										d__Bacteria;p__Patescibacteria;c__ABY1;o__SG8-24;f__GWF2-40-263;g__YC12-FULL-57-11;s__
										d__Bacteria;p__Patescibacteria;c__Microgenomatia;o__Levybacterales;f__UBA12049;g__;s__
										d__Bacteria;p__Patescibacteria;c__Saccharimonadia;o__UBA4664;f__;g__;s__
										d__Bacteria;p__Patescibacteria;c__Kazan-3B-28;o__;f__;g__;s__
										d__Bacteria;p__Patescibacteria;c__WWE3;o__UBA101185;f__UBA10185;g__;s__
										d__Bacteria;p__Patescibacteria;c__UBA1384;o__2-12-FULL-50-11;f__;g__;s__

## Sheet: Table_S4
Back to index
Supplementary Table 4. List of final, dereplicated bins and the ones of lower quatily that were collapsed into them.
Lake	Final bins	Collapsed bins							Class
Attersee	AE-03may19-31	AH-03may19-46	AH-24oct19-277						Paceibacteria
	AH-03may19-119	AH-24oct19-52							Paceibacteria
	AH-03may19-31	AH-24oct19-287							Gracilibacteria
	AH-03may19-8								ABY1
	AH-24oct19-230	AH-03may19-69							Paceibacteria
	AH-24oct19-37	AH-03may19-109							Paceibacteria
	AH-24oct19-282								ABY1
Baikal	Baikal-1250m-152								Microgenomatia
	Baikal-1250m-192	Baikal-deep-G190							Paceibacteria
	Baikal-1250m-222	Baikal-deep-G185							Paceibacteria
	Baikal-1250m-338	Baikal-deep-G200							Paceibacteria
	Baikal-1250m-373	Baikal-deep-G207							Saccharimonadia
	Baikal-1250m-46								Paceibacteria
	Baikal-1350m-104	Baikal-deep-G202							Paceibacteria
	Baikal-1350m-131								Paceibacteria
	Baikal-1350m-133								Paceibacteria
	Baikal-1350m-162	Baikal-deep-G210							Paceibacteria
	Baikal-1350m-263	Baikal-deep-G195							Paceibacteria
	Baikal-1350m-280	Baikal-deep-G189							Paceibacteria
	Baikal-1350m-319								Paceibacteria
	Baikal-1350m-357								Paceibacteria
	Baikal-1350m-369	Baikal-deep-G196							Paceibacteria
	Baikal-1350m-53	Baikal-deep-G199							Paceibacteria
	Baikal-deep-G183								Microgenomatia
	Baikal-deep-G184								Paceibacteria
	Baikal-deep-G186								Paceibacteria
	Baikal-deep-G188								Paceibacteria
	Baikal-deep-G192								Saccharimonadia
	Baikal-deep-G193								Kazan-3B-28
	Baikal-deep-G194								ABY1
	Baikal-deep-G203								Paceibacteria
	Baikal-deep-G206								Gracilibacteria
	Baikal-deep-G209								Paceibacteria
	Baikal-deep-G211								Gracilibacteria
	Baikal-deep-G212								ABY1
Biwa	Biwa-bin1								Saccharimonadia
	Biwa-bin2								Microgenomatia
Constance	CH-Jul18-31								Saccharimonadia
	CH-Oct18-100								Paceibacteria
	CH-Oct18-118	CH-Jul18-99							Paceibacteria
	CH-Oct18-39								Gracilibacteria
	CH-Oct18-50	CH-Jul18-93							ABY1
	CH-Oct18-75	CH-Jul18-211							Paceibacteria
	CH-Oct18-76								Paceibacteria
	CH-Oct18-95								Paceibacteria
	CH-Oct18-96	CH-Jul18-212							Paceibacteria
Greifensee	GH-07nov19-153								Gracilibacteria
Ikeda	Ike-100m-1								Paceibacteria
	Ike-100m-12								Microgenomatia
	Ike-100m-2								Paceibacteria
	Ike-100m-20								Paceibacteria
	Ike-100m-30								Paceibacteria
	Ike-100m-32								Paceibacteria
	Ike-100m-33								Paceibacteria
	Ike-100m-35								Paceibacteria
	Ike-100m-40								Paceibacteria
	Ike-100m-41								Paceibacteria
	Ike-150m-21								Paceibacteria
	Ike-150m-34								Paceibacteria
	Ike-150m-44								ABY1
	Ike-150m-55								Paceibacteria
	Ike-200m-19								Paceibacteria
	Ike-200m-22								Microgenomatia
	Ike-200m-38								Paceibacteria
	Ike-200m-53								Gracilibacteria
	Ike-200m-9								Paceibacteria
	Ike-50m-33								ABY1
	Ike-50m-40								Paceibacteria
	Ike-50m-54								Gracilibacteria
Jiricka	Jr-19feb18-57								Saccharimonadia
	Jr-19feb18-67								Paceibacteria
Lugano	LH-02apr19-200								Paceibacteria
	LH-02apr19-23								Saccharimonadia
	LH-02apr19-231								Paceibacteria
	LH-05nov19.122								Gracilibacteria
Maggiore	Mag-100m-18	MaH-04nov19-190							ABY1
	Mag-300m-26								Saccharimonadia
	MaH-04nov19-100								Gracilibacteria
	MaH-04nov19-107	Mag-300m-6							Paceibacteria
	MaH-04nov19-108								Paceibacteria
	MaH-04nov19-110	MaH-09apr19-83							Gracilibacteria
	MaH-04nov19-177	MaH-09apr19-187							Gracilibacteria
	MaH-04nov19-192	MaH-09apr19-3							ABY1
	MaH-04nov19-195	MaH-09apr19-142							Paceibacteria
	MaH-04nov19-197	MaH-09apr19-23							Paceibacteria
	MaH-04nov19-39								Gracilibacteria
	MaH-04nov19-42	MaH-09apr19-234							Gracilibacteria
	MaH-04nov19-6	MaH-09apr19-218							ABY1
	MaH-04nov19-71								Paceibacteria
	MaH-04nov19-74								ABY1
	MaH-04nov19-81	MaH-09apr19-211							Paceibacteria
	MaH-04nov19-96	MaH-09apr19-135							Paceibacteria
	MaH-04nov19-97								Paceibacteria
	MaH-09apr19-126	MaH-04nov19-148							Paceibacteria
	MaH-09apr19-161	MaH-04nov19-141							Paceibacteria
	MaH-09apr19-169	MaH-04nov19-275							Gracilibacteria
	MaH-09apr19-21								ABY1
	MaH-09apr19-231								Saccharimonadia
	MaH-09apr19-248	MaH-04nov19-216							Paceibacteria
	MaH-09apr19-252	MaH-04nov19-253							ABY1
	MaH-09apr19-65	MaH-04nov19-280	Mag-300m-37						ABY1
	MaH-09apr19-90								Paceibacteria
Medard	MH-21oct19-172	MH-09jul19-147	ME-08apr19-244	MH-08apr19-36					Paceibacteria
Milada	MiE-14oct19-109								Paceibacteria
	MiE-16apr19-201	MiH-16apr19-11							WWE3
	MiE-16apr19-257	MiH-16apr19-251							Saccharimonadia
	MiH-14oct19-109								Microgenomatia
	MiH-14oct19-129								Paceibacteria
	MiH-14oct19-207								ABY1
Mondsee	MoH-23oct19-148								Paceibacteria
	MoH-23oct19-239								ABY1
Most	MsH-01oct19-133								Microgenomatia
	MsH-01oct19-19								Saccharimonadia
	MsH-01oct19-81								Paceibacteria
	MsH-01oct19-87								Paceibacteria
	MsH-30apr19-258								Gracilibacteria
	MsH-30apr19-336	MsH-01oct19-93	MsE-30apr19-136						Paceibacteria
	MsH-30jul19-11	MsH-01oct19-288							Saccharimonadia
Rimov	RE-15aug16-192								Paceibacteria
	RE-4nov15-20								Paceibacteria
	RE-4nov15-362	RH-27jun17-110	RH-26jul17-60						Paceibacteria
	RH-20apr16-362								Saccharimonadia
	RH-23may17-1099	RH-9nov16-150							Paceibacteria
	RH-23may17-1	RH-27jun17-134	RH-26jul17-300	RH-14apr17-375	RH-20apr16-349	RH-15aug16-19	RE-20apr16-173	RH-18aug17-358	Saccharimonadia
	RH-23may17-429	RH-15aug16-101							Paceibacteria
	RH-23may17-877								Paceibacteria
	RH-23may17-878								Paceibacteria
	RH-26jul17-192								Saccharimonadia
	RH-26jul17-99	RH-23may17-1289	RH-14apr17-556	RH-27jun17-373	RH-18aug17-140	RH-20apr16-175			Saccharimonadia
	RH-27jun17-331	RH-26jul17-250							Saccharimonadia
	RH-15aug16-383								Saccharimonadia
	RH-20apr16-307								Saccharimonadia
	RH-23may17-197								Saccharimonadia
Thun	TE-08apr19-119	TH-11nov19-49	TH-Jun18-84						Paceibacteria
	TH-08apr19-126								Saccharimonadia
	TH-08apr19-232	TH-11nov19-56	TH-Jun18-261						Paceibacteria
	TH-08apr19-279	TH-11nov19-29							WWE3
	TH-11nov19-123	TH-Jun18-49							Saccharimonadia
	TH-11nov19-141	TH-08apr19-54	TH-Jun18-162						Gracilibacteria
	TH-11nov19-157								ABY1
	TH-11nov19-158	TH-08apr19-248	TH-Jun18-197						Paceibacteria
	TH-11nov19-189								Paceibacteria
	TH-11nov19-213	TH-Jun18-40							Microgenomatia
	TH-11nov19-238								ABY1
	TH-11nov19-2								Paceibacteria
	TH-11nov19-85								Paceibacteria
	TH-11nov19-92								WWE3
	TH-Jun18-111								Gracilibacteria
	TH-Jun18-118	TH-11nov19-135	TH-08apr19-104						Paceibacteria
	TH-Jun18-152								Microgenomatia
	TH-Jun18-30								Gracilibacteria
	TH-Jun18-57								ABY1
Traunsee	TrE-03may19-249	TrH-03may19-292	TrH-25oct19-91						Paceibacteria
	TrH-03may19-290	TrH-25oct19-103							ABY1
	TrH-25oct19-144	TrH-03may19-265							Paceibacteria
	TrH-25oct19-200								Paceibacteria
	TrH-25oct19-208	TrH-03may19-176							ABY1
	TrH-25oct19-271								Paceibacteria
	TrH-25oct19-38								Paceibacteria
	TrH-25oct19-77								Paceibacteria
	TrH-25oct19-80								Paceibacteria
Zurich	ZE-17mar17-112	ZE-17mar17-71	ZE-03apr19-185	ZH-03apr19-182					Paceibacteria
	ZE-3nov15-161								UBA1384
	ZE-Oct18-214								Paceibacteria
	ZH-03nov15-118	ZH-3nov15-158							ABY1
	ZH-03nov15-64								Saccharimonadia
	ZH-13nov19-192	ZH-13may13-156	ZH-13may13-173						Paceibacteria
	ZH-13nov19-250								Paceibacteria
	ZH-3nov15-115	ZH-03nov15-155							ABY1
	ZH-bin-156								ABY2
	ZH-Jul18-129	ZH-Jul18-43							ABY3
	ZH-Jul18-135	ZH-Jul18-167							ABY4
	ZH-Jul18-243	ZH-Jul18-155	ZH-bin-154						Gracilibacteria
	ZH-Oct18-90	ZH-Oct18-36							Paceibacteria

## Sheet: Table_S5
Back to index
Supplementary Table 4. Annotation results of CPRs at class level. KEGG modules were manually checked for completeness after annotationg the bins using different databases (Panda, TIGR, COG, Interproscan and Pfam).
Group	Category	Pathway	Module ID	ABY1	Gracilibacteria	Kazan	Microgenomatia	Paceibacteria	Saccharimonadia	UBA1384	WWE3		Obs:
Carbohydrate and lipid metabolism	Carbon fixation	Reductive pentose phosphate cycle (Calvin cycle)	M00165	x	x	x	x	x	x	x	x
		Reductive pentose phosphate cycle, ribulose-5P => glyceraldehyde-3P	M00166	x	x	x	x	x	x	x	x
		Reductive pentose phosphate cycle, glyceraldehyde-3P => ribulose-5P	M00167	1	1	x	1	1	x, COG	x	x		x fructose-1,6-bisphosphatase is missing in Sacchari (in COG- Archaeal fructose-1,6-bisphosphatase) and UBA, fructose-bisphosphate aldolase and fructose-1,6-bisphosphatase are missing in WWE
		Reductive citrate cycle (Arnon-Buchanan cycle)	M00173	x	x	x	x	x	x	x	x
		CAM (Crassulacean acid metabolism), dark	M00168	x	1	x	x	x	x	x	x	???			Meaning
		CAM (Crassulacean acid metabolism), light	M00169	x	1	x	x	x	x	x	x	???			x = pathway not complete in any genome
		C4-dicarboxylic acid cycle, NADP - malic enzyme type	M00172	x	x	x	x	x	x	x	x				1 = pathway complete in at least 1 genome
		C4-dicarboxylic acid cycle, NAD - malic enzyme type	M00171	x	x	x	x	x	x	x	x				x = only one enzyme missing
		Phosphate acetyltransferase-acetate kinase pathway, acetyl-CoA => acetate	M00579		1										1 = pathway is complete, but rarely
		C4-dicarboxylic acid cycle, phosphoenolpyruvate carboxykinase type	M00170	x	x	x	x	x	x	x	x
	Nitrogen metabolism	Nitrogen fixation, nitrogen => ammonia	M00175	x	x	x	x	x	x	x	x
		Assimilatory nitrate reduction, nitrate => ammonia	M00531	x	x	x	x	x	x	x	x
		Dissimilatory nitrate reduction, nitrate => ammonia	M00530	x	x	x	x	x	x	x	x
		Denitrification, nitrate => nitrogen	M00529	x	x	x	x	x	x	x	x
		Nitrification, ammonia => nitrite	M00528	x	x	x	x	x	x	x	x
		Complete nitrification, comammox, ammonia => nitrite => nitrate	M00804	x	x	x	x	x	x	x	x
	Metanogenesis	Methanogenesis, CO2 => methane	M00567	x	x	x	x	x	x	x	x
		Methanogenesis, acetate => methane	M00357	x	x	x	x	x	x	x	x
		Methanogenesis, methanol => methane	M00356	x	x	x	x	x	x	x	x
		Methanogenesis, methylamine/dimethylamine/trimethylamine => methane	M00563	x	x	x	x	x	x	x	x
		Coenzyme M biosynthesis	M00358	x	x	x	x	x	x	x	x
		2-Oxocarboxylic acid chain extension, 2-oxoglutarate => 2-oxoadipate => 2-oxopimelate => 2-oxosuberate	M00608	x	x	x	x	x	x	x	x
		Methane oxidation, methanotroph, methane => formaldehyde	M00174	x	x	x	x	x	x	x	x
		Formaldehyde assimilation, serine pathway	M00346	x	x	x	x	x	x	x	x
		Formaldehyde assimilation, ribulose monophosphate pathway	M00345	x	x	x	x	x	x	x	x
		Formaldehyde assimilation, xylulose monophosphate pathway	M00344	x	x	x	x	x	x	x	x
		F420 biosynthesis	M00378	x	x	x	x	x	x	x	x
		Acetyl-CoA pathway, CO2 => acetyl-CoA	M00422	x	x	x	x	x	x	x	x
	Sulfur metabolism	Assimilatory sulfate reduction, sulfate => H2S	M00176	x	x	x	x	x	x	x	x
		Dissimilatory sulfate reduction, sulfate => H2S	M00596	x	x	x	x	x	x	x	x
		Thiosulfate oxidation by SOX complex, thiosulfate => sulfate	M00595	x	x	x	x	x	x	x	x
	Central carbohydrate metabolism	Glycolysis (Embden-Meyerhof pathway), glucose => pyruvate	M00001	x	x	x	x	1	x	x	x
		Glycolysis, core module involving three-carbon compounds	M00002	1	1	x	1	1	1	x	1
		Gluconeogenesis, oxaloacetate => fructose-6P	M00003	x, COGs	x, COGs	x	x, COGs	x, COG	x	x	x
		Pyruvate oxidation, pyruvate => acetyl-CoA	M00307	x	x	x	x	x	x	x	x
		Citrate cycle (TCA cycle, Krebs cycle)	M00009	x	x	x	x	x	x	x	x
		Pentose phosphate pathway	M00004	x	1	x	x, COGs	1	1	x	x
		Pentose phosphate pathway, oxidative phase, glucose 6P => ribulose 5P	M00006	1	1	x	1	1	1	x	x
		Pentose phosphate pathway, non-oxidative phase, fructose 6P => ribose 5P	M00007	1	1	x	1	1	1	x	x
		PRPP biosynthesis, ribose 5P => PRPP	M00005	1	1	x	1	1	x	x	x
		Entner-Doudoroff pathway, glucose-6P => glyceraldehyde-3P + pyruvate	M00008	x	x	x	x	x	x	x	x
		Semi-phosphorylative Entner-Doudoroff pathway, gluconate => glycerate-3P	M00308	x	x	x	x	x	x	x	x
		Semi-phosphorylative Entner-Doudoroff pathway, gluconate/galactonate => glycerate-3P	M00633	x	x	x	x	x	x	x	x
		Non-phosphorylative Entner-Doudoroff pathway, gluconate/galactonate => glycerate	M00309	x	x	x	x	x	x	x	x
	Other carbohydrate metabolism	dTDP-L-rhamnose biosynthesis	M00793	1	x	1	1	1	1	x	x
		Nucleotide sugar biosynthesis, glucose => UDP-glucose	M00549	x	x, COGs	x	x, COGs	x	x	x	x
		Galactose degradation, Leloir pathway, galactose => alpha-D-glucose-1P	M00632	x	x	x	1	x	x	x	x
	Fatty acid metabolism	Fatty acid biosynthesis, initiation	M00082	x	x	x	x	x	x	x	x
		Fatty acid biosynthesis, elongation	M00083	x	x	x	x	x	x	x	x
		Jasmonic acid biosynthesis	M00113	x	x	x	x	x	x	x	x
		beta-Oxidation, acyl-CoA synthesis	M00086	x	x	x	x	x	x	x	x
		beta-Oxidation	M00087	x	x	x	x	x	x	x	x
		Ketone body biosynthesis, acetyl-CoA => acetoacetate/3-hydroxybutyrate/acetone	M00088	x	x	x	x	x	x	x	x
		Triacylglycerol biosynthesis	M00089	x	x	x	x	x	x	x	x
		Acylglycerol degradation	M00098	x	x	x	x	x	x	x	x
		Phosphatidylcholine (PC) biosynthesis, choline => PC	M00090	x	x	x	x	x	x	x	x
		Phosphatidylcholine (PC) biosynthesis, PE => PC	M00091	x	x	x	x	x	x	x	x
		Phosphatidylethanolamine (PE) biosynthesis, ethanolamine => PE	M00092	x	x	x	x	x	x	x	x
		Phosphatidylethanolamine (PE) biosynthesis, PA => PS => PE	M00093	x	x	x	x	x	x	x	x
		Inositol phosphate metabolism, PI=> PIP2 => Ins(1,4,5)P3 => Ins(1,3,4,5)P4	M00130	x	x	x	x	x	x	x	x
		Inositol phosphate metabolism, Ins(1,3,4,5)P4 => Ins(1,3,4)P3 => myo-inositol	M00131	x	x	x	x	x	x	x	x
		Inositol phosphate metabolism, Ins(1,3,4)P3 => phytate	M00132	x	x	x	x	x	x	x	x
		Ceramide biosynthesis	M00094	x	x	x	x	x	x	x	x
		Lactosylceramide biosynthesis	M00066	x	x	x	x	x	x	x	x
		Cerebroside and sulfatide biosynthesis	M00067	x	x	x	x	x	x	x	x
		Sphingosine biosynthesis	M00099	x	x	x	x	x	x	x	x
		Sphingosine degradation	M00100	x	x	x	x	x	x	x	x
	Lipopolysaccharide metabolism	Lipopolysaccharide biosynthesis, KDO2-lipid A	M00060	x	x	x	x	x	x	x	x
		CMP-KDO biosynthesis	M00063	x	x	x	x	x	x	x	x
		ADP-L-glycero-D-manno-heptose biosynthesis [PATH:map00540]	M00064	x	x	x	x	x, TIGR	x	x	x
		Lipopolysaccharide biosynthesis, inner core => outer core => O-antigen [PATH:map00540]	M00080	x	x	x	x	x	x	x	x
	Glycan metabolism	N-glycan precursor biosynthesis	M00055	x	x	x	x	x	x	x	x
		N-glycosylation by oligosaccharyltransferase	M00072	x	x	x	x	x	x	x	x
		N-glycan precursor trimming	M00073	x	x	x	x	x	x	x	x
		N-glycan biosynthesis, high-mannose type	M00074	x	x	x	x	x	x	x	x
		N-glycan biosynthesis, complex type	M00075	x	x	x	x	x	x	x	x
		O-glycan biosynthesis, mucin type core	M00056	x	x	x	x	x	x	x	x
		Glycosphingolipid biosynthesis, lacto-series, LacCer => Lc4Cer	M00070	x	x	x	x	x	x	x	x
		Glycosphingolipid biosynthesis, neolacto-series, LacCer => nLc4Cer	M00071	x	x	x	x	x	x	x	x
		Glycosphingolipid biosynthesis, globo-series, LacCer => Gb4Cer	M00068	x	x	x	x	x	x	x	x
		Glycosphingolipid biosynthesis, ganglio series, LacCer => GT3	M00069	x	x	x	x	x	x	x	x
		GPI-anchor biosynthesis, core oligosaccharide	M00065	x	x	x	x	x	x	x	x
	Glycosaminoglycan metabolism	All pathways		x	x	x	x	x	x	x	x
	Terpenoid backbone biosynthesis	C5 isoprenoid biosynthesis, mevalonate pathway	M00095	x	x	x	x	x	x	x	x
		C5 isoprenoid biosynthesis, non-mevalonate pathway	M00096	x	x	x	x	x	x	x	x
		C10-C20 isoprenoid biosynthesis, bacteria	M00364	1	1	x	1	1	1	x	x
		C10-C20 isoprenoid biosynthesis, archaea	M00365	1	x	x	1	1	1	x	x
		C10-C20 isoprenoid biosynthesis, plants	M00366	x	x	x	x	x	x	x	x
		C10-C20 isoprenoid biosynthesis, non-plant eukaryotes	M00367	x	x	x	x	x	x	x	x
	Sterol biosynthesis	All pathways		x	x	x	x	x	x	x	x
	Other terpenoid biosynthesis	All pathways		x	x	x	x	x	x	x	x
Nucleotide and amino acid metabolism	Purine metabolism	Inosine monophosphate biosynthesis, PRPP + glutamine => IMP	M00048	x	1	x	1	1	x	x	x
		Adenine ribonucleotide biosynthesis, IMP => ADP,ATP	M00049	1	1	x	1	1	x	x	x
		Guanine ribonucleotide biosynthesis IMP => GDP,GTP	M00050	1	x, COGs	x	x	1	x	x	x
		Purine degradation, xanthine => urea	M00546	x	x	x	x	x	x	x	x
	Pyrimidine metabolism	Uridine monophosphate biosynthesis, glutamine (+ PRPP) => UMP	M00051	x	x	x	x, COGs	x	x	x	x
		Pyrimidine ribonucleotide biosynthesis, UMP => UDP/UTP,CDP/CTP	M00052	1	1	x	1	1	1	x	x
		Pyrimidine deoxyribonuleotide biosynthesis, CDP/CTP => dCDP/dCTP,dTDP/dTTP	M00053	1	1	x	x	1	x	x	x
		Pyrimidine degradation, uracil => beta-alanine, thymine => 3-aminoisobutanoate	M00046	x	x	x	x	x	x	x	x
	Serine and threonine metabolism	Serine biosynthesis, glycerate-3P => serine	M00020	x	x	x	1	1	x	x	x
		Threonine biosynthesis, aspartate => homoserine => threonine	M00018	1	x	x	x	x	x	x	x
		Betaine biosynthesis, choline => betaine	M00555	x	x	x	x	x	x	x	x
	Cysteine and methionine metabolism	Cysteine biosynthesis, serine => cysteine	M00021	x	x	x	x	x	x	x	x
		Cysteine biosynthesis, homocysteine + serine => cysteine	M00338	x	x	x	x	x	x	x	x
		Cysteine biosynthesis, methionine => cysteine	M00609	x	x	x	x	x	x	x	x
		Methionine biosynthesis, apartate => homoserine => methionine	M00017	x	x	x	x	x	x	x	x
		Methionine salvage pathway	M00034	x	x	x	x	x	x	x	x
		Methionine degradation	M00035	x	x	x	x, COGs	x	x	x	x
		Ethylene biosynthesis, methionine => ethylene	M00368	x	x	x	x	x	x	x	x
	Branched-chain amino acid metabolism	Valine/isoleucine biosynthesis, pyruvate => valine / 2-oxobutanoate => isoleucine	M00019	x	x	x	x	x	x	x	x
		Isoleucine biosynthesis, pyruvate => 2-oxobutanoate	M00535	x	x, COGs	x	x	x, COGs	x	x	x
		Isoleucine biosynthesis, threonine => 2-oxobutanoate => isoleucine	M00570	x	x	x	x	x	x	x	x
		Leucine biosynthesis, 2-oxoisovalerate => 2-oxoisocaproate	M00432	x	1	x	x	1	x	x	x
		Leucine degradation, leucine => acetoacetate + acetyl-CoA	M00036	x	x	x	x	x	x	x	x
	Lysine metabolism	Lysine biosynthesis, succinyl-DAP pathway, aspartate => lysine	M00016	x	x	x	x	x	x	x	x
		Lysine biosynthesis, acetyl-DAP pathway, aspartate => lysine	M00525	x	x	x	x	x	x	x	x
		Lysine biosynthesis, DAP dehydrogenase pathway, aspartate => lysine	M00526	x	x	x	x	x	x	x	x
		Lysine biosynthesis, DAP aminotransferase pathway, aspartate => lysine	M00527	x	1	x	x	1	x	x	x
		Lysine biosynthesis, AAA pathway, 2-oxoglutarate => 2-aminoadipate => lysine	M00030	x	x	x	x	x	x	x	x
		Lysine biosynthesis, 2-oxoglutarate => 2-oxoadipate	M00433	x	x	x	x	x	x	x	x
		Lysine biosynthesis, mediated by LysW, 2-aminoadipate => lysine	M00031	x	x	x	x	x	x	x	x
		Lysine degradation, lysine => saccharopine => acetoacetyl-CoA	M00032	x	x	x	x	x	x	x	x
	Arginine and proline metabolism	Proline biosynthesis, glutamate => proline	M00015	x	1	x	x	1	x	x	x
		Ornithine biosynthesis, glutamate => ornithine	M00028	x	x	x	x	x	x	x	x
		Ornithine biosynthesis, mediated by LysW, glutamate => ornithine	M00763	x	x	x	x	x	x	x	x
		Urea cycle	M00029	x	x	x	x	x	x	x	x
	Histidine metabolism	Histidine biosynthesis, PRPP => histidine	M00026	x	x	x	x	x	x	x	x
		Histidine degradation, histidine => N-formiminoglutamate => glutamate	M00045	x	x	x	x	1	x	x	x
	Aromatic amino acid metabolism	Shikimate pathway, phosphoenolpyruvate + erythrose-4P => chorismate	M00022	x	1	x	x	x, COG	x	x	x
		Tryptophan biosynthesis, chorismate => tryptophan	M00023	x	1	x	x, COG	x, COG	x	x	x
		Phenylalanine biosynthesis, chorismate => phenylalanine	M00024	x	1	x	x	x	x	x	x
		Tyrosine biosynthesis, chorismate => tyrosine	M00025	x	1	x	x	x	x	x	x
	Cofactor and vitamin biosynthesis	Thiamine biosynthesis, AIR => thiamine-P/thiamine-2P	M00127	x	x	x	x	x	x	x	x	B1
		Riboflavin biosynthesis, GTP => riboflavin/FMN/FAD	M00125	x	x	x	x	x	x	x	x	B2
		Pyridoxal biosynthesis, erythrose-4P => pyridoxal-5P	M00124	x	x	x	x	x	x	x	x	B6
		NAD biosynthesis, aspartate => NAD	M00115	x	x, COG	x	x, COG	x	x	x	x	B3
		Nicotinate degradation, nicotinate => fumarate	M00622	x	x	x	x	x	x	x	x	B5
		Pantothenate biosynthesis, valine/L-aspartate => pantothenate	M00119	x	1	x	1	1	x	x	x
		Coenzyme A biosynthesis, pantothenate => CoA	M00120	x	x	x	x	x	x	x	x
		Pimeloyl-ACP biosynthesis, BioC-BioH pathway, malonyl-ACP => pimeloyl-ACP	M00572	x	x	x	x	x	x	x	x
		Biotin biosynthesis, pimeloyl-ACP/CoA => biotin	M00123	x	x	x	x	x	x	x	x	B7
		Biotin biosynthesis, BioI pathway, long-chain-acyl-ACP => pimeloyl-ACP => biotin	M00573	x	x	x	x	x	x	x	x
		Biotin biosynthesis, BioW pathway, pimelate => pimeloyl-CoA => biotin	M00577	x	x	x	x	x	x	x	x
		Tetrahydrofolate biosynthesis, GTP => THF	M00126	x	x	x	x	x	x	x	x
		Heme biosynthesis, glutamate => protoheme/siroheme	M00121	x	x	x	x	x	x	x	x
		Ascorbate biosynthesis, animals, glucose-1P => ascorbate	M00129	x	x	x	x	x	x	x	x	C
		Ascorbate biosynthesis, plants, glucose-6P => ascorbate	M00114	x	x	x	x	x	x	x	x
		Ascorbate degradation, ascorbate => D-xylulose-5P	M00550	x	x	x	x	x	x	x	x
		Tocopherol/tocotorienol biosynthesis	M00112	x	x	x	x	x	x	x	x
		Cobalamin biosynthesis, cobinamide => cobalamin	M00122	x	x	x	x	x	x	x	x	B12
		Ubiquinone biosynthesis, prokaryotes, chorismate => ubiquinone	M00117	x	x	x	x	x	x	x	x
		Ubiquinone biosynthesis, eukaryotes, 4-hydroxybenzoate => ubiquinone	M00128	x	x	x	x	x	x	x	x
		Menaquinone biosynthesis, chorismate => menaquinone	M00116	x	x	x	x	x	x	x	x
		Glutathione biosynthesis, glutamate => glutathione	M00118	x	1	x	x	x	x	x	x
		C1-unit interconversion, prokaryotes	M00140	x	1	x	x	x	x	x	x
Secondary metabolism	Polyamine biosynthesis	Polyamine biosynthesis, arginine => agmatine => putrescine => spermidine	M00133	1	x	x	x	1	x	x	x
		Polyamine biosynthesis, arginine => ornithine => putrescine	M00134	x	x	x	x	x	x	x	x
		GABA biosynthesis, eukaryotes, putrescine => GABA	M00135	x	x	x	x	x	x	x	x
		GABA biosynthesis, prokaryotes, putrescine => GABA	M00136	x	x	x	x	x	x	x	x
	Aromatics degradation	All pathways		x	x	x	x	x	x	x	x
	Biosynthesis of secondary metabolites	All pathways		x	x	x	x	x	x	x	x
A Structural complex
Energy metabolism	Photosynthesis	All systems		x	x	x	x	x	x	x	x
	ATP synthesis	F-type ATPase, prokaryotes and chloroplasts	M00157	1	1	1	1	1	1	x	1
Genetic information processing	DNA polymerase	DNA polymerase III complex, bacteria	M00260	x	x	x	x	x	x	x	x
	RNA polymerase	RNA polymerase, bacteria	M00183	x	x	x	x	x	x	x	x
	RNA processing	RNA degradosome	M00394	x	x	x	x	x	x	x	x
	Ribosome	Ribosome, bacteria	M00178	L30, L7, S21	L30, L7, L33	x	L30, L7, L9	L30, some L1, S21	L30, L7, L9	x	L33,L30,L7,L9
	Proteasome	Bacterial proteasome	M00342	x	x	x	x	x	x	x	x
Environmental information processing	Mineral and organic ion transport system	NitT/TauT family transport system	M00188	1	1		x	1	x	x	x
		Putative hydroxymethylpyrimidine transport system	M00442	x	x	x	x	x	x	x	x
	Saccharide, polyol, and lipid transport system	Putative multiple sugar transport system	M00207	x	x	x	x	x	x	x	x
		ABC-type polysaccharide/polyol phosphate transport	COG	1	x		1	x
		Putative ABC transport system	M00211	x	x	x	1	x	x	x	x
	Phosphate and amino acid transport system	Branched-chain amino acid transport system	M00237	x	1	x	x	1	x	x	x
		Putative polar amino acid transport system	M00236	x	x	x	x	1	x	x	x
	Peptide and nickel transport system	Peptides/nickel transport system	M00239	x	x	x	x	x	x	x	x
	Metallic cation, iron-siderophore and vitamin B12 transport system	Iron complex transport system	M00240	x	x	x	x	x	x	x	x
		Zinc transport system	M00242	1	1	x	1	1	x	x	1
		Energy-coupling factor transport system	M00582	x	x	x	x	x	x	x	x
		Putative ABC transport system	M00247	x	x	x	x	x	x	x	x
	ABC-2 type and other transport systems	Lipopolysaccharide transport system	M00250	1	1	x	1	1	x	x	x
		Oleandomycin transport system	M00634	x	x	x	x	x	x	x	x
		Cell division transport system	M00256	1	1	1	1	1	1	1	1
		Putative ABC transport system	M00258	1	1	1	1	1	1	1	1
		ABC-2 type transport system	M00254	1	1	1	1	1	1	1	1
	Drug efflux transporter/pump	All systems		x	x	x	x	x	x	x	x
	Phosphotransferase system (PTS)	All systems		x	x	x	x	x	x	x	x
	Bacterial secretion system	Type II general secretion system	M00331	GspA,E,G,H,I, PilD	GspA,E,G,H,I,L, PilD	PilD	GspG, PilD	GspA,E,G,H,I,L, PilD	GspE,G, PilD	x	GspG, PilD
		Sec (secretion) system	M00335	1	1	1	1	1	1	1	1
		Twin-arginine translocation (Tat) system	M00336	x	x	x	x	x	x	x	x
		Competence-related DNA transformation transporter	M00429	x	x	x	x	x	x	x	x
A Functional set
Metabolism	Aminoacyl tRNA	Aminoacyl-tRNA biosynthesis, prokaryotes	M00360	proS	lysK, asnS		asnS, lysS, proS	asnS, lysS, proS	aspS, proS, asnS		asnS, lysS, proS
	Nucleotide sugar	Nucleotide sugar biosynthesis, prokaryotes	M00362	x	x	x	x	x	x	x	x
		Nucleotide sugar biosynthesis, eukaryotes	M00361	x	x	x	x	x	x	x	x
Environmental information processing	Two-component regulatory system	CusS-CusR (copper tolerance) two-component regulatory system	M00452	x	x	x	1	x	x	x	x
		PhoR-PhoB (phosphate starvation response) two-component regulatory system		x	1	x	x	1	1	x	x
	Drug efflux transporter/pump	All systems		x	x	x	x	x	x	x	x
	Drug resistance	Fluoroquinolone resistance, gyrase-protecting protein Qnr	M00729	x	x	x	x	x	1	x	x
		Aminoglycoside resistance, protease HtpX	M00743	x	x	x	x	x	x	x	x
Transport	Transport	mgtA, mgtB; Mg2+-importing ATPase [E3.6.3.2]	K01531	1	1	x	1	1	x	x	1
		Ca2+-transporting ATPase [EC:3.6.3.8]	K01537	1	1	x	1	1	1	x	1
		zntA; Cd2+/Zn2+-exporting ATPase [EC:3.6.3.3 3.6.3.5]	K01534	x	1	x	1	1	1	x	x
		ATP7, copA; Cu2+-exporting ATPase [EC:3.6.3.4]	K01533	x	x	x	1	1	x	x	x
		mscL; large conductance mechanosensitive channel	K03282	1	1	x	1	1	1	1	1
		TC.MIT; metal ion transporter, MIT family	K03284	1	1	x	1	1	1	x	x
		TC.DME; drug/metabolite transporter, DME family	K03298	1	1	x	1	1	1	x	1
		TC.HAE1; hydrophobic/amphiphilic exporter-1 (mainly G- bacteria), HAE1 family	K03296	x	1	x	1	1	x	x	x
		MFS.SET; MFS transporter, SET family, sugar efflux transporter	K03291	x	x	x	x	1	x	x	x
		mntH; manganese transport protein	K03322	1	1	x	1	1	1	1	x
		TC.AMT; ammonium transporter, Amt family	K03320	x	1	x	x	1	x	x	x
		TC.PIT; inorganic phosphate transporter, PiT family	K03306	x	x	x	x	1	x	x	x
		TC.PST; polysaccharide transporter, PST family	K03328	1	1	1	1	1	x	x	1
		nepI; MFS transporter, DHA1 family, purine ribonucleoside efflux pump	K03445	1	x	x	x	x	x	x	x
		kup; KUP system potassium uptake protein	K03549	x	1	x	x	1	1	x	x
		fur; Fur family transcriptional regulator, ferric uptake regulator	K03711	1	1	1	1	1	1	x	x
		tyrR; transcriptional regulator of aroF, aroG, tyrA and aromatic amino acid transport	K03721	x	1	x	x	x	x	x	x
		pnuC; nicotinamide mononucleotide transporter	K03811	x	x	x	1	1	x	x	x
		tyrP; tyrosine-specific transport protein	K03834	1	x	x	x	1	x	x	1
		feoB; ferrous iron transport protein B	K04759	1	x	x	x	x	x	x	1
		modF; molybdate transport system ATP-binding protein	K05776	x	x	x	1	1	x	x	x
		blt, norA; MFS transporter, DHA1 family, multidrug resistance protein	K08153	1	1	1	1	1	x	x	1
		hcaT; MFS transporter, PPP family, 3-phenylpropionic acid transporter	K05820	1	1	x	1	1	1	x	x
		mdtG; MFS transporter, DHA1 family, multidrug resistance protein	K08161	1	1	x	x	1	x	x	x
		ybcL; MFS transporter, DHA1 family, chloramphenicol resistance protein	K08164	x	x	x	x	1	x	x	x
		mmr; MFS transporter, DHA2 family, methylenomycin A resistance protein	K08166	x	x	x	x	1	1	x	x
		smvA; MFS transporter, DHA2 family, methyl viologen resistance protein SmvA	K08167	x	x	x	x	x	1	x	x
		glcP; MFS transporter, FHS family, glucose/mannose:H+ symporter	K08174	x	x	x	x	1	x	x	x
		oxlT; MFS transporter, OFA family, oxalate/formate antiporter	K08177	x	x	x	x	1	x	x	x
		focA; formate transporter	K06212	x	1	x	1	x	x	x	x
		TC.ZIP; zinc transporter, ZIP family	K07238	1	1	1	1	1	1	x	x
		FTR1; high-affinity iron transporter	K07243	x	1	x	1	x	x	x	x
		tetA; MFS transporter, DHA1 family, tetracycline resistance protein	K08151	1	1	x	1	1	1	1	1
		blt, norA; MFS transporter, DHA1 family, multidrug resistance protein	K08153	1	1	1	1	1	x	x	1
		mdtG; MFS transporter, DHA1 family, multidrug resistance protein	K08161	1	1	x	x	1	x	x	x
		mgtE; magnesium transporter	K06213	1	1	x	x	1	1	x	x
		TC.HME; heavy-metal exporter, HME family	K07239	1	1	x	1	1	x	x	x
		mgtC; putative Mg2+ transporter-C (MgtC) family protein	K07507	1	x	x	x	1	x	x	x
		bcr; MFS transporter, DHA1 family, bicyclomycin/chloramphenicol resistance protein	K07552	1	1	x	x	1	x	x	x
		yqgE; MFS transporter, YQGE family, putative transporter	K08222	1	1	x	1	1	x	x	1
		fsr; MFS transporter, FSR family, fosmidomycin resistance protein	K08223	1	1	x	1	1	1	x	x
		mef; MFS transporter, DHA3 family, macrolide efflux protein	K08217	x	x	1	1	1	1	x	1
		entS; MFS transporter, ENTS family, enterobactin (siderophore) exporter	K08225	x	1	x	1	1	x	x	x
		merT; mercuric ion transport protein	K08363	x	x	x	x	1	x	x	x
		ABC-2.LPSE.P; lipopolysaccharide transport system permease protein	K09690	1	1	x	1	1	1	x	x
		ABC-2.LPSE.A; lipopolysaccharide transport system ATP-binding protein	K09691	1	1	x	1	1	1	x	x
		ABC.MN.A; manganese/iron transport system ATP-binding protein	K09820	1	x	x	x	x	x	x	x
		zur; Fur family transcriptional regulator, zinc uptake regulator	K09823	x	1	x	x	x	x	x	x
		artP; arginine transport system ATP-binding protein [EC:3.6.3.-]	K10000	x	x	x	x	x	1	x	x
		kch; voltage-gated potassium channel	K10716	x	1	x	x	1	1	x	x
		potD; spermidine/putrescine transport system substrate-binding protein	K11069	x	1	x	x	x	x	x	x
		tqsA; AI-2 transport protein TqsA	K11744	x	1	x	1	1	x	x	x
		msmX, msmK; maltose/maltodextrin transport system ATP-binding protein	K10112	x	x	x	x	1	x	x	x
		ctpE; cation-transporting ATPase E [EC:3.6.3.-]	K12952	x	x	x	x	1	1	x	x
		ABC-2.CYL.A, cylA; multidrug/hemolysin transport system ATP-binding protein	K11050	x	x	x	x	x	1	x	x
		rhtA; inner membrane transporter RhtA	K11939	x	x	x	x	x	x	x	1
Transcriptional-Regulator	Transcriptional-Regulator	fur; Fur family transcriptional regulator, ferric uptake regulator	K03711	1	1	1	1	1	1	x	x
		trpR; TrpR family transcriptional regulator, trp operon repressor	K03720	1	1	x	1	1	1	x	x
		arsR; ArsR family transcriptional regulator	K03892	1	1	x	1	1	1	x	1
		putative transcriptional regulator	K07727	1	1	x	x	1	x	x	x
		putative transcriptional regulator	K07729	1	1	x	1	1	1	x	1
		padR; PadR family transcriptional regulator, regulatory protein PadR	K10947	1	1	x	x	x	x	x	x
		iscR; Rrf2 family transcriptional regulator, iron-sulfur cluster assembly transcription factor	K13643	1	1	x	x	x	x	x	x
		nsrR; Rrf2 family transcriptional regulator, nitric oxide-sensitive transcriptional repressor	K13771	1	1	x	1	x	x	x	x
		zurR, zur; Fur family transcriptional regulator, zinc uptake regulator	K02076	x	1	x	x	1	x	x	x
		troR; DtxR family transcriptional regulator, Mn-dependent transcriptional regulator	K03709	x	1	x	1	x	x	x	x
		tyrR; transcriptional regulator of aroF, aroG, tyrA and aromatic amino acid transport	K03721	x	1	x	x	x	x	x	x
		slyA; MarR family transcriptional regulator, transcriptional regulator for hemolysin	K06075	x	1	x	1	1	1	x	x
		perR; Fur family transcriptional regulator, peroxide stress response regulator	K09825	x	1	x	x	x	1	x	x
		ada; AraC family transcriptional regulator, regulatory protein of adaptative response / methylated-DNA-[protein]-cysteine methyltransferase [EC:2.1.1.63]	K10778	x	1	x	x	1	x	x	x
		fnr; CRP/FNR family transcriptional regulator, anaerobic regulatory protein	K01420	x	x	x	1	x	x	x	x
		nadR; HipB family transcriptional regulator, involved in the regulation of NAD biosynthesis	K06211	x	x	x	1	1	x	x	x
		lrp; Lrp/AsnC family transcriptional regulator, leucine-responsive regulatory protein	K03719	x	x	x	x	1	x	x	x
		algH; putative transcriptional regulator	K07735	x	x	x	x	1	x	x	x
		flrA; sigma-54 specific transcriptional regulator, flagellar regulatory protein A	K10941	x	x	x	x	1	x	x	x
		padR; PadR family transcriptional regulator, regulatory protein PadR	K10947	x	x	x	x	1	x	1	x
		fnr; CRP/FNR family transcriptional regulator, anaerobic regulatory protein	K01420	x	x	x	x	x	1	x	x
		ysiA, fadR; TetR/AcrR family transcriptional regulator, fatty acid metabolism regulator protein	K13770	x	x	x	x	x	1	x	x
Sigma-Factors	Sigma-Factors	fliA; RNA polymerase sigma factor for flagellar operon FliA	K02405	1	1	x	x	1	x	x	x
		rpoD; RNA polymerase primary sigma factor	K03086	1	1	1	1	1	1	x	1
		rpoE; RNA polymerase sigma-70 factor, ECF subfamily	K03088	1	1	x	1	1	1	1	1
		yhbH; putative sigma-54 modulation protein	K05808	1	1	1	1	1	1	x	x
		rseP; regulator of sigma E protease [EC:3.4.24.-]	K11749	1	x	1	1	1	1	1	1
		rsbV; anti-sigma B factor antagonist	K04749	x	1	x	x	1	x	x	x
		rsbW; anti-sigma B factor [EC:2.7.11.1]	K04757	x	1	x	x	x	x	x	x
		spoIIAA; stage II sporulation protein AA (anti-sigma F factor antagonist)	K06378	x	1	x	x	x	x	x	x
		rsbU; sigma-B regulation protein RsbU (phosphoserine phosphatase)	K07315	x	1	x	1	x	x	x	x
		rpoH; RNA polymerase sigma-32 factor	K03089	x	x	1	x	x	x	x	x
		RNA polymerase sporulation-specific sigma factor	K03091	x	x	x	x	1	x	x	x
Light	Light	crtB; phytoene synthase [EC:2.5.1.32]	K02291	1	x	x	x	1	1	1	x
		RETSAT; all-trans-retinol 13,14-reductase [EC:1.3.99.23]	K09516	1	1	x	x	x	x	x	x
		crtI; phytoene dehydrogenase [EC:1.14.99.-]	K10027	1	1	x	1	1	1	x	x
		E4.1.99.3, phrB; deoxyribodipyrimidine photo-lyase [EC:4.1.99.3]	K01669	x	1	x	x	1	1	1	1
		splB; spore photoproduct lyase [EC:4.1.99.-]	K03716	x	1	x	x	x	x	x	x
		PDS, crtP; phytoene dehydrogenase, phytoene desaturase [EC:1.14.99.-]	K02293	x	x	x	1	x	x	x	1
		SOP; sensory rhodopsin	K04643	x	x	x	x	1	1	x	x
		RDH12; retinol dehydrogenase 12 [EC:1.1.1.-]	K11153	x	x	x	x	1	x	x	x
		bchR; bacteriochlorophyll C12 methyltransferase [EC:2.1.1.-]	K13602	x	x	x	x	1	x	x	x
Sulfur	Sulfur	cysC; adenylylsulfate kinase [EC:2.7.1.25]	K00860	1	1	x	x	x	1	x	x
		glpE; thiosulfate sulfurtransferase [EC:2.8.1.1]	K02439	1	1	x	1	1	x	1	x
		TC.SULP; sulfate permease, SulP family	K03321	1	x	x	x	x	x	x	x
		iscS, NFS1; cysteine desulfurase [EC:2.8.1.7]	K04487	1	1	x	1	1	1	x	x
		sufS; cysteine desulfurase / selenocysteine lyase [EC:2.8.1.7 4.4.1.16]	K11717	1	1	1	1	1	x	1	1
		iscR; Rrf2 family transcriptional regulator, iron-sulfur cluster assembly transcription factor	K13643	1	1	x	x	x	x	x	x
		GNS; N-acetylglucosamine-6-sulfatase [EC:3.1.6.14]	K01137	x	1	x	x	x	x	x	x
		ychN; uncharacterized protein involved in oxidation of intracellular sulfur	K06039	x	1	x	1	x	x	x	x
		TC.SULP; sulfate permease, SulP family	K03321	x	x	x	1	1	1	1	1
		met3; sulfate adenylyltransferase [EC:2.7.7.4]	K00958	x	x	x	x	1	x	x	x
		sufE; cysteine desulfuration protein SufE	K02426	x	x	x	x	x	x	1	x
Iron	Iron	E1.18.1.2, fpr; ferredoxin--NADP+ reductase [EC:1.18.1.2]	K00528	1	x	x	x	x	x	x	x
		hcaD; ferredoxin--NAD+ reductase [EC:1.18.1.3]	K00529	1	x	x	x	x	x	x	x
		fur; Fur family transcriptional regulator, ferric uptake regulator	K03711	1	1	1	1	1	1	x	x
		feoB; ferrous iron transport protein B	K04759	1	x	x	x	x	x	x	1
		fer; ferredoxin	K05337	1	1	1	1	1	x	x	1
		hcaC; ferredoxin subunit of phenylpropionate dioxygenase	K05710	1	1	x	x	x	x	x	x
		ABC.MN.A; manganese/iron transport system ATP-binding protein	K09820	1	x	x	x	x	x	x	x
		iscR; Rrf2 family transcriptional regulator, iron-sulfur cluster assembly transcription factor	K13643	1	1	x	x	x	x	x	x
		korA; 2-oxoglutarate ferredoxin oxidoreductase subunit alpha [EC:1.2.7.3]	K00174	x	1	x	1	1	x	x	x
		korB; 2-oxoglutarate ferredoxin oxidoreductase subunit beta [EC:1.2.7.3]	K00175	x	1	x	1	1	x	1	x
		ABC.FEV.S; iron complex transport system substrate-binding protein	K02016	x	1	x	x	x	x	x	x
		fdx; ferredoxin, 2Fe-2S	K04755	x	1	x	x	x	x	x	x
		FTR1; high-affinity iron transporter	K07243	x	1	x	1	x	x	x	x
		fieF; ferrous-iron efflux pump FieF	K13283	x	1	x	1	x	x	x	x
		korD; 2-oxoglutarate ferredoxin oxidoreductase subunit delta [EC:1.2.7.3]	K00176	x	x	x	1	x	x	x	x
		porA; pyruvate ferredoxin oxidoreductase, alpha subunit [EC:1.2.7.1]	K00169	x	x	x	x	1	x	x	x
		porG; pyruvate ferredoxin oxidoreductase, gamma subunit [EC:1.2.7.1]	K00172	x	x	x	x	1	x	x	x
		bfd; bacterioferritin-associated ferredoxin	K02192	x	x	x	x	1	x	x	x
		ABC.FE.A; iron(III) transport system ATP-binding protein [EC:3.6.3.30]	K02010	x	x	x	x	x	1	x	x
		korG; 2-oxoglutarate ferredoxin oxidoreductase subunit gamma [EC:1.2.7.3]	K00177	x	x	x	x	x	x	1
		E1.18.1.2, fpr; ferredoxin--NADP+ reductase [EC:1.18.1.2]	K00528	x	x	x	x	x	x	1	1
Nitrogen	Nitrogen	nirB; nitrite reductase (NAD(P)H) large subunit [EC:1.7.1.4]	K00362	1	x	x	x	1	x	x	x
		nitrilase [EC:3.5.5.1]	K01501	1	x	x	x	x	x	x	x
		ABC.SN.A, ssuB, tauB; sulfonate/nitrate/taurine transport system ATP-binding protein	K02049	1	1	x	1	1	1	x	x
		ABC.SN.P, ssuC, tauC; sulfonate/nitrate/taurine transport system permease protein	K02050	1	1	x	x	1	x	x	x
		ABC.SN.S, ssuA, tauA; sulfonate/nitrate/taurine transport system substrate-binding protein	K02051	1	1	x	1	1	x	x	x
		iscU, nifU; nitrogen fixation protein NifU and related proteins	K04488	1	1	1	1	1	x	x	1
		nfnB, nfsB; nitroreductase / dihydropteridine reductase [EC:1.-.-.- 1.5.1.34]	K10679	1	1	x	x	1	x	1	x
		nsrR; Rrf2 family transcriptional regulator, nitric oxide-sensitive transcriptional repressor	K13771	1	1	x	1	x	x	x	x
		nitrite reductase (NO-forming) [EC:1.7.2.1]	K00368	x	x	x	1	1	x	x	x
		YHB1, hmp; nitric oxide dioxygenase [EC:1.14.12.17]	K05916	x	x	x	1	x	x	x	x
		narK, narU, nasA; MFS transporter, NNP family, nitrate/nitrite transporter	K02575	x	x	x	x	1	x	x	x
		glnB; nitrogen regulatory protein P-II 1	K04751	x	x	x	x	1	x	x	x
		rutE; putative NADH dehydrogenase/NAD(P)H nitroreductase RutE [EC:1.-.-.-]	K09019	x	x	x	x	1	x	x	x
		glnL, ntrB; two-component system, NtrC family, nitrogen regulation sensor histidine kinase GlnL [EC:2.7.13.3]	K07708	x	x	x	x	x	1	x	x

## Sheet: Table_S6
Back to index
Supplementary Table 5. Recruitment results (coverage per Gbp) for all bins versus all samples analyzed in this study.
Bin	AE-03may19	AE-24oct19	AH-03may19	AH-24oct19	Baikal-1250m	Baikal-1350m	Baikal-20m	Baikal-5m	CE-Jul18	CE-Oct18	CH-Jul18	CH-Oct18	GE-03apr19	GE-07nov19	GH-07nov19	Ike-100	Ike-150	Ike-200	Ike-50	Ike-5	Jr-03apr18	Jr-08jan18	Jr-11dec17	Jr-11may16	Jr-12mar18	Jr-14may18	Jr-16oct17	Jr-19feb18	Jr-20nov17	Jr-23apr18	Jr-25may17	Jr-28aug17	Jr-28jun17	Jr-29jan18	Jr-7aug17	LBG_augE	LBG_decH	LBG_julE	LBG_novH	LBG_octH	LBG_sepE	LBG_sepH	LE-02apr19	LE-05nov19	LH-02apr19	LH-05nov19	MaE-04nov19	MaE-09apr19	Mag-171016-100
AE-03may19-31	0.5	0	0.37	0.52	0	0.01	0	0	0	0	0.11	0.09	0	0	0	0.01	0	0	0	0	0	0	0	0	0	0	0	0	0	0	0	0	0	0	0	0	0.02	0	0.01	0.01	0	0	0.01	0	0.03	0.03	0	0.05	0.52
AH-03may19-119	0.17	0	0.33	0.64	0	0	0	0	0	0	0.01	0.01	0	0	0	0.01	0	0	0	0	0	0	0.01	0	0	0	0	0	0	0	0	0	0	0	0	0	0	0	0	0	0	0	0	0	0.01	0.01	0	0	0.02
AH-03may19-31	0.02	0	0.25	0.19	0	0	0	0	0	0	0	0	0	0	0	0	0	0	0	0	0	0	0	0	0	0	0	0	0	0	0	0	0	0	0	0	0	0	0	0	0	0	0	0	0	0	0	0	0
AH-03may19-8	0.04	0	0.23	0.04	0	0	0	0	0	0	0.11	0.02	0	0	0	0	0	0	0	0	0	0	0	0	0	0	0	0	0	0	0	0	0	0	0	0	0	0	0.01	0	0	0.01	0	0	0	0.01	0	0	0.04
AH-24oct19-230	0.06	0	0.18	0.26	0.02	0.03	0.01	0.01	0.01	0	0.08	0.12	0	0	0	0.01	0.01	0	0	0	0	0	0	0	0	0	0	0	0	0	0	0	0	0	0	0	0.01	0	0.01	0.01	0	0	0.01	0	0.04	0.01	0.01	0.02	0.04
AH-24oct19-282	0	0	0.05	0.25	0	0	0	0	0	0	0	0	0	0	0	0.01	0	0	0	0	0	0	0	0	0	0	0	0	0	0	0	0	0	0	0	0	0	0	0	0	0	0	0	0	0	0	0	0	0.01
AH-24oct19-37	0.06	0	0.13	0.84	0	0	0	0	0	0	0.07	0.19	0	0	0	0	0	0	0	0	0	0	0	0	0	0	0	0	0	0	0	0	0	0	0	0	0	0	0	0	0	0	0	0	0	0.04	0	0	0
Baikal-1250m-152	0	0	0	0	0.24	0.23	0	0	0	0	0	0	0	0	0	0	0	0	0	0	0	0	0	0	0	0	0	0	0	0	0	0	0	0	0	0	0	0	0	0	0	0	0	0	0	0	0	0	0
Baikal-1250m-192	0	0	0	0	0.34	0.7	0	0	0	0	0	0	0	0	0	0.01	0.01	0	0	0	0	0	0	0	0	0	0	0	0	0	0	0	0	0	0	0	0	0	0	0	0	0	0	0	0	0	0	0	0.07
Baikal-1250m-222	0	0	0	0	0.37	0.42	0	0	0	0	0	0	0	0	0	0	0	0	0	0	0	0	0	0	0	0	0	0	0	0	0	0	0	0	0	0	0	0	0	0	0	0	0	0	0	0	0	0	0
Baikal-1250m-338	0	0	0	0	0.34	0.47	0.02	0.02	0	0	0	0	0	0	0	0	0	0	0	0	0	0	0	0	0	0	0	0	0	0	0	0	0	0	0	0	0	0	0	0	0	0	0	0	0	0	0	0	0
Baikal-1250m-373	0	0	0	0	0.19	0.29	0	0	0	0	0	0	0	0	0	0	0	0	0	0	0	0	0	0	0	0	0	0	0	0	0	0	0	0	0	0	0	0	0	0	0	0	0	0	0	0	0	0	0.06
Baikal-1250m-46	0	0	0	0	0.96	1.23	0	0	0	0	0	0	0	0	0	0	0	0	0	0	0	0	0	0	0	0	0	0	0	0	0	0	0	0	0	0	0	0	0	0	0	0	0	0	0	0	0	0	0
Baikal-1350m-104	0.02	0	0.02	0.02	0.2	0.26	0	0	0	0	0.04	0.07	0	0	0	0.01	0	0	0.01	0	0	0	0	0	0	0	0	0	0	0	0	0	0	0	0	0	0.05	0	0.02	0.02	0	0.02	0	0	0	0	0	0	0.21
Baikal-1350m-131	0	0	0	0	0.42	0.5	0	0	0	0	0	0	0.01	0	0	0.01	0	0	0	0	0	0	0	0	0	0	0	0	0	0	0	0	0	0	0	0	0	0	0	0	0	0	0	0	0	0	0	0	0
Baikal-1350m-133	0	0	0	0	0.14	0.25	0	0	0	0	0	0	0	0	0	0	0	0	0	0	0	0	0	0	0	0	0	0	0	0	0	0	0	0	0	0	0	0	0	0	0	0	0	0	0	0	0	0	0
Baikal-1350m-162	0	0	0	0	0.39	0.42	0	0	0	0	0	0	0	0	0	0	0	0	0	0	0	0	0	0	0	0	0	0	0	0	0	0	0	0	0	0	0	0	0	0	0	0	0	0	0	0	0	0	0
Baikal-1350m-263	0	0	0	0	0.6	0.97	0	0	0	0	0	0	0	0	0	0.04	0.02	0.01	0.01	0	0	0	0	0	0	0	0	0	0	0	0	0	0	0	0	0	0	0	0	0	0	0	0	0	0	0	0	0	0.01
Baikal-1350m-280	0	0	0	0	0.16	0.34	0	0	0	0	0	0	0	0	0	0	0	0	0	0	0	0	0	0	0	0	0	0	0	0	0	0	0	0	0	0	0	0	0	0	0	0	0	0	0	0	0	0	0
Baikal-1350m-319	0	0	0	0	0.08	0.18	0	0	0	0	0	0	0	0	0	0.02	0.01	0	0	0	0	0	0	0	0	0	0	0	0	0	0	0	0	0	0	0	0	0	0	0	0	0	0	0	0	0	0	0	0
Baikal-1350m-357	0	0	0	0	0.27	0.28	0.01	0.01	0	0	0	0	0	0	0	0.01	0	0	0	0	0	0	0	0	0	0	0	0	0	0	0	0	0	0	0	0	0	0	0	0	0	0	0	0	0	0	0	0	0
Baikal-1350m-369	0	0	0	0	0.06	0.12	0	0	0	0	0	0	0	0	0	0	0	0	0	0	0	0	0	0	0	0	0	0	0	0	0	0	0	0	0	0	0	0	0	0	0	0	0	0	0	0	0	0	0
Baikal-1350m-53	0	0	0	0	0.21	0.28	0	0	0	0	0	0	0	0	0	0	0	0	0	0	0	0	0	0	0	0	0	0	0	0	0	0	0	0	0	0	0	0	0	0	0	0	0	0	0	0	0	0	0
Baikal-deep-G183	0	0	0	0	0.45	0.42	0.09	0.08	0	0	0	0	0	0	0	0.01	0	0	0.66	0.03	0	0	0	0	0	0	0	0	0	0	0	0	0	0	0	0	4.84	0	2.71	2.43	0	1.51	0	0	0	0	0	0	0
Baikal-deep-G184	0	0	0	0	0.21	0.4	0	0	0	0	0	0	0	0	0	0	0	0	0	0	0	0	0	0	0	0	0	0	0	0	0	0	0	0	0	0	0	0	0	0	0	0	0	0	0	0	0	0	0
Baikal-deep-G186	0	0	0	0	0.06	0.1	0	0	0	0	0	0	0	0	0	0	0	0	0	0	0	0	0	0	0	0	0	0	0	0	0	0	0	0	0	0	0	0	0	0	0	0	0	0	0	0	0	0	0
Baikal-deep-G188	0	0	0	0	0.07	0.1	0	0	0	0	0	0	0	0	0	0.05	0.03	0	0	0	0	0	0	0	0	0	0	0	0	0	0	0	0	0	0	0	0	0	0	0	0	0	0	0	0	0	0	0	0.03
Baikal-deep-G192	0.01	0	0.01	0.04	0.08	0.13	0	0	0	0	0.19	0.18	0	0	0	0	0	0	0	0	0	0	0	0	0	0	0	0	0	0	0	0	0	0	0	0	0	0	0	0	0	0	0	0	0	0	0	0.02	0.61
Baikal-deep-G193	0.01	0.01	0	0	0.1	0.17	0.12	0.09	0.07	0.02	0.01	0	0	0	0	0	0	0	0	0	0	0	0	0.03	0	0	0	0	0	0.14	0.01	0	0	0	0.02	0	0	0	0	0	0.01	0	0.01	0	0.01	0	0	0	0
Baikal-deep-G194	0	0	0	0	0.06	0.11	0	0	0	0	0	0	0	0	0	0	0	0	0	0	0	0	0	0	0	0	0	0	0	0	0	0	0	0	0	0	0	0	0	0	0	0	0	0	0	0	0	0	0
Baikal-deep-G203	0	0	0	0	0.07	0.1	0	0	0	0	0	0	0	0	0	0	0	0	0	0	0	0	0	0	0	0	0	0	0	0	0	0	0	0	0	0	0	0	0	0	0	0	0	0	0	0	0	0	0
Baikal-deep-G206	0	0	0	0	0.08	0.12	0	0	0	0	0	0	0	0	0	0	0	0	0	0	0	0	0	0	0	0	0	0	0	0	0	0	0	0	0	0	0	0	0	0	0	0	0	0	0	0	0	0	0
Baikal-deep-G209	0	0	0	0	0.18	0.26	0	0	0	0	0	0	0	0	0	0	0	0	0	0	0	0	0	0	0	0	0	0	0	0	0	0	0	0	0	0	0	0	0	0	0	0	0	0	0	0	0	0	0
Baikal-deep-G211	0	0	0	0	0.12	0.14	0	0	0	0	0	0	0	0	0	0	0	0	0	0	0	0	0	0	0	0	0	0	0	0	0	0	0	0	0	0	0	0	0	0	0	0	0	0	0	0	0	0	0
Baikal-deep-G212	0	0	0	0	0.06	0.09	0	0	0	0	0	0	0	0	0	0	0	0	0	0	0	0	0	0	0	0	0	0	0	0	0	0	0	0	0	0	0	0	0	0	0	0	0	0	0	0	0	0	0
Biwa-bin1	0	0	0	0	0	0	0	0	0	0	0	0	0	0	0	0.01	0.01	0	0.02	0.38	0	0	0	0	0	0	0	0	0	0	0	0	0	0	0	1.34	0.11	0	0.12	0.2	1.64	0.02	0	0	0	0	0	0	0
Biwa-bin2	0	0	0	0	0.42	0.39	0.09	0.08	0	0	0	0	0	0	0	0.02	0	0	0.66	0.03	0	0	0	0	0	0	0	0	0	0	0	0	0	0	0	0	4.94	0	2.77	2.47	0	1.54	0	0	0	0	0	0	0
CH-Jul18-31	0	0	0	0.01	0	0	0	0	0	0	0.16	0.14	0	0	0	0	0	0	0	0	0	0	0	0	0	0	0	0	0	0	0	0	0	0	0	0	0	0	0	0	0	0	0	0	0	0	0	0	0.27
CH-Oct18-100	0	0	0	0	0	0	0	0	0	0	0.08	0.19	0	0	0	0	0	0	0	0	0	0	0	0	0	0	0	0	0	0	0	0	0	0	0	0	0	0	0	0	0	0	0	0	0	0	0	0	0
CH-Oct18-118	0	0	0.01	0.03	0	0	0	0	0	0	0.22	0.32	0	0	0	0	0	0	0	0	0	0	0	0	0	0	0	0	0	0	0	0	0	0	0	0	0	0	0	0	0	0	0	0	0.01	0.02	0	0.08	0.15
CH-Oct18-39	0	0	0	0	0	0	0	0	0	0	0.04	0.21	0	0	0	0	0	0	0	0	0	0	0	0	0	0	0	0	0	0	0	0	0	0	0	0	0	0	0	0	0	0	0	0	0	0	0	0	0
CH-Oct18-50	0	0	0	0	0	0	0	0	0	0	0.76	0.2	0	0	0	0	0	0	0	0	0	0	0	0	0	0	0	0	0	0	0	0	0	0	0	0	0	0	0	0	0	0	0	0	0	0	0	0	0
CH-Oct18-75	0	0	0	0	0	0	0	0	0	0	0.23	0.35	0	0	0	0	0	0	0	0	0	0	0	0	0	0	0	0	0	0	0	0	0	0	0	0	0	0	0	0	0	0	0	0	0	0	0	0	0
CH-Oct18-76	0	0	0	0	0	0	0	0	0	0	0.06	0.2	0	0	0	0.03	0.01	0	0.01	0	0	0	0.01	0	0	0	0	0.01	0	0	0	0	0	0	0	0	0	0	0	0	0	0	0	0	0	0	0	0	0.01
CH-Oct18-95	0.06	0	0.13	0.81	0	0	0	0	0	0	0.07	0.21	0	0	0	0.02	0.01	0.01	0	0	0	0	0	0	0	0	0	0	0	0	0	0	0	0	0	0	0	0	0	0	0	0	0	0	0	0.05	0	0	0
CH-Oct18-96	0.07	0	0.06	0.07	0.05	0.06	0	0	0	0	0.17	0.29	0	0	0	0.01	0.01	0	0	0	0	0	0	0	0	0	0	0	0	0	0	0	0	0	0	0	0	0	0	0	0	0	0	0	0	0	0	0.01	0.82
GH-07nov19-153	0	0	0	0	0	0	0	0	0	0	0	0	0	0.01	1.26	0	0	0	0	0	0	0	0	0	0	0	0	0	0	0	0	0	0	0	0	0	0	0	0	0	0	0	0	0	0	0	0	0	0
Ike-100m-1	0	0	0	0	0	0	0	0	0	0	0	0	0	0	0	3.49	1.3	0.1	0	0	0	0	0	0	0	0	0	0	0	0	0	0	0	0	0	0	0	0	0	0	0	0	0	0	0	0	0	0	0
Ike-100m-12	0	0	0	0	0	0	0	0	0	0	0	0	0	0	0	2.61	1.26	0.88	0.08	0	0	0	0	0	0	0	0	0	0	0	0	0	0	0	0	0	0	0	0	0	0	0	0	0	0	0	0	0	0
Ike-100m-2	0	0	0	0	0	0	0	0	0	0	0	0	0	0	0	6.8	1.65	0.74	0.09	0	0	0	0	0	0	0	0	0	0	0	0	0	0	0	0	0	0	0	0	0	0	0	0	0	0	0	0	0	0
Ike-100m-20	0	0	0	0	0	0	0	0	0	0	0	0	0	0	0	2.29	0.85	0.07	0.09	0	0	0	0	0	0	0	0	0	0	0	0	0	0	0	0	0	0	0	0	0	0	0	0	0	0	0	0	0	0
Ike-100m-30	0	0	0	0	0	0	0	0	0	0	0	0	0	0	0	3.31	1.81	0.82	0.06	0	0	0	0	0	0	0	0	0	0	0	0	0	0	0	0	0	0	0	0	0	0	0	0	0	0	0	0	0	0
Ike-100m-32	0	0	0	0	0	0	0	0	0	0	0	0	0	0	0	1.9	0.28	0.04	0	0	0	0	0	0	0	0	0	0	0	0	0	0	0	0	0	0	0	0	0	0	0	0	0	0	0	0	0	0	0
Ike-100m-33	0	0	0	0	0	0	0	0	0	0	0	0	0	0	0	2.06	1.27	0.84	0.05	0	0	0	0	0	0	0	0	0	0	0	0	0	0	0	0	0	0	0	0	0	0	0	0	0	0	0	0	0	0
Ike-100m-35	0	0	0	0	0	0	0	0	0	0	0	0	0	0	0	2.05	1.2	0.38	0.37	0	0	0	0	0	0	0	0	0	0	0	0	0	0	0	0	0	0	0	0	0	0	0	0	0	0	0	0	0	0
Ike-100m-40	0	0	0	0	0	0	0	0	0	0	0	0	0	0	0	2.72	1.33	1.11	0.06	0	0	0	0	0	0	0	0	0	0	0	0	0	0	0	0	0	0	0	0	0	0	0	0	0	0	0	0	0	0
Ike-100m-41	0	0	0	0	0	0	0	0	0	0	0	0	0	0	0	5.15	0.82	0.06	1.89	0	0	0	0	0	0	0	0	0	0	0	0	0	0	0	0	0	0	0	0	0	0	0	0	0	0	0	0	0	0
Ike-150m-21	0	0	0	0	0	0	0	0	0	0	0	0	0	0	0	3.82	2.33	0.11	0.74	0	0	0	0	0	0	0	0	0	0	0	0	0	0	0	0	0	0	0	0	0	0	0	0	0	0	0	0	0	0
Ike-150m-34	0	0	0	0	0	0	0	0	0	0	0	0	0	0	0	1	4.92	3.89	0.01	0	0	0	0	0	0	0	0	0	0	0	0	0	0	0	0	0	0	0	0	0	0	0	0	0	0	0	0	0	0
Ike-150m-44	0	0	0	0	0	0	0	0	0	0	0	0	0	0	0	0.22	2.26	3.9	0	0	0	0	0	0	0	0	0	0	0	0	0	0	0	0	0	0	0	0	0	0	0	0	0	0	0	0	0	0	0
Ike-150m-55	0	0	0	0	0	0	0	0	0	0	0	0	0	0	0	3.11	1.91	0.26	0.08	0	0	0	0	0	0	0	0	0	0	0	0	0	0	0	0	0	0	0	0	0	0	0	0	0	0	0	0	0	0
Ike-200m-19	0	0	0	0	0	0	0	0	0	0	0	0	0	0	0	0	0.69	1.92	0.01	0	0	0	0	0	0	0	0	0	0	0	0	0	0	0	0	0	0	0	0	0	0	0	0	0	0	0	0	0	0
Ike-200m-22	0	0	0	0	0	0	0	0	0	0	0	0	0	0	0	0.01	1.47	6.69	0	0	0	0	0	0	0	0	0	0	0	0	0	0	0	0	0	0	0	0	0	0	0	0	0	0	0	0	0	0	0
Ike-200m-38	0	0	0	0	0	0	0	0	0	0	0	0	0	0	0	0	1.22	3.11	0	0	0	0	0	0	0	0	0	0	0	0	0	0	0	0	0	0	0	0	0	0	0	0	0	0	0	0	0	0	0
Ike-200m-53	0	0	0	0	0	0	0	0	0	0	0	0	0	0	0	0.82	1.63	3.38	0.18	0	0	0	0	0	0	0	0	0	0	0	0	0	0	0	0	0	0	0	0	0	0	0	0	0	0	0	0	0	0
Ike-200m-9	0	0	0	0	0	0	0	0	0	0	0	0	0	0	0	0.13	2.45	3.62	0	0	0	0	0	0	0	0	0	0	0	0	0	0	0	0	0	0	0	0	0	0	0	0	0	0	0	0	0	0	0
Ike-50m-33	0	0	0	0	0	0	0	0	0	0	0	0	0	0	0	1.36	0.23	0.06	8.13	0	0	0	0	0	0	0	0	0	0	0	0	0	0	0	0	0	0	0	0	0	0	0	0	0	0	0	0	0	0.01
Ike-50m-40	0	0	0	0	0	0	0	0	0	0	0	0	0	0	0	1.45	0.25	0.05	1.85	0	0	0	0	0	0	0	0	0	0	0	0	0	0	0	0	0	0	0	0	0	0	0	0	0	0	0	0	0	0
Ike-50m-54	0	0	0	0	0	0	0	0	0	0	0	0	0	0	0	0.83	0.32	0.02	2.4	0	0	0	0	0	0	0	0	0	0	0	0	0	0	0	0	0	0	0	0	0	0	0	0	0	0	0	0	0	0
Jr-19feb18-57	0	0	0	0	0	0	0	0	0	0	0	0	0	0	0	0	0	0	0	0	0.01	0	0	0	0.01	0	0	0.17	0	0	0	0	0	0.03	0	0	0	0	0	0	0	0	0	0	0	0	0	0	0
Jr-19feb18-67	0	0	0	0	0	0	0	0	0	0	0	0	0	0	0	0	0	0	0	0	0.04	0.02	0.18	0.01	0.06	0	0.02	0.16	0.04	0.02	0.01	0	0	0.06	0	0	0	0	0	0	0	0	0	0	0	0	0	0	0
LH-02apr19-200	0	0	0	0	0	0	0	0	0	0	0	0	0	0	0	0	0.02	0.02	0	0	0	0	0	0	0	0	0	0	0	0	0	0	0	0	0	0	0	0	0	0	0	0	0	0	0.24	0	0	0	0
LH-02apr19-23	0.03	0.02	0.03	0.05	0.01	0.02	0.03	0.03	0	0.01	0.02	0.01	0.02	0	0	0	0	0	0	0	0	0	0	0	0	0	0	0	0	0	0	0	0	0	0	0	0.02	0	0.01	0.01	0	0	0.03	0	0.2	0.07	0	0.01	0.23
LH-02apr19-231	0	0	0	0	0	0	0	0	0	0	0	0	0	0	0	0	0	0	0	0	0	0	0	0	0	0	0	0	0	0	0	0	0	0	0	0	0	0	0	0	0	0	0	0	0.21	0.08	0	0	0
LH-05nov19	0	0	0	0	0	0	0	0	0	0	0	0	0	0	0	0	0	0	0	0	0	0	0	0	0	0	0	0	0	0	0	0	0	0	0	0	0	0	0	0	0	0	0	0	0	0.19	0	0	0
MH-21oct19-172	0	0	0.01	0.01	0	0	0	0	0	0	0.01	0.02	0	0	0	0.02	0.01	0.01	0.01	0	0	0	0	0	0	0	0	0	0	0	0	0	0	0	0	0	0.02	0	0.01	0.01	0	0	0	0	0	0	0	0	0.06
MaH-04nov19-100	0	0	0	0	0	0	0	0	0	0	0	0	0	0	0	0	0	0	0	0	0	0	0	0	0	0	0	0	0	0	0	0	0	0	0	0	0	0	0	0	0	0	0	0	0	0	0	0	0.1
MaH-04nov19-107	0	0	0	0	0	0	0	0	0	0	0	0	0	0	0	0	0	0	0	0	0	0	0	0	0	0	0	0	0	0	0	0	0	0	0	0	0	0	0	0	0	0	0	0	0	0	0	0	0
MaH-04nov19-108	0	0	0	0	0.01	0.01	0	0	0	0	0	0	0	0	0	0.01	0	0	0	0	0	0	0	0	0	0	0	0	0	0	0	0	0	0	0	0	0	0	0	0	0	0	0	0	0	0	0	0.01	0.21
MaH-04nov19-110	0.01	0.01	0	0	0.01	0	0.08	0.11	0	0.01	0	0	0	0	0	0	0	0	0	0	0	0	0	0	0	0	0	0	0	0	0	0	0	0	0	0	0	0.01	0	0	0	0	0	0	0	0	0	0	0.07
MaH-04nov19-177	0	0	0	0	0	0	0	0	0	0	0	0	0	0	0	0	0	0	0	0	0	0	0	0	0	0	0	0	0	0	0	0	0	0	0	0	0	0	0	0	0	0	0	0	0	0	0	0.02	0.7
MaH-04nov19-192	0	0	0	0	0	0	0	0	0	0	0	0	0	0	0	0	0	0	0	0	0	0	0	0	0	0	0	0	0	0	0	0	0	0	0	0	0	0	0	0	0	0	0	0	0	0	0	0.01	0.64
MaH-04nov19-195	0	0	0	0	0	0	0	0	0	0	0	0	0	0	0	0.01	0.01	0	0	0	0	0	0	0	0	0	0	0	0	0	0	0	0	0	0	0	0	0	0	0	0	0	0	0	0	0	0	0.03	0.33
MaH-04nov19-197	0	0	0	0	0	0	0	0	0	0	0	0	0	0	0	0	0	0	0	0	0	0	0	0	0	0	0	0	0	0	0	0	0	0	0	0	0	0	0	0	0	0	0	0	0	0	0	0.02	1.11
MaH-04nov19-39	0	0	0	0	0	0	0	0	0	0	0	0	0	0	0	0.01	0.01	0.01	0	0	0	0	0	0	0	0	0	0	0	0	0	0	0	0	0	0	0	0	0	0	0	0	0	0	0	0	0	0	0.11
MaH-04nov19-42	0	0	0	0	0	0	0	0	0	0	0	0	0	0	0	0	0	0	0	0	0	0	0	0	0	0	0	0	0	0	0	0	0	0	0	0	0	0	0	0	0	0	0	0	0	0	0	0	0.08
MaH-04nov19-6	0	0	0	0	0	0	0	0	0	0	0	0	0	0	0	0	0	0	0	0	0	0	0	0	0	0	0	0	0	0	0	0	0	0	0	0	0	0	0	0	0	0	0	0	0	0	0	0	0.01
MaH-04nov19-71	0	0	0	0	0	0.01	0	0	0	0	0	0	0	0	0	0.01	0	0	0	0	0	0	0	0	0	0	0	0	0	0	0	0	0	0	0	0	0	0	0	0	0	0	0	0	0	0	0	0.01	0.1
MaH-04nov19-74	0	0	0	0	0	0	0	0	0	0	0	0	0	0	0	0	0	0	0	0	0	0	0	0	0	0	0	0	0	0	0	0	0	0	0	0	0	0	0	0	0	0	0	0	0	0	0	0	0.01
MaH-04nov19-81	0	0	0	0	0	0	0	0	0	0	0	0	0	0	0	0.01	0.01	0	0	0	0	0	0	0	0	0	0	0	0	0	0	0	0	0	0	0	0	0	0	0	0	0	0	0	0	0	0	0	0.12
MaH-04nov19-96	0	0	0	0	0	0	0	0	0	0	0	0	0	0	0	0.01	0.01	0.01	0	0	0	0	0.01	0	0	0	0	0.01	0	0	0	0	0	0	0	0	0	0	0	0	0	0	0	0	0	0.01	0	0.03	1.34
MaH-04nov19-97	0	0	0	0	0	0	0	0	0	0	0	0	0	0	0	0	0	0	0	0	0	0	0	0	0	0	0	0	0	0	0	0	0	0	0	0	0	0	0	0	0	0	0	0	0	0	0	0.01	0.31
MaH-09apr19-126	0	0	0	0	0.77	1.08	0	0	0	0	0	0	0	0	0	0	0	0	0	0	0	0	0	0	0	0	0	0	0	0	0	0	0	0	0	0	0	0	0	0	0	0	0	0	0	0	0	0.01	0.1
MaH-09apr19-161	0	0	0.01	0.03	0	0.01	0	0	0	0	0.18	0.27	0	0	0	0.01	0	0	0	0	0	0	0	0	0	0	0	0	0	0	0	0	0	0	0	0	0	0	0	0	0	0	0	0	0.02	0.03	0	0.1	0.18
MaH-09apr19-169	0	0	0	0	0	0	0	0	0	0	0	0	0	0	0	0	0	0	0	0	0	0	0	0	0	0	0	0	0	0	0	0	0	0	0	0	0	0	0	0	0	0	0	0	0	0	0	0.01	0.16
MaH-09apr19-21	0	0	0	0	0	0	0	0	0	0	0.07	0.05	0	0	0	0.01	0	0	0	0	0	0	0	0	0	0	0	0	0	0	0	0	0	0	0	0	0	0	0	0	0	0	0	0	0	0	0	0.07	0.06
MaH-09apr19-231	0.01	0	0.01	0.04	0.07	0.11	0	0	0	0	0.2	0.19	0	0	0	0	0	0	0	0	0	0	0	0	0	0	0	0	0	0	0	0	0	0	0	0	0	0	0	0	0	0	0	0	0	0	0	0.03	0.69
MaH-09apr19-248	0	0	0	0.01	0.01	0.01	0	0	0	0	0	0.01	0	0	0	0.01	0.01	0	0	0	0	0	0	0	0	0	0	0	0	0	0	0	0	0	0	0	0.01	0	0.01	0	0	0	0	0	0	0	0	0.02	0.18
MaH-09apr19-252	0	0	0	0	0	0	0	0	0	0	0	0	0	0	0	0	0	0	0	0	0	0	0	0	0	0	0	0	0	0	0	0	0	0	0	0	0	0	0	0	0	0	0	0	0	0	0	0.01	0.71
MaH-09apr19-65	0	0	0	0	0	0	0	0	0	0	0	0	0	0	0	0	0	0	0	0	0	0	0	0	0	0	0	0	0	0	0	0	0	0	0	0	0	0	0	0	0	0	0	0	0	0	0	0.01	0.12
MaH-09apr19-90	0	0	0	0	0	0	0	0	0	0	0	0	0	0	0	0.02	0.01	0	0.01	0	0	0	0	0	0	0	0	0	0	0	0	0	0	0	0	0	0	0	0	0	0	0	0	0	0	0	0	0.1	0.55
Mag-100m-18	0	0	0	0	0	0	0	0	0	0	0	0	0	0	0	0.01	0.01	0	0	0	0	0	0	0	0	0	0	0	0	0	0	0	0	0	0	0	0	0	0	0	0	0	0	0	0	0	0	0	3.08
Mag-300m-26	0	0	0	0	0	0	0	0	0	0	0	0	0	0	0	0	0	0	0	0	0	0	0	0	0	0	0	0	0	0	0	0	0	0	0	0	0.07	0	0.01	0.06	0	0.03	0	0	0	0	0	0	0
MiE-14oct19-109	0	0	0	0	0	0	0	0	0	0	0	0	0	0	0	0	0	0	0	0	0	0	0	0	0	0	0	0	0	0	0	0	0	0	0	0	0	0	0	0	0	0	0	0	0	0	0	0	0
MiE-16apr19-201	0	0	0	0	0	0	0.04	0.04	0	0	0	0	0	0	0	0	0	0	0	0	0	0	0	0	0	0	0	0	0	0	0	0	0	0	0	0	0	0	0	0	0	0	0	0	0	0	0	0	0
MiE-16apr19-257	0.02	0.01	0.01	0.02	0.01	0.01	0.05	0.06	0	0	0.01	0	0.02	0	0	0	0	0	0	0	0	0	0	0	0	0	0	0	0	0	0	0	0	0	0	0	0	0	0	0	0	0	0	0	0.02	0.01	0	0	0.12
MiH-14oct19-109	0	0	0	0	0	0	0	0	0	0	0	0	0	0	0	0	0	0	0	0	0	0	0	0	0	0	0	0	0	0	0	0	0	0	0	0	0	0	0	0	0	0	0	0	0	0	0	0	0
MiH-14oct19-129	0	0	0	0	0	0	0	0	0	0	0	0	0	0	0	0	0	0	0	0	0	0	0	0	0	0	0	0	0	0	0	0	0	0	0	0	0	0	0	0	0	0	0	0	0	0	0	0	0
MiH-14oct19-207	0	0	0	0	0	0	0	0	0	0	0	0	0	0	0	0	0	0	0	0	0	0	0	0	0	0	0	0	0	0	0	0	0	0	0	0	0	0	0	0	0	0	0	0	0	0	0	0	0
MoH-23oct19-148	0.02	0	0.03	0.05	0	0	0	0	0	0	0.31	0.38	0	0	0	0.02	0.01	0	0.01	0	0	0	0	0	0	0	0	0	0	0	0	0	0	0	0	0	0.12	0	0.09	0.06	0	0.04	0	0	0.01	0.01	0.07	0.05	0.31
MoH-23oct19-239	0.04	0	0.2	0.04	0	0	0	0	0	0	0.1	0.02	0	0	0	0	0	0	0	0	0	0	0	0	0	0	0	0	0	0	0	0	0	0	0	0	0	0	0.01	0	0	0.01	0	0	0	0.01	0	0	0.04
MsH-01oct19-133	0	0	0	0	0	0	0	0	0	0	0	0	0	0	0	0	0	0	0	0	0	0	0	0	0	0	0	0	0	0	0	0	0	0	0	0	0	0	0	0	0	0	0	0	0	0	0	0	0
MsH-01oct19-19	0	0	0	0	0	0	0	0	0	0	0	0	0	0	0	0	0	0	0	0	0	0	0	0	0	0	0	0	0	0	0	0	0	0	0	0	0.06	0	0.01	0.06	0	0.03	0	0	0	0	0	0	0
MsH-01oct19-81	0	0	0	0	0	0	0	0	0	0	0	0	0	0	0	0	0	0	0	0	0	0	0	0	0	0	0	0	0	0	0	0	0	0	0	0	0	0	0	0	0	0	0	0	0	0	0	0	0
MsH-01oct19-87	0.01	0	0.02	0.03	0	0	0	0	0	0	0.3	0.37	0	0	0	0	0	0	0	0	0	0	0	0	0	0	0	0	0	0	0	0	0	0	0	0	0.11	0	0.09	0.05	0	0.04	0	0	0	0	0.07	0.05	0.26
MsH-30apr19-258	0	0	0	0	0	0	0	0	0	0	0	0	0	0	0	0	0	0	0	0	0	0	0	0	0	0	0	0	0	0	0	0	0	0	0	0	0	0	0	0	0	0	0.04	0	0	0	0	0.04	0
MsH-30apr19-336	0	0	0.01	0.01	0	0	0	0	0	0	0.01	0.02	0	0	0	0.03	0.01	0.01	0.01	0	0	0	0	0	0	0	0	0	0	0	0	0	0	0	0	0	0.02	0	0.01	0.01	0	0	0	0	0	0	0	0	0.06
MsH-30jul19-11	0.03	0.01	0.02	0.03	0	0	0	0	0	0	0	0	0.01	0	0	0	0	0	0	0	0	0	0	0	0	0	0	0	0	0	0	0	0	0	0	0	0	0	0	0	0	0	0	0	0.01	0	0	0	0.11
RE-15aug16-192	0	0	0	0	0	0	0	0	0	0	0	0	0	0	0	0	0	0	0	0	0	0	0	0	0	0	0	0	0	0	0	0	0	0	0	0	0	0	0	0	0	0	0	0	0	0	0	0	0
RE-4nov15-20	0	0	0	0	0	0	0	0	0	0	0	0	0	0	0	0	0	0	0	0	0	0	0	0	0	0	0	0	0	0	0	0	0	0	0	0	0	0	0	0	0	0	0	0	0	0	0	0	0
RE-4nov15-362	0	0	0	0	0	0	0	0	0	0	0	0	0	0	0	0	0	0	0	0	0	0	0	0	0	0	0	0	0	0	0	0	0	0	0	0	0	0	0	0	0	0	0	0	0	0	0	0	0
RH-15aug16-383	0	0	0	0	0	0	0	0	0	0	0	0	0	0	0	0	0	0	0	0	0	0	0	0	0	0	0	0	0	0	0	0	0	0	0	0	0.05	0	0.01	0.05	0	0.03	0	0	0	0	0	0	0
RH-20apr16-307	0	0	0	0	0	0	0	0	0	0	0	0	0	0	0	0	0	0	0	0	0	0	0	0	0	0	0	0	0	0	0	0	0	0	0	0	0.06	0	0.01	0.05	0	0.03	0	0	0	0	0	0	0
RH-20apr16-362	0.01	0.01	0.01	0.01	0	0.01	0.01	0.01	0	0	0.01	0	0.01	0	0	0	0	0	0	0	0	0	0	0	0	0	0	0	0	0	0	0	0	0	0	0	0.01	0	0	0	0	0	0.01	0	0.04	0.02	0	0	0.06
RH-23may17-1	0	0	0	0	0	0	0	0	0	0	0	0	0	0	0	0	0	0	0	0	0	0	0	0	0	0	0	0	0	0	0	0	0	0	0	0	0	0	0	0	0	0	0	0	0	0	0	0	0
RH-23may17-1099	0	0	0	0	0	0	0	0	0	0	0	0	0	0	0	0	0	0	0	0	0	0	0	0	0	0	0	0	0	0	0	0	0	0	0	0	0	0	0	0	0	0	0	0	0	0	0	0	0
RH-23may17-197	0	0	0	0	0	0	0	0	0	0	0	0	0	0	0	0	0	0	0	0	0	0	0	0	0	0	0	0	0	0	0	0	0	0	0	0	0.06	0	0.01	0.05	0	0.03	0	0	0	0	0	0	0
RH-23may17-429	0	0	0	0	0	0	0	0	0	0	0	0	0	0	0	0	0	0	0	0	0	0	0	0	0	0	0	0	0	0	0	0	0	0	0	0	0	0	0	0	0	0	0	0	0	0	0	0	0.07
RH-23may17-877	0	0	0	0	0	0	0	0	0	0	0	0	0	0	0	0	0	0	0	0	0	0	0	0	0	0	0	0	0	0	0	0	0	0	0	0	0	0	0	0	0	0	0	0	0	0	0	0	0
RH-23may17-878	0	0	0	0	0	0	0	0	0	0	0	0	0	0	0	0	0	0	0	0	0	0	0	0	0	0	0	0	0	0	0	0	0	0	0	0	0	0	0	0	0	0	0	0	0	0	0	0	0
RH-26jul17-192	0	0	0	0	0	0	0	0	0	0	0	0	0	0	0	0	0	0	0	0	0	0	0	0	0	0	0	0	0	0	0	0	0	0	0	0	0.06	0	0.01	0.05	0	0.03	0	0	0	0	0	0	0
RH-26jul17-99	0	0	0	0.01	0.01	0.02	0	0	0	0	0.1	0.07	0	0	0	0	0	0	0	0	0	0	0	0	0	0	0	0	0	0	0	0	0	0	0	0	0	0	0	0	0	0	0	0	0	0	0	0.01	0.11
RH-27jun17-331	0.02	0.01	0.01	0.02	0	0	0	0	0	0	0	0	0.01	0	0	0	0	0	0	0	0	0	0	0	0	0	0	0	0	0	0	0	0	0	0	0	0	0	0	0	0	0	0	0	0	0	0	0	0.07
TE-08apr19-119	0.05	0	0.16	0.23	0.02	0.03	0.01	0.01	0	0	0.08	0.12	0	0	0	0.01	0.01	0	0.01	0	0	0	0	0	0	0	0	0	0	0	0	0	0	0	0	0	0.02	0	0.01	0.02	0	0.01	0.01	0	0.04	0.01	0.01	0.02	0.06
TH-08apr19-126	0.01	0	0.01	0.04	0.07	0.11	0	0	0	0	0.22	0.21	0	0	0	0	0	0	0	0	0	0	0	0	0	0	0	0	0	0	0	0	0	0	0	0	0	0	0	0	0	0	0	0	0	0	0	0.03	0.68
TH-08apr19-232	0	0	0.01	0.03	0	0	0	0	0	0	0.19	0.27	0	0	0	0	0	0	0	0	0	0	0	0	0	0	0	0	0	0	0	0	0	0	0	0	0	0	0	0	0	0	0	0	0.02	0.02	0	0.08	0.15
TH-08apr19-279	0	0	0	0	0	0	0	0	0	0	0.01	0.02	0	0	0	0	0	0	0	0	0	0	0	0	0	0	0	0	0	0	0	0	0	0	0	0	0	0	0	0	0	0	0	0	0.01	0	0	0	0.02
TH-11nov19-123	0	0	0	0	0.1	0.16	0	0	0	0	0	0	0	0	0	0	0	0	0	0	0	0	0	0	0	0	0	0	0	0	0	0	0	0	0	0	0	0	0	0	0	0	0	0	0	0	0	0	0.12
TH-11nov19-141	0	0	0	0	0	0	0	0	0	0	0	0	0	0	0	0	0	0	0	0	0	0	0	0	0	0	0	0	0	0	0	0	0	0	0	0	0	0	0	0	0	0	0	0	0	0	0	0	0.07
TH-11nov19-157	0	0	0	0	0	0	0	0	0	0	0.72	0.18	0	0	0	0	0	0	0	0	0	0	0	0	0	0	0	0	0	0	0	0	0	0	0	0	0	0	0	0	0	0	0	0	0	0	0	0	0
TH-11nov19-158	0	0	0	0	0	0	0	0	0	0	0	0	0	0	0	0.02	0.01	0.01	0	0	0	0	0	0	0	0	0	0	0	0	0	0	0	0	0	0	0	0	0	0	0	0	0	0	0	0	0	0.07	0.41
TH-11nov19-189	0.07	0	0.06	0.07	0.05	0.06	0	0	0	0	0.17	0.29	0	0	0	0.01	0.01	0	0	0	0	0	0	0	0	0	0	0	0	0	0	0	0	0	0	0	0	0	0	0	0	0	0	0	0	0	0	0.01	0.82
TH-11nov19-2	0.4	0	0.3	0.42	0	0	0	0	0	0	0.12	0.1	0	0	0	0	0	0	0	0	0	0	0	0	0	0	0	0	0	0	0	0	0	0	0	0	0	0	0	0	0	0	0.01	0	0.03	0.03	0	0.06	0.61
TH-11nov19-213	0	0	0	0	0	0	0	0	0	0	0	0	0	0	0	0	0	0	0	0	0	0	0	0	0	0	0	0	0	0	0	0	0	0	0	0	0	0	0	0	0	0	0	0	0	0	0	0	0.03
TH-11nov19-238	0	0	0	0	0	0	0	0	0	0	0.09	0.04	0	0	0	0	0	0	0	0	0	0	0	0	0	0	0	0	0	0	0	0	0	0	0	0	0	0	0	0	0	0	0	0	0	0	0	0.04	0.04
TH-11nov19-85	0	0	0	0	0	0	0	0	0	0	0	0	0	0	0	0.01	0	0	0	0	0	0	0	0	0	0	0	0	0	0	0	0	0	0	0	0	0	0	0	0	0	0	0	0	0	0	0	0	0
TH-11nov19-92	0	0	0	0	0	0	0	0	0	0	0	0	0	0	0	0	0	0	0	0	0	0	0	0	0	0	0	0	0	0	0	0	0	0	0	0	0	0	0	0	0	0	0	0	0	0	0	0	0
TH-Jun18-111	0	0	0	0	0	0	0	0	0	0	0	0	0	0	0	0.01	0	0	0	0	0	0	0	0	0	0	0	0	0	0	0	0	0	0	0	0	0	0	0	0	0	0	0	0	0	0	0	0	0
TH-Jun18-118	0	0	0	0	0	0	0	0	0	0	0	0	0	0	0	0.01	0.01	0	0	0	0	0	0	0	0	0	0	0	0	0	0	0	0	0	0	0	0	0	0	0	0	0	0	0	0	0	0	0.02	0.93
TH-Jun18-152	0	0	0	0	0	0	0	0	0	0	0	0	0	0	0	0	0	0	0	0	0	0	0	0	0	0	0	0	0	0	0	0	0	0	0	0	0	0	0	0	0	0	0	0	0	0	0	0	0
TH-Jun18-30	0	0	0	0	0	0	0	0	0	0	0	0	0.01	0	0	0	0	0	0	0	0	0	0	0	0	0	0	0	0	0	0	0	0	0	0	0	0	0	0	0	0	0	0.01	0	0.01	0	0	0	0
TH-Jun18-57	0	0	0.05	0.23	0	0	0.02	0.03	0	0	0	0	0	0	0	0.02	0.01	0	0.01	0	0	0	0	0	0	0	0	0	0	0	0	0	0	0	0	0	0	0	0	0	0	0	0	0	0	0	0	0	0
TrE-03may19-249	0	0	0.01	0.03	0	0	0	0	0	0	0.19	0.28	0	0	0	0	0	0	0	0	0	0	0	0	0	0	0	0	0	0	0	0	0	0	0	0	0	0	0	0	0	0	0	0	0.02	0.03	0	0.08	0.15
TrH-03may19-290	0	0	0	0	0	0	0	0	0	0	0	0	0	0	0	0.01	0	0	0	0	0	0	0	0	0	0	0	0	0	0	0	0	0	0	0	0	0	0	0	0	0	0	0	0	0	0	0	0	0.01
TrH-25oct19-144	0.06	0	0.14	0.84	0	0	0	0	0	0	0.07	0.19	0	0	0	0.01	0.01	0.01	0	0	0	0	0	0	0	0	0	0	0	0	0	0	0	0	0	0	0	0	0	0	0	0	0	0	0	0.04	0	0	0
TrH-25oct19-200	0	0	0	0	0	0	0	0	0	0	0	0	0	0	0	0.01	0.01	0	0	0	0	0	0	0	0	0	0	0	0	0	0	0	0	0	0	0	0	0	0	0	0	0	0	0	0	0	0	0	0
TrH-25oct19-208	0	0	0	0	0	0	0	0	0	0	0	0	0	0	0	0	0	0	0.02	0	0	0	0	0	0	0	0	0	0	0	0	0	0	0	0	0	0	0	0	0	0	0	0	0	0	0	0	0	0
TrH-25oct19-271	0.07	0	0.06	0.07	0.05	0.07	0	0	0	0	0.17	0.28	0	0	0	0.03	0.01	0.01	0.01	0	0	0	0	0	0	0	0	0	0	0	0	0	0	0	0	0	0	0	0	0	0	0	0	0	0	0	0	0.01	0.79
TrH-25oct19-38	0	0	0	0	0	0	0	0	0	0	0	0	0	0	0	0	0	0	0	0	0	0	0	0	0	0	0	0	0	0	0	0	0	0	0	0	0	0	0	0	0	0	0	0	0	0	0	0.01	0.03
TrH-25oct19-77	0	0	0	0	0	0	0	0	0	0	0	0	0	0	0	0.04	0.01	0	0.01	0	0	0	0.01	0	0	0	0	0.01	0	0	0	0	0	0	0	0	0	0	0	0	0	0	0	0	0	0	0	0.01	0.48
TrH-25oct19-80	0.41	0	0.3	0.43	0	0	0	0	0	0	0.09	0.08	0	0	0	0	0	0	0	0	0	0	0	0	0	0	0	0	0	0	0	0	0	0	0	0	0	0	0	0	0	0	0.01	0	0.02	0.02	0	0.05	0.46
ZE-17mar17-112	0.09	0.03	0.07	0.01	0	0	0	0	0	0	0	0	0	0	0	0	0	0	0	0	0	0	0	0	0	0	0	0	0	0	0	0	0	0	0	0	0	0	0	0	0	0	0	0	0	0	0	0	0
ZE-3nov15-161	0	0	0	0	0	0	0	0	0	0	0	0	0	0	0	0	0	0	0	0	0	0	0	0	0	0	0	0	0	0	0	0	0	0	0	0	0	0	0	0	0	0	0	0.02	0	0	0	0	0
ZE-Oct18-214	0	0	0	0	0	0	0	0	0	0.01	0	0.01	0	0	0	0	0	0	0	0	0	0	0	0	0	0	0	0	0	0	0	0	0	0	0	0	0	0	0	0	0	0	0	0	0	0	0	0	0
ZH-03nov15-118	0	0	0	0.01	0	0	0	0	0	0	0	0	0	0	0	0	0	0	0	0	0	0	0	0	0	0	0	0	0	0	0	0	0	0	0	0	0.01	0	0.01	0	0	0	0	0	0.01	0	0	0	0.01
ZH-03nov15-64	0.01	0	0.01	0.01	0	0	0	0	0	0	0	0	0	0	0	0	0	0	0	0	0	0	0	0	0	0	0	0	0	0	0	0	0	0	0	0	0	0	0	0	0	0	0.01	0	0.04	0.01	0	0	0.01
ZH-13nov19-192	0.01	0	0.01	0.03	0	0	0	0	0	0	0.41	0.51	0	0	0	0	0	0	0	0	0	0	0	0	0	0	0	0	0	0	0	0	0	0	0	0	0.08	0	0.07	0.04	0	0.03	0	0	0	0	0.07	0.05	0.27
ZH-13nov19-250	0.06	0	0.17	0.24	0.02	0.03	0.01	0.01	0.01	0.01	0.09	0.13	0	0	0	0	0	0	0	0	0	0	0	0	0	0	0	0	0	0	0	0	0	0	0	0	0.02	0	0.01	0.01	0	0.01	0.01	0	0.04	0.01	0.01	0.02	0.05
ZH-3nov15-115	0.04	0	0.21	0.04	0	0	0	0	0	0	0.11	0.02	0	0	0	0	0	0	0	0	0	0	0	0	0	0	0	0	0	0	0	0	0	0	0	0	0	0	0.01	0	0	0.01	0	0	0	0.01	0	0	0.05
ZH-Jul18-129	0	0	0	0	0	0	0	0	0	0	0	0	0	0	0	0	0	0	0	0	0	0	0	0	0	0	0	0	0	0	0	0	0	0	0	0	0	0	0	0	0	0	0	0	0	0	0	0	0
ZH-Jul18-135	0	0	0	0	0	0	0	0	0	0	0	0	0	0	0	0	0	0	0	0	0	0	0	0	0	0	0	0	0	0	0	0	0	0	0	0	0	0	0	0	0	0	0	0	0	0	0	0	0
ZH-Jul18-243	0	0	0	0	0	0	0	0	0	0	0	0	0	0.01	0.04	0	0	0	0	0	0	0	0	0	0	0	0	0	0	0	0	0	0	0	0	0	0	0	0	0	0	0	0	0	0	0	0	0	0.21
ZH-Oct18-90	0	0	0	0	0	0	0	0	0	0	0	0	0	0	0	0	0	0	0	0	0	0	0	0	0	0	0	0	0	0	0	0	0	0	0	0	0	0	0	0	0	0	0	0	0	0	0	0	0
ZH-bin-156	0	0	0.04	0.21	0	0	0	0	0	0	0	0	0	0	0	0.01	0	0	0	0	0	0	0	0	0	0	0	0	0	0	0	0	0	0	0	0	0	0	0	0	0	0	0	0	0	0	0	0	0.01
	0.5	0.03	0.37	0.84	0.96	1.23	0.12	0.11	0.07	0.02	0.76	0.51	0.02	0.01	1.26	6.8	4.92	6.69	8.13	0.38	0.04	0.02	0.18	0.03	0.06	0	0.02	0.17	0.04	0.14	0.01	0	0	0.06	0.02	1.34	4.94	0.01	2.77	2.47	1.64	1.54	0.04	0.02	0.24	0.19	0.07	0.1	3.08
[truncated: 70 more columns]

## Sheet: Table_S7
Back to index
Supplementary Table 7. Basic statistics for Refseq 81 database, representative CPR genomes from GTDB r89 and the MAGs assembled in this study.
RefSeq assembly accession	FILENAME	Lifestyle	Genome_completeness	GC	Genome_size_COG	Genome_size_COG_r	Coding density	TOTAL_CDS	Total_CDS_estimation	MEDIAN_CDS	MEDIAN_INTERGENIC_SPACER
GCF_000005825.2	REF81MG1	Free-living	100	40.267	3858997	3858997	86.72	3856	3856	252	90
GCF_000007305.1	REF81MG10	Free-living	100	40.77	1908256	1908256	91.85	2096	2096	244	17
GCF_000012505.1	REF81MG100	Free-living	100	54.164	2234828	2234828	90.83	2443	2443	231	41
GCF_000210615.1	REF81MG1000	Free-living	100	31.43	1966750	1966750	70	1926	1926	186	45
GCF_000210915.2	REF81MG1001	Free-living	100	36.747	3435933	3435933	93.68	3277	3277	278	27
GCF_000211835.1	REF81MG1002	Free-living	100	65.087	3613850	3613850	91.24	3270	3270	293	60
GCF_000211855.2	REF81MG1003	Free-living	100	30.823	3296168	3296168	92.2	2977	2977	274	58
GCF_000212375.1	REF81MG1004	Free-living	100	52.468	2186370	2186370	88.04	1727	1727	321	51
GCF_000212395.1	REF81MG1005	Free-living	100	33.866	1898865	1898865	93.21	1852	1852	279	22
GCF_000212415.1	REF81MG1006	Free-living	100	51.473	3055580	3055580	91.39	2579	2579	312	51
GCF_000212675.2	REF81MG1007	Free-living	100	61.421	4200534	4200534	85.46	3783	3783	266	90
GCF_000212695.1	REF81MG1008	Free-living	100	74.724	4266344	4266344	90.58	3811	3811	293	69
GCF_000212735.1	REF81MG1009	Free-living	100	47.133	8371686	8371686	89.44	6595	6595	300	99
GCF_000012545.1	REF81MG101	Free-living	100	27.634	1767403	1767403	85.55	1552	1552	259.5	84
GCF_000212915.1	REF81MG1010	Free-living	100	34.99	2991798	2991798	86.99	2501	2501	290	74
GCF_000213055.1	REF81MG1011	Free-living	100	73.12	7359380	7359380	85.21	6289	6289	285	118
GCF_000213215.1	REF81MG1012	Free-living	100	34.148	2137654	2137654	89.39	2475	2475	210	33
GCF_000213255.1	REF81MG1013	Free-living	100	43.452	3135972	3135972	91.39	2960	2960	288	29
GCF_000213295.2	REF81MG1014	Free-living	100	38.764	2536778	2536778	86.78	2152	2152	262	51
GCF_000213555.1	REF81MG1015	Free-living	100	39.53	5176087	5176087	88.23	4119	4119	309	71
GCF_000213575.1	REF81MG1016	Free-living	100	37.439	3954365	3954365	90.25	3400	3400	290	63
GCF_000213805.1	REF81MG1017	Free-living	100	63.512	4920769	4920769	88.9	4455	4455	283	74.5
GCF_000213825.1	REF81MG1018	Free-living	100	35.548	2143887	2143887	88.35	2353	2353	228	49
GCF_000213935.1	REF81MG1019	Free-living	100	69.493	3106595	3106595	91.22	2779	2779	299	48
GCF_000012565.1	REF81MG102	Obligate intracelullar parasite	100	28.958	1315030	1315030	73	970	970	260.5	232
GCF_000213975.1	REF81MG1020	Free-living	100	55.06	2761262	2761262	88.75	2495	2495	277	42
GCF_000214035.1	REF81MG1021	Free-living	100	66.968	4229433	4229433	91.46	3833	3833	277	41
GCF_000214095.2	REF81MG1022	Free-living	100	56.594	3207552	3207552	90.34	3243	3243	241	31
GCF_000214155.1	REF81MG1023	Free-living	100	68.372	4643668	4643668	92.39	4342	4342	283	34
GCF_000214175.1	REF81MG1024	Free-living	100	62.244	4738809	4738809	92.27	4417	4417	285	43
GCF_000214215.1	REF81MG1025	Free-living	100	44.285	3899940	3899940	89.76	3517	3517	291	70
GCF_000214335.1	REF81MG1026	Free-living	100	63.72	4074265	4074265	91.85	3873	3873	271	49
GCF_000214355.1	REF81MG1027	Free-living	100	49.797	3855671	3855671	93.81	3402	3402	307	22
GCF_000214375.1	REF81MG1028	Free-living	100	50.838	4059867	4059867	92.13	3499	3499	302	37
GCF_000214415.1	REF81MG1029	Free-living	100	32.3	1854197	1854197	83.64	1821	1821	252	93
GCF_000012585.1	REF81MG103	Free-living	100	44.278	2572079	2572079	89.32	2094	2094	274	84
GCF_000214435.1	REF81MG1030	Free-living	100	46.626	2892255	2892255	86.89	2790	2790	257	75.5
GCF_000214595.1	REF81MG1031	Free-living	100	43.373	3261960	3261960	92.47	3119	3119	268	31
GCF_000214665.1	REF81MG1032	Free-living	100	51.31	5051681	5051681	89.03	4599	4599	262	52
GCF_000214725.1	REF81MG1033	Free-living	100	35.732	2546541	2546541	79.64	2442	2442	231	161
GCF_000214785.1	REF81MG1034	Free-living	100	37.696	2113023	2113023	89.12	2161	2161	244	59
GCF_000214825.1	REF81MG1035	Free-living	100	46.98	1932455	1932455	94.45	1678	1678	277	25
GCF_000215085.1	REF81MG1036	Free-living	100	47.243	3969014	3969014	85.67	3916	3916	248	78
GCF_000215105.1	REF81MG1037	Free-living	100	73.888	3307740	3307740	91.37	3000	3000	290	54
GCF_000215705.1	REF81MG1038	Free-living	100	69.997	4070193	4070193	92.59	3910	3910	285	28
GCF_000215935.2	REF81MG1039	Free-living	100	32.292	3404505	3404505	82.7	2979	2979	266	137
GCF_000012605.1	REF81MG104	Free-living	100	43.13	2427734	2427734	91.09	2263	2263	276	58
GCF_000215955.2	REF81MG1040	Free-living	100	61.618	3760335	3760335	90.15	3496	3496	282	61
GCF_000215975.1	REF81MG1041	Free-living	100	30.587	1634377	1634377	94.59	1635	1635	269	11.5
GCF_000215995.1	REF81MG1042	Free-living	100	51.638	1716818	1716818	92.13	1871	1871	244	20
GCF_000217635.1	REF81MG1043	Obligate intracellular symbiont	100	23.032	444925	444925	82.3	394	394	246.5	105
GCF_000217675.1	REF81MG1044	Free-living	100	44.512	4052047	4052047	87.8	3669	3669	276	82
GCF_000217715.1	REF81MG1045	Free-living	100	65.982	3668009	3668009	86.32	3595	3595	255	106
GCF_000217795.1	REF81MG1046	Free-living	100	42.425	2322224	2322224	91.45	2242	2242	278.5	14
GCF_000217815.1	REF81MG1047	Free-living	100	40.324	2039943	2039943	94.1	2038	2038	283.5	13
GCF_000217995.1	REF81MG1048	Free-living	100	39.156	2138444	2138444	87.94	2026	2026	260	67.5
GCF_000218235.1	REF81MG1049	Free-living	100	48.29	3388644	3388644	89.48	2926	2926	290	54
GCF_000012645.1	REF81MG105	Free-living	100	31.21	1709204	1709204	90.38	1919	1919	224	40
GCF_000218545.1	REF81MG1050	Free-living	100	73.813	3526441	3526441	91.88	3202	3202	287	54
GCF_000218565.1	REF81MG1051	Free-living	100	62.475	3595748	3595748	87.96	3399	3399	265	86
GCF_000218625.1	REF81MG1052	Free-living	100	38.294	2526590	2526590	88.94	2373	2373	279	22.5
GCF_000218765.1	REF81MG1053	Free-living	100	47.576	2889059	2889059	90.31	2918	2918	257	68
GCF_000218785.1	REF81MG1054	Free-living	100	45.503	2591567	2591567	91.57	2294	2294	288	60
GCF_000218875.1	REF81MG1055	Free-living	100	44.094	1989865	1989865	86.91	1691	1691	287	96.5
GCF_000218895.1	REF81MG1056	Free-living	100	46.59	6568739	6568739	88.75	5660	5660	285	85
GCF_000219045.1	REF81MG1057	Free-living	100	32.866	2035931	2035931	92.87	1957	1957	283	30
GCF_000219105.1	REF81MG1058	Free-living	100	70.625	9003593	9003593	90.23	7284	7284	301	66
GCF_000219125.1	REF81MG1059	Free-living	100	50.36	4305901	4305901	88.68	4042	4042	263.5	73
GCF_000012665.1	REF81MG106	Free-living	100	57.836	3730232	3730232	88.52	3341	3341	279	72
GCF_000219175.1	REF81MG1060	Obligate intracellular symbiont	100	43.519	538294	538294	80.65	438	438	267.5	141
GCF_000219355.1	REF81MG1061	Obligate intracelullar parasite	100	36.554	1183732	1183732	79.24	1368	1368	157	67
GCF_000219535.2	REF81MG1062	Free-living	100	41.11	5114147	5114147	85.15	4512	4512	258	104
GCF_000219585.1	REF81MG1063	Free-living	100	45.443	3783444	3783444	86.62	3557	3557	251	81
GCF_000219605.1	REF81MG1064	Free-living	100	63.928	4547930	4547930	89.94	4191	4191	279	68
GCF_000219725.1	REF81MG1065	Free-living	100	45.576	3239340	3239340	93.14	2869	2869	306	31
GCF_000219805.1	REF81MG1066	Free-living	100	35.483	1422478	1422478	87.11	1320	1320	267	79.5
GCF_000220155.1	REF81MG1067	Free-living	100	39.093	3860989	3860989	85.5	2995	2995	300	116
GCF_000220175.1	REF81MG1068	Free-living	100	32.673	1607695	1607695	90.54	1923	1923	205	48
GCF_000220235.1	REF81MG1069	Free-living	100	41.695	2669193	2669193	84.39	2213	2213	277	80
GCF_000012685.1	REF81MG107	Free-living	100	68.891	9139763	9139763	89.82	7314	7314	299	68
GCF_000220255.1	REF81MG1070	Free-living	100	36.501	3127600	3127600	81.52	2550	2550	262	87
GCF_000220335.1	REF81MG1071	Free-living	100	41.01	3727356	3727356	83.72	3652	3652	250	74
GCF_000220505.1	REF81MG1072	Free-living	100	56.814	3862761	3862761	88.8	3215	3215	294	90
GCF_000220525.1	REF81MG1073	Free-living	100	33.934	3384629	3384629	92.48	2841	2841	306	58
GCF_000220545.1	REF81MG1074	Free-living	100	55.892	4370691	4370691	91.86	4058	4058	282.5	46
GCF_000220565.1	REF81MG1075	Free-living	100	67.31	4649474	4649474	89.29	4405	4405	268	68
GCF_000220585.1	REF81MG1076	Free-living	100	37.058	3703532	3703532	92.95	3218	3218	289.5	41
GCF_000220625.1	REF81MG1077	Free-living	100	36.109	2571406	2571406	88.26	2245	2245	265	75
GCF_000220645.1	REF81MG1078	Free-living	100	32.941	1746697	1746697	89.97	1869	1869	240	47
GCF_000220835.1	REF81MG1079	Free-living	100	69.024	2828172	2828172	87.14	2383	2383	296	85
GCF_000012725.1	REF81MG108	Free-living	100	62.049	3402093	3402093	84.71	3255	3255	241	105
GCF_000220985.1	REF81MG1080	Free-living	100	71.492	2812133	2812133	89.62	2462	2462	298	85
GCF_000221145.1	REF81MG1081	Free-living	100	60.203	2430672	2430672	91.09	2261	2261	275	54
GCF_000221305.1	REF81MG1082	Membrane asociated or intracellular parasite	100	26.64	928687	928687	70.6	1526	1526	99	109
GCF_000221545.1	REF81MG1083	Free-living	100	38.883	1650551	1650551	90.47	1486	1486	268.5	38
GCF_000221565.1	REF81MG1084	Free-living	100	41.389	1950550	1950550	89.5	2153	2153	215	36
GCF_000221605.1	REF81MG1085	Free-living	100	39.447	1728638	1728638	88.34	1553	1553	268	43
GCF_000222105.3	REF81MG1086	Free-living	100	68.087	5577771	5577771	91.65	5203	5203	285	42
GCF_000222125.1	REF81MG1087	Free-living	100	56.524	4796529	4796529	89.12	4558	4558	271	72
GCF_000222305.1	REF81MG1088	Free-living	100	28.703	900755	900755	94.67	808	808	298.5	20
GCF_000222485.1	REF81MG1089	Free-living	100	38.146	6221273	6221273	87.29	5109	5109	300	77
GCF_000012745.1	REF81MG109	Free-living	100	66.067	2909809	2909809	91.87	2813	2813	260	33
GCF_000222855.1	REF81MG1090	Free-living	100	27.157	2952624	2952624	68.34	2532	2532	207	140
GCF_000223395.1	REF81MG1091	Free-living	100	54.904	1843267	1843267	88.48	1994	1994	233	56
GCF_000223905.1	REF81MG1092	Free-living	100	62.754	3484189	3484189	87.77	3530	3530	249	74
GCF_000223985.1	REF81MG1093	Free-living	100	64.107	5595540	5595540	85.94	4900	4900	260	106
GCF_000224005.2	REF81MG1094	Free-living	100	67.864	3779112	3779112	88.98	3252	3252	291	60
GCF_000224065.1	REF81MG1095	Free-living	100	62.274	5524189	5524189	88.98	4624	4624	284	81
GCF_000224085.1	REF81MG1096	Free-living	100	41.358	3842422	3842422	90.91	3473	3473	274	58
GCF_000224105.1	REF81MG1097	Membrane asociated or intracellular parasite	100	26.939	832603	832603	64.19	1381	1381	95	124
GCF_000224335.1	REF81MG1098	Free-living	100	33.769	3279329	3279329	89.3	3006	3006	264	72
GCF_000224415.1	REF81MG1099	Free-living	100	70.918	3466927	3466927	90.3	3049	3049	302	64
GCF_000007345.1	REF81MG11	Free-living	100	42.681	5751492	5751492	75.55	4880	4880	241	186
GCF_000012765.1	REF81MG110	Membrane asociated or intracellular parasite	100	23.77	1010023	1010023	63.02	1618	1618	94	134
GCF_000224475.1	REF81MG1100	Free-living	100	63.898	2913689	2913689	86.42	2989	2989	242	73
GCF_000224515.1	REF81MG1101	Free-living	100	42.055	5691349	5691349	83.76	5534	5534	231	104
GCF_000224715.1	REF81MG1102	Free-living	100	71.97	3433900	3433900	92.59	3183	3183	285	46
GCF_000224785.1	REF81MG1103	Free-living	100	42.499	3775822	3775822	84.57	3732	3732	253	102.5
GCF_000224985.1	REF81MG1104	Free-living	100	43.469	2066652	2066652	85.02	1978	1978	255	71
GCF_000225005.1	REF81MG1105	Free-living	100	63.735	2935506	2935506	92.5	2720	2720	272	42
GCF_000225325.1	REF81MG1106	Free-living	100	34.702	1298316	1298316	90.17	1321	1321	246	55
GCF_000225345.1	REF81MG1107	Free-living	100	48.497	3592125	3592125	88.92	3251	3251	287	59
GCF_000225445.1	REF81MG1108	Obligate intracellular symbiont	100	25.658	641794	641794	88.5	581	581	274	70
GCF_000225465.1	REF81MG1109	Obligate intracellular symbiont	100	24.136	615380	615380	87.57	541	541	276	73
GCF_000012805.1	REF81MG111	Free-living	100	50.318	3481691	3481691	87.47	3269	3269	254	63
GCF_000225525.1	REF81MG1110	Free-living	100	72.458	8211125	8211125	87.27	7372	7372	264	98
GCF_000225705.1	REF81MG1111	Free-living	100	59.996	2492085	2492085	85.89	2178	2178	281	94
GCF_000225825.1	REF81MG1112	Free-living	100	72.774	3191479	3191479	90.01	2850	2850	294	66
GCF_000225995.1	REF81MG1113	Free-living	100	66.601	6315749	6315749	88.76	5721	5721	248	86
GCF_000226215.1	REF81MG1114	Free-living	100	67.338	3352817	3352817	91.84	3154	3154	284	48
GCF_000226295.1	REF81MG1115	Free-living	100	61.338	3695372	3695372	90.99	3037	3037	317	61
GCF_000226315.1	REF81MG1116	Free-living	100	54.713	2481983	2481983	90.76	2338	2338	266	64
GCF_000226565.1	REF81MG1117	Free-living	100	42.299	4134229	4134229	89.15	3495	3495	293	81
GCF_000226625.1	REF81MG1118	Free-living	100	38.313	1638559	1638559	94.23	1523	1523	282	15
GCF_000226875.1	REF81MG1119	Free-living	100	56.377	2354550	2354550	82.16	2159	2159	248	111
GCF_000012825.1	REF81MG112	Free-living	100	42.201	5163189	5163189	89.82	4195	4195	308	64
GCF_000226955.1	REF81MG1120	Free-living	100	67.357	4124388	4124388	91.27	3815	3815	268	51
GCF_000227215.1	REF81MG1121	Free-living	100	53.163	3019868	3019868	92.06	3069	3069	241	25
GCF_000227315.1	REF81MG1122	Free-living	100	29.76	2237864	2237864	82.87	2133	2133	238	30
GCF_000227355.1	REF81MG1123	Membrane asociated or intracellular parasite	100	24.474	1195147	1195147	71.25	2029	2029	101	108
GCF_000227505.1	REF81MG1124	Free-living	100	52.902	2736988	2736988	92.11	2476	2476	296	49
GCF_000227525.1	REF81MG1125	Free-living	100	49.865	2165054	2165054	94.59	2231	2231	267	10
GCF_000227585.1	REF81MG1126	Free-living	100	54.835	1726255	1726255	89.7	1933	1933	196	36
GCF_000227665.2	REF81MG1127	Free-living	100	45.912	2158359	2158359	93.69	2049	2049	275	24
GCF_000227685.2	REF81MG1128	Free-living	100	66.547	3756729	3756729	87.13	3441	3441	260	76
GCF_000227705.2	REF81MG1129	Free-living	100	60.57	4206343	4206343	88.01	3851	3851	288	76
GCF_000012845.1	REF81MG113	Free-living	100	45.06	4811379	4811379	91.29	3996	3996	315	53
GCF_000227725.1	REF81MG1130	Free-living	100	56.705	3188869	3188869	89.62	2867	2867	259	61
GCF_000227745.2	REF81MG1131	Free-living	100	62.607	5017071	5017071	88.13	4572	4572	260	72
GCF_000227765.1	REF81MG1132	Free-living	100	47.418	2467075	2467075	83.51	2285	2285	248	105
GCF_000228725.2	REF81MG1133	Free-living	100	60.162	5342862	5342862	87.2	4898	4898	247	76
GCF_000230275.1	REF81MG1134	Free-living	100	50.021	2487765	2487765	87.88	2365	2365	275	46
GCF_000230555.1	REF81MG1135	Free-living	100	61.369	3944837	3944837	90.25	3847	3847	278	58
GCF_000230695.2	REF81MG1136	Free-living	100	67.454	4225490	4225490	89.72	3835	3835	272	71
GCF_000230715.2	REF81MG1137	Free-living	100	62.236	3788356	3788356	83.93	3756	3756	240	100
GCF_000230735.2	REF81MG1138	Free-living	100	64.932	3790479	3790479	85.09	3766	3766	246	102
GCF_000230895.2	REF81MG1139	Free-living	100	65.491	6415739	6415739	92.68	6267	6267	278	30
GCF_000012865.1	REF81MG114	Free-living	100	42.05	2401520	2401520	91.37	2473	2473	259	26
GCF_000230915.1	REF81MG1140	Free-living	100	51.836	6805951	6805951	85.78	6139	6139	280	113
GCF_000230935.1	REF81MG1141	Free-living	100	66.073	7281599	7281599	91.87	7005	7005	278	30
GCF_000230955.2	REF81MG1142	Free-living	100	67.485	2846968	2846968	88.86	2976	2976	247	63
GCF_000231015.2	REF81MG1143	Free-living	100	44.829	1384116	1384116	90.04	1476	1476	243.5	37
GCF_000231035.2	REF81MG1144	Free-living	100	70.506	4669397	4669397	80.66	4632	4632	229	101
GCF_000231055.2	REF81MG1145	Free-living	100	69.941	4763852	4763852	89.01	4404	4404	269	60
GCF_000231275.1	REF81MG1146	Free-living	100	54.669	2855429	2855429	87.8	2341	2341	308	102
GCF_000231305.1	REF81MG1147	Free-living	100	64.231	3373426	3373426	81.53	3024	3024	268	65
GCF_000231385.2	REF81MG1148	Free-living	100	41.784	4873567	4873567	84.48	4480	4480	260	103
GCF_000231405.2	REF81MG1149	Free-living	100	41.893	3176073	3176073	87.72	3023	3023	264	82
GCF_000012885.1	REF81MG115	Free-living	100	55.114	3665893	3665893	86.94	3233	3233	283	87
GCF_000231445.1	REF81MG1150	Free-living	100	36.846	2454778	2454778	90.6	2231	2231	277	62
GCF_000233435.1	REF81MG1151	Obligate intracellular symbiont	100	27.479	587248	587248	95.5	545	545	294	14
GCF_000233455.1	REF81MG1152	Free-living	100	48.756	6647380	6647380	88.87	6035	6035	292	58
GCF_000233535.1	REF81MG1153	Free-living	100	66.291	2163862	2163862	86.88	1886	1886	289.5	92
GCF_000233655.1	REF81MG1154	Free-living	100	72.369	3784483	3784483	89.99	3370	3370	297	71
GCF_000233695.2	REF81MG1155	Free-living	100	47.17	3974658	3974658	88.42	3662	3662	267	50
GCF_000233715.2	REF81MG1156	Free-living	100	45.491	4855529	4855529	83.06	4589	4589	242	105
GCF_000233775.1	REF81MG1157	Free-living	100	47.058	1967774	1967774	93.51	1905	1905	291	29
GCF_000233915.3	REF81MG1158	Free-living	100	67.653	3452554	3452554	88.42	3115	3115	273	79
GCF_000234115.1	REF81MG1159	Free-living	100	45.398	2593873	2593873	87.2	2125	2125	291	80
GCF_000012925.1	REF81MG116	Free-living	100	59.51	3997420	3997420	90.94	3571	3571	290	56
GCF_000234355.1	REF81MG1160	Free-living	100	59.04	2887061	2887061	90.48	2704	2704	276	52
GCF_000234585.1	REF81MG1161	Free-living	100	69.022	4870742	4870742	92.19	4593	4593	285	36
GCF_000235405.2	REF81MG1162	Free-living	100	38.875	2166381	2166381	92.16	1997	1997	297	36
GCF_000235425.2	REF81MG1163	Free-living	100	71.72	9978592	9978592	84.21	8201	8201	295	120
GCF_000235445.1	REF81MG1164	Free-living	100	35.54	2687075	2687075	86.12	2325	2325	274	90
GCF_000235505.1	REF81MG1165	Free-living	100	49.633	5697783	5697783	89.06	5102	5102	283	54
GCF_000235565.1	REF81MG1166	Free-living	100	60.627	2559043	2559043	87.48	2466	2466	254	74
GCF_000235605.1	REF81MG1167	Free-living	100	42.855	5863081	5863081	85.73	5423	5423	267	87
GCF_000235645.1	REF81MG1168	Free-living	100	31.91	2542035	2542035	86.61	2371	2371	251	93
GCF_000235685.2	REF81MG1169	Free-living	100	56.5	2052856	2052856	89.52	2055	2055	254	49
GCF_000012965.1	REF81MG117	Free-living	100	34.462	2201561	2201561	94.32	2162	2162	271.5	13
GCF_000235885.1	REF81MG1170	Free-living	100	48.922	3097322	3097322	89.14	2622	2622	284	75
GCF_000236035.1	REF81MG1171	Free-living	100	53.749	4208238	4208238	88.54	3795	3795	286	69
GCF_000236085.2	REF81MG1172	Obligate intracellular symbiont	100	27.026	1260174	1260174	63.21	2190	2190	86	115
GCF_000236165.1	REF81MG1173	Free-living	100	39.645	3689573	3689573	88.99	3233	3233	282	90
GCF_000236405.1	REF81MG1174	Obligate intracellular symbiont	100	23.847	605745	605745	92.88	549	549	290	27
GCF_000236565.1	REF81MG1175	Free-living	100	62.652	6965624	6965624	87.46	6875	6875	248	69
GCF_000236625.2	REF81MG1176	Free-living	100	53.93	3613819	3613819	90.58	3245	3245	285	67
GCF_000236665.1	REF81MG1177	Free-living	100	65.368	3806980	3806980	90.14	3436	3436	281	57
GCF_000236685.1	REF81MG1178	Free-living	100	46.197	3590853	3590853	90.74	3205	3205	307	43
GCF_000236705.1	REF81MG1179	Free-living	100	40.234	4000057	4000057	91.86	3510	3510	276.5	57
GCF_000012985.1	REF81MG118	Free-living	100	53.87	7215267	7215267	88.03	6369	6369	268	79
GCF_000236865.1	REF81MG1180	Free-living	100	60.92	2395498	2395498	83.99	1931	1931	294	120
GCF_000237065.1	REF81MG1181	Free-living	100	60.784	6845832	6845832	88.43	6034	6034	287	88.5
GCF_000237085.1	REF81MG1182	Free-living	100	35.717	4897678	4897678	83.71	4203	4203	261	123
GCF_000237145.1	REF81MG1183	Free-living	100	71.317	9239851	9239851	88.59	8247	8247	273	66
GCF_000237205.1	REF81MG1184	Free-living	100	41.776	2496337	2496337	91.16	2223	2223	280	48
GCF_000237285.1	REF81MG1185	Free-living	100	45.76	1755458	1755458	92.41	1811	1811	253	10
GCF_000237805.1	REF81MG1186	Free-living	100	59.5	1675934	1675934	90.39	1531	1531	290	38
GCF_000237825.1	REF81MG1187	Free-living	100	58.777	1880838	1880838	91.88	1806	1806	284	37
GCF_000237865.1	REF81MG1188	Free-living	100	47.783	3148033	3148033	78.81	2975	2975	229	145
GCF_000237995.1	REF81MG1189	Free-living	100	36.82	1829111	1829111	88.9	1744	1744	265	69.5
GCF_000013005.1	REF81MG119	Free-living	100	63.069	3052398	3052398	91.97	2964	2964	268	48
GCF_000238055.2	REF81MG1190	Free-living	100	42.17	2470863	2470863	87.92	2127	2127	295	97
GCF_000238095.2	REF81MG1191	Free-living	100	29.927	2325163	2325163	83.81	1962	1962	282.5	108
GCF_000238215.1	REF81MG1192	Free-living	100	46.976	3405521	3405521	89.71	2843	2843	301	49
GCF_000238255.2	REF81MG1193	Free-living	100	40.803	4715871	4715871	90.16	4207	4207	273	64
GCF_000238275.2	REF81MG1194	Free-living	100	39.942	3996746	3996746	89.82	3564	3564	279.5	70
GCF_000238375.2	REF81MG1195	Free-living	100	41.119	5300576	5300576	89.93	4428	4428	281	69
GCF_000238795.1	REF81MG1196	Free-living	100	39.708	2134694	2134694	90.77	2004	2004	266	68
GCF_000238815.1	REF81MG1197	Free-living	100	50.476	2458945	2458945	92.01	2329	2329	284	42.5
GCF_000238915.1	REF81MG1198	Free-living	100	66.211	4950067	4950067	89.48	4480	4480	292	73
GCF_000238995.1	REF81MG1199	Membrane asociated or intracellular parasite	100	35.334	919992	919992	62.97	2000	2000	67	102
GCF_000007365.1	REF81MG12	Obligate intracellular symbiont	100	25.331	641454	641454	89.09	600	600	268.5	66.5
GCF_000013025.1	REF81MG120	Free-living	100	61.93	3705021	3705021	91.06	3498	3498	276	60
GCF_000239275.1	REF81MG1200	Free-living	100	48.882	1798854	1798854	88.76	1925	1925	236	35
GCF_000239355.1	REF81MG1201	Free-living	100	58.11	2553535	2553535	89.21	2522	2522	242	54
GCF_000239695.1	REF81MG1202	Free-living	100	57.571	2205725	2205725	87.99	1848	1848	304	81
GCF_000239815.1	REF81MG1203	Free-living	100	63.599	8434788	8434788	87.12	7729	7729	274	93
GCF_000240075.2	REF81MG1204	Free-living	100	31.465	3162432	3162432	87.54	2724	2724	274	78
GCF_000240165.1	REF81MG1205	Free-living	100	72.94	6282967	6282967	87.29	5500	5500	277	84.5
GCF_000240225.1	REF81MG1206	Free-living	100	74.082	5090617	5090617	91.47	4498	4498	291.5	59
GCF_000240505.1	REF81MG1207	Free-living	100	68.182	4583671	4583671	93.31	4557	4557	252	32
GCF_000241055.1	REF81MG1208	Free-living	100	42.702	1833925	1833925	91.43	1823	1823	275	35
GCF_000241145.1	REF81MG1209	Free-living	100	32.489	1855559	1855559	90.68	2384	2384	167	47
GCF_000013125.1	REF81MG121	Obligate intracelullar parasite	100	41.636	1471282	1471282	72.16	1241	1241	210	167
GCF_000241265.1	REF81MG1210	Free-living	100	68.034	3904351	3904351	92.65	3700	3700	278	37
GCF_000241305.1	REF81MG1211	Free-living	100	62.459	4700208	4700208	91.49	4440	4440	275	48
GCF_000241345.1	REF81MG1212	Free-living	100	67.448	5304425	5304425	90.48	4678	4678	294	65
GCF_000241465.1	REF81MG1213	Free-living	100	63.388	4264936	4264936	89.35	3965	3965	265	50
GCF_000242235.1	REF81MG1214	Free-living	100	54.934	2313632	2313632	89.41	2066	2066	282	42
GCF_000242255.2	REF81MG1215	Free-living	100	63.396	3603458	3603458	87.76	3182	3182	285	74
GCF_000242335.1	REF81MG1216	Free-living	100	55.919	3341085	3341085	89.52	2630	2630	315	64
GCF_000242435.1	REF81MG1217	Free-living	100	49.61	2499879	2499879	79.35	2140	2140	261.5	103
GCF_000242455.2	REF81MG1218	Free-living	100	62.266	9629675	9629675	83.58	7421	7421	306	141
GCF_000242595.2	REF81MG1219	Free-living	100	57.766	3285855	3285855	94.27	2807	2807	320	30
GCF_000013145.1	REF81MG122	Obligate intracelullar parasite	100	30.101	1176248	1176248	78.32	927	927	266	187.5
GCF_000242615.2	REF81MG1220	Free-living	100	62.895	4127237	4127237	90.02	3584	3584	295	51
GCF_000242635.2	REF81MG1221	Free-living	100	37.309	5202069	5202069	88.61	4432	4432	271	90
GCF_000242715.1	REF81MG1222	Free-living	100	70.59	11005945	11005945	89.45	9740	9740	281	74
GCF_000242835.1	REF81MG1223	Free-living	100	64.371	4760413	4760413	86.74	4316	4316	264	70
GCF_000242875.2	REF81MG1224	Free-living	100	33.794	1572957	1572957	91.32	1953	1953	184	42
GCF_000242895.2	REF81MG1225	Free-living	100	37.954	4815602	4815602	82.86	4654	4654	248	116
GCF_000242915.1	REF81MG1226	Free-living	100	33.597	2952682	2952682	94.49	2874	2874	272	16
GCF_000242935.2	REF81MG1227	Free-living	100	63.569	7317842	7317842	89	5906	5906	301	86
GCF_000242955.1	REF81MG1228	Free-living	100	37.513	3098456	3098456	85.53	2858	2858	258	69
GCF_000243115.2	REF81MG1229	Free-living	100	45.237	4697343	4697343	88.82	3889	3889	300	87
GCF_000013165.1	REF81MG123	Obligate intracelullar parasite	100	41.084	859006	859006	85.79	780	780	255.5	96
GCF_000243135.2	REF81MG1230	Free-living	100	44.218	3624449	3624449	87.52	3403	3403	264	85
GCF_000243155.2	REF81MG1231	Free-living	100	44.969	4321753	4321753	86.3	4126	4126	256	82
GCF_000243215.1	REF81MG1232	Free-living	100	40.336	3773011	3773011	87.17	3080	3080	304	85
GCF_000243235.1	REF81MG1233	Free-living	100	37.584	3966857	3966857	86.47	3517	3517	270	85
GCF_000243255.1	REF81MG1234	Free-living	100	42.194	3200946	3200946	86.84	3048	3048	249	77
GCF_000243275.1	REF81MG1235	Free-living	100	35.766	4301842	4301842	86.43	3785	3785	261	75
GCF_000243315.1	REF81MG1236	Free-living	100	47.576	2817452	2817452	82.35	3268	3268	188	53
GCF_000243335.1	REF81MG1237	Free-living	100	54.244	4522760	4522760	91.17	4255	4255	273	52
GCF_000243395.2	REF81MG1238	Free-living	100	69.129	4538746	4538746	89.92	4262	4262	280	54
GCF_000243455.1	REF81MG1239	Free-living	100	32.443	1818783	1818783	89.88	1960	1960	229.5	47
GCF_000013185.1	REF81MG124	Obligate intracellular symbiont	100	33.235	686194	686194	88.31	606	606	284	65
GCF_000243715.2	REF81MG1240	Free-living	100	42.993	4395904	4395904	89.55	3970	3970	276	57
GCF_000243735.2	REF81MG1241	Free-living	100	44.82	4418431	4418431	90.82	3995	3995	285	55
GCF_000243815.2	REF81MG1242	Free-living	100	40.198	4223089	4223089	83.91	3996	3996	240.5	68
GCF_000244515.1	REF81MG1243	Free-living	100	35.889	4317431	4317431	78.02	3520	3520	270	91
GCF_000244755.1	REF81MG1244	Free-living	100	41.13	4210826	4210826	92.2	3863	3863	281	44
GCF_000244815.1	REF81MG1245	Free-living	100	40.463	4323312	4323312	82.59	4379	4379	216	64
GCF_000244895.1	REF81MG1246	Free-living	100	44.156	5660978	5660978	85.37	5274	5274	260	87
GCF_000244955.1	REF81MG1247	Free-living	100	68.936	5965593	5965593	90.63	5689	5689	279	48
GCF_000244975.1	REF81MG1248	Free-living	100	69.735	5408301	5408301	90.42	5098	5098	278	54
GCF_000244995.1	REF81MG1249	Free-living	100	68.757	5600627	5600627	90.85	4893	4893	294	34
GCF_000013205.1	REF81MG125	Free-living	100	60.237	2932766	2932766	86.18	2740	2740	260	94
GCF_000245015.1	REF81MG1250	Free-living	100	40.721	4265146	4265146	86.46	3502	3502	283	97
GCF_000245055.1	REF81MG1251	Free-living	100	65.241	4590519	4590519	86.91	3984	3984	284	87
GCF_000245075.1	REF81MG1252	Free-living	100	66.965	5190553	5190553	90.64	4848	4848	289	52
GCF_000245555.1	REF81MG1253	Free-living	100	54.128	6375964	6375964	86.48	5727	5727	279	96
GCF_000245755.1	REF81MG1254	Free-living	100	29.166	2096464	2096464	86.27	1863	1863	272	38
GCF_000245775.1	REF81MG1255	Free-living	100	31.108	2562512	2562512	88.17	2477	2477	264	51
GCF_000245795.1	REF81MG1256	Free-living	100	43.623	1717767	1717767	84.96	1516	1516	278	73.5
GCF_000245815.1	REF81MG1257	Free-living	100	39.225	1862135	1862135	86.49	1683	1683	277	74
GCF_000246855.1	REF81MG1258	Free-living	100	44.87	9033684	9033684	88.31	7294	7294	289	92
GCF_000246875.1	REF81MG1259	Free-living	100	64.09	4992811	4992811	91.38	4491	4491	291	65
GCF_000013225.1	REF81MG126	Free-living	100	58.45	3046682	3046682	86.24	2831	2831	267	96
GCF_000246895.1	REF81MG1260	Free-living	100	29.851	3960597	3960597	84.5	3611	3611	261	123
GCF_000246925.1	REF81MG1261	Free-living	100	29.903	1881849	1881849	91.74	1802	1802	260	20
GCF_000246945.1	REF81MG1262	Free-living	100	31.345	3447772	3447772	87.85	2979	2979	274	72
GCF_000246985.2	REF81MG1263	Free-living	100	43.087	2215172	2215172	91.52	2487	2487	233	27
GCF_000247475.1	REF81MG1264	Free-living	100	60.249	5505000	5505000	89.82	5193	5193	269	73
GCF_000247565.1	REF81MG1265	Obligate intracellular symbiont	100	25.224	719535	719535	87.85	648	648	277	60.5
GCF_000247605.1	REF81MG1266	Free-living	100	39.338	4044777	4044777	86.82	3618	3618	268	87
GCF_000247645.1	REF81MG1267	Free-living	100	60.108	3109262	3109262	92.58	3060	3060	280	44
GCF_000247715.1	REF81MG1268	Free-living	100	67.019	5669805	5669805	91.31	5068	5068	297	56
GCF_000247995.1	REF81MG1269	Free-living	100	71.912	3540942	3540942	88.81	3044	3044	295	95
GCF_000013285.1	REF81MG127	Free-living	100	28.379	3256683	3256683	85.08	2879	2879	266	120
GCF_000248015.1	REF81MG1270	Free-living	100	54.077	4495280	4495280	89.11	4140	4140	276	61
GCF_000248055.1	REF81MG1271	Free-living	100	65.346	4946556	4946556	91.15	4499	4499	289	57
GCF_000248095.2	REF81MG1272	Free-living	100	46.47	2326299	2326299	86.91	2098	2098	271.5	76
GCF_000250635.1	REF81MG1273	Free-living	100	46.36	4345237	4345237	83.65	3431	3431	274	120.5
GCF_000250655.1	REF81MG1274	Free-living	100	58.309	8739048	8739048	85.56	7467	7467	281	116
GCF_000250675.2	REF81MG1275	Free-living	100	68.047	9436348	9436348	88.82	8516	8516	280	69
GCF_000250875.1	REF81MG1276	Free-living	100	65.049	2376899	2376899	86.54	1983	1983	277	107
GCF_000251105.1	REF81MG1277	Free-living	100	52.74	2378438	2378438	89.82	2508	2508	251.5	39
GCF_000252125.1	REF81MG1278	Free-living	100	34.373	3934101	3934101	88.33	3410	3410	277	85
GCF_000252165.1	REF81MG1279	Free-living	100	43.095	3076861	3076861	87.73	2709	2709	282	80
GCF_000013325.1	REF81MG128	Free-living	100	65.153	3561584	3561584	91.77	3377	3377	273	46
GCF_000252445.1	REF81MG1280	Free-living	100	70.802	3137147	3137147	90.05	2983	2983	270	68
GCF_000252625.1	REF81MG1281	Free-living	100	38.63	2805392	2805392	91.62	2925	2925	234	46
GCF_000252855.1	REF81MG1282	Free-living	100	35.005	2164087	2164087	91.28	2025	2025	258	54
GCF_000252955.1	REF81MG1283	Free-living	100	44.152	4432590	4432590	85.13	3940	3940	246	91
GCF_000253015.1	REF81MG1284	Facultative intracelullar parasite	100	35.727	1522743	1522743	81.64	1247	1247	277	113
GCF_000253035.1	REF81MG1285	Free-living	100	39.029	3072383	3072383	88.98	2569	2569	286	62.5
GCF_000253055.1	REF81MG1286	Free-living	100	55.128	1841542	1841542	90.81	2079	2079	232	28.5
GCF_000253115.1	REF81MG1287	Free-living	100	63.668	3738778	3738778	90.98	3519	3519	275	46
GCF_000253175.1	REF81MG1288	Free-living	100	47.015	4553420	4553420	85.24	4155	4155	267	102
GCF_000253235.1	REF81MG1289	Free-living	100	72.4	8226158	8226158	89.18	7326	7326	285	77
GCF_000013345.1	REF81MG129	Free-living	100	70.079	5433628	5433628	84.9	4762	4762	274	100
GCF_000253275.1	REF81MG1290	Free-living	100	32.858	3559884	3559884	86.74	3108	3108	266	74
GCF_000253295.1	REF81MG1291	Free-living	100	59.171	4757528	4757528	87.6	4610	4610	257	77
GCF_000253395.1	REF81MG1292	Free-living	100	38.921	1929905	1929905	85.52	1996	1996	227.5	77
GCF_000255115.2	REF81MG1293	Free-living	100	42.143	4926837	4926837	83.32	4562	4562	257	111
GCF_000255135.1	REF81MG1294	Free-living	100	29.156	2231407	2231407	93.12	2057	2057	297	20
GCF_000255295.1	REF81MG1295	Free-living	100	69.897	10080619	10080619	91.63	8120	8120	303	59
GCF_000255355.1	REF81MG1296	Obligate intracelullar parasite	100	32.2	1369927	1369927	81.42	1603	1603	157	113.5
GCF_000255455.1	REF81MG1297	Free-living	100	32.78	4257070	4257070	88.38	3536	3536	279	80
GCF_000255495.1	REF81MG1298	Free-living	100	37.632	2182354	2182354	90.26	2105	2105	262	57
GCF_000255535.1	REF81MG1299	Free-living	100	52.189	4962173	4962173	88.21	4535	4535	283	77
GCF_000007385.1	REF81MG13	Free-living	100	63.693	4941439	4941439	85.13	4821	4821	233	89
GCF_000013365.1	REF81MG130	Free-living	100	66.038	5331656	5331656	87.1	4733	4733	278	105
GCF_000255555.1	REF81MG1300	Free-living	100	53.175	3453898	3453898	89.24	2819	2819	302	78
GCF_000255655.1	REF81MG1301	Free-living	100	55.258	8702386	8702386	84.15	6849	6849	300	136
GCF_000255705.1	REF81MG1302	Free-living	100	57.749	10086423	10086423	85.43	8668	8668	254	84
GCF_000257395.1	REF81MG1303	Obligate intracelullar parasite	100	38.888	1727973	1727973	80.15	2260	2260	159	60.5
GCF_000257665.1	REF81MG1304	Free-living	100	51.658	1359661	1359661	94.43	1339	1339	285	15
GCF_000257745.1	REF81MG1305	Free-living	100	66.109	4434076	4434076	92.22	4270	4270	273	35
GCF_000258175.1	REF81MG1306	Free-living	100	68.927	4776006	4776006	89.81	4391	4391	275	62
GCF_000258345.2	REF81MG1307	Facultative intracellular symbiont	100	40.454	1793760	1793760	87.63	1716	1716	238	56
GCF_000258405.1	REF81MG1308	Free-living	100	33.933	3658997	3658997	92.46	3140	3140	302	32
GCF_000258495.1	REF81MG1309	Free-living	100	38.004	5133539	5133539	88.69	4797	4797	239	76
GCF_000013405.1	REF81MG131	Free-living	100	51.46	3179300	3179300	86.47	2917	2917	269	76
GCF_000258515.1	REF81MG1310	Free-living	100	54.477	1764559	1764559	91.14	1853	1853	243	38
GCF_000258765.1	REF81MG1311	Free-living	100	34.843	2974905	2974905	89.74	3031	3031	237	64
GCF_000259075.1	REF81MG1312	Free-living	100	41.931	4978294	4978294	87.15	3926	3926	303	98
GCF_000259095.1	REF81MG1313	Free-living	100	64.23	4598615	4598615	89.36	4372	4372	266	62
GCF_000259175.1	REF81MG1314	Free-living	100	41.266	4402109	4402109	83.84	4144	4144	247	87
GCF_000259255.1	REF81MG1315	Free-living	100	34.535	1947646	1947646	89.88	1766	1766	267	26
GCF_000259275.1	REF81MG1316	Free-living	100	35.558	1833666	1833666	90.25	1710	1710	264	30
GCF_000260115.1	REF81MG1317	Free-living	100	33.594	4508243	4508243	87.08	3931	3931	275	86
GCF_000260135.1	REF81MG1318	Free-living	100	54.858	4691711	4691711	91.42	4654	4654	247	37
GCF_000260275.1	REF81MG1319	Free-living	100	38.717	2454960	2454960	85.44	2312	2312	257	108
GCF_000013445.1	REF81MG132	Free-living	100	45.149	3544738	3544738	89.12	3402	3402	249	44.5
GCF_000260635.1	REF81MG1320	Free-living	100	39.099	2263660	2263660	88.32	2199	2199	233	86
GCF_000260835.1	REF81MG1321	Free-living	100	35.5	3084990	3084990	91.83	2707	2707	285	53
GCF_000260965.1	REF81MG1322	Free-living	100	47.797	2697465	2697465	93.05	2563	2563	269	25
GCF_000260985.3	REF81MG1323	Free-living	100	44.749	3137191	3137191	90.52	2983	2983	268	36
GCF_000261025.1	REF81MG1324	Free-living	100	43.478	2699437	2699437	85.87	2319	2319	280	77
GCF_000261485.1	REF81MG1325	Free-living	100	62.04	5963223	5963223	87.23	5578	5578	269	90
GCF_000262225.1	REF81MG1326	Free-living	100	34.918	2110802	2110802	92.79	2015	2015	271	22
GCF_000262245.1	REF81MG1327	Free-living	100	36.081	2253160	2253160	89.9	2149	2149	266	70
GCF_000262305.1	REF81MG1328	Free-living	100	56.508	4158725	4158725	88.55	3807	3807	278	64
GCF_000262405.1	REF81MG1329	Free-living	100	63.003	7082538	7082538	84.98	6983	6983	251	87.5
GCF_000013565.1	REF81MG133	Free-living	100	62.332	4317977	4317977	90.47	4275	4275	269	56
GCF_000262545.1	REF81MG1330	Free-living	100	39.843	2521238	2521238	87.29	2136	2136	292.5	76
GCF_000262715.1	REF81MG1331	Obligate intracellular symbiont	100	25.672	629165	629165	95.59	576	576	302.5	15
GCF_000263195.1	REF81MG1332	Free-living	100	35.698	4798158	4798158	89.51	3972	3972	299	89
GCF_000263355.1	REF81MG1333	Free-living	100	48.815	4850682	4850682	90.16	4129	4129	293	77
GCF_000263735.1	REF81MG1334	Free-living	100	42.293	1736885	1736885	93.26	1821	1821	256	17
GCF_000264055.1	REF81MG1335	Free-living	100	34.831	3943456	3943456	85.53	3528	3528	248	97
GCF_000264315.1	REF81MG1336	Free-living	100	65.67	3866812	3866812	90.29	3401	3401	283	77
GCF_000264335.1	REF81MG1337	Free-living	100	64.667	4229936	4229936	89.47	3998	3998	247	81.5
GCF_000264455.2	REF81MG1338	Free-living	100	68.145	3919492	3919492	90.25	3590	3590	291	66
GCF_000264495.1	REF81MG1339	Free-living	100	55.641	1356318	1356318	92.02	1418	1418	254.5	34
GCF_000013605.1	REF81MG134	Free-living	100	59.879	4712337	4712337	90.39	4297	4297	288	50
GCF_000265075.1	REF81MG1340	Free-living	100	48.581	3633701	3633701	89.88	4134	4134	213	43
GCF_000265245.1	REF81MG1341	Free-living	100	67.857	3561919	3561919	89.08	3219	3219	290	80
GCF_000265295.1	REF81MG1342	Free-living	100	38.818	2510109	2510109	94.23	2510	2510	267.5	14
GCF_000265365.1	REF81MG1343	Free-living	100	56.646	3734239	3734239	88.87	3228	3228	292	59
GCF_000265385.1	REF81MG1344	Free-living	100	36.191	3520671	3520671	90.13	3192	3192	268	79
GCF_000265405.1	REF81MG1345	Free-living	100	36.813	4196595	4196595	88.75	3829	3829	267	71
GCF_000265425.1	REF81MG1346	Free-living	100	60.281	5227858	5227858	89.29	4347	4347	304	80
GCF_000265465.1	REF81MG1347	Free-living	100	37.218	2399175	2399175	91.26	2330	2330	253	47
GCF_000265505.1	REF81MG1348	Free-living	100	30.672	4919337	4919337	84.55	4056	4056	265	138
GCF_000265525.1	REF81MG1349	Free-living	100	55.818	1950313	1950313	91.82	2070	2070	245.5	37
GCF_000013625.1	REF81MG135	Free-living	100	54.234	4110251	4110251	90.07	3841	3841	268	64
GCF_000266885.1	REF81MG1350	Free-living	100	53.635	4384015	4384015	91.92	4151	4151	266	39
GCF_000266905.1	REF81MG1351	Free-living	100	68.686	5583723	5583723	92.72	5235	5235	285	31
GCF_000266925.1	REF81MG1352	Free-living	100	47.968	2160700	2160700	92.8	2047	2047	299	25
GCF_000266945.1	REF81MG1353	Free-living	100	50.078	6500104	6500104	83.43	5589	5589	269	115
GCF_000269565.1	REF81MG1354	Free-living	100	31.261	3861289	3861289	89.16	3833	3833	248	52
GCF_000269605.1	REF81MG1355	Free-living	100	52.931	1550817	1550817	89.33	1244	1244	314	84
GCF_000269805.1	REF81MG1356	Free-living	100	67.323	3371034	3371034	86.12	2801	2801	294	102
GCF_000269865.1	REF81MG1357	Free-living	100	40.633	3736359	3736359	86.82	3884	3884	242	77
GCF_000269905.1	REF81MG1358	Free-living	100	37.066	2897749	2897749	89.7	3147	3147	219	61.5
GCF_000269945.1	REF81MG1359	Free-living	100	38.767	1963964	1963964	88.62	1948	1948	254	70
GCF_000013645.1	REF81MG136	Free-living	100	62.628	9731138	9731138	86.19	8698	8698	289	91
GCF_000269985.1	REF81MG1360	Free-living	100	74.198	8783278	8783278	87.33	7565	7565	285	98
GCF_000270085.1	REF81MG1361	Free-living	100	36.556	1787941	1787941	91.6	1678	1678	273	41
GCF_000270145.1	REF81MG1362	Free-living	100	37.515	2362241	2362241	88.7	2281	2281	256	68
GCF_000270185.1	REF81MG1363	Free-living	100	31.428	1891014	1891014	80.92	1759	1759	245	112
GCF_000270205.1	REF81MG1364	Free-living	100	28.26	1620005	1620005	91.59	1539	1539	268	50
GCF_000270245.1	REF81MG1365	Free-living	100	67.268	5683123	5683123	89.75	5190	5190	282	62
GCF_000270285.1	REF81MG1366	Free-living	100	56.2	3123671	3123671	89.33	2632	2632	302	81
GCF_000270305.1	REF81MG1367	Free-living	100	50.74	2835737	2835737	89	2537	2537	292	70
GCF_000271305.1	REF81MG1368	Free-living	100	65.183	5193926	5193926	90.22	4457	4457	297	61
GCF_000271665.2	REF81MG1369	Free-living	100	39.51	5380816	5380816	86.02	4762	4762	276	101
GCF_000013665.1	REF81MG137	Free-living	100	45.826	5057531	5057531	87.53	4141	4141	285	93
GCF_000272005.1	REF81MG1370	Free-living	100	50.597	3491446	3491446	91.97	3170	3170	287	49
GCF_000272025.1	REF81MG1371	Free-living	100	63.667	3827340	3827340	89.56	3494	3494	279	67
GCF_000272145.2	REF81MG1372	Free-living	100	42.278	4213571	4213571	88.83	3713	3713	278	102
GCF_000272475.1	REF81MG1373	Free-living	100	62.714	4537185	4537185	89.42	4256	4256	263	64
GCF_000273375.1	REF81MG1374	Facultative intracelullar parasite	100	37.109	1834009	1834009	78.15	1618	1618	239.5	112
GCF_000275725.1	REF81MG1375	Free-living	100	60.249	3693745	3693745	90.24	3403	3403	283	62.5
GCF_000275865.1	REF81MG1376	Free-living	100	60.955	2475100	2475100	89.38	2432	2432	253	37
GCF_000276685.1	REF81MG1377	Free-living	100	37.341	1732123	1732123	93.54	1584	1584	281.5	18
GCF_000276805.1	REF81MG1378	Free-living	100	40.82	4889582	4889582	87.41	4250	4250	289	106
GCF_000277125.1	REF81MG1379	Free-living	100	68.101	5402402	5402402	91.66	5029	5029	282	41
GCF_000013705.1	REF81MG138	Free-living	100	55.719	2971517	2971517	90.85	2831	2831	264	49
GCF_000277715.1	REF81MG1380	Free-living	100	66.061	3449360	3449360	89.68	3048	3048	287	48
GCF_000277795.1	REF81MG1381	Membrane asociated or intracellular parasite	100	33.922	650228	650228	56.56	1214	1214	78	130
GCF_000278135.1	REF81MG1382	Facultative intracelullar parasite	100	37.417	1970822	1970822	77.03	1703	1703	230	109
GCF_000278155.1	REF81MG1383	Facultative intracelullar parasite	100	37.663	1810183	1810183	80.6	1560	1560	252	112
GCF_000278215.1	REF81MG1384	Facultative intracelullar parasite	100	35.078	2170653	2170653	70.47	1744	1744	230	121
GCF_000278295.1	REF81MG1385	Facultative intracelullar parasite	100	36.758	2015681	2015681	75.65	1720	1720	235	107
GCF_000279145.1	REF81MG1386	Free-living	100	41.328	3300414	3300414	93.49	2901	2901	302	19
GCF_000279995.1	REF81MG1387	Facultative intracelullar parasite	100	37.811	2254945	2254945	82.58	1971	1971	265	114
GCF_000280015.1	REF81MG1388	Facultative intracelullar parasite	100	36.27	1673902	1673902	76.29	1370	1370	260	115
GCF_000281085.1	REF81MG1389	Free-living	100	39.978	5032077	5032077	90.36	4093	4093	301	55
GCF_000013725.1	REF81MG139	Free-living	100	40.758	2575032	2575032	85.75	2607	2607	241	73
GCF_000281175.1	REF81MG1390	Free-living	100	58.767	5144873	5144873	89.46	4128	4128	326	69
GCF_000282595.1	REF81MG1391	Free-living	100	52.984	4997302	4997302	90.61	4838	4838	277.5	56
GCF_000282775.1	REF81MG1392	Free-living	100	54.221	4612865	4612865	88.8	4427	4427	258	65
GCF_000283015.1	REF81MG1393	Free-living	100	33.335	3384849	3384849	91.5	2962	2962	287	60
GCF_000283235.1	REF81MG1394	Free-living	100	63.358	4474183	4474183	87.67	4296	4296	248	80
GCF_000283315.1	REF81MG1395	Free-living	100	48.664	6916884	6916884	84.53	6236	6236	268	105
GCF_000283335.1	REF81MG1396	Free-living	100	62.201	4492306	4492306	86.62	4518	4518	253	87
GCF_000283495.2	REF81MG1397	Free-living	100	52.588	2474718	2474718	87.7	2220	2220	283	45
GCF_000283515.1	REF81MG1398	Free-living	100	65.57	4199332	4199332	89.3	3894	3894	267	68
GCF_000283555.1	REF81MG1399	Free-living	100	27.979	1515556	1515556	92.01	1397	1397	279	50
GCF_000007485.1	REF81MG14	Free-living	100	46.332	927303	927303	88.42	918	918	246.5	44.5
GCF_000013745.1	REF81MG140	Free-living	100	64.957	5513844	5513844	85.34	4965	4965	266	109
GCF_000283575.1	REF81MG1400	Free-living	100	53.321	4410036	4410036	84.22	4308	4308	241	78
GCF_000283595.1	REF81MG1401	Obligate intracelullar parasite	100	32.35	1283087	1283087	81.42	1447	1447	161	117
GCF_000283615.1	REF81MG1402	Free-living	100	36.041	2562720	2562720	86.68	2507	2507	255	81
GCF_000283655.1	REF81MG1403	Free-living	100	67.605	2988332	2988332	87.14	2762	2762	263	94
GCF_000283855.1	REF81MG1404	Obligate intracelullar parasite	100	32.605	1263719	1263719	80.94	1443	1443	160	110
GCF_000284015.1	REF81MG1405	Free-living	100	72.948	4875340	4875340	89.43	4630	4630	280	63
GCF_000284035.1	REF81MG1406	Free-living	100	68.366	6194645	6194645	88.86	5572	5572	274	76
GCF_000284075.1	REF81MG1407	Obligate intracelullar parasite	100	32.406	1290368	1290368	81.39	1491	1491	159	108.5
GCF_000284095.1	REF81MG1408	Free-living	100	50.678	3003680	3003680	90.88	2812	2812	276	42
GCF_000284115.1	REF81MG1409	Free-living	100	73.288	3803225	3803225	87.97	3033	3033	315	98
GCF_000013765.1	REF81MG141	Free-living	100	45.149	4545906	4545906	86.1	3902	3902	269	100
GCF_000284155.1	REF81MG1410	Obligate intracelullar parasite	100	32.284	1323280	1323280	80.12	1477	1477	159	125
GCF_000284235.1	REF81MG1411	Free-living	100	26.564	2945673	2945673	94.42	2873	2873	263	15
GCF_000284255.1	REF81MG1412	Free-living	100	71.243	5043253	5043253	92.45	4575	4575	292	29
GCF_000284295.1	REF81MG1413	Free-living	100	70.823	8773466	8773466	90.45	8063	8063	281	55.5
GCF_000284315.1	REF81MG1414	Free-living	100	50.048	2559538	2559538	89.95	2440	2440	268	46
GCF_000284335.1	REF81MG1415	Free-living	100	35.375	1558103	1558103	92.81	1515	1515	276	10
GCF_000284375.1	REF81MG1416	Free-living	100	63.666	9207384	9207384	84.75	8689	8689	263	99
GCF_000284415.1	REF81MG1417	Free-living	100	64.739	3876289	3876289	87.26	3499	3499	267	74
GCF_000284515.1	REF81MG1418	Free-living	100	41.823	4150632	4150632	83.11	4039	4039	252	96
GCF_000284615.1	REF81MG1419	Free-living	100	57.425	3989480	3989480	92.05	3644	3644	289	51
GCF_000013865.1	REF81MG142	Free-living	100	62.472	5200264	5200264	88.26	4944	4944	278	75
GCF_000284835.1	REF81MG1420	Free-living	100	35.58	2846106	2846106	86.15	2760	2760	257	102
GCF_000285455.1	REF81MG1421	Free-living	100	58.85	3486413	3486413	92.83	2698	2698	341	37
GCF_000285495.1	REF81MG1422	Free-living	100	39.739	3588444	3588444	82.83	3502	3502	249	95
GCF_000285515.1	REF81MG1423	Free-living	100	47.174	5602720	5602720	81.82	4982	4982	270	110
GCF_000285535.1	REF81MG1424	Free-living	100	36.873	4646132	4646132	84.53	4582	4582	256	100
GCF_000285555.1	REF81MG1425	Free-living	100	38.895	3222540	3222540	86.37	3188	3188	252	83.5
GCF_000285575.1	REF81MG1426	Free-living	100	26.468	3914239	3914239	78.96	3661	3661	237	121
GCF_000285595.1	REF81MG1427	Free-living	100	38.077	2981646	2981646	85.83	3024	3024	237	85
GCF_000285835.1	REF81MG1428	Free-living	100	69.4	3427329	3427329	89.94	3042	3042	301	60
GCF_000285915.1	REF81MG1429	Free-living	100	62.322	2349262	2349262	91.42	2105	2105	297	55
GCF_000013885.1	REF81MG143	Free-living	100	61.714	4406967	4406967	83.7	4223	4223	234	109
GCF_000286075.1	REF81MG1430	Free-living	100	40.79	2062017	2062017	87.01	1948	1948	266	78
GCF_000286315.1	REF81MG1431	Free-living	100	36.601	4115384	4115384	83.72	3796	3796	246	96
GCF_000286335.1	REF81MG1432	Free-living	100	32.38	2559484	2559484	91.09	2574	2574	260	60
GCF_000286395.1	REF81MG1433	Free-living	100	31.79	2769087	2769087	89.76	2821	2821	259	64
GCF_000286435.2	REF81MG1434	Free-living	100	51.139	3799539	3799539	87.86	3525	3525	267	69
GCF_000286895.2	REF81MG1435	Free-living	100	47.402	5611647	5611647	85.95	4912	4912	278	102
GCF_000287055.2	REF81MG1436	Free-living	100	43.321	4413663	4413663	87.8	3998	3998	273	102
GCF_000287335.1	REF81MG1437	Free-living	100	43.29	1441139	1441139	51.56	920	920	213	375.5
GCF_000287355.1	REF81MG1438	Free-living	100	28.903	1121596	1121596	49.88	578	578	268	605.5
GCF_000292245.2	REF81MG1439	Free-living	100	37.394	4370295	4370295	83.97	4208	4208	249	102
GCF_000013945.1	REF81MG144	Free-living	100	40.229	3931782	3931782	82.05	3606	3606	255	74
GCF_000293785.1	REF81MG1440	Free-living	100	69.284	4815770	4815770	86.29	4327	4327	265	110
GCF_000293805.1	REF81MG1441	Free-living	100	46.173	6553720	6553720	85.8	6405	6405	237	90
GCF_000293845.2	REF81MG1442	Free-living	100	47.4	1923658	1923658	93.15	1847	1847	280	33
GCF_000294515.1	REF81MG1443	Free-living	100	69.65	5848211	5848211	86.38	5118	5118	282	95.5
GCF_000294655.1	REF81MG1444	Free-living	100	61.507	3805617	3805617	90.77	3648	3648	256	47
GCF_000294675.1	REF81MG1445	Free-living	100	53.796	2967160	2967160	90.38	2893	2893	273	59
GCF_000294715.1	REF81MG1446	Facultative intracelullar parasite	100	38.757	1587646	1587646	75.5	1345	1345	246	122.5
GCF_000294775.2	REF81MG1447	Free-living	100	41.243	5461741	5461741	85.04	5437	5437	249	102
GCF_000295095.1	REF81MG1448	Free-living	100	70.716	2932944	2932944	87.64	2474	2474	297	80
GCF_000295715.1	REF81MG1449	Free-living	100	33.494	2565675	2565675	85.96	2513	2513	253	95
GCF_000013985.1	REF81MG145	Free-living	100	65.502	3345170	3345170	90.45	3204	3204	264	59
GCF_000295935.2	REF81MG1450	Free-living	100	39.677	5036047	5036047	89.63	4331	4331	288	72
GCF_000296385.1	REF81MG1451	Free-living	100	36.157	2932121	2932121	89.9	2658	2658	285	34
GCF_000296405.1	REF81MG1452	Free-living	100	70.45	2118285	2118285	85.05	1795	1795	294	100
GCF_000296445.1	REF81MG1453	Free-living	100	57.17	2119335	2119335	86.66	1797	1797	292	106
GCF_000296465.1	REF81MG1454	Free-living	100	43.781	3443906	3443906	89.56	2799	2799	305	50
GCF_000296505.1	REF81MG1455	Free-living	100	56.707	1967755	1967755	88.74	1717	1717	294	77.5
GCF_000296695.1	REF81MG1456	Free-living	100	51.334	3987205	3987205	92.03	3642	3642	274	49
GCF_000296775.1	REF81MG1457	Free-living	100	39.236	2125769	2125769	91.77	2150	2150	256	37
GCF_000296795.1	REF81MG1458	Free-living	100	40.049	4087350	4087350	84.52	3595	3595	271	90
GCF_000296815.2	REF81MG1459	Free-living	100	52.784	7452326	7452326	89.72	6232	6232	292	85
GCF_000014005.1	REF81MG146	Free-living	100	58.384	5650368	5650368	90.26	4995	4995	279	67
GCF_000296835.1	REF81MG1460	Free-living	100	35.145	1928135	1928135	91.19	1877	1877	253	55
GCF_000296855.1	REF81MG1461	Free-living	100	36.932	1926643	1926643	90.61	1891	1891	258	59
GCF_000297025.1	REF81MG1462	Free-living	100	38.61	1905398	1905398	89.36	1806	1806	267	63
GCF_000297055.2	REF81MG1463	Free-living	100	56.104	3130594	3130594	91.43	2988	2988	266.5	43
GCF_000297095.1	REF81MG1464	Free-living	100	50.814	3772614	3772614	93.39	3339	3339	296	25
GCF_000297115.1	REF81MG1465	Free-living	100	32.763	2631646	2631646	91.65	2665	2665	250	32
GCF_000297135.1	REF81MG1466	Free-living	100	38.47	619426	619426	94.74	634	634	223.5	13
GCF_000297255.1	REF81MG1467	Free-living	100	62.56	3888104	3888104	86.52	3940	3940	200	99
GCF_000297395.2	REF81MG1468	Free-living	100	71.917	7325824	7325824	88.71	6669	6669	279	74
GCF_000297495.1	REF81MG1469	Free-living	100	71.323	3137780	3137780	90.62	3141	3141	257	43
GCF_000014025.1	REF81MG147	Free-living	100	27.045	2341251	2341251	94.43	2279	2279	270	18
GCF_000297555.1	REF81MG1470	Free-living	100	36.907	3820970	3820970	84.17	3612	3612	257	93
GCF_000297775.1	REF81MG1471	Free-living	100	60.236	2725870	2725870	84.2	2357	2357	270	95
GCF_000298075.1	REF81MG1472	Free-living	100	35.817	2366595	2366595	82.47	2200	2200	254.5	89
GCF_000298115.2	REF81MG1473	Free-living	100	44.369	2500564	2500564	87.75	2361	2361	268	84
GCF_000298175.1	REF81MG1474	Free-living	100	66.154	3541124	3541124	88.68	3046	3046	300	77
GCF_000298195.1	REF81MG1475	Free-living	100	67.007	6430000	6430000	91.1	5854	5854	289.5	54
GCF_000298215.1	REF81MG1476	Free-living	100	70.425	4846768	4846768	89.72	4336	4336	290	72.5
GCF_000298295.1	REF81MG1477	Free-living	100	40.96	4842844	4842844	90.81	4214	4214	280	60
GCF_000299095.1	REF81MG1478	Free-living	100	28.632	1343202	1343202	96.96	1431	1431	261	3
GCF_000299115.1	REF81MG1479	Free-living	100	32.263	1410127	1410127	96.82	1490	1490	279	4
GCF_000014045.1	REF81MG148	Free-living	100	58.969	4133097	4133097	90.77	3900	3900	280.5	53.5
GCF_000299235.1	REF81MG1480	Free-living	100	54.551	2406157	2406157	90.82	2350	2350	265	37
GCF_000299335.2	REF81MG1481	Free-living	100	62.598	4168427	4168427	90.2	3723	3723	277	62
GCF_000299355.1	REF81MG1482	Free-living	100	29.935	3105335	3105335	84.08	2976	2976	247	92
GCF_000299395.1	REF81MG1483	Free-living	100	33.589	1690905	1690905	90.39	2110	2110	192.5	42
GCF_000299575.1	REF81MG1484	Free-living	100	67.373	2897133	2897133	93.59	2836	2836	279	31
GCF_000299875.1	REF81MG1485	Free-living	100	58.276	4333597	4333597	90.29	4232	4232	273	57
GCF_000299895.1	REF81MG1486	Free-living	100	49.487	2895115	2895115	92.42	2661	2661	269	42
GCF_000299915.1	REF81MG1487	Free-living	100	60.583	4061567	4061567	91.67	3762	3762	269	44
GCF_000299935.1	REF81MG1488	Free-living	100	65.496	3952792	3952792	91.26	3731	3731	278	47
GCF_000300005.1	REF81MG1489	Free-living	100	61.632	4928223	4928223	90.12	4405	4405	290	62
GCF_000014125.1	REF81MG149	Free-living	100	28.856	2547720	2547720	88.96	2320	2320	277	74
GCF_000300075.1	REF81MG1490	Free-living	100	26.211	351658	351658	70.26	257	257	258	22
GCF_000300115.1	REF81MG1491	Free-living	100	40.691	9974934	9974934	80.09	7993	7993	249	160
GCF_000300135.1	REF81MG1492	Free-living	100	37.241	1645096	1645096	89.58	1559	1559	272	66
GCF_000300195.1	REF81MG1493	Free-living	100	31.208	4302430	4302430	82.04	3941	3941	255	142
GCF_000300235.2	REF81MG1494	Free-living	100	54.85	4576570	4576570	89.21	4183	4183	286	81
GCF_000300255.2	REF81MG1495	Free-living	100	55.595	1666795	1666795	89.99	1636	1636	258.5	48
GCF_000300275.1	REF81MG1496	Free-living	100	55.189	4379840	4379840	89.02	4059	4059	284	83
GCF_000300295.3	REF81MG1497	Obligate intracelullar parasite	100	39.727	3184851	3184851	83.93	3188	3188	240	92
GCF_000300335.1	REF81MG1498	Free-living	100	65.512	4466205	4466205	89.86	4206	4206	282	67
GCF_000300455.3	REF81MG1499	Free-living	100	53.744	4902027	4902027	88.91	4569	4569	275	67
GCF_000007605.1	REF81MG15	Obligate intracelullar parasite	100	39.223	1173390	1173390	90.94	989	989	296	48
GCF_000014145.1	REF81MG150	Free-living	100	38.846	4433218	4433218	90.26	3772	3772	273	71
GCF_000300515.1	REF81MG1500	Free-living	100	60.853	4992479	4992479	90.37	4824	4824	272.5	61
GCF_000300695.1	REF81MG1501	Obligate intracelullar parasite	100	27.167	575344	575344	89.68	535	535	210	59
GCF_000300815.1	REF81MG1502	Free-living	100	41.475	3140906	3140906	92.4	2822	2822	284	31
GCF_000300855.1	REF81MG1503	Free-living	100	61.229	5085061	5085061	89.47	4814	4814	281	70
GCF_000300875.1	REF81MG1504	Free-living	100	37.037	3570070	3570070	89.92	3127	3127	277	69
GCF_000300995.1	REF81MG1505	Free-living	100	60.723	3664876	3664876	91.22	3413	3413	274	59
GCF_000301035.1	REF81MG1506	Free-living	100	38.814	1897623	1897623	87.48	1709	1709	276	57
GCF_000301055.1	REF81MG1507	Free-living	100	38.367	1766666	1766666	87.01	1617	1617	280	61
GCF_000301075.1	REF81MG1508	Free-living	100	35.774	2332784	2332784	87.32	2114	2114	261	70
GCF_000302455.1	REF81MG1509	Free-living	100	38.019	2682463	2682463	81.41	2526	2526	242.5	156
GCF_000014185.1	REF81MG151	Free-living	100	70.477	3225748	3225748	92.62	3234	3234	276.5	22
GCF_000302595.1	REF81MG1510	Free-living	100	36.885	4228921	4228921	89.04	3572	3572	290	78
GCF_000302695.1	REF81MG1511	Free-living	100	54.834	4614936	4614936	87.61	4219	4219	270	71
GCF_000304215.1	REF81MG1512	Free-living	100	60.054	2167304	2167304	87.83	1688	1688	317	82
GCF_000304275.1	REF81MG1513	Free-living	100	38.027	4188061	4188061	93.41	3899	3899	286	27
GCF_000304335.1	REF81MG1514	Free-living	100	69.541	3952501	3952501	92	3669	3669	295	51
GCF_000304355.2	REF81MG1515	Free-living	100	60.64	2789774	2789774	83.37	2658	2658	242	60
GCF_000304395.1	REF81MG1516	Free-living	100	62.769	4612407	4612407	88.74	4542	4542	265	71
GCF_000304455.1	REF81MG1517	Obligate intracellular symbiont	100	36.623	887130	887130	85.62	773	773	267	106.5
GCF_000304735.1	REF81MG1518	Free-living	100	28.32	905471	905471	93.83	874	874	268.5	21
GCF_000305495.1	REF81MG1519	Free-living	100	38.825	4583939	4583939	85.94	4669	4669	238	87
GCF_000014225.1	REF81MG152	Free-living	100	44.616	5187005	5187005	87.51	4413	4413	293	91
GCF_000305785.2	REF81MG1520	Free-living	100	55.831	4300227	4300227	91.14	3829	3829	281	50
GCF_000305935.1	REF81MG1521	Free-living	100	53.884	2939057	2939057	84.82	2848	2848	252	61
GCF_000306115.2	REF81MG1522	Free-living	100	45.585	4400835	4400835	90.93	4036	4036	276	51
GCF_000306255.2	REF81MG1523	Free-living	100	35.541	4710917	4710917	79.39	4048	4048	254	75
GCF_000306725.1	REF81MG1524	Free-living	100	44.611	3072769	3072769	86.48	3001	3001	247	74
GCF_000306765.2	REF81MG1525	Free-living	100	61.121	2948884	2948884	87.21	3046	3046	236	88
GCF_000306785.1	REF81MG1526	Free-living	100	74.131	5575517	5575517	90.2	5286	5286	281	56
GCF_000306885.1	REF81MG1527	Obligate intracelullar parasite	100	32.07	957990	957990	70.39	797	797	224	107
GCF_000306965.1	REF81MG1528	Free-living	100	37.216	3836603	3836603	83.65	3570	3570	261	101
GCF_000307105.1	REF81MG1529	Free-living	100	41.449	5197905	5197905	88.85	4564	4564	285	55
GCF_000014245.1	REF81MG153	Free-living	100	61.067	4412446	4412446	89.93	4174	4174	278.5	58
GCF_000307165.1	REF81MG1530	Free-living	100	35.718	2569486	2569486	86.05	2402	2402	264.5	93
GCF_000307245.1	REF81MG1531	Free-living	100	68.287	4381470	4381470	80.9	4149	4149	235	79
GCF_000307265.1	REF81MG1532	Free-living	100	54.451	3105354	3105354	85.92	2893	2893	268	76
GCF_000307305.1	REF81MG1533	Free-living	100	44.794	3801210	3801210	83.08	3376	3376	260	92
GCF_000307375.1	REF81MG1534	Free-living	100	44.978	4629061	4629061	90.09	3742	3742	313	61
GCF_000307855.1	REF81MG1535	Free-living	100	37.237	4222259	4222259	87.88	4247	4247	248	80
GCF_000307875.1	REF81MG1536	Free-living	100	39.606	5369665	5369665	87.35	5209	5209	264	89
GCF_000308195.1	REF81MG1537	Free-living	100	62.92	3908839	3908839	91.22	3546	3546	295	53
GCF_000308215.1	REF81MG1538	Free-living	100	60.479	2620233	2620233	88	2594	2594	250	63
GCF_000308255.2	REF81MG1539	Free-living	100	34.957	2366094	2366094	88.21	2189	2189	261	28
GCF_000014265.1	REF81MG154	Free-living	100	34.143	7750108	7750108	62.63	5427	5427	210	360
GCF_000308275.2	REF81MG1540	Free-living	100	48.727	1713902	1713902	89.72	1479	1479	301	41.5
GCF_000308295.2	REF81MG1541	Free-living	100	60.478	5334146	5334146	86.44	5161	5161	258	85
GCF_000308315.1	REF81MG1542	Free-living	100	39.906	3374751	3374751	85.46	4596	4596	155	61.5
GCF_000308355.2	REF81MG1543	Free-living	100	69.917	6954782	6954782	90.53	6382	6382	274	61
GCF_000308495.1	REF81MG1544	Free-living	100	67.01	6990856	6990856	85.73	6752	6752	246	87
GCF_000308515.1	REF81MG1545	Free-living	100	67.089	7490191	7490191	87.92	6921	6921	273	81
GCF_000308595.1	REF81MG1546	Free-living	100	69.308	6977239	6977239	89.83	6290	6290	283	68
GCF_000308615.1	REF81MG1547	Free-living	100	66.776	10438320	10438320	88.35	9626	9626	274	72
GCF_000308635.1	REF81MG1548	Free-living	100	69.012	7457000	7457000	89.16	6840	6840	273	76
GCF_000308655.1	REF81MG1549	Free-living	100	68.234	8217502	8217502	87.71	7636	7636	264	80
GCF_000014285.1	REF81MG155	Free-living	100	59.072	2708355	2708355	91.46	2430	2430	286	52
GCF_000308675.1	REF81MG1550	Free-living	100	66.603	5994567	5994567	88.07	5369	5369	261	79
GCF_000308695.1	REF81MG1551	Free-living	100	69.543	8020565	8020565	88.5	7161	7161	269	69
GCF_000308715.1	REF81MG1552	Free-living	100	68.424	9725323	9725323	88.47	9115	9115	261	71
GCF_000308755.1	REF81MG1553	Free-living	100	68.109	7576183	7576183	87	6757	6757	264	83
GCF_000308795.1	REF81MG1554	Free-living	100	71.641	6815081	6815081	90.12	6441	6441	263	60.5
GCF_000308835.1	REF81MG1555	Free-living	100	65.47	10138129	10138129	88.49	9334	9334	268	72
GCF_000308855.1	REF81MG1556	Free-living	100	68.243	6776993	6776993	89.4	6080	6080	269	77
GCF_000308875.1	REF81MG1557	Free-living	100	69.22	8378371	8378371	89.4	7790	7790	274	66
GCF_000309075.1	REF81MG1558	Obligate intracelullar parasite	100	29.047	1469252	1469252	87.64	1291	1291	225	95
GCF_000309315.1	REF81MG1559	Free-living	100	35.938	3836408	3836408	89.04	3621	3621	270	71
GCF_000014345.1	REF81MG156	Obligate intracelullar parasite	100	31.054	1159772	1159772	75.49	1063	1063	217	155.5
GCF_000309385.1	REF81MG1560	Free-living	100	57.639	6891283	6891283	83.66	6302	6302	245	122
GCF_000309465.1	REF81MG1561	Obligate intracelullar parasite	100	27.356	618193	618193	91.01	573	573	214	54
GCF_000309485.1	REF81MG1562	Obligate intracelullar parasite	100	27.489	574828	574828	89.97	510	510	231.5	56
GCF_000309885.1	REF81MG1563	Free-living	100	68.553	2072393	2072393	94.88	2148	2148	261	10
GCF_000309945.1	REF81MG1564	Free-living	100	47.472	5530491	5530491	85.98	4970	4970	257	102
GCF_000310145.2	REF81MG1565	Free-living	100	65.913	4305614	4305614	91.72	3835	3835	286	47
GCF_000310185.1	REF81MG1566	Free-living	100	68.652	4278767	4278767	90.57	3807	3807	277	58
GCF_000311725.1	REF81MG1567	Free-living	100	37.032	4967913	4967913	83.84	4884	4884	249	87
GCF_000311745.1	REF81MG1568	Free-living	100	28.881	2037171	2037171	88.17	1993	1993	244	26
GCF_000311765.1	REF81MG1569	Free-living	100	56.247	3602424	3602424	90.66	3313	3313	283	51
GCF_000014385.1	REF81MG157	Free-living	100	37.889	1780517	1780517	88.77	1836	1836	253.5	49
GCF_000311785.1	REF81MG1570	Free-living	100	51.994	5060362	5060362	86.49	5024	5024	262	60.5
GCF_000311825.1	REF81MG1571	Free-living	100	32.751	2101866	2101866	87.19	1983	1983	251	25
GCF_000311845.1	REF81MG1572	Free-living	100	61.497	2280503	2280503	83.8	1905	1905	286	124
GCF_000311865.1	REF81MG1573	Free-living	100	29.702	1773998	1773998	89.15	1668	1668	264	33
GCF_000311925.1	REF81MG1574	Free-living	100	58.012	3163675	3163675	87.12	2602	2602	298	60
GCF_000311985.1	REF81MG1575	Free-living	100	50.833	1770670	1770670	88.75	1559	1559	290	45
GCF_000312005.1	REF81MG1576	Free-living	100	71.229	3410512	3410512	84.81	3097	3097	273	62
GCF_000312025.1	REF81MG1577	Free-living	100	30.12	1758598	1758598	85.33	1873	1873	214	44
GCF_000312045.1	REF81MG1578	Free-living	100	59.726	4188269	4188269	87.24	3849	3849	272	78
GCF_000312105.1	REF81MG1579	Free-living	100	72.493	3322119	3322119	93.05	3289	3289	271	38
GCF_000014425.1	REF81MG158	Free-living	100	35.26	1894360	1894360	91.26	1808	1808	263	53
GCF_000312125.1	REF81MG1580	Free-living	100	60.953	3009940	3009940	87.24	2719	2719	279	93
GCF_000312145.1	REF81MG1581	Free-living	100	57.925	4017609	4017609	90.43	3139	3139	331	45
GCF_000312345.1	REF81MG1582	Free-living	100	65.939	2590418	2590418	88.17	2375	2375	282	40
GCF_000312365.2	REF81MG1583	Free-living	100	33.467	2265938	2265938	90.22	2102	2102	273	23
GCF_000312385.1	REF81MG1584	Free-living	100	70.848	4503402	4503402	92.12	4344	4344	280	36
GCF_000312405.1	REF81MG1585	Free-living	100	50.041	2013830	2013830	86	1906	1906	268.5	68
GCF_000312425.1	REF81MG1586	Free-living	100	64.635	5792259	5792259	92.35	5674	5674	281	29
GCF_000312445.1	REF81MG1587	Free-living	100	47.2	2536876	2536876	89.78	2073	2073	309	44.5
GCF_000312505.2	REF81MG1588	Free-living	100	34.463	1709677	1709677	91.43	1665	1665	255	15
GCF_000312525.1	REF81MG1589	Facultative intracelullar parasite	100	37.257	2043276	2043276	77.84	1794	1794	227	104
GCF_000014445.1	REF81MG159	Free-living	100	37.71	2038396	2038396	90.16	1981	1981	271	54
GCF_000312545.1	REF81MG1590	Facultative intracelullar parasite	100	37.728	1998234	1998234	72.8	1662	1662	230	115
GCF_000312565.1	REF81MG1591	Facultative intracelullar parasite	100	38.795	2158264	2158264	77.16	1866	1866	215	120
GCF_000312665.1	REF81MG1592	Free-living	100	58.817	6461927	6461927	85.85	6313	6313	261	79
GCF_000312705.1	REF81MG1593	Free-living	100	38.122	5149229	5149229	82.72	4702	4702	231.5	125
GCF_000313175.2	REF81MG1594	Free-living	100	41.817	3983611	3983611	85.05	3600	3600	263.5	65
GCF_000313565.1	REF81MG1595	Free-living	100	39.53	3603183	3603183	89.58	3445	3445	265	45
GCF_000313615.1	REF81MG1596	Free-living	100	45.128	2124667	2124667	88.66	2136	2136	242	32
GCF_000313635.1	REF81MG1597	Membrane asociated or intracellular parasite	100	25.892	836897	836897	65.17	1474	1474	90	118
GCF_000313915.1	REF81MG1598	Free-living	100	33.931	1285866	1285866	91.9	1199	1199	270	44
GCF_000314575.1	REF81MG1599	Free-living	100	68.125	3664641	3664641	90.39	3209	3209	304	66
GCF_000007625.1	REF81MG16	Free-living	100	28.749	2799251	2799251	89.09	2701	2701	264	65
GCF_000014465.1	REF81MG160	Free-living	100	46.219	2291220	2291220	87.09	2233	2233	258	88
GCF_000314675.2	REF81MG1600	Free-living	100	61.314	5261968	5261968	87.82	5038	5038	265	83
GCF_000314735.2	REF81MG1601	Free-living	100	60.64	4203290	4203290	88.96	4036	4036	263	68
GCF_000314895.2	REF81MG1602	Free-living	100	34.717	3873423	3873423	76.69	3264	3264	255	95
GCF_000314975.1	REF81MG1603	Free-living	100	40.812	4842140	4842140	90.44	4215	4215	286	57
GCF_000314995.1	REF81MG1604	Free-living	100	40.094	5964456	5964456	88.48	5138	5138	283.5	80
GCF_000315055.1	REF81MG1605	Free-living	100	44.077	5239503	5239503	88.75	4579	4579	282	81
GCF_000315235.1	REF81MG1606	Free-living	100	51.137	3750006	3750006	84.93	3667	3667	223	96
GCF_000315365.1	REF81MG1607	Free-living	100	49.467	2695031	2695031	87.8	2640	2640	255	74
GCF_000315445.1	REF81MG1608	Free-living	100	44.045	1806596	1806596	85.25	1619	1619	273	78
GCF_000315465.1	REF81MG1609	Free-living	100	59.903	2032016	2032016	88.41	1706	1706	302	88
GCF_000014505.1	REF81MG161	Free-living	100	37.358	1832387	1832387	89.9	1751	1751	266	61
GCF_000315485.1	REF81MG1610	Free-living	100	43.383	7087734	7087734	90.98	5519	5519	326	56
GCF_000315505.1	REF81MG1611	Free-living	100	41.101	2324129	2324129	85.09	2127	2127	268	76
GCF_000315525.1	REF81MG1612	Free-living	100	64.014	5532579	5532579	88.93	5048	5048	273	60
GCF_000315565.1	REF81MG1613	Free-living	100	43.517	6465655	6465655	81.49	5757	5757	248	135
GCF_000315795.1	REF81MG1614	Free-living	100	68.792	4950440	4950440	89.51	4516	4516	274	75
GCF_000316115.1	REF81MG1615	Free-living	100	47.618	9422968	9422968	84.41	8487	8487	242	108
GCF_000316515.1	REF81MG1616	Free-living	100	68.707	3342364	3342364	89.71	3354	3354	249	42
GCF_000316575.1	REF81MG1617	Free-living	100	42.247	7023215	7023215	80.6	6123	6123	245	145
GCF_000316605.1	REF81MG1618	Free-living	100	43.867	5125950	5125950	85.91	4715	4715	240	102
GCF_000316625.1	REF81MG1619	Free-living	100	40.358	6329823	6329823	82.77	5460	5460	253	132
GCF_000014565.1	REF81MG162	Free-living	100	67.516	7804765	7804765	90.09	7177	7177	281	53
GCF_000316645.1	REF81MG1620	Free-living	100	41.532	6635030	6635030	83.08	5482	5482	259	138.5
GCF_000316665.1	REF81MG1621	Free-living	100	37.536	8698463	8698463	79.44	6805	6805	272	180
GCF_000316685.1	REF81MG1622	Free-living	100	48.517	3697276	3697276	86.87	3669	3669	236	77
GCF_000317025.1	REF81MG1623	Free-living	100	45.193	4986817	4986817	84.41	4598	4598	253	111
GCF_000317045.1	REF81MG1624	Free-living	100	58.463	4681111	4681111	83.65	3831	3831	281	127
GCF_000317065.1	REF81MG1625	Free-living	100	46.315	4557046	4557046	78.94	3653	3653	268	184
GCF_000317085.1	REF81MG1626	Free-living	100	40.62	3510253	3510253	88.25	3586	3586	230	73
GCF_000317105.1	REF81MG1627	Free-living	100	47.601	7689443	7689443	81	5884	5884	269	167
GCF_000317125.1	REF81MG1628	Free-living	100	44.44	6315792	6315792	84.55	5587	5587	266	116.5
GCF_000317225.1	REF81MG1629	Free-living	100	41.013	5426230	5426230	80.58	4586	4586	259	161
GCF_000014585.1	REF81MG163	Free-living	100	52.447	2606748	2606748	87.89	2865	2865	218	50
GCF_000317285.1	REF81MG1630	Free-living	100	41.479	7746161	7746161	81.62	6761	6761	249	146
GCF_000317305.3	REF81MG1631	Free-living	100	66.885	5421267	5421267	93.17	5088	5088	287	31
GCF_000317435.1	REF81MG1632	Free-living	100	39.796	6767834	6767834	81.13	5622	5622	260.5	156
GCF_000317475.1	REF81MG1633	Free-living	100	45.868	7479014	7479014	80.91	6302	6302	238	161
GCF_000317495.1	REF81MG1634	Free-living	100	40.162	5315554	5315554	84.29	4685	4685	256	135
GCF_000317515.1	REF81MG1635	Free-living	100	46.215	7470429	7470429	83.62	6271	6271	257	139
GCF_000317535.1	REF81MG1636	Free-living	100	42.302	7003560	7003560	82.04	6048	6048	248	135
GCF_000317575.1	REF81MG1637	Free-living	100	35.953	5041209	5041209	83.75	4487	4487	259	129
GCF_000317595.1	REF81MG1638	Free-living	100	70.166	10397115	10397115	87.43	9054	9054	280	100
GCF_000317615.1	REF81MG1639	Free-living	100	42.438	3781008	3781008	83.32	3595	3595	224	100
GCF_000014705.1	REF81MG164	Free-living	100	41.584	4845257	4845257	85.53	4119	4119	277	104
GCF_000317635.1	REF81MG1640	Free-living	100	42.923	4179170	4179170	86.74	3839	3839	258	86
GCF_000317675.1	REF81MG1641	Free-living	100	34.958	4114099	4114099	82.27	3480	3480	261	157
GCF_000317695.1	REF81MG1642	Free-living	100	38.796	6395836	6395836	82.13	5627	5627	244	137
GCF_000317795.1	REF81MG1643	Free-living	100	30.034	1546846	1546846	87.91	1520	1520	263	60
GCF_000317835.1	REF81MG1644	Free-living	100	63.974	3881839	3881839	88.12	3764	3764	259	79
GCF_000317855.1	REF81MG1645	Free-living	100	39.522	2179445	2179445	88.74	2126	2126	257.5	70
GCF_000317975.2	REF81MG1646	Free-living	100	34.526	3650416	3650416	86.05	3467	3467	255	86
GCF_000318135.1	REF81MG1647	Free-living	100	56.832	2809576	2809576	90.87	2579	2579	275	41
GCF_000319245.1	REF81MG1648	Obligate intracellular symbiont	100	32.546	820037	820037	91.54	738	738	281.5	44
GCF_000319365.1	REF81MG1649	Membrane asociated or intracellular parasite	100	35.523	513880	513880	64.1	964	964	85	112
GCF_000014725.1	REF81MG165	Free-living	100	44.866	2936195	2936195	84.86	2640	2640	266	97
GCF_000319385.1	REF81MG1650	Obligate intracellular symbiont	100	34.145	1481191	1481191	57.83	788	788	291.5	486.5
GCF_000319575.2	REF81MG1651	Free-living	100	62.652	1739487	1739487	96.01	1688	1688	282.5	13
GCF_000320365.1	REF81MG1652	Free-living	100	39.728	2079289	2079289	88.29	1823	1823	277	98
GCF_000320405.1	REF81MG1653	Free-living	100	27.716	3553721	3553721	87.33	3389	3389	250	102
GCF_000321025.1	REF81MG1654	Free-living	100	31.6	1846599	1846599	89.01	1722	1722	264.5	27
GCF_000321165.1	REF81MG1655	Free-living	100	65.832	2331554	2331554	88.31	1978	1978	293	95
GCF_000321185.1	REF81MG1656	Free-living	100	34.096	4588940	4588940	82.28	4389	4389	247	128.5
GCF_000321205.1	REF81MG1657	Free-living	100	57.906	2772824	2772824	84.88	2261	2261	294	109
GCF_000321415.2	REF81MG1658	Free-living	100	66.497	4002350	4002350	85.66	3774	3774	246	76
GCF_000325665.1	REF81MG1659	Free-living	100	27.917	2555556	2555556	88.84	2385	2385	273	70
GCF_000014745.1	REF81MG166	Free-living	100	62.728	3368780	3368780	90.63	3129	3129	269	62
GCF_000325705.1	REF81MG1660	Free-living	100	44.754	5608040	5608040	87.1	4615	4615	292	84.5
GCF_000325745.1	REF81MG1661	Free-living	100	35.355	1504659	1504659	85.36	1352	1352	264.5	95
GCF_000327045.1	REF81MG1662	Free-living	100	65.642	4048921	4048921	84.48	3620	3620	257	90
GCF_000327285.1	REF81MG1663	Free-living	100	46.364	3811476	3811476	86.28	3446	3446	273	79
GCF_000327395.1	REF81MG1664	Membrane asociated or intracellular parasite	100	24.082	1011147	1011147	66.02	1624	1624	92	138
GCF_000327485.1	REF81MG1665	Free-living	100	55.196	2820858	2820858	87.47	2873	2873	238	62
GCF_000327505.1	REF81MG1666	Free-living	100	44.129	1437090	1437090	95.03	1528	1528	245	10
GCF_000328305.2	REF81MG1667	Free-living	100	66.657	4347666	4347666	90.59	4175	4175	268	63
GCF_000328565.1	REF81MG1668	Free-living	100	65.073	6464916	6464916	91.78	6391	6391	269	33
GCF_000328625.1	REF81MG1669	Free-living	100	32.456	2649255	2649255	89.37	2544	2544	269	59
GCF_000014765.1	REF81MG167	Free-living	100	48.541	2781824	2781824	87.95	2713	2713	247	61
GCF_000328665.1	REF81MG1670	Free-living	100	42.624	2428904	2428904	87.02	2372	2372	250	66
GCF_000328685.1	REF81MG1671	Free-living	100	64.936	4013216	4013216	85.82	4000	4000	251	88
GCF_000328705.1	REF81MG1672	Free-living	100	72.19	9360653	9360653	88.06	8405	8405	271	69
GCF_000328725.1	REF81MG1673	Membrane asociated or intracellular parasite	100	25.7	998123	998123	66.79	1570	1570	100.5	127
GCF_000328765.2	REF81MG1674	Free-living	100	37.532	2761252	2761252	87.68	2629	2629	274	58
GCF_000328925.1	REF81MG1675	Free-living	100	33.733	3441569	3441569	90.31	4299	4299	189	41
GCF_000328945.1	REF81MG1676	Free-living	100	34.195	1650825	1650825	90.92	1999	1999	198	41
GCF_000330705.1	REF81MG1677	Free-living	100	47.931	2669034	2669034	90.83	2696	2696	270	48
GCF_000330725.2	REF81MG1678	Free-living	100	46.68	4854424	4854424	90.21	4208	4208	281	70
GCF_000330885.1	REF81MG1679	Free-living	100	59.879	3837060	3837060	87.85	3663	3663	269	92
GCF_000014785.1	REF81MG168	Free-living	100	67.531	3275944	3275944	90.56	2895	2895	291	48
GCF_000331005.1	REF81MG1680	Free-living	100	69.87	10820158	10820158	88.93	9625	9625	278	87
GCF_000331025.1	REF81MG1681	Free-living	100	45.142	3703034	3703034	87.84	3233	3233	285	82
GCF_000331105.1	REF81MG1682	Free-living	100	56.461	6775444	6775444	89.44	5614	5614	293	93
GCF_000331225.1	REF81MG1683	Free-living	100	65.48	3131544	3131544	92.89	2913	2913	276	37
GCF_000331245.1	REF81MG1684	Free-living	100	63.6	3616216	3616216	91.11	3344	3344	282	50
GCF_000331285.1	REF81MG1685	Free-living	100	67.348	2898590	2898590	91.41	2758	2758	266	47
GCF_000331305.1	REF81MG1686	Free-living	100	38.535	11584393	11584393	82.51	10188	10188	239	118
GCF_000331515.1	REF81MG1687	Free-living	100	46.236	5536962	5536962	85.67	4850	4850	275	105
GCF_000331535.1	REF81MG1688	Free-living	100	42.379	6725776	6725776	89.21	5649	5649	263	67
GCF_000331575.1	REF81MG1689	Free-living	100	36.098	3575797	3575797	84.71	3374	3374	257	112
GCF_000014825.1	REF81MG169	Free-living	100	64.443	5505494	5505494	85.67	4932	4932	262	106
GCF_000331595.1	REF81MG1690	Obligate intracellular symbiont	100	33.294	1240904	1240904	86.84	1132	1132	246	75
GCF_000331735.1	REF81MG1691	Free-living	100	69.192	10350586	10350586	91.02	8087	8087	309	66
GCF_000331995.1	REF81MG1692	Free-living	100	42.245	2974379	2974379	88.17	2590	2590	300	71
GCF_000332035.1	REF81MG1693	Free-living	100	41.112	4025114	4025114	91.88	3893	3893	243	47
GCF_000332055.1	REF81MG1694	Free-living	100	39.678	5929641	5929641	87.27	5254	5254	252	102
GCF_000332075.2	REF81MG1695	Free-living	100	41.669	4908825	4908825	86.76	4801	4801	238	80
GCF_000332095.2	REF81MG1696	Free-living	100	55.105	5776957	5776957	82.82	5156	5156	251	127
GCF_000332115.1	REF81MG1697	Free-living	100	35.315	3914632	3914632	90.74	3456	3456	265	67
GCF_000332135.1	REF81MG1698	Free-living	100	38.774	5886741	5886741	81.85	5141	5141	248	144
GCF_000332155.1	REF81MG1699	Free-living	100	43.369	6894060	6894060	83.33	5716	5716	251.5	144
GCF_000007705.1	REF81MG17	Free-living	100	64.834	4751080	4751080	89.05	4280	4280	272	67
GCF_000014865.1	REF81MG170	Free-living	100	54.167	4719581	4719581	86.52	3905	3905	273	83
GCF_000332175.1	REF81MG1700	Free-living	100	47.812	5621883	5621883	86.26	5330	5330	237	89
GCF_000332195.1	REF81MG1701	Free-living	100	38.731	7386997	7386997	83.81	6614	6614	250	120
GCF_000332215.1	REF81MG1702	Free-living	100	43.178	5476421	5476421	85.83	4657	4657	250	130
GCF_000332235.1	REF81MG1703	Free-living	100	34.276	4263418	4263418	84.1	4110	4110	225.5	122
GCF_000332255.1	REF81MG1704	Free-living	100	41.847	4903153	4903153	81.49	4318	4318	259	118
GCF_000332275.1	REF81MG1705	Free-living	100	53.707	5066637	5066637	84.33	4543	4543	242	104
GCF_000332295.1	REF81MG1706	Free-living	100	42.202	5742264	5742264	82.94	5168	5168	247	123
GCF_000332315.1	REF81MG1707	Free-living	100	54.193	5646343	5646343	77.22	4592	4592	253	185
GCF_000332335.1	REF81MG1708	Free-living	100	53.945	8594406	8594406	76.12	6873	6873	238	192
GCF_000332515.2	REF81MG1709	Free-living	100	39.152	4081981	4081981	93.19	3825	3825	282	25
GCF_000014885.1	REF81MG171	Free-living	100	43.292	5396476	5396476	84.92	4592	4592	272	100
GCF_000332735.1	REF81MG1710	Free-living	100	32.734	2486042	2486042	87.22	2359	2359	263	80
GCF_000332875.2	REF81MG1711	Free-living	100	37.137	2772228	2772228	91.13	2663	2663	270	40.5
GCF_000332975.1	REF81MG1712	Free-living	100	65.311	5092029	5092029	91.87	4629	4629	293	55
GCF_000332995.1	REF81MG1713	Free-living	100	67.422	4915471	4915471	91.16	4500	4500	286	59
GCF_000333015.1	REF81MG1714	Free-living	100	68.381	3489460	3489460	92.31	3165	3165	289	49
GCF_000333035.1	REF81MG1715	Free-living	100	68.149	4140890	4140890	92.34	3875	3875	280	44
GCF_000333295.1	REF81MG1716	Free-living	100	44.215	5378163	5378163	89.89	5033	5033	223	86
GCF_000333335.1	REF81MG1717	Free-living	100	65.919	4861450	4861450	90.96	5017	5017	226	44
GCF_000333355.1	REF81MG1718	Free-living	100	36.949	4132157	4132157	89.73	3799	3799	234	78
GCF_000333395.1	REF81MG1719	Free-living	100	70.575	3635947	3635947	92.09	3537	3537	260	53
GCF_000014905.1	REF81MG172	Free-living	100	61.902	9965640	9965640	91.32	8192	8192	303	43
GCF_000333435.1	REF81MG1720	Free-living	100	69.828	4202246	4202246	92.7	4407	4407	239	43
GCF_000333455.1	REF81MG1721	Free-living	100	64.96	5508888	5508888	88.32	5251	5251	253	99
GCF_000333615.1	REF81MG1722	Free-living	100	68.706	4930413	4930413	92.18	4598	4598	267	39
GCF_000333895.2	REF81MG1723	Free-living	100	48.703	5555590	5555590	88.42	4933	4933	286	74
GCF_000334155.1	REF81MG1724	Free-living	100	40.768	3850412	3850412	84.42	3746	3746	251	98
GCF_000334215.1	REF81MG1725	Free-living	100	62.923	2847098	2847098	89.59	2535	2535	287	71
GCF_000334405.1	REF81MG1726	Obligate intracellular symbiont	100	28.185	634449	634449	94.16	586	586	293	19.5
GCF_000334455.1	REF81MG1727	Free-living	100	67.656	5375815	5375815	90.43	4938	4938	285	64
GCF_000334895.1	REF81MG1728	Free-living	100	66.028	3474687	3474687	86.78	3446	3446	255	84
GCF_000335475.2	REF81MG1729	Free-living	100	68.623	12282374	12282374	90.3	9996	9996	302	70
GCF_000014925.1	REF81MG173	Free-living	100	62.343	4597686	4597686	91.08	4218	4218	297	58
GCF_000335715.1	REF81MG1730	Free-living	100	61.342	3765366	3765366	89.66	3471	3471	274	67
GCF_000335815.1	REF81MG1731	Free-living	100	64.219	7114674	7114674	92.13	6014	6014	295	47
GCF_000336255.1	REF81MG1732	Free-living	100	52.893	5272860	5272860	87.16	4785	4785	281	67
GCF_000336495.1	REF81MG1733	Free-living	100	47.587	4008085	4008085	91.61	3620	3620	267	52
GCF_000336555.1	REF81MG1734	Free-living	100	61.61	4399548	4399548	88.21	4189	4189	267	83
GCF_000336655.1	REF81MG1735	Free-living	100	65.332	4335372	4335372	86.31	4223	4223	251	98
GCF_000336675.1	REF81MG1736	Free-living	100	65.396	3418708	3418708	85.81	3482	3482	250	76
GCF_000336695.1	REF81MG1737	Free-living	100	63.859	2985120	2985120	88.91	3092	3092	243	64
GCF_000336715.1	REF81MG1738	Free-living	100	61.822	4043393	4043393	87.26	4269	4269	225	71
GCF_000336755.1	REF81MG1739	Free-living	100	61.154	3951883	3951883	87.78	3975	3975	244	81
GCF_000014965.1	REF81MG174	Free-living	100	59.949	4990251	4990251	82.88	4139	4139	284	117
GCF_000336875.1	REF81MG1740	Free-living	100	66.189	3681250	3681250	86.12	3610	3610	244	87
GCF_000336915.1	REF81MG1741	Free-living	100	64.028	3449012	3449012	87.49	3553	3553	248	75.5
GCF_000336935.1	REF81MG1742	Free-living	100	63.449	4194148	4194148	86	4250	4250	239	84
GCF_000336995.1	REF81MG1743	Free-living	100	67.194	3106752	3106752	86.98	3039	3039	258	90
GCF_000337035.1	REF81MG1744	Free-living	100	66.992	3644320	3644320	85.46	3575	3575	247	87
GCF_000337095.1	REF81MG1745	Free-living	100	65.645	4383687	4383687	85.74	4315	4315	258	93
GCF_000337195.1	REF81MG1746	Free-living	100	63.958	4189329	4189329	84.85	4236	4236	241	105
GCF_000337215.1	REF81MG1747	Free-living	100	64.29	4585742	4585742	84.1	4406	4406	251	119
GCF_000337355.1	REF81MG1748	Free-living	100	66.861	3617540	3617540	86.37	3521	3521	255	90
GCF_000337375.1	REF81MG1749	Free-living	100	68.012	3424373	3424373	86.93	3291	3291	260	87
GCF_000015025.1	REF81MG175	Free-living	100	66.907	2443540	2443540	90.12	2190	2190	298	57
GCF_000337415.1	REF81MG1750	Free-living	100	68.038	3325565	3325565	86.3	3304	3304	244	88
GCF_000337455.1	REF81MG1751	Free-living	100	67.674	4693849	4693849	86.42	4548	4548	253	94.5
GCF_000337475.1	REF81MG1752	Free-living	100	61.799	3515800	3515800	84.8	3598	3598	231	105
GCF_000337515.1	REF81MG1753	Free-living	100	64.454	3238452	3238452	85.95	3191	3191	243	107
GCF_000337555.1	REF81MG1754	Free-living	100	62.388	4403302	4403302	84.91	4287	4287	254	108
GCF_000337575.1	REF81MG1755	Free-living	100	61.727	4158249	4158249	85.55	3954	3954	264	114.5
GCF_000337675.1	REF81MG1756	Free-living	100	64.361	4415704	4415704	85.08	4421	4421	243	93
GCF_000337695.1	REF81MG1757	Free-living	100	64.413	4490563	4490563	84.5	4524	4524	232	93
GCF_000337715.1	REF81MG1758	Free-living	100	60.389	4110931	4110931	85.83	4139	4139	241	99
GCF_000337735.1	REF81MG1759	Free-living	100	61.795	3455416	3455416	86.33	3481	3481	242	95
GCF_000015045.1	REF81MG176	Free-living	100	59.024	4008000	4008000	88.5	3565	3565	280	75
GCF_000337775.1	REF81MG1760	Free-living	100	61.798	3923205	3923205	88.75	4029	4029	242	68
GCF_000337815.1	REF81MG1761	Free-living	100	61.848	3368982	3368982	86.35	3436	3436	241	93
GCF_000337895.1	REF81MG1762	Free-living	100	63.741	3682885	3682885	85.52	3582	3582	244	113
GCF_000338055.1	REF81MG1763	Free-living	100	70.038	3257013	3257013	90.78	2919	2919	292	59
GCF_000340375.1	REF81MG1764	Free-living	100	32.613	1945158	1945158	88.82	1863	1863	255	41
GCF_000340435.2	REF81MG1765	Free-living	100	63.948	4235765	4235765	89.12	4005	4005	268	59
GCF_000340565.2	REF81MG1766	Free-living	100	41.192	5462271	5462271	80.99	4746	4746	249	144
GCF_000340795.1	REF81MG1767	Obligate intracellular symbiont	100	30.174	833125	833125	91.63	741	741	288	44
GCF_000340825.1	REF81MG1768	Obligate intracellular symbiont	100	30.963	821930	821930	91.88	731	731	288	43
GCF_000340865.1	REF81MG1769	Obligate intracellular symbiont	100	31.23	810172	810172	89.67	708	708	286	47
GCF_000015105.1	REF81MG177	Obligate intracellular symbiont	100	34.033	1160782	1160782	82.11	1127	1127	234	38
GCF_000340885.1	REF81MG1770	Free-living	100	29.541	6530257	6530257	83.66	5736	5736	274	128
GCF_000340905.1	REF81MG1771	Obligate intracellular symbiont	100	32.359	822140	822140	91.71	734	734	288	46
GCF_000340965.1	REF81MG1772	Free-living	100	69.596	5311456	5311456	86.27	4627	4627	280	102
GCF_000341005.1	REF81MG1773	Free-living	100	67.471	5206986	5206986	86.49	4650	4650	276	102
GCF_000341025.1	REF81MG1774	Free-living	100	70.373	5802198	5802198	86.67	5265	5265	272	94
GCF_000341065.1	REF81MG1775	Free-living	100	71.392	6253755	6253755	85.98	5536	5536	268	112
GCF_000341085.1	REF81MG1776	Free-living	100	70.971	7352075	7352075	86.28	6392	6392	286	107
GCF_000341105.1	REF81MG1777	Free-living	100	74.843	6909139	6909139	84.84	5878	5878	279	116
GCF_000341125.1	REF81MG1778	Free-living	100	71.219	6299935	6299935	87.97	5881	5881	246	95
GCF_000341145.1	REF81MG1779	Free-living	100	69.747	5328861	5328861	86.61	4670	4670	280	103
GCF_000015125.1	REF81MG178	Free-living	100	48.351	3133902	3133902	86.26	2881	2881	252	71
GCF_000341165.1	REF81MG1780	Free-living	100	69.682	6028254	6028254	85.49	5519	5519	255	115
GCF_000341185.1	REF81MG1781	Free-living	100	73.759	6898788	6898788	85.33	6094	6094	267	103
GCF_000341205.1	REF81MG1782	Free-living	100	73.63	6404110	6404110	85.65	5589	5589	277	101
GCF_000341345.1	REF81MG1783	Free-living	100	68.445	3135752	3135752	88.64	2826	2826	290	73
GCF_000341355.1	REF81MG1784	Facultative intracelullar parasite	100	41.84	1596490	1596490	81.39	1364	1364	259.5	109
GCF_000341385.1	REF81MG1785	Facultative intracelullar parasite	100	38.831	1802699	1802699	81.03	1643	1643	238	105
GCF_000341395.1	REF81MG1786	Free-living	100	45.387	3986761	3986761	90.16	3509	3509	293	57
GCF_000341545.2	REF81MG1787	Free-living	100	56.019	3077713	3077713	88.52	2924	2924	261.5	55
GCF_000341735.1	REF81MG1788	Free-living	100	48.682	5067278	5067278	82.97	4428	4428	252	86
GCF_000341795.1	REF81MG1789	Free-living	100	69.007	5822882	5822882	90.97	5342	5342	284.5	59
GCF_000015145.1	REF81MG179	Free-living	100	53.737	1667163	1667163	85.71	1817	1817	223	75
GCF_000341895.1	REF81MG1790	Free-living	100	49.927	3646098	3646098	89.58	3322	3322	278	66
GCF_000342045.1	REF81MG1791	Free-living	100	65.994	4859560	4859560	91.04	4505	4505	262	39
GCF_000342125.1	REF81MG1792	Free-living	100	73.27	7477811	7477811	87.39	6408	6408	284	102
GCF_000342165.1	REF81MG1793	Free-living	100	64.225	3253933	3253933	91.52	2986	2986	280	47
GCF_000344135.1	REF81MG1794	Free-living	100	66.4	4465464	4465464	92.62	4244	4244	275	40
GCF_000344155.1	REF81MG1795	Free-living	100	68.926	4632332	4632332	90.65	4171	4171	287	65
GCF_000344275.1	REF81MG1796	Free-living	100	40.332	2184255	2184255	91.13	2136	2136	250	43
GCF_000344615.1	REF81MG1797	Free-living	100	65.5	6265216	6265216	87.92	5330	5330	290	85
GCF_000344785.1	REF81MG1798	Free-living	100	52.391	2839551	2839551	89.23	2603	2603	274	65
GCF_000344805.1	REF81MG1799	Free-living	100	65.126	8264165	8264165	86.25	7157	7157	283	100.5
GCF_000007725.1	REF81MG18	Obligate intracellular symbiont	100	25.341	615980	615980	83.03	521	521	274	105
GCF_000015205.1	REF81MG180	Free-living	100	49.599	1826402	1826402	89.58	2159	2159	212	29
GCF_000346295.1	REF81MG1800	Free-living	100	54.677	8874084	8874084	87.63	7297	7297	264	109
GCF_000346505.1	REF81MG1801	Free-living	100	56.662	8186686	8186686	87.19	6221	6221	310	118
GCF_000346595.1	REF81MG1802	Free-living	100	36.572	1268237	1268237	80.46	1128	1128	246	116.5
GCF_000346615.1	REF81MG1803	Free-living	100	45.674	4801728	4801728	87.27	4115	4115	276	96
GCF_000347175.1	REF81MG1804	Free-living	100	42.478	4436408	4436408	87.46	4028	4028	258.5	61
GCF_000347595.1	REF81MG1805	Free-living	100	41.045	2407846	2407846	90.67	2170	2170	278	67
GCF_000347635.1	REF81MG1806	Free-living	100	40.365	5413691	5413691	83.22	5082	5082	240	91
GCF_000347695.1	REF81MG1807	Free-living	100	60.111	2291643	2291643	83.99	1734	1734	320	144
GCF_000347775.1	REF81MG1808	Free-living	100	58.329	4033468	4033468	91.84	3692	3692	290	46
GCF_000348685.1	REF81MG1809	Free-living	100	35.371	3053811	3053811	91.04	2800	2800	272	64
GCF_000015225.1	REF81MG181	Free-living	100	57.666	1781889	1781889	91.53	1870	1870	256	41
GCF_000348725.1	REF81MG1810	Free-living	100	41.915	2657893	2657893	92.81	2616	2616	274.5	32
GCF_000348785.1	REF81MG1811	Free-living	100	67.292	4830181	4830181	92.54	4242	4242	294	54
GCF_000348805.1	REF81MG1812	Obligate intracellular symbiont	100	26.408	632490	632490	95.36	581	581	297	17
GCF_000348905.1	REF81MG1813	Free-living	100	54.834	3207463	3207463	89.07	3169	3169	264	72
GCF_000348925.1	REF81MG1814	Free-living	100	54.597	4759956	4759956	88.64	4228	4228	260	89
GCF_000348945.1	REF81MG1815	Free-living	100	62.995	4319900	4319900	86.9	4017	4017	274	89
GCF_000349205.1	REF81MG1816	Free-living	100	49.668	2632500	2632500	92.73	2593	2593	257	28
GCF_000349325.1	REF81MG1817	Free-living	100	70.576	9466619	9466619	90.17	8483	8483	287	66
GCF_000349545.1	REF81MG1818	Free-living	100	70.339	3317267	3317267	90.35	2958	2958	303	67
GCF_000349565.1	REF81MG1819	Free-living	100	70.654	3705324	3705324	89.9	3484	3484	283	64
GCF_000015245.1	REF81MG182	Free-living	100	53.586	4306142	4306142	89.31	3709	3709	286	81
GCF_000349585.1	REF81MG1820	Free-living	100	69.279	3922755	3922755	90.66	3633	3633	280	55
GCF_000349725.1	REF81MG1821	Free-living	100	37.625	2348709	2348709	82.37	2127	2127	262	119
GCF_000349845.1	REF81MG1822	Free-living	100	65.239	5696307	5696307	88.34	5053	5053	287	89
GCF_000349945.1	REF81MG1823	Free-living	100	65.101	5081166	5081166	91.86	4515	4515	295	41
GCF_000349975.1	REF81MG1824	Free-living	100	38.343	2240130	2240130	91.62	2325	2325	244	25
GCF_000350105.1	REF81MG1825	Free-living	100	33.709	3242782	3242782	60.55	2216	2216	228	356
GCF_000350145.1	REF81MG1826	Free-living	100	66.99	4269910	4269910	94.06	4026	4026	283	37
GCF_000350165.1	REF81MG1827	Free-living	100	32.269	2873865	2873865	90.98	2636	2636	295	60
GCF_000350305.1	REF81MG1828	Free-living	100	58.303	1461105	1461105	92.14	1504	1504	251.5	34
GCF_000350485.1	REF81MG1829	Free-living	100	41.201	6415858	6415858	88.09	5333	5333	297	92
GCF_000015265.1	REF81MG183	Free-living	100	71.44	5293685	5293685	91.5	5072	5072	280	39
GCF_000350525.1	REF81MG1830	Free-living	100	64.495	3185418	3185418	91.03	2853	2853	300	64
GCF_000353285.1	REF81MG1831	Free-living	100	47.007	7262454	7262454	87.35	6792	6792	248	84
GCF_000353565.1	REF81MG1832	Free-living	100	51.996	5155092	5155092	87.4	5003	5003	267	87
GCF_000354175.2	REF81MG1833	Free-living	100	44.679	5146637	5146637	87.21	4562	4562	279	94
GCF_000355675.1	REF81MG1834	Free-living	100	46.626	3920328	3920328	90.65	3580	3580	274	59
GCF_000355765.1	REF81MG1835	Free-living	100	53.581	3107181	3107181	86.86	2892	2892	250	83
GCF_000355905.1	REF81MG1836	Free-living	100	35.75	3310706	3310706	89.1	2973	2973	266	53.5
GCF_000359605.1	REF81MG1837	Free-living	100	37.916	3034425	3034425	88.55	3130	3130	245.5	71
GCF_000364165.1	REF81MG1838	Free-living	100	30.786	2912727	2912727	86.43	2786	2786	248	66
GCF_000364225.1	REF81MG1839	Free-living	100	40.204	6508819	6508819	82.13	6218	6218	238	55
GCF_000015285.1	REF81MG184	Free-living	100	40.086	4559598	4559598	80.28	3824	3824	265	128
GCF_000364425.1	REF81MG1840	Obligate intracelullar parasite	100	24.35	562473	562473	76.07	478	478	213.5	108
GCF_000364605.1	REF81MG1841	Free-living	100	69.986	4434130	4434130	92.26	4143	4143	291	49
GCF_000364625.1	REF81MG1842	Free-living	100	66.784	3752096	3752096	90.51	3480	3480	280	66
GCF_000364845.1	REF81MG1843	Free-living	100	58.528	5358909	5358909	87.95	4811	4811	283	86
GCF_000364865.1	REF81MG1844	Free-living	100	60.743	2214851	2214851	85.06	1816	1816	296.5	88
GCF_000365025.1	REF81MG1845	Free-living	100	52.467	2769471	2769471	91.52	2632	2632	270	44
GCF_000367205.1	REF81MG1846	Free-living	100	63.482	2526138	2526138	90.46	2298	2298	290	60
GCF_000367345.1	REF81MG1847	Free-living	100	62.924	4486420	4486420	91.09	4277	4277	261	55
GCF_000367445.1	REF81MG1848	Membrane asociated or intracellular parasite	100	25.567	771940	771940	69.25	1235	1235	107	118
GCF_000367525.1	REF81MG1849	Free-living	100	68.615	3174691	3174691	90.08	3021	3021	272	43
GCF_000015305.1	REF81MG185	Free-living	100	67.793	6491865	6491865	92.03	6158	6158	282	35
GCF_000367765.1	REF81MG1850	Membrane asociated or intracellular parasite	100	27.235	767867	767867	69.79	1279	1279	104	113
GCF_000367805.1	REF81MG1851	Membrane asociated or intracellular parasite	100	28.968	862312	862312	72.6	1463	1463	103	100.5
GCF_000367925.1	REF81MG1852	Free-living	100	39.487	3657694	3657694	85.15	3314	3314	261	99
GCF_000368025.1	REF81MG1853	Free-living	100	41.067	2912642	2912642	85.56	2765	2765	247	81
GCF_000368565.1	REF81MG1854	Free-living	100	37.123	4595172	4595172	84.09	4221	4221	258	101
GCF_000368625.1	REF81MG1855	Free-living	100	41.751	3394558	3394558	85.44	3187	3187	254	91
GCF_000368825.1	REF81MG1856	Free-living	100	39.508	3535739	3535739	86.42	3270	3270	263	81
GCF_000368865.1	REF81MG1857	Free-living	100	44.756	3388822	3388822	85.43	3100	3100	262	102
GCF_000368905.1	REF81MG1858	Free-living	100	41.377	3195486	3195486	86.25	2947	2947	267	84
GCF_000368925.1	REF81MG1859	Free-living	100	37.554	5026532	5026532	83.45	4634	4634	250	99
GCF_000015345.1	REF81MG186	Free-living	100	44.396	1389350	1389350	92.5	1280	1280	276	30
GCF_000369005.1	REF81MG1860	Free-living	100	38.195	3563334	3563334	88.01	3311	3311	266	81
GCF_000369105.1	REF81MG1861	Free-living	100	42.88	3218415	3218415	85.56	3006	3006	258	94
GCF_000371425.1	REF81MG1862	Free-living	100	43.081	4803668	4803668	84.72	4661	4661	249	65
GCF_000371465.1	REF81MG1863	Free-living	100	25.721	3505620	3505620	83.73	3285	3285	253	89
GCF_000371705.1	REF81MG1864	Free-living	100	49.484	6377378	6377378	89.34	5737	5737	296	60
GCF_000371785.1	REF81MG1865	Free-living	100	68.015	5353291	5353291	84.78	4872	4872	269.5	114
GCF_000371805.1	REF81MG1866	Free-living	100	29.498	1249385	1249385	95.17	1372	1372	253	7
GCF_000371925.1	REF81MG1867	Free-living	100	45.089	3923954	3923954	91.45	3720	3720	269	44
GCF_000372005.1	REF81MG1868	Free-living	100	58.881	6329361	6329361	90.29	5825	5825	280	56
GCF_000372065.1	REF81MG1869	Free-living	100	46.4	2311610	2311610	90.85	2108	2108	278.5	59.5
GCF_000015405.1	REF81MG187	Free-living	100	68.438	5737227	5737227	92.7	5513	5513	283	29
GCF_000372085.1	REF81MG1870	Free-living	100	64.53	1960866	1960866	93.37	1847	1847	290	25
GCF_000372385.1	REF81MG1871	Free-living	100	62.07	2545566	2545566	89.1	2204	2204	295	74
GCF_000372405.1	REF81MG1872	Free-living	100	47.054	2356678	2356678	90.92	1951	1951	304	29.5
GCF_000372425.1	REF81MG1873	Free-living	100	42.74	1847340	1847340	90.84	1815	1815	259	52.5
GCF_000372445.1	REF81MG1874	Free-living	100	59.232	2300451	2300451	92.16	2102	2102	289.5	44
GCF_000372465.1	REF81MG1875	Free-living	100	67.504	9627810	9627810	89.84	8877	8877	276	54
GCF_000372745.1	REF81MG1876	Free-living	100	70.922	11392659	11392659	85.55	9966	9966	278.5	114
GCF_000372825.1	REF81MG1877	Free-living	100	66.675	4664957	4664957	86.33	4252	4252	268	99
GCF_000372845.1	REF81MG1878	Free-living	100	62.496	3912050	3912050	86.52	3855	3855	242	80
GCF_000372865.1	REF81MG1879	Free-living	100	54.063	4978464	4978464	86.48	4373	4373	261	77
GCF_000015445.1	REF81MG188	Facultative intracelullar parasite	100	38.239	1445021	1445021	82.27	1233	1233	264	118
GCF_000372885.1	REF81MG1880	Free-living	100	65.601	4161309	4161309	91.2	3738	3738	279	45
GCF_000372965.1	REF81MG1881	Free-living	100	63.371	6112094	6112094	88.84	5845	5845	276	74
GCF_000373005.1	REF81MG1882	Free-living	100	63.111	6387382	6387382	88.24	5771	5771	291	80.5
GCF_000373045.1	REF81MG1883	Free-living	100	29.497	2144606	2144606	85.52	1953	1953	258	90
GCF_000373185.1	REF81MG1884	Free-living	100	37.293	3455832	3455832	89.38	2739	2739	308	51
GCF_000373205.1	REF81MG1885	Free-living	100	65.304	3190628	3190628	91.2	3098	3098	278	52
GCF_000373245.1	REF81MG1886	Free-living	100	43.748	5442202	5442202	86.85	4149	4149	317	91
GCF_000373265.1	REF81MG1887	Free-living	100	52.645	4581480	4581480	86.98	3992	3992	271	101
GCF_000373345.1	REF81MG1888	Free-living	100	29.236	2316529	2316529	86.84	2087	2087	260	93
GCF_000373365.1	REF81MG1889	Free-living	100	72.356	7891711	7891711	85.78	6624	6624	282	96
GCF_000015505.1	REF81MG189	Free-living	100	62.525	4410291	4410291	90.12	4099	4099	282	59
GCF_000373385.1	REF81MG1890	Free-living	100	62.299	3201518	3201518	91.93	3119	3119	259	33
GCF_000373485.1	REF81MG1891	Free-living	100	47.432	4104988	4104988	88.42	3653	3653	282	78.5
GCF_000373545.1	REF81MG1892	Free-living	100	60.235	3358314	3358314	92.6	2835	2835	323	44
GCF_000373565.1	REF81MG1893	Free-living	100	71.129	9161949	9161949	89.39	8274	8274	290	80
GCF_000373665.1	REF81MG1894	Free-living	100	72.29	8646873	8646873	86.64	7910	7910	267	88
GCF_000373745.1	REF81MG1895	Free-living	100	44.617	2668297	2668297	90.64	2506	2506	269	58
GCF_000373765.1	REF81MG1896	Free-living	100	41.629	3512682	3512682	86.56	2942	2942	284	100
GCF_000373805.1	REF81MG1897	Free-living	100	60.71	2531632	2531632	92.27	2361	2361	287	39
GCF_000373885.1	REF81MG1898	Free-living	100	45.683	6085687	6085687	89.52	5558	5558	283	58.5
GCF_000373905.1	REF81MG1899	Free-living	100	65.624	4609894	4609894	90.46	4308	4308	275	50
GCF_000007745.1	REF81MG19	Free-living	100	42.538	2314078	2314078	89.17	2116	2116	281.5	80
GCF_000015565.1	REF81MG190	Free-living	100	65.279	5566749	5566749	88.87	4889	4889	304	50
GCF_000373925.1	REF81MG1900	Free-living	100	67.912	7983713	7983713	87.41	7345	7345	276	79
GCF_000373965.1	REF81MG1901	Free-living	100	56.566	5021710	5021710	89.35	4635	4635	274	62
GCF_000373985.1	REF81MG1902	Free-living	100	46.848	5644283	5644283	89.77	4825	4825	280	55
GCF_000374005.1	REF81MG1903	Free-living	100	51.394	4438944	4438944	88.72	4135	4135	277	87
GCF_000374025.1	REF81MG1904	Free-living	100	48.843	8129284	8129284	89.42	6755	6755	293	89
GCF_000374045.1	REF81MG1905	Free-living	100	37.409	6107890	6107890	85.23	5082	5082	277.5	120
GCF_000374065.1	REF81MG1906	Free-living	100	50.691	6613584	6613584	88.5	5697	5697	279	88
GCF_000374125.1	REF81MG1907	Free-living	100	48.623	5927438	5927438	88.44	4872	4872	298.5	86
GCF_000374145.1	REF81MG1908	Free-living	100	67.189	3409949	3409949	90.05	3021	3021	295	68
GCF_000374165.1	REF81MG1909	Free-living	100	71.67	7589313	7589313	85.71	6158	6158	291	102
GCF_000015585.1	REF81MG191	Free-living	100	67.982	2678452	2678452	92.51	2459	2459	288	37
GCF_000374305.1	REF81MG1910	Free-living	100	73.305	6167782	6167782	89.21	5638	5638	282	59
GCF_000374325.1	REF81MG1911	Free-living	100	37.579	1441290	1441290	90.36	1391	1391	262	45.5
GCF_000374345.1	REF81MG1912	Free-living	100	44.278	3318479	3318479	85.41	3212	3212	255	98
GCF_000374405.1	REF81MG1913	Free-living	100	35.989	2436793	2436793	92.03	2373	2373	248	40
GCF_000374445.1	REF81MG1914	Free-living	100	70.832	8119858	8119858	89.03	7249	7249	270	65
GCF_000374465.1	REF81MG1915	Free-living	100	48.026	3364770	3364770	90.92	3217	3217	284	54
GCF_000374485.1	REF81MG1916	Free-living	100	42.783	4341282	4341282	89.84	3966	3966	259	61
GCF_000374525.1	REF81MG1917	Free-living	100	67.193	4317545	4317545	89.02	3882	3882	288	80
GCF_000374565.1	REF81MG1918	Free-living	100	41.197	4509444	4509444	83.55	4313	4313	260	93
GCF_000374585.1	REF81MG1919	Free-living	100	46.833	3619906	3619906	90	3031	3031	300	70
GCF_000015645.1	REF81MG192	Free-living	100	31.322	1669886	1669886	91.19	1889	1889	223	38
GCF_000374625.1	REF81MG1920	Free-living	100	63.546	2503561	2503561	91.85	2346	2346	274	53
GCF_000374645.1	REF81MG1921	Free-living	100	69.331	3957769	3957769	90.76	3515	3515	290	46
GCF_000374805.1	REF81MG1922	Free-living	100	66.392	4151628	4151628	86.81	3622	3622	278	91
GCF_000374825.1	REF81MG1923	Free-living	100	49.307	4804136	4804136	88.08	4376	4376	287	81
GCF_000374845.1	REF81MG1924	Free-living	100	46.079	6361561	6361561	87.95	5786	5786	278	85
GCF_000375365.1	REF81MG1925	Free-living	100	68.996	2370005	2370005	90.23	2216	2216	273.5	41
GCF_000375405.1	REF81MG1926	Free-living	100	37.992	2634691	2634691	91.24	2224	2224	298	53.5
GCF_000375485.1	REF81MG1927	Free-living	100	59.118	3324581	3324581	90.95	3074	3074	276	46
GCF_000375545.1	REF81MG1928	Free-living	100	57.51	4082245	4082245	91.55	3712	3712	286	58
GCF_000375645.1	REF81MG1929	Free-living	100	56.325	2023236	2023236	91.56	1600	1600	320	34
GCF_000015665.1	REF81MG193	Free-living	100	30.794	1704176	1704176	89.02	1898	1898	223	43
GCF_000375725.1	REF81MG1930	Free-living	100	71.898	7564593	7564593	90.31	6654	6654	291	71
GCF_000376105.1	REF81MG1931	Free-living	100	58.415	4987073	4987073	88.34	4504	4504	266	82
GCF_000376125.1	REF81MG1932	Free-living	100	62.417	5643744	5643744	89.71	5142	5142	294	62
GCF_000376225.1	REF81MG1933	Free-living	100	54.817	3363524	3363524	88.27	3410	3410	253	71
GCF_000376245.1	REF81MG1934	Free-living	100	62.281	2419519	2419519	90.93	2262	2262	273	56
GCF_000376265.1	REF81MG1935	Free-living	100	68.795	2225983	2225983	96.19	2253	2253	269	10
GCF_000376385.1	REF81MG1936	Free-living	100	55.178	2821579	2821579	88.5	2723	2723	262	67
GCF_000376425.1	REF81MG1937	Free-living	100	62.699	3609948	3609948	91.03	3522	3522	250	37
GCF_000376445.1	REF81MG1938	Free-living	100	61.766	4317540	4317540	86.13	4379	4379	247	85
GCF_000376545.2	REF81MG1939	Free-living	100	59.049	3260769	3260769	89.15	3067	3067	274	79
GCF_000015725.1	REF81MG194	Free-living	100	69.198	4044195	4044195	91.94	3845	3845	279	40
GCF_000376565.1	REF81MG1940	Free-living	100	70.259	11828360	11828360	89.46	10725	10725	285	71
GCF_000376585.1	REF81MG1941	Obligate intracellular symbiont	100	34.011	1301823	1301823	87.46	1220	1220	254	75
GCF_000376645.1	REF81MG1942	Free-living	100	41.047	2731870	2731870	89.75	2772	2772	244.5	67
GCF_000376665.1	REF81MG1943	Free-living	100	63.382	3098881	3098881	91.7	3071	3071	269	44
GCF_000376785.1	REF81MG1944	Free-living	100	49.157	6564965	6564965	88.45	6005	6005	263	82
GCF_000376805.1	REF81MG1945	Free-living	100	59.935	3277765	3277765	91.86	3189	3189	269	58
GCF_000376825.1	REF81MG1946	Free-living	100	64.735	3574772	3574772	93.52	3396	3396	293	31
GCF_000376885.1	REF81MG1947	Free-living	100	50.057	1884654	1884654	89.21	1520	1520	313.5	89
GCF_000376945.1	REF81MG1948	Free-living	100	54.547	3785435	3785435	89.63	3461	3461	288	72
GCF_000376965.1	REF81MG1949	Free-living	100	32.801	1686930	1686930	87.53	1675	1675	251	81
GCF_000015745.1	REF81MG195	Free-living	100	49.01	3550319	3550319	85.69	3493	3493	257	82
GCF_000376985.1	REF81MG1950	Free-living	100	38.589	2422509	2422509	87.73	2298	2298	255	83
GCF_000377005.1	REF81MG1951	Free-living	100	41.102	1927889	1927889	90.23	1891	1891	257	59
GCF_000377505.1	REF81MG1952	Free-living	100	48.495	6385800	6385800	85.87	5471	5471	288	123
GCF_000377645.1	REF81MG1953	Free-living	100	69.944	4204671	4204671	90.94	3888	3888	283	47
GCF_000377705.1	REF81MG1954	Free-living	100	43.159	3831781	3831781	82.55	3599	3599	264	118
GCF_000377745.1	REF81MG1955	Free-living	100	51.149	4068866	4068866	90.6	3597	3597	280	52
GCF_000377765.1	REF81MG1956	Free-living	100	36.802	4409254	4409254	86.04	4250	4250	262	78
GCF_000377785.1	REF81MG1957	Free-living	100	67.484	2814898	2814898	92.34	2613	2613	277	35.5
GCF_000377885.1	REF81MG1958	Free-living	100	67.559	2803222	2803222	92.45	2626	2626	275	35
GCF_000377985.1	REF81MG1959	Free-living	100	49.463	2862363	2862363	86.83	2717	2717	266	93
GCF_000015765.1	REF81MG196	Free-living	100	50.007	1804962	1804962	89.25	1809	1809	255	38
GCF_000378005.1	REF81MG1960	Free-living	100	42.167	1424377	1424377	93.65	1413	1413	275	14
GCF_000378025.1	REF81MG1961	Free-living	100	67.367	5108628	5108628	88.94	4598	4598	283	72
GCF_000378045.1	REF81MG1962	Free-living	100	58.473	5364574	5364574	86.54	4739	4739	285	88
GCF_000378085.1	REF81MG1963	Free-living	100	46.566	3508589	3508589	83.03	2813	2813	277	121
GCF_000378105.1	REF81MG1964	Free-living	100	51.556	3013271	3013271	91.11	2651	2651	289	71
GCF_000378125.1	REF81MG1965	Free-living	100	63.647	4343639	4343639	90.76	3688	3688	295	65
GCF_000378145.1	REF81MG1966	Free-living	100	50.68	4699563	4699563	85.37	4042	4042	288	136
GCF_000378165.1	REF81MG1967	Free-living	100	51.128	2384067	2384067	90.61	2204	2204	264.5	50
GCF_000378185.1	REF81MG1968	Free-living	100	46.961	3985437	3985437	88.73	3604	3604	272	66
GCF_000378225.1	REF81MG1969	Free-living	100	49.603	2860219	2860219	90.88	2678	2678	271	50.5
GCF_000015825.1	REF81MG197	Free-living	100	62.063	2478101	2478101	87.56	2476	2476	251	52
GCF_000378245.1	REF81MG1970	Free-living	100	66.007	5925983	5925983	90.41	5394	5394	284	51
GCF_000378345.1	REF81MG1971	Free-living	100	44.622	3351270	3351270	90.34	3054	3054	279	70
GCF_000378385.1	REF81MG1972	Free-living	100	53.219	7464058	7464058	88.85	6438	6438	291	77
GCF_000378405.1	REF81MG1973	Free-living	100	43.724	3964271	3964271	77.26	3122	3122	260	96
GCF_000378425.1	REF81MG1974	Free-living	100	57.221	4476185	4476185	88.05	4089	4089	285	78
GCF_000378465.1	REF81MG1975	Free-living	100	71.272	4304237	4304237	93.19	4070	4070	295	25
GCF_000378485.1	REF81MG1976	Free-living	100	39.6	4489248	4489248	88.72	3966	3966	268	81
GCF_000378505.1	REF81MG1977	Free-living	100	59.048	4533090	4533090	88.01	4258	4258	268	74
GCF_000378625.1	REF81MG1978	Free-living	100	38.845	5484375	5484375	83.69	4493	4493	282	128
GCF_000378725.1	REF81MG1979	Free-living	100	30.217	1849203	1849203	91.32	1728	1728	269	22
GCF_000015865.1	REF81MG198	Free-living	100	38.987	3843301	3843301	85.37	3371	3371	267	103
GCF_000378745.1	REF81MG1980	Free-living	100	36.406	2391937	2391937	89.3	1960	1960	301.5	63
GCF_000378765.1	REF81MG1981	Free-living	100	36.475	3001811	3001811	90.96	2774	2774	272	47
GCF_000378965.1	REF81MG1982	Free-living	100	64.831	3746647	3746647	86.87	3536	3536	257	88
GCF_000379025.1	REF81MG1983	Free-living	100	30.671	3459766	3459766	84.17	3188	3188	260	102
GCF_000379125.1	REF81MG1984	Free-living	100	64.913	4824446	4824446	88.26	4363	4363	269	76
GCF_000379145.1	REF81MG1985	Free-living	100	63.699	9484767	9484767	83.8	8950	8950	261	108
GCF_000379185.1	REF81MG1986	Free-living	100	34.393	2657104	2657104	89.78	2298	2298	277	72
GCF_000379365.1	REF81MG1987	Free-living	100	60.602	2772066	2772066	87.11	2727	2727	248	57
GCF_000379425.1	REF81MG1988	Free-living	100	58.543	2944170	2944170	92.18	2771	2771	278	44
GCF_000379445.1	REF81MG1989	Free-living	100	37.938	2946743	2946743	91.59	2724	2724	277	39
GCF_000015885.1	REF81MG199	Free-living	100	41.3	2274482	2274482	89.66	2124	2124	264	79
GCF_000379465.1	REF81MG1990	Free-living	100	67.769	8536451	8536451	90.09	8097	8097	279	42
GCF_000379485.1	REF81MG1991	Free-living	100	70.539	4175892	4175892	89.89	3992	3992	271	60
GCF_000379525.1	REF81MG1992	Free-living	100	64.286	6908745	6908745	86.59	5984	5984	255	85
GCF_000379605.1	REF81MG1993	Free-living	100	60.659	6810126	6810126	86.67	6477	6477	266	85
GCF_000379625.1	REF81MG1994	Free-living	100	73.979	5861079	5861079	91.11	5652	5652	277	52
GCF_000379645.1	REF81MG1995	Free-living	100	70.936	10988507	10988507	91.62	9976	9976	286	44
GCF_000379665.1	REF81MG1996	Free-living	100	44.835	4770838	4770838	91.88	3861	3861	319	55
GCF_000379685.1	REF81MG1997	Free-living	100	64.364	7688589	7688589	93.07	7486	7486	272	29
GCF_000379705.1	REF81MG1998	Free-living	100	49.694	1843677	1843677	90.81	1630	1630	293	53
GCF_000379725.1	REF81MG1999	Free-living	100	37.052	4425125	4425125	89.09	3881	3881	263	77
GCF_000006175.1	REF81MG2	Free-living	100	28.595	1936387	1936387	80.46	1723	1723	257	168
GCF_000007865.1	REF81MG20	Free-living	100	69.299	4829781	4829781	91.2	4530	4530	282	43
GCF_000015945.1	REF81MG200	Free-living	100	35.727	1570485	1570485	89.14	1651	1651	239	47
GCF_000379765.1	REF81MG2000	Free-living	100	36.339	9536821	9536821	87.3	7303	7303	301	111
GCF_000379825.1	REF81MG2001	Free-living	100	70.285	6821241	6821241	90.29	6328	6328	265	57
GCF_000379845.1	REF81MG2002	Free-living	100	40.07	2427214	2427214	88.56	2281	2281	253	81
GCF_000379865.1	REF81MG2003	Free-living	100	69.373	5082325	5082325	92.21	4813	4813	282	33
GCF_000379885.1	REF81MG2004	Free-living	100	72.221	8996452	8996452	90.87	8384	8384	282	51
GCF_000379905.1	REF81MG2005	Free-living	100	39.755	2257166	2257166	90.4	2061	2061	277	62
GCF_000379925.1	REF81MG2006	Free-living	100	45.651	2516477	2516477	91.98	2151	2151	290	28
GCF_000379945.1	REF81MG2007	Free-living	100	43.595	2214526	2214526	89.64	1847	1847	304	54
GCF_000379965.1	REF81MG2008	Free-living	100	38.333	2650108	2650108	86.58	2061	2061	311	91
GCF_000379985.1	REF81MG2009	Free-living	100	40.326	2122044	2122044	87.48	2062	2062	249	68
GCF_000015965.1	REF81MG201	Free-living	100	31.34	1641879	1641879	91.09	1873	1873	220	37
GCF_000380005.1	REF81MG2010	Free-living	100	35.769	1877438	1877438	89.16	1789	1789	271	73
GCF_000380025.1	REF81MG2011	Free-living	100	44.611	2036468	2036468	88.35	1995	1995	240	51
GCF_000380045.1	REF81MG2012	Free-living	100	33.113	1505444	1505444	89.42	1417	1417	254	54
GCF_000380065.1	REF81MG2013	Free-living	100	41.477	1864153	1864153	91.53	1812	1812	259	47
GCF_000380085.1	REF81MG2014	Free-living	100	41.693	2357340	2357340	84.67	2127	2127	266	80.5
GCF_000380105.1	REF81MG2015	Free-living	100	38.512	2416134	2416134	87.14	2277	2277	250	66.5
GCF_000380125.1	REF81MG2016	Free-living	100	40.099	2358538	2358538	90.24	2351	2351	251	53
GCF_000380165.1	REF81MG2017	Free-living	100	72.035	6429887	6429887	86.81	5431	5431	290	103.5
GCF_000380185.1	REF81MG2018	Free-living	100	44.345	3787626	3787626	90.29	3466	3466	268	59
GCF_000380225.1	REF81MG2019	Free-living	100	46.467	5632035	5632035	83.56	4853	4853	258	131
GCF_000016065.1	REF81MG202	Free-living	100	53.667	4602594	4602594	86.64	3900	3900	282	101
GCF_000380245.2	REF81MG2020	Free-living	100	34.833	5451072	5451072	83.52	5161	5161	257	114
GCF_000380485.1	REF81MG2021	Free-living	100	67.083	4225368	4225368	92.54	3972	3972	279.5	48
GCF_000380505.1	REF81MG2022	Free-living	100	65.896	4766107	4766107	88.97	4412	4412	293	77
GCF_000380565.1	REF81MG2023	Free-living	100	48.838	4835674	4835674	83.67	4354	4354	244	105
GCF_000380645.1	REF81MG2024	Free-living	100	64.345	5320466	5320466	93.05	5121	5121	276	37
GCF_000380965.1	REF81MG2025	Free-living	100	57.064	5675308	5675308	85.04	4983	4983	280	96
GCF_000380985.1	REF81MG2026	Free-living	100	43.138	4776693	4776693	90.31	3822	3822	318	79
GCF_000381005.1	REF81MG2027	Free-living	100	59.049	2688760	2688760	88.27	2444	2444	277	71
GCF_000381025.1	REF81MG2028	Free-living	100	71.668	7104952	7104952	86.33	6144	6144	285	93
GCF_000381065.1	REF81MG2029	Free-living	100	38.095	4134382	4134382	87.13	3802	3802	277	81
GCF_000016085.1	REF81MG203	Free-living	100	52.992	1966858	1966858	92.19	1793	1793	284	45
GCF_000381085.1	REF81MG2030	Free-living	100	41.883	2552883	2552883	87.38	2264	2264	278	92
GCF_000381125.1	REF81MG2031	Free-living	100	65.958	3532116	3532116	93.03	3325	3325	278	30
GCF_000381265.1	REF81MG2032	Free-living	100	65.54	6832523	6832523	90.24	6238	6238	292	53
GCF_000381345.1	REF81MG2033	Free-living	100	68.659	4452642	4452642	87.41	4291	4291	261	73
GCF_000381365.1	REF81MG2034	Free-living	100	41.854	5315450	5315450	89.84	4142	4142	316	72
GCF_000381525.1	REF81MG2035	Free-living	100	35.704	2106935	2106935	89.11	1927	1927	268	62
GCF_000381545.1	REF81MG2036	Free-living	100	41.762	5193701	5193701	87.15	4406	4406	284	80
GCF_000381585.1	REF81MG2037	Free-living	100	59.136	6250814	6250814	87.52	5419	5419	276	84
GCF_000381605.1	REF81MG2038	Free-living	100	57.553	6009926	6009926	88.06	5055	5055	290	87
GCF_000381625.1	REF81MG2039	Free-living	100	57.105	6692160	6692160	89.83	5765	5765	290	61
GCF_000016165.1	REF81MG204	Free-living	100	42.275	3608104	3608104	86.16	3500	3500	254	80
GCF_000381725.1	REF81MG2040	Free-living	100	28.55	1941804	1941804	91.54	1714	1714	281	33
GCF_000381745.1	REF81MG2041	Free-living	100	41.937	5204311	5204311	85.95	4408	4408	284	98
GCF_000381765.1	REF81MG2042	Free-living	100	68.534	2847348	2847348	92.49	2609	2609	304	44
GCF_000381785.1	REF81MG2043	Free-living	100	47.444	3799525	3799525	88.5	3483	3483	275	72
GCF_000381825.1	REF81MG2044	Free-living	100	65.759	2659308	2659308	88.93	2451	2451	268	59
GCF_000381885.1	REF81MG2045	Free-living	100	73.718	6710579	6710579	88.31	6214	6214	276	64
GCF_000381905.1	REF81MG2046	Free-living	100	47.646	6309271	6309271	85.88	5571	5571	284	103
GCF_000381925.1	REF81MG2047	Free-living	100	69.18	9143142	9143142	89.78	8068	8068	283	66
GCF_000381965.1	REF81MG2048	Free-living	100	56.175	3282720	3282720	91.47	3089	3089	278	49
GCF_000381985.1	REF81MG2049	Free-living	100	63.118	4290651	4290651	88.39	3795	3795	286	86
GCF_000016185.1	REF81MG205	Free-living	100	70.461	4355543	4355543	88.25	3921	3921	272	82
GCF_000382005.1	REF81MG2050	Free-living	100	43.176	5277109	5277109	89.21	4612	4612	273	72
GCF_000382085.1	REF81MG2051	Free-living	100	44.831	2664035	2664035	87.15	2319	2319	276	54
GCF_000382125.1	REF81MG2052	Free-living	100	38.216	3906474	3906474	90.6	3486	3486	285	62
GCF_000382145.1	REF81MG2053	Free-living	100	41.407	3176011	3176011	81.78	2564	2564	285.5	168
GCF_000382165.1	REF81MG2054	Free-living	100	48.55	4000424	4000424	91.73	3649	3649	277	54
GCF_000382185.1	REF81MG2055	Free-living	100	63.352	4079718	4079718	90.38	3771	3771	290	53
GCF_000382225.1	REF81MG2056	Free-living	100	62.078	4253037	4253037	85.99	3693	3693	262	137
GCF_000382245.1	REF81MG2057	Free-living	100	62.641	3750691	3750691	89.22	3462	3462	282	71
GCF_000382265.1	REF81MG2058	Free-living	100	61.788	3721596	3721596	92.28	3671	3671	266	39
GCF_000382305.1	REF81MG2059	Free-living	100	43.897	2581302	2581302	89.18	2503	2503	262	68
GCF_000016285.1	REF81MG206	Free-living	100	57.622	5009562	5009562	87.59	4524	4524	286	80
GCF_000382325.1	REF81MG2060	Free-living	100	55.645	3105947	3105947	89.78	2887	2887	263	62
GCF_000382345.1	REF81MG2061	Free-living	100	66.226	6594487	6594487	90.42	5699	5699	299	61
GCF_000382385.1	REF81MG2062	Free-living	100	47.355	3314235	3314235	88.13	2763	2763	295	52
GCF_000382425.1	REF81MG2063	Free-living	100	32.727	3792478	3792478	90.43	3551	3551	263	61
GCF_000382485.1	REF81MG2064	Free-living	100	66.529	3184625	3184625	91.4	3115	3115	261	47
GCF_000382705.1	REF81MG2065	Free-living	100	67.28	5087183	5087183	88.83	4728	4728	282.5	74
GCF_000383095.1	REF81MG2066	Free-living	100	67.36	3910956	3910956	91.77	3674	3674	274.5	45
GCF_000383295.1	REF81MG2067	Free-living	100	53.543	3174421	3174421	85.57	2944	2944	272	90
GCF_000383315.1	REF81MG2068	Free-living	100	69.85	4090615	4090615	92.66	3912	3912	287	46
GCF_000383415.1	REF81MG2069	Free-living	100	63.656	4651795	4651795	86.66	4258	4258	263	94
GCF_000016325.1	REF81MG207	Free-living	100	52.982	4518712	4518712	89.21	4261	4261	274	62
GCF_000383435.1	REF81MG2070	Free-living	100	48.979	2631123	2631123	84.22	2385	2385	260	121
GCF_000383535.1	REF81MG2071	Free-living	100	63.899	5711547	5711547	91.44	5301	5301	288	51
GCF_000383795.1	REF81MG2072	Free-living	100	70.105	4030889	4030889	82.73	3849	3849	253	99
GCF_000383855.1	REF81MG2073	Free-living	100	52.659	4988792	4988792	86.35	4486	4486	259	68
GCF_000383875.1	REF81MG2074	Free-living	100	51.585	3059517	3059517	80.33	2771	2771	255	119
GCF_000383895.1	REF81MG2075	Free-living	100	63.644	6272951	6272951	91.25	5313	5313	302	58
GCF_000383915.1	REF81MG2076	Free-living	100	69.949	8704271	8704271	88.87	7971	7971	278	62
GCF_000383955.1	REF81MG2077	Free-living	100	54.339	6546036	6546036	89.35	5295	5295	298	92.5
GCF_000383975.1	REF81MG2078	Free-living	100	62.248	4934841	4934841	84.16	4738	4738	250	115
GCF_000384035.1	REF81MG2079	Free-living	100	68.762	4233350	4233350	85.89	3876	3876	274	96
GCF_000016345.1	REF81MG208	Free-living	100	44.834	2159490	2159490	93.65	2131	2131	268	31
GCF_000384075.1	REF81MG2080	Free-living	100	50.65	4687143	4687143	87.15	4248	4248	249.5	74
GCF_000384115.1	REF81MG2081	Free-living	100	71.368	5500153	5500153	91.27	5187	5187	281	41
GCF_000384135.1	REF81MG2082	Free-living	100	36.235	2085243	2085243	90.12	1913	1913	285	41
GCF_000384175.1	REF81MG2083	Free-living	100	71.5	7458334	7458334	88.4	6728	6728	282	80
GCF_000384195.1	REF81MG2084	Free-living	100	37.826	2052877	2052877	83.68	1736	1736	283	123
GCF_000384235.1	REF81MG2085	Free-living	100	54.867	2356686	2356686	90.96	2161	2161	280	51
GCF_000384315.1	REF81MG2086	Free-living	100	70.013	9111009	9111009	91.25	8530	8530	284.5	53
GCF_000384335.2	REF81MG2087	Free-living	100	59.537	4108307	4108307	87.5	3923	3923	259	83
GCF_000384355.1	REF81MG2088	Free-living	100	45.611	2747525	2747525	92.14	2591	2591	271	48
GCF_000384375.1	REF81MG2089	Free-living	100	41.914	2604277	2604277	90.45	2408	2408	273	71
GCF_000016405.1	REF81MG209	Free-living	100	68.478	3217726	3217726	90.65	3209	3209	263	52
GCF_000384395.1	REF81MG2090	Free-living	100	53.215	4241730	4241730	89.41	3913	3913	276	62
GCF_000384415.1	REF81MG2091	Free-living	100	41.97	2383924	2383924	92.32	2272	2272	273	31
GCF_000384475.1	REF81MG2092	Free-living	100	67.975	4453493	4453493	87.47	4163	4163	264	86
GCF_000384965.1	REF81MG2093	Facultative intracelullar parasite	100	37.321	1624667	1624667	82.15	1383	1383	263	103
GCF_000385135.1	REF81MG2094	Free-living	100	72.771	6253582	6253582	91.29	5470	5470	302	68
GCF_000385175.1	REF81MG2095	Free-living	100	43.88	2639352	2639352	89.49	2667	2667	264	58
GCF_000385215.1	REF81MG2096	Free-living	100	66.176	2765337	2765337	91.03	2593	2593	268	49
GCF_000385335.1	REF81MG2097	Free-living	100	59.543	4235448	4235448	87.14	3927	3927	257	100
GCF_000385435.1	REF81MG2098	Facultative intracelullar parasite	100	37.83	1619143	1619143	82.6	1392	1392	264	100
GCF_000385565.1	REF81MG2099	Free-living	100	43.239	2076931	2076931	88.57	2239	2239	236	36
GCF_000007905.1	REF81MG21	Free-living	100	35.931	1799146	1799146	93.77	1798	1798	262.5	19
GCF_000016425.1	REF81MG210	Free-living	100	69.461	5183331	5183331	87.87	4661	4661	281	78
GCF_000385925.1	REF81MG2100	Free-living	100	42.067	2142100	2142100	87.35	2109	2109	242	78
GCF_000387765.1	REF81MG2101	Free-living	100	30.096	2770285	2770285	89.55	2665	2665	254	71
GCF_000388115.1	REF81MG2102	Free-living	100	59.177	4236171	4236171	88.02	4082	4082	252.5	89
GCF_000388175.3	REF81MG2103	Free-living	100	36.087	1402636	1402636	83.23	1220	1220	208.5	90
GCF_000389635.1	REF81MG2104	Free-living	100	30.577	4990707	4990707	81.14	4723	4723	246	136
GCF_000389715.1	REF81MG2105	Free-living	100	69.722	4379561	4379561	91.9	4208	4208	274.5	43
GCF_000389965.1	REF81MG2106	Free-living	100	71.311	9228054	9228054	90.06	8012	8012	281	51
GCF_000389985.1	REF81MG2107	Free-living	100	69.786	4219246	4219246	90.94	4092	4092	277	34
GCF_000390185.1	REF81MG2108	Free-living	100	46.808	5392044	5392044	90.56	4423	4423	310	69
GCF_000397065.2	REF81MG2109	Free-living	100	56.728	4020008	4020008	91.94	3636	3636	293	53
GCF_000016505.1	REF81MG211	Free-living	100	32.02	3964618	3964618	85.29	3885	3885	243	85
GCF_000397205.1	REF81MG2110	Free-living	100	63.391	6867980	6867980	89.15	6131	6131	286	80
GCF_000398925.1	REF81MG2111	Free-living	100	53.655	3325721	3325721	87.31	3109	3109	269	59
GCF_000400505.1	REF81MG2112	Free-living	100	54.952	4631867	4631867	85.49	4064	4064	284	89
GCF_000400735.1	REF81MG2113	Free-living	100	39.842	4078922	4078922	86.91	3904	3904	251	77
GCF_000400795.1	REF81MG2114	Free-living	100	56.117	4867258	4867258	85.48	4195	4195	287	96
GCF_000400935.1	REF81MG2115	Obligate intracellular symbiont	100	28.799	1123322	1123322	66.45	1936	1936	94	110
GCF_000400955.1	REF81MG2116	Obligate intracellular symbiont	100	29.201	1107344	1107344	67.08	1930	1930	94	109
GCF_000401215.1	REF81MG2117	Free-living	100	27.911	3970834	3970834	87.58	3977	3977	238	85
GCF_000401255.1	REF81MG2118	Free-living	100	66.757	4879985	4879985	91.34	4232	4232	256.5	76
GCF_000403135.1	REF81MG2119	Free-living	100	38.162	4687695	4687695	89.43	4141	4141	273	62
GCF_000016525.1	REF81MG212	Free-living	100	31.034	1853160	1853160	89.96	1774	1774	251	32
GCF_000403215.1	REF81MG2120	Free-living	100	43.35	6961896	6961896	85.74	6493	6493	251	61
GCF_000403255.1	REF81MG2121	Free-living	100	42.081	5083159	5083159	87.34	5044	5044	245	58
GCF_000403275.1	REF81MG2122	Free-living	100	44.439	4283535	4283535	87.73	4024	4024	270	55
GCF_000403295.1	REF81MG2123	Free-living	100	47.003	5799088	5799088	86.71	5304	5304	271	80
GCF_000403315.2	REF81MG2124	Free-living	100	46.242	5238929	5238929	85.69	5203	5203	240	74
GCF_000403335.2	REF81MG2125	Free-living	100	42.995	4967607	4967607	85.52	4651	4651	244	63
GCF_000403355.2	REF81MG2126	Free-living	100	63.859	2955616	2955616	87.16	2440	2440	289	96
GCF_000403375.2	REF81MG2127	Free-living	100	51.591	4781233	4781233	87.21	4292	4292	291.5	86
GCF_000403395.2	REF81MG2128	Free-living	100	53.066	3620383	3620383	83.32	3401	3401	252	70
GCF_000403415.2	REF81MG2129	Free-living	100	39.62	2407520	2407520	89.01	2252	2252	271	44
GCF_000016545.1	REF81MG213	Free-living	100	35.254	2970275	2970275	88.92	2858	2858	268	45
GCF_000403435.2	REF81MG2130	Free-living	100	57.866	4467686	4467686	85.19	4238	4238	251	72
GCF_000403455.2	REF81MG2131	Free-living	100	44.093	6145811	6145811	85.98	5806	5806	253	58
GCF_000403475.2	REF81MG2132	Free-living	100	44.154	4455623	4455623	88.49	4205	4205	273	52
GCF_000403495.2	REF81MG2133	Free-living	100	40.39	4571652	4571652	89.11	4302	4302	269	49
GCF_000403645.1	REF81MG2134	Free-living	100	66.586	3255260	3255260	86.16	3101	3101	261	107
GCF_000403845.2	REF81MG2135	Free-living	100	44.904	3996868	3996868	87.9	3762	3762	257	58
GCF_000404125.1	REF81MG2136	Free-living	100	44.986	4717274	4717274	74.94	5001	5001	172	67
GCF_000404165.1	REF81MG2137	Free-living	100	29.039	1998189	1998189	77.5	1701	1701	253	201
GCF_000404225.1	REF81MG2138	Free-living	100	41.255	1931651	1931651	88.73	1852	1852	257	46
GCF_000406925.1	REF81MG2139	Free-living	100	36.152	2583038	2583038	85.46	2327	2327	266	79
GCF_000016565.1	REF81MG214	Free-living	100	64.676	5072807	5072807	89.72	4629	4629	281	73
GCF_000406945.1	REF81MG2140	Free-living	100	36.934	2822228	2822228	86.09	2631	2631	263	88
GCF_000407165.1	REF81MG2141	Free-living	100	35.703	3581919	3581919	86.5	3207	3207	266	87
GCF_000407245.1	REF81MG2142	Free-living	100	38.963	4614282	4614282	86.95	4503	4503	259	70
GCF_000407285.1	REF81MG2143	Free-living	100	36.704	2604038	2604038	88.68	2586	2586	262	65
GCF_000407365.1	REF81MG2144	Free-living	100	44.716	2572706	2572706	88.69	2429	2429	271	71
GCF_000407485.1	REF81MG2145	Free-living	100	40.048	5437454	5437454	88.04	5196	5196	260	57
GCF_000407505.1	REF81MG2146	Free-living	100	36.392	3910972	3910972	85.74	3507	3507	278	85
GCF_000407545.1	REF81MG2147	Free-living	100	41.419	4179913	4179913	87.64	4111	4111	251	66
GCF_000407605.1	REF81MG2148	Free-living	100	37.911	2301651	2301651	91.3	2175	2175	274	46
GCF_000409565.1	REF81MG2149	Free-living	100	51.44	3745960	3745960	88.32	3335	3335	268	95
GCF_000016605.1	REF81MG215	Free-living	100	46.225	2191517	2191517	89.69	2384	2384	233	33
GCF_000409775.1	REF81MG2150	Free-living	100	58.506	5070590	5070590	90.1	4728	4728	283	65
GCF_000410635.1	REF81MG2151	Free-living	100	63.28	5236981	5236981	87.87	4741	4741	277	79
GCF_000410875.1	REF81MG2152	Free-living	100	57.406	4642307	4642307	90.9	4239	4239	280	55
GCF_000411115.1	REF81MG2153	Free-living	100	41.379	2746278	2746278	89.4	2501	2501	256	60
GCF_000411155.1	REF81MG2154	Free-living	100	56.62	1906711	1906711	91.23	1664	1664	304	61
GCF_000411295.1	REF81MG2155	Free-living	100	38.93	3522309	3522309	83.84	3452	3452	240	95
GCF_000411355.1	REF81MG2156	Free-living	100	41.712	2792342	2792342	89.48	2598	2598	281.5	60
GCF_000411375.1	REF81MG2157	Free-living	100	60.783	2722973	2722973	87.11	2444	2444	276	64
GCF_000411515.1	REF81MG2158	Free-living	100	54.23	2988328	2988328	85.62	2408	2408	304	102
GCF_000411555.1	REF81MG2159	Free-living	100	51.647	1665560	1665560	89.86	1474	1474	289.5	67
GCF_000016645.1	REF81MG216	Free-living	100	34.113	6096872	6096872	88.5	5191	5191	272	90
GCF_000412185.1	REF81MG2160	Free-living	100	63.936	3323095	3323095	91.97	3192	3192	265	43
GCF_000412695.1	REF81MG2161	Free-living	100	65.555	6285863	6285863	88.45	5582	5582	288	83
GCF_000412995.1	REF81MG2162	Free-living	100	45.249	2693493	2693493	89.6	2435	2435	277	58.5
GCF_000413015.1	REF81MG2163	Free-living	100	48.09	2742149	2742149	89.56	2424	2424	292	69
GCF_000413035.1	REF81MG2164	Free-living	100	44.066	2727508	2727508	87.11	2333	2333	293	77
GCF_000413055.1	REF81MG2165	Free-living	100	47.822	2530388	2530388	92.56	2284	2284	298	32
GCF_000413315.1	REF81MG2166	Free-living	100	61.211	2711056	2711056	89.86	2512	2512	280	46
GCF_000414175.1	REF81MG2167	Free-living	100	44.201	4734285	4734285	89.36	4263	4263	276	69
GCF_000415185.1	REF81MG2168	Free-living	100	38.404	2933038	2933038	87.93	2804	2804	251	76
GCF_000416985.1	REF81MG2169	Free-living	100	40.855	5126359	5126359	90.79	4333	4333	298	63
GCF_000016665.1	REF81MG217	Free-living	100	60.387	5801598	5801598	87.46	4942	4942	289	64
GCF_000418365.1	REF81MG2170	Free-living	100	67.018	2751233	2751233	90.6	2398	2398	300	49
GCF_000419445.1	REF81MG2171	Free-living	100	70.926	2944984	2944984	92.77	2740	2740	299	41
GCF_000419525.1	REF81MG2172	Free-living	100	47.84	5185674	5185674	91.12	4684	4684	289	64
GCF_000419585.1	REF81MG2173	Free-living	100	63.469	3399024	3399024	88.36	2763	2763	291	85
GCF_000419685.1	REF81MG2174	Free-living	100	34.968	3079036	3079036	89.62	2768	2768	270.5	77
GCF_000420025.1	REF81MG2175	Free-living	100	74.435	4470560	4470560	90.81	4097	4097	290	70
GCF_000420045.1	REF81MG2176	Free-living	100	64.913	2424065	2424065	93.14	2312	2312	282.5	32
GCF_000420065.1	REF81MG2177	Free-living	100	53.429	2022936	2022936	90.72	1698	1698	305	62
GCF_000420085.1	REF81MG2178	Free-living	100	50.579	6119470	6119470	88.47	5402	5402	286	61
GCF_000420105.1	REF81MG2179	Membrane asociated or intracellular parasite	100	25.363	710549	710549	72.28	1211	1211	101	97
GCF_000016745.1	REF81MG218	Free-living	100	54.238	5136364	5136364	87.85	4541	4541	276	82
GCF_000420145.1	REF81MG2180	Free-living	100	67.245	3049695	3049695	93.16	2919	2919	291	38
GCF_000420245.1	REF81MG2181	Free-living	100	39.114	3979980	3979980	89.14	3561	3561	260	73
GCF_000420265.1	REF81MG2182	Free-living	100	62.501	3018426	3018426	91.73	2830	2830	277	61
GCF_000420305.1	REF81MG2183	Free-living	100	62.389	3068208	3068208	91.01	2870	2870	278	56
GCF_000420325.1	REF81MG2184	Free-living	100	57.28	3947342	3947342	92.27	3689	3689	280	44
GCF_000420345.1	REF81MG2185	Free-living	100	39.035	1992636	1992636	91.91	1961	1961	263	31
GCF_000420365.1	REF81MG2186	Free-living	100	43.054	1358385	1358385	90.32	1322	1322	270	65
GCF_000420385.1	REF81MG2187	Free-living	100	37.031	1749386	1749386	95.47	1762	1762	276.5	4
GCF_000420405.1	REF81MG2188	Free-living	100	56.178	2270293	2270293	92.55	1988	1988	302	40
GCF_000420425.1	REF81MG2189	Free-living	100	57.561	2338426	2338426	91.28	2040	2040	305	63
GCF_000016765.1	REF81MG219	Free-living	100	68.398	5382261	5382261	91.66	4923	4923	294	51
GCF_000420445.1	REF81MG2190	Free-living	100	50.877	1920341	1920341	87.55	1643	1643	293	97
GCF_000420465.1	REF81MG2191	Free-living	100	57.364	3391683	3391683	87.76	2868	2868	293	93
GCF_000420485.1	REF81MG2192	Free-living	100	63.658	3701832	3701832	90.33	3365	3365	281	61
GCF_000420505.1	REF81MG2193	Free-living	100	46.65	1847146	1847146	88.54	1555	1555	295	65
GCF_000420525.1	REF81MG2194	Free-living	100	49.769	2612795	2612795	93.03	2398	2398	273	37
GCF_000420545.1	REF81MG2195	Free-living	100	65.648	3091755	3091755	93.24	2870	2870	279	43
GCF_000420605.1	REF81MG2196	Free-living	100	64.995	2183019	2183019	91.05	1958	1958	296	50
GCF_000420625.1	REF81MG2197	Free-living	100	60.628	3690548	3690548	91.32	3461	3461	282	53
GCF_000420645.1	REF81MG2198	Free-living	100	64.419	4515285	4515285	91.86	3976	3976	295	51
GCF_000420665.1	REF81MG2199	Free-living	100	54.812	3400379	3400379	91.07	3340	3340	258	59
GCF_000007945.1	REF81MG22	Free-living	100	38.22	1698955	1698955	89.5	1683	1683	242	70
GCF_000016785.1	REF81MG220	Free-living	100	46.101	1823511	1823511	95.63	1804	1804	284	6
GCF_000420705.1	REF81MG2200	Free-living	100	56.413	6008309	6008309	86.64	4984	4984	281	119
GCF_000420725.1	REF81MG2201	Free-living	100	48.042	3139679	3139679	88.07	3165	3165	259	76
GCF_000420745.1	REF81MG2202	Free-living	100	58.502	3430274	3430274	90.59	3396	3396	265	61
GCF_000420765.1	REF81MG2203	Free-living	100	64.487	2613739	2613739	92.39	2532	2532	266	35
GCF_000420805.1	REF81MG2204	Free-living	100	55.648	2775456	2775456	91.43	2574	2574	291	53
GCF_000421005.1	REF81MG2205	Free-living	100	54.856	3040979	3040979	91.22	2636	2636	282	56
GCF_000421045.1	REF81MG2206	Free-living	100	43.275	3222863	3222863	93.19	2869	2869	301	28
GCF_000421065.1	REF81MG2207	Free-living	100	58.827	6136933	6136933	87.04	5269	5269	277	95
GCF_000421105.1	REF81MG2208	Free-living	100	48.528	2971658	2971658	91.44	2716	2716	281	16
GCF_000421145.1	REF81MG2209	Free-living	100	64.38	4802534	4802534	91.43	4532	4532	291	56
GCF_000016825.1	REF81MG221	Free-living	100	38.873	1999618	1999618	88.38	1983	1983	254	68
GCF_000421165.1	REF81MG2210	Free-living	100	56.76	3830061	3830061	92.14	3514	3514	289.5	49
GCF_000421185.1	REF81MG2211	Free-living	100	72.94	3852644	3852644	92.41	3524	3524	292.5	44
GCF_000421225.1	REF81MG2212	Free-living	100	70.048	4174923	4174923	91.45	3782	3782	297	54
GCF_000421245.1	REF81MG2213	Free-living	100	72.215	3396505	3396505	91.5	3208	3208	279	43
GCF_000421265.1	REF81MG2214	Free-living	100	53.416	4746254	4746254	88.88	4349	4349	290	87
GCF_000421285.1	REF81MG2215	Free-living	100	51.237	5118755	5118755	90.68	4688	4688	281.5	36
GCF_000421345.1	REF81MG2216	Free-living	100	40.22	3309485	3309485	92.99	2848	2848	297	46
GCF_000421445.1	REF81MG2217	Free-living	100	63.39	5104726	5104726	90.33	4901	4901	273	62
GCF_000421465.1	REF81MG2218	Free-living	100	58.281	3509607	3509607	91.41	3358	3358	263	29
GCF_000421485.1	REF81MG2219	Free-living	100	39.826	1653625	1653625	94.7	1674	1674	274	12
GCF_000016905.1	REF81MG222	Free-living	100	31.4	1915238	1915238	93.63	1926	1926	270	11
GCF_000421525.1	REF81MG2220	Free-living	100	68.549	2990149	2990149	92.07	2630	2630	303	51
GCF_000421545.1	REF81MG2221	Free-living	100	70.193	3730505	3730505	91.49	3370	3370	296	59
GCF_000421565.1	REF81MG2222	Free-living	100	69.133	4303916	4303916	92.02	3947	3947	292	54
GCF_000421585.1	REF81MG2223	Free-living	100	44.969	2302285	2302285	93.45	2202	2202	277.5	13
GCF_000421625.1	REF81MG2224	Free-living	100	68.351	2263010	2263010	94.83	2341	2341	263	10
GCF_000421665.1	REF81MG2225	Free-living	100	38.244	2242440	2242440	87.53	2036	2036	270	86
GCF_000421745.1	REF81MG2226	Free-living	100	63.748	2591866	2591866	91.99	2329	2329	304	53
GCF_000421765.1	REF81MG2227	Free-living	100	48.264	3022325	3022325	89.45	2781	2781	271	69
GCF_000421825.1	REF81MG2228	Free-living	100	68.011	3693075	3693075	90.39	3249	3249	302	72
GCF_000422085.1	REF81MG2229	Free-living	100	55.352	5238612	5238612	88.06	4855	4855	283	71
GCF_000016985.1	REF81MG223	Free-living	100	36.822	4929566	4929566	85.17	4805	4805	247	87
GCF_000422165.1	REF81MG2230	Free-living	100	36.926	2225962	2225962	86.88	2407	2407	220	67
GCF_000422205.1	REF81MG2231	Free-living	100	67.986	3912295	3912295	89.09	3436	3436	288	63
GCF_000422245.1	REF81MG2232	Free-living	100	64.482	3202328	3202328	90.32	2917	2917	284	55
GCF_000422265.1	REF81MG2233	Free-living	100	41.475	2982326	2982326	89.97	2661	2661	271	71
GCF_000422285.1	REF81MG2234	Free-living	100	58.748	4667344	4667344	86.33	3939	3939	282	82
GCF_000422305.1	REF81MG2235	Free-living	100	68.459	3416011	3416011	88.55	3026	3026	274	95
GCF_000422325.1	REF81MG2236	Free-living	100	43.12	2836070	2836070	92.74	2614	2614	288	36.5
GCF_000422345.1	REF81MG2237	Free-living	100	55.119	3435542	3435542	92.25	3195	3195	280	46
GCF_000422365.1	REF81MG2238	Free-living	100	31.402	2966206	2966206	92.72	2688	2688	274.5	55
GCF_000422385.1	REF81MG2239	Free-living	100	71.4	2809959	2809959	92.79	2615	2615	299	33
GCF_000017005.1	REF81MG224	Free-living	100	40.507	2196662	2196662	89.72	2052	2052	260	67
GCF_000422405.1	REF81MG2240	Free-living	100	70.69	3115873	3115873	90.77	2802	2802	294	49
GCF_000422425.1	REF81MG2241	Free-living	100	47.771	5325321	5325321	85.22	4462	4462	284	135
GCF_000422445.1	REF81MG2242	Free-living	100	43.232	5027965	5027965	85.59	4395	4395	273	117
GCF_000422465.1	REF81MG2243	Free-living	100	50.677	6968425	6968425	87.26	6228	6228	287	88
GCF_000422485.1	REF81MG2244	Free-living	100	63.073	5714182	5714182	87.05	4830	4830	297	93
GCF_000422505.1	REF81MG2245	Free-living	100	48.527	6760575	6760575	86.29	6048	6048	271	95
GCF_000422525.1	REF81MG2246	Free-living	100	45.008	3401714	3401714	85.52	2937	2937	281	99
GCF_000422565.1	REF81MG2247	Free-living	100	66.158	3419064	3419064	91.19	3235	3235	269	38
GCF_000422585.1	REF81MG2248	Free-living	100	41.895	4254862	4254862	85.35	3347	3347	282	132
GCF_000422625.1	REF81MG2249	Free-living	100	64.311	3009872	3009872	88.23	2421	2421	301	95
GCF_000017105.1	REF81MG225	Free-living	100	42.436	2158758	2158758	89.55	2053	2053	263	54
GCF_000422645.1	REF81MG2250	Free-living	100	58.644	4296027	4296027	89.1	3876	3876	281	65
GCF_000422665.1	REF81MG2251	Free-living	100	53.935	3885737	3885737	89.27	3445	3445	280	68
GCF_000422685.1	REF81MG2252	Free-living	100	30.019	3441043	3441043	91.46	3109	3109	271	61
GCF_000422705.1	REF81MG2253	Free-living	100	36.052	4002854	4002854	89.91	3473	3473	272	73
GCF_000422725.1	REF81MG2254	Free-living	100	41.538	4638566	4638566	89.36	4056	4056	271	74
GCF_000422745.1	REF81MG2255	Free-living	100	68.14	3017924	3017924	93.05	2801	2801	293	38
GCF_000422765.1	REF81MG2256	Free-living	100	43.734	4391552	4391552	90.46	4164	4164	272	61
GCF_000422785.1	REF81MG2257	Free-living	100	55.004	4157019	4157019	88.31	3755	3755	289	78
GCF_000422805.1	REF81MG2258	Free-living	100	71.951	4856512	4856512	92.22	4659	4659	285	33
GCF_000422825.1	REF81MG2259	Free-living	100	70.772	4060447	4060447	90.73	3636	3636	300.5	70
GCF_000017165.1	REF81MG226	Free-living	100	31.328	1720048	1720048	87.98	1744	1744	251	62
GCF_000422845.1	REF81MG2260	Free-living	100	55.236	4505834	4505834	88.13	3954	3954	288	83
GCF_000422865.1	REF81MG2261	Free-living	100	45.877	3709807	3709807	87.82	3267	3267	278	98
GCF_000422885.1	REF81MG2262	Free-living	100	58.553	7048723	7048723	89.6	6460	6460	294	62
GCF_000422905.1	REF81MG2263	Free-living	100	44.8	8329305	8329305	87.32	7846	7846	270	78
GCF_000422925.1	REF81MG2264	Free-living	100	62.141	4332940	4332940	89.34	3995	3995	279	58
GCF_000422945.1	REF81MG2265	Free-living	100	37.767	3445768	3445768	90.72	3053	3053	281	67
GCF_000422965.1	REF81MG2266	Free-living	100	62.99	5230452	5230452	87.84	4817	4817	285	84
GCF_000422985.1	REF81MG2267	Free-living	100	67.77	2954426	2954426	92.9	2814	2814	271	34
GCF_000423005.1	REF81MG2268	Free-living	100	36.848	4430943	4430943	87.82	3840	3840	278	94
GCF_000423025.1	REF81MG2269	Free-living	100	69.296	3330647	3330647	92.33	3064	3064	293.5	48
GCF_000017185.1	REF81MG227	Free-living	100	30.037	1569500	1569500	85.7	1525	1525	257	93
GCF_000423045.1	REF81MG2270	Free-living	100	39.529	3269398	3269398	92.38	2980	2980	280	48
GCF_000423085.1	REF81MG2271	Free-living	100	68.902	4117723	4117723	90.81	3751	3751	282	47
GCF_000423105.1	REF81MG2272	Free-living	100	37.427	2707549	2707549	89.18	2751	2751	259	66
GCF_000423125.1	REF81MG2273	Free-living	100	60.786	4258722	4258722	92.49	3903	3903	290	35
GCF_000423145.1	REF81MG2274	Free-living	100	28.38	1573767	1573767	91.77	1396	1396	279.5	22
GCF_000423165.1	REF81MG2275	Free-living	100	50.351	2624474	2624474	94.01	2399	2399	292	24
GCF_000423185.1	REF81MG2276	Free-living	100	69.869	7413714	7413714	90.09	6960	6960	289	60
GCF_000423205.1	REF81MG2277	Free-living	100	57.055	3038127	3038127	90.74	2736	2736	289.5	64
GCF_000423225.1	REF81MG2278	Free-living	100	67.109	4839203	4839203	88.72	4507	4507	291	74
GCF_000423245.1	REF81MG2279	Free-living	100	33.649	1385752	1385752	90.06	1269	1269	276	64
GCF_000017225.1	REF81MG228	Free-living	100	33.284	1772694	1772694	88.82	1832	1832	244.5	49
GCF_000423265.1	REF81MG2280	Free-living	100	42.504	1720753	1720753	88.92	1726	1726	245	68
GCF_000423305.1	REF81MG2281	Free-living	100	39.949	3764213	3764213	88.3	3186	3186	282	81
GCF_000423325.1	REF81MG2282	Free-living	100	70.314	2722122	2722122	92.51	2516	2516	277	44
GCF_000423345.1	REF81MG2283	Free-living	100	57.868	4502291	4502291	89.64	3756	3756	297	70
GCF_000423365.1	REF81MG2284	Free-living	100	52.615	3539530	3539530	91.83	3457	3457	279	42
GCF_000423385.1	REF81MG2285	Free-living	100	33.628	2157372	2157372	90.29	2030	2030	279	56
GCF_000423405.1	REF81MG2286	Free-living	100	35.103	3205558	3205558	91.7	2933	2933	271	55
GCF_000423425.1	REF81MG2287	Free-living	100	63.117	2747076	2747076	93.81	2759	2759	268	29
GCF_000423445.1	REF81MG2288	Free-living	100	67.96	2938072	2938072	90.11	2613	2613	290	70
GCF_000423465.1	REF81MG2289	Free-living	100	69.87	3623963	3623963	90.03	3296	3296	285	57
GCF_000017245.1	REF81MG229	Free-living	100	44.919	2319663	2319663	90.04	2137	2137	281	73.5
GCF_000423485.1	REF81MG2290	Free-living	100	56.061	2035623	2035623	91.56	1824	1824	287	47
GCF_000423505.1	REF81MG2291	Free-living	100	64.254	2223047	2223047	92.57	2037	2037	293	39
GCF_000423525.1	REF81MG2292	Free-living	100	36.406	2411055	2411055	92.25	2259	2259	284	36
GCF_000423565.1	REF81MG2293	Free-living	100	42.043	7600634	7600634	89.98	6339	6339	290	73
GCF_000423585.1	REF81MG2294	Free-living	100	41.181	3764506	3764506	88.78	3338	3338	275	70
GCF_000423605.1	REF81MG2295	Free-living	100	55.31	4743148	4743148	88.69	4265	4265	281	83
GCF_000423625.1	REF81MG2296	Free-living	100	71.744	5056835	5056835	89.83	4958	4958	258	52
GCF_000423645.1	REF81MG2297	Free-living	100	63.808	3554982	3554982	90.42	3403	3403	273	59
GCF_000423665.1	REF81MG2298	Free-living	100	71.425	9313965	9313965	93.92	8590	8590	284	20
GCF_000423705.1	REF81MG2299	Free-living	100	64.679	4623171	4623171	89.11	4186	4186	290.5	72
GCF_000008025.1	REF81MG23	Obligate intracellular symbiont	100	35.235	1267782	1267782	84.49	1271	1271	217	69
GCF_000017265.1	REF81MG230	Free-living	100	71.346	3996255	3996255	91.6	3885	3885	266	50
GCF_000423745.1	REF81MG2300	Free-living	100	41.045	2103464	2103464	89.31	2070	2070	255	55.5
GCF_000423765.1	REF81MG2301	Free-living	100	40.723	2290936	2290936	88.8	2271	2271	249	54
GCF_000423785.1	REF81MG2302	Free-living	100	35.932	2081554	2081554	88.42	1985	1985	254	82
GCF_000423805.1	REF81MG2303	Free-living	100	67.362	5084548	5084548	89.87	4668	4668	290	71
GCF_000423825.1	REF81MG2304	Free-living	100	66.842	2958498	2958498	90.38	2875	2875	255	45
GCF_000423845.1	REF81MG2305	Free-living	100	37.026	1729593	1729593	93.87	1710	1710	269	15
GCF_000423865.1	REF81MG2306	Free-living	100	34.421	1871474	1871474	93.77	1892	1892	264	9
GCF_000423885.1	REF81MG2307	Free-living	100	67.896	3151451	3151451	92.34	2874	2874	278	47
GCF_000423905.1	REF81MG2308	Free-living	100	64.765	2165150	2165150	95.24	2230	2230	265	11
GCF_000424025.1	REF81MG2309	Free-living	100	29.596	3561289	3561289	88.84	3470	3470	256	68
GCF_000017305.1	REF81MG231	Free-living	100	74.435	4761183	4761183	90.12	4502	4502	282	53
GCF_000424105.1	REF81MG2310	Free-living	100	35.243	2871860	2871860	88.22	2522	2522	285	91
GCF_000424165.1	REF81MG2311	Free-living	100	41.44	4147770	4147770	90.91	3545	3545	310	62
GCF_000424185.1	REF81MG2312	Free-living	100	51.466	2908381	2908381	90.54	2442	2442	294.5	62
GCF_000424205.1	REF81MG2313	Free-living	100	31.077	3542160	3542160	88.82	3342	3342	267	74
GCF_000424425.1	REF81MG2314	Free-living	100	39.668	4315442	4315442	87.04	3603	3603	305	108
GCF_000424465.1	REF81MG2315	Free-living	100	40.936	3372542	3372542	90.3	3053	3053	291	54
GCF_000424545.1	REF81MG2316	Free-living	100	35.5	3871453	3871453	89.02	3273	3273	306	76
GCF_000424585.1	REF81MG2317	Free-living	100	44.001	3813073	3813073	90.24	3146	3146	309	71
GCF_000424625.1	REF81MG2318	Free-living	100	72.4	5695417	5695417	93.52	5438	5438	280	26
GCF_000424665.1	REF81MG2319	Free-living	100	40.334	3544726	3544726	90.04	3166	3166	279	67
GCF_000017405.1	REF81MG232	Free-living	100	56.119	4783208	4783208	88.62	4586	4586	275	70
GCF_000424785.1	REF81MG2320	Free-living	100	72.213	7720660	7720660	86.82	6571	6571	294	101
GCF_000424825.1	REF81MG2321	Free-living	100	72.685	6788521	6788521	87.55	6105	6105	279	91
GCF_000424845.1	REF81MG2322	Free-living	100	72.515	5311812	5311812	86.28	4696	4696	277	105
GCF_000424965.1	REF81MG2323	Free-living	100	71.206	6582155	6582155	87.05	5487	5487	298	108
GCF_000424985.1	REF81MG2324	Free-living	100	36.787	4480165	4480165	87.25	3703	3703	285	94
GCF_000425005.1	REF81MG2325	Free-living	100	37.014	2335946	2335946	93.05	2264	2264	252	30
GCF_000425065.1	REF81MG2326	Free-living	100	74.099	8385432	8385432	90.14	7543	7543	289	62
GCF_000425105.1	REF81MG2327	Free-living	100	72.511	2677837	2677837	92.15	2594	2594	278	40
GCF_000425125.1	REF81MG2328	Free-living	100	44.79	5247653	5247653	85.66	4620	4620	278	115
GCF_000425145.1	REF81MG2329	Free-living	100	34.336	4021020	4021020	90.77	3419	3419	291	53
GCF_000017425.1	REF81MG233	Free-living	100	35.877	4087024	4087024	82.89	4071	4071	238	107
GCF_000425165.1	REF81MG2330	Free-living	100	50.801	4690166	4690166	87.15	4215	4215	276	91
GCF_000425185.1	REF81MG2331	Free-living	100	67.181	4620652	4620652	88.29	4194	4194	287	75
GCF_000425205.1	REF81MG2332	Free-living	100	42.657	3670551	3670551	88.11	3699	3699	254	77
GCF_000425225.1	REF81MG2333	Free-living	100	38.473	4276966	4276966	86.74	4249	4249	252	86
GCF_000425265.1	REF81MG2334	Free-living	100	41.734	4092653	4092653	88.34	3584	3584	290	82
GCF_000425285.1	REF81MG2335	Free-living	100	68.656	3028354	3028354	89.98	2683	2683	294	68
GCF_000425305.1	REF81MG2336	Free-living	100	33.369	3976448	3976448	88.54	3577	3577	259	76
GCF_000425345.1	REF81MG2337	Free-living	100	46.191	4351767	4351767	91.81	3948	3948	272.5	53
GCF_000425365.1	REF81MG2338	Free-living	100	73.385	3834117	3834117	93.29	3692	3692	287	24
GCF_000425385.1	REF81MG2339	Free-living	100	62.9	6110349	6110349	91.72	5587	5587	275	32
GCF_000017465.2	REF81MG234	Free-living	100	44.535	1971270	1971270	91.94	1941	1941	261	13
GCF_000425405.1	REF81MG2340	Free-living	100	56.786	4930960	4930960	88.28	4423	4423	277	64
GCF_000425465.1	REF81MG2341	Free-living	100	33.787	3192093	3192093	91.77	2840	2840	272	54
GCF_000425505.1	REF81MG2342	Free-living	100	34.042	3631041	3631041	88.29	3146	3146	274.5	87
GCF_000425525.1	REF81MG2343	Free-living	100	47.601	4094708	4094708	91.79	3760	3760	294	42
GCF_000425545.1	REF81MG2344	Free-living	100	41.406	3318653	3318653	86.37	3257	3257	255	78
GCF_000425565.1	REF81MG2345	Free-living	100	64.798	2220236	2220236	94.38	2111	2111	285	19
GCF_000425585.1	REF81MG2346	Free-living	100	48.051	4686152	4686152	90.69	3967	3967	288	71
GCF_000425625.1	REF81MG2347	Free-living	100	66.734	5017423	5017423	87.77	4520	4520	283	67
GCF_000425645.1	REF81MG2348	Free-living	100	34.308	3089149	3089149	91.32	2671	2671	291	63
GCF_000425685.1	REF81MG2349	Free-living	100	64.291	3379129	3379129	91.03	3101	3101	286	64
GCF_000017505.1	REF81MG235	Free-living	100	73.531	5277990	5277990	89.82	4589	4589	288	67
GCF_000425705.1	REF81MG2350	Free-living	100	47.008	3845569	3845569	88.03	3921	3921	258	74
GCF_000425725.1	REF81MG2351	Free-living	100	53.802	2876467	2876467	89.89	2662	2662	283	68.5
GCF_000425825.1	REF81MG2352	Free-living	100	36.758	2109822	2109822	91.38	2187	2187	261	51
GCF_000425845.1	REF81MG2353	Free-living	100	40.219	2345682	2345682	90.06	2371	2371	263	54.5
GCF_000425865.1	REF81MG2354	Free-living	100	37.585	2134509	2134509	86.58	1954	1954	276	85
GCF_000425885.1	REF81MG2355	Free-living	100	53.096	3134829	3134829	90.72	3049	3049	265	61
GCF_000425905.1	REF81MG2356	Free-living	100	35.585	1542852	1542852	92.5	1340	1340	286	52
GCF_000425945.1	REF81MG2357	Free-living	100	72.242	6640086	6640086	91.42	6441	6441	269	30
GCF_000426005.1	REF81MG2358	Free-living	100	66.748	3223982	3223982	91.18	3017	3017	266	56
GCF_000426045.1	REF81MG2359	Free-living	100	69.848	4829548	4829548	92.89	4623	4623	284	32
GCF_000017545.1	REF81MG236	Free-living	100	34.989	1948941	1948941	92.24	1827	1827	289	35
GCF_000426085.1	REF81MG2360	Free-living	100	39.073	5377210	5377210	82.3	5244	5244	245	120
GCF_000426125.1	REF81MG2361	Free-living	100	68.029	4904121	4904121	92	4634	4634	280	35
GCF_000426225.1	REF81MG2362	Free-living	100	42.349	4469042	4469042	86.47	3748	3748	267	100
GCF_000426285.1	REF81MG2363	Free-living	100	59.363	6679728	6679728	87.37	6416	6416	269	84
GCF_000426305.1	REF81MG2364	Free-living	100	31.487	3263520	3263520	87.36	2897	2897	264	73
GCF_000426325.1	REF81MG2365	Free-living	100	73.053	5932917	5932917	88.16	5108	5108	287	91
GCF_000426365.1	REF81MG2366	Free-living	100	70.761	3159341	3159341	92.45	2815	2815	284	47
GCF_000426385.1	REF81MG2367	Free-living	100	71.796	3995323	3995323	90.91	3709	3709	284	63
GCF_000426445.1	REF81MG2368	Free-living	100	70.903	4094970	4094970	90.44	3538	3538	315	72.5
GCF_000426465.1	REF81MG2369	Free-living	100	36.582	4118409	4118409	90.05	3744	3744	266	72
GCF_000017565.1	REF81MG237	Free-living	100	62.328	3914745	3914745	90.29	3695	3695	271	61
GCF_000426485.1	REF81MG2370	Free-living	100	37.72	4377988	4377988	88.83	3551	3551	301	81
GCF_000426505.1	REF81MG2371	Free-living	100	60.5	4626718	4626718	91.12	4276	4276	289	55
GCF_000426525.1	REF81MG2372	Free-living	100	73.079	4854484	4854484	91.25	4578	4578	286	49
GCF_000426565.1	REF81MG2373	Free-living	100	41.188	2668851	2668851	90.97	2259	2259	297	40
GCF_000426585.1	REF81MG2374	Free-living	100	53.04	3128717	3128717	89.9	2494	2494	314	52
GCF_000426605.1	REF81MG2375	Free-living	100	70.57	3043901	3043901	87.91	2553	2553	294	75
GCF_000426625.1	REF81MG2376	Free-living	100	31.824	3539325	3539325	86.41	3301	3301	273	74
GCF_000426645.1	REF81MG2377	Free-living	100	68.921	5820860	5820860	91.42	5085	5085	300	55
GCF_000426665.1	REF81MG2378	Free-living	100	56.794	2350599	2350599	91.52	2183	2183	280	38
GCF_000426685.1	REF81MG2379	Free-living	100	68.859	4460203	4460203	90.69	3928	3928	293.5	59
GCF_000017585.1	REF81MG238	Free-living	100	31.733	1711273	1711273	87.79	1627	1627	256	17
GCF_000426705.1	REF81MG2380	Free-living	100	36.969	3949848	3949848	92.32	3646	3646	287	28
GCF_000426725.1	REF81MG2381	Free-living	100	36.09	6344326	6344326	88.81	5174	5174	273	82
GCF_000426745.1	REF81MG2382	Free-living	100	36.939	1870913	1870913	84.29	1588	1588	278.5	79
GCF_000426765.1	REF81MG2383	Free-living	100	41.924	3823881	3823881	87.36	3432	3432	284	95
GCF_000426825.1	REF81MG2384	Free-living	100	48.76	2954967	2954967	92.28	2579	2579	291	60
GCF_000426885.1	REF81MG2385	Free-living	100	44.343	2602231	2602231	87.02	2487	2487	235	89
GCF_000426925.1	REF81MG2386	Free-living	100	37.332	4405846	4405846	81.63	4034	4034	237	135
GCF_000427095.1	REF81MG2387	Free-living	100	54.41	3437861	3437861	90.52	2887	2887	313	55
GCF_000427295.1	REF81MG2388	Free-living	100	38.754	6291928	6291928	87.01	5492	5492	269	80
GCF_000427335.1	REF81MG2389	Free-living	100	33.485	4337031	4337031	89.46	4002	4002	254	77
GCF_000017625.1	REF81MG239	Free-living	100	54.514	2542943	2542943	87.18	2528	2528	243	66
GCF_000427365.1	REF81MG2390	Free-living	100	57.003	2880076	2880076	83.34	2315	2315	295	106
GCF_000427385.1	REF81MG2391	Free-living	100	57.03	5022295	5022295	84.23	4621	4621	253	78
GCF_000427405.1	REF81MG2392	Free-living	100	37.766	6221030	6221030	85.88	4930	4930	296	119
GCF_000427425.1	REF81MG2393	Free-living	100	41.918	2499862	2499862	91.45	2474	2474	275	29
GCF_000427445.1	REF81MG2394	Free-living	100	61.843	4103433	4103433	84.68	3676	3676	258	111
GCF_000427625.1	REF81MG2395	Free-living	100	51.113	5029135	5029135	86.55	4571	4571	256	72
GCF_000427645.1	REF81MG2396	Free-living	100	67.195	3920299	3920299	89.66	3559	3559	274	65
GCF_000427665.1	REF81MG2397	Free-living	100	68.546	5698370	5698370	89.7	5158	5158	295	55
GCF_000427685.1	REF81MG2398	Free-living	100	65.004	3797935	3797935	86.97	3950	3950	231	68
GCF_000427785.1	REF81MG2399	Free-living	100	65.301	6111684	6111684	90.51	5354	5354	291	60
GCF_000008045.1	REF81MG24	Obligate intracelullar parasite	100	28.919	1111496	1111496	76.31	865	865	270	131.5
GCF_000017645.1	REF81MG240	Free-living	100	67.465	5308934	5308934	87.49	4850	4850	277	83
GCF_000427805.1	REF81MG2400	Free-living	100	45.68	5668731	5668731	84.72	4950	4950	264	97
GCF_000427825.1	REF81MG2401	Free-living	100	68.885	4526423	4526423	89.83	4197	4197	278	54.5
GCF_000427865.1	REF81MG2402	Free-living	100	61.462	2917684	2917684	91.19	2761	2761	275	49
GCF_000427885.1	REF81MG2403	Free-living	100	70.363	5735294	5735294	88.62	5307	5307	279	69
GCF_000427905.1	REF81MG2404	Free-living	100	69.875	4196086	4196086	87.19	3770	3770	279	73
GCF_000427965.1	REF81MG2405	Free-living	100	44.611	5053571	5053571	90.4	4393	4393	286	68
GCF_000428045.1	REF81MG2406	Free-living	100	56.607	4588530	4588530	88.43	4239	4239	262	75
GCF_000428065.1	REF81MG2407	Free-living	100	38.31	4185101	4185101	81.42	4216	4216	223	110
GCF_000428125.1	REF81MG2408	Free-living	100	41.466	3633399	3633399	90.72	3063	3063	297	49
GCF_000428145.1	REF81MG2409	Free-living	100	62.58	3968450	3968450	87.83	3571	3571	267	89
GCF_000017685.1	REF81MG241	Free-living	100	38.922	3877332	3877332	93.46	3629	3629	287	26
GCF_000428465.1	REF81MG2410	Free-living	100	68.738	5586102	5586102	86.71	4564	4564	279	101
GCF_000428525.1	REF81MG2411	Free-living	100	48.376	3208823	3208823	92.59	3039	3039	277	35
GCF_000428585.1	REF81MG2412	Free-living	100	41.017	5798664	5798664	86.65	4940	4940	252	93.5
GCF_000428685.1	REF81MG2413	Free-living	100	70	3171092	3171092	88.92	2560	2560	309	87
GCF_000428705.1	REF81MG2414	Membrane asociated or intracellular parasite	100	27.978	1807123	1807123	93.29	1624	1624	282	24
GCF_000428745.1	REF81MG2415	Free-living	100	44.572	2203313	2203313	87.93	1959	1959	285	70
GCF_000428765.1	REF81MG2416	Free-living	100	65.088	2579573	2579573	92.33	2582	2582	257	43
GCF_000428785.1	REF81MG2417	Free-living	100	56.078	2118625	2118625	88.51	2001	2001	257	77
GCF_000428805.1	REF81MG2418	Free-living	100	49.796	2910197	2910197	88.61	2649	2649	272	43
GCF_000428825.1	REF81MG2419	Free-living	100	63.635	3782107	3782107	89.86	3318	3318	286	47
GCF_000017705.1	REF81MG242	Free-living	100	45.445	5969369	5969369	86.12	5516	5516	263	94
GCF_000428845.1	REF81MG2420	Free-living	100	45.65	6287614	6287614	91.29	5495	5495	287	64
GCF_000428865.1	REF81MG2421	Free-living	100	38.776	1869643	1869643	87.88	1796	1796	263.5	64.5
GCF_000428885.1	REF81MG2422	Free-living	100	68.85	3289813	3289813	92.05	2903	2903	292	50
GCF_000428905.1	REF81MG2423	Free-living	100	41.141	4363047	4363047	86.87	3804	3804	281	87
GCF_000428925.1	REF81MG2424	Free-living	100	43.336	2862294	2862294	86.52	2700	2700	256	90
GCF_000428945.1	REF81MG2425	Free-living	100	70.802	9478888	9478888	89.97	8283	8283	284	65
GCF_000428985.1	REF81MG2426	Free-living	100	56.386	4380400	4380400	92.15	4164	4164	272	39
GCF_000429005.1	REF81MG2427	Free-living	100	64.25	3709060	3709060	92.17	3362	3362	291	41
GCF_000429025.1	REF81MG2428	Free-living	100	69.403	9537556	9537556	89.03	8581	8581	279	58
GCF_000429045.1	REF81MG2429	Free-living	100	71.771	5245321	5245321	89.71	4833	4833	285	66
GCF_000017805.1	REF81MG243	Free-living	100	60.69	5723298	5723298	86.01	4851	4851	289	71
GCF_000429065.1	REF81MG2430	Free-living	100	71.02	2647044	2647044	93.95	2376	2376	290	26
GCF_000429085.1	REF81MG2431	Free-living	100	70.377	7070406	7070406	87.97	6422	6422	281	84
GCF_000429105.1	REF81MG2432	Free-living	100	56.383	2294128	2294128	90.55	1929	1929	307	66
GCF_000429125.1	REF81MG2433	Free-living	100	36.844	4042904	4042904	87.21	3621	3621	266	93
GCF_000429145.1	REF81MG2434	Free-living	100	48.438	3783840	3783840	92.59	3405	3405	287	41
GCF_000429165.1	REF81MG2435	Free-living	100	60.451	4270516	4270516	86.37	3817	3817	281	95
GCF_000429225.1	REF81MG2436	Free-living	100	73.073	3531393	3531393	86.85	2841	2841	299	90
GCF_000429265.1	REF81MG2437	Free-living	100	70.712	3420019	3420019	86.88	2814	2814	304	97
GCF_000429305.1	REF81MG2438	Free-living	100	49.088	5767550	5767550	88.23	4973	4973	283	82
GCF_000429325.1	REF81MG2439	Free-living	100	62.788	4705742	4705742	87.8	4174	4174	278.5	74
GCF_000017845.1	REF81MG244	Free-living	100	37.931	5363972	5363972	86.05	4997	4997	247	103
GCF_000429345.1	REF81MG2440	Free-living	100	61.267	3060447	3060447	90.89	3153	3153	250	34
GCF_000429365.1	REF81MG2441	Free-living	100	63.56	4728486	4728486	89.99	4442	4442	278	68
GCF_000429405.1	REF81MG2442	Free-living	100	41.874	4431678	4431678	91.13	3880	3880	290	52
GCF_000429425.1	REF81MG2443	Free-living	100	42.722	4152949	4152949	91.79	3635	3635	291	56
GCF_000429445.1	REF81MG2444	Free-living	100	47.816	5783376	5783376	88.98	4924	4924	284.5	76
GCF_000429465.1	REF81MG2445	Free-living	100	42.82	4712065	4712065	91.11	4025	4025	296	59
GCF_000429485.1	REF81MG2446	Free-living	100	53.301	4878345	4878345	89.49	4386	4386	286	72
GCF_000429525.1	REF81MG2447	Free-living	100	58.162	3272318	3272318	88.79	3329	3329	251	67
GCF_000429545.1	REF81MG2448	Free-living	100	37.619	4989751	4989751	87.15	4101	4101	287	93
GCF_000429565.1	REF81MG2449	Free-living	100	37.437	3670548	3670548	86.04	3499	3499	229	73
GCF_000017865.1	REF81MG245	Free-living	100	38.697	2135342	2135342	94.91	2077	2077	296	12
GCF_000429585.1	REF81MG2450	Free-living	100	45.541	2267201	2267201	89.42	2227	2227	251	75
GCF_000429605.1	REF81MG2451	Free-living	100	62.778	3341181	3341181	93.81	3142	3142	275	16
GCF_000429625.1	REF81MG2452	Free-living	100	70.667	6512377	6512377	90.29	5948	5948	283	58
GCF_000429645.1	REF81MG2453	Free-living	100	62.871	5455784	5455784	89.59	4706	4706	292	76
GCF_000429665.1	REF81MG2454	Free-living	100	65.416	4025691	4025691	91.71	3595	3595	274	34
GCF_000429685.1	REF81MG2455	Free-living	100	44.63	4418137	4418137	87.01	4363	4363	264	74
GCF_000429705.1	REF81MG2456	Free-living	100	42.458	4023079	4023079	84.56	3955	3955	255	101
GCF_000429725.1	REF81MG2457	Free-living	100	52.584	3519702	3519702	84.29	3323	3323	258	88
GCF_000429765.1	REF81MG2458	Free-living	100	66.194	4523636	4523636	90.79	4344	4344	269	55
GCF_000429785.1	REF81MG2459	Free-living	100	56.041	3425989	3425989	90.54	3188	3188	272	67
GCF_000017945.1	REF81MG246	Free-living	100	56.52	1297538	1297538	93.49	1485	1485	231	31
GCF_000429825.1	REF81MG2460	Free-living	100	58.217	5051029	5051029	88.06	4566	4566	289	78
GCF_000429845.1	REF81MG2461	Free-living	100	63.26	4634066	4634066	88.28	4042	4042	296	85
GCF_000429865.1	REF81MG2462	Free-living	100	62.206	3713661	3713661	89.87	3557	3557	278	56
GCF_000429885.1	REF81MG2463	Free-living	100	59.43	2617709	2617709	90.1	2308	2308	296	73
GCF_000429905.1	REF81MG2464	Free-living	100	54.397	6469960	6469960	87.55	5292	5292	290	69
GCF_000429925.1	REF81MG2465	Free-living	100	54.847	4481975	4481975	88.12	3853	3853	286	62
GCF_000429945.1	REF81MG2466	Free-living	100	45.752	5800571	5800571	85.17	4915	4915	273	94
GCF_000429965.1	REF81MG2467	Free-living	100	57.514	4796810	4796810	86.07	3909	3909	297	89
GCF_000429985.1	REF81MG2468	Free-living	100	43.046	3909169	3909169	88.31	3441	3441	283	76
GCF_000430005.1	REF81MG2469	Free-living	100	53.502	3359127	3359127	85.41	2814	2814	276.5	121
GCF_000018025.1	REF81MG247	Free-living	100	46.078	5517674	5517674	84.82	4649	4649	280	121
GCF_000430025.1	REF81MG2470	Free-living	100	40.462	2880663	2880663	91.67	2719	2719	253	56
GCF_000430045.1	REF81MG2471	Free-living	100	68.664	4688964	4688964	85.35	4368	4368	259.5	81
GCF_000430505.1	REF81MG2472	Free-living	100	47.875	4030713	4030713	86.04	3433	3433	273	118
GCF_000430525.1	REF81MG2473	Free-living	100	43.977	2800206	2800206	87.18	2426	2426	271	68.5
GCF_000430545.1	REF81MG2474	Free-living	100	29.533	4124462	4124462	89.73	3675	3675	260	66
GCF_000430585.1	REF81MG2475	Free-living	100	57.129	3310509	3310509	88.06	3181	3181	276	83
GCF_000430605.1	REF81MG2476	Free-living	100	48.975	3338457	3338457	89.84	3114	3114	285	61
GCF_000430625.1	REF81MG2477	Free-living	100	44.789	4247673	4247673	86.25	4157	4157	255	81
GCF_000430645.1	REF81MG2478	Free-living	100	32.212	6245252	6245252	89.78	5540	5540	266	66
GCF_000430665.1	REF81MG2479	Free-living	100	31.327	4903219	4903219	87.4	4038	4038	271	89
GCF_000018105.1	REF81MG248	Free-living	100	47.254	6503724	6503724	85.02	5915	5915	248	101
GCF_000430685.1	REF81MG2480	Free-living	100	43.898	3242009	3242009	84.56	3140	3140	251.5	96
GCF_000430705.1	REF81MG2481	Free-living	100	63.58	4585800	4585800	89.58	4413	4413	274	63
GCF_000430725.1	REF81MG2482	Free-living	100	68.462	8786776	8786776	87.02	7945	7945	280	71
GCF_000430745.1	REF81MG2483	Free-living	100	41.352	4171218	4171218	86.88	4252	4252	248	81
GCF_000430765.1	REF81MG2484	Free-living	100	42.925	5052265	5052265	82.06	4890	4890	247	120
GCF_000430785.1	REF81MG2485	Free-living	100	40.472	5411691	5411691	80.14	5248	5248	232	138
GCF_000430805.1	REF81MG2486	Free-living	100	60.325	3685547	3685547	89.48	3462	3462	265	78
GCF_000430825.1	REF81MG2487	Free-living	100	36.135	4214564	4214564	88.98	4002	4002	250	78
GCF_000430845.1	REF81MG2488	Free-living	100	39.301	4439376	4439376	87.3	4030	4030	254	86
GCF_000430865.1	REF81MG2489	Free-living	100	69.971	4144558	4144558	89.94	3971	3971	265	64
GCF_000018145.1	REF81MG249	Free-living	100	66.015	3789584	3789584	90.55	3635	3635	275	53.5
GCF_000430885.1	REF81MG2490	Free-living	100	46.851	3471050	3471050	87.59	3430	3430	250.5	66
GCF_000430905.1	REF81MG2491	Free-living	100	51.303	1706782	1706782	89.24	1730	1730	253	36
GCF_000430995.1	REF81MG2492	Free-living	100	28.928	2644756	2644756	87.53	2360	2360	265	41
GCF_000438455.1	REF81MG2493	Free-living	100	36.533	1509734	1509734	93.6	1561	1561	249	31
GCF_000439085.1	REF81MG2494	Free-living	100	53.858	4219992	4219992	86.89	3741	3741	269	78
GCF_000439105.1	REF81MG2495	Free-living	100	28.368	4020458	4020458	87.29	3852	3852	262.5	85
GCF_000439435.1	REF81MG2496	Obligate intracelullar parasite	100	23.873	1075140	1075140	67.53	1978	1978	91	100
GCF_000439455.1	REF81MG2497	Obligate intracelullar parasite	100	25.459	945296	945296	71.07	1763	1763	92	92.5
GCF_000441555.1	REF81MG2498	Obligate intracellular symbiont	100	24.241	459399	459399	89.08	356	356	287	61
GCF_000442255.1	REF81MG2499	Free-living	100	67.057	5689389	5689389	88.59	5571	5571	265	63
GCF_000008205.1	REF81MG25	Membrane asociated or intracellular parasite	100	28.522	897405	897405	65.86	1334	1334	109	130
GCF_000018205.1	REF81MG250	Obligate intracelullar parasite	100	32.335	1231060	1231060	78.85	1308	1308	171	126
GCF_000442275.2	REF81MG2500	Free-living	100	60.25	3682651	3682651	91.54	3586	3586	275	42
GCF_000442315.1	REF81MG2501	Free-living	100	69.093	3163144	3163144	88.31	3214	3214	256	48
GCF_000442645.1	REF81MG2502	Free-living	100	66.668	2787574	2787574	90.79	2566	2566	284	51
GCF_000442905.1	REF81MG2503	Free-living	100	41.104	2869246	2869246	88.41	3094	3094	219	57
GCF_000443165.1	REF81MG2504	Free-living	100	64.278	4134817	4134817	91.36	3748	3748	283	52
GCF_000443995.1	REF81MG2505	Free-living	100	36.466	3233679	3233679	92.96	3095	3095	268	34
GCF_000444055.1	REF81MG2506	Free-living	100	52.187	4063548	4063548	88.26	4109	4109	252	73
GCF_000444875.1	REF81MG2507	Free-living	100	72.601	8272925	8272925	87.76	7087	7087	286	94
GCF_000444995.1	REF81MG2508	Free-living	100	63.385	3613807	3613807	90.06	3487	3487	271	58
GCF_000445105.1	REF81MG2509	Free-living	100	63.011	5360246	5360246	90.76	5244	5244	254	50
GCF_000018265.1	REF81MG251	Free-living	100	69.519	5786361	5786361	87.22	5068	5068	279	83
GCF_000445125.1	REF81MG2510	Free-living	100	64.555	4857434	4857434	89.73	4510	4510	268	65
GCF_000445145.1	REF81MG2511	Free-living	100	63.551	4848286	4848286	89.92	4734	4734	254	53
GCF_000445425.4	REF81MG2512	Free-living	100	28.718	907293	907293	92.92	827	827	288	21
GCF_000445445.1	REF81MG2513	Free-living	100	43.34	5383666	5383666	86.42	5115	5115	254	71
GCF_000445475.1	REF81MG2514	Free-living	100	34.891	2302023	2302023	93.12	2238	2238	271.5	22
GCF_000447205.1	REF81MG2515	Free-living	100	65.01	4754053	4754053	90.36	4566	4566	256	51
GCF_000447675.1	REF81MG2516	Free-living	100	36.899	2889325	2889325	88.88	2590	2590	285	60
GCF_000447755.1	REF81MG2517	Free-living	100	36.928	3650096	3650096	93.71	3417	3417	271	32
GCF_000447775.1	REF81MG2518	Free-living	100	37.64	2959076	2959076	94.1	2904	2904	250	33
GCF_000447795.1	REF81MG2519	Free-living	100	36.044	3450107	3450107	93.85	3319	3319	272	25
GCF_000018285.1	REF81MG252	Free-living	100	44.662	5174581	5174581	84.98	4358	4358	281	109
GCF_000447865.2	REF81MG2520	Free-living	100	67.671	2880902	2880902	86.83	2820	2820	263	98
GCF_000452245.2	REF81MG2521	Free-living	100	28.391	3604168	3604168	88.05	3510	3510	253	77
GCF_000454045.1	REF81MG2522	Free-living	100	62.453	6281198	6281198	92.13	5786	5786	290	50
GCF_000454065.1	REF81MG2523	Free-living	100	58.459	4433503	4433503	87.11	4247	4247	269	84
GCF_000454725.1	REF81MG2524	Obligate intracelullar parasite	100	38.318	1146066	1146066	91.14	961	961	297	47
GCF_000455165.1	REF81MG2525	Free-living	100	66.112	6135644	6135644	92.68	5898	5898	278	32
GCF_000455225.1	REF81MG2526	Free-living	100	48.855	2737487	2737487	86.1	2495	2495	271	51
GCF_000455245.1	REF81MG2527	Free-living	100	62.158	2672431	2672431	89.42	2499	2499	283	58
GCF_000455265.1	REF81MG2528	Free-living	100	48.997	5584690	5584690	86.14	5070	5070	281	82
GCF_000455325.1	REF81MG2529	Free-living	100	66.374	6908835	6908835	91.46	6593	6593	275	35
GCF_000018305.1	REF81MG253	Free-living	100	43.096	2077567	2077567	88.93	2075	2075	266	70
GCF_000455345.1	REF81MG2530	Free-living	100	66.061	3906364	3906364	85.67	3843	3843	251	100
GCF_000455365.1	REF81MG2531	Free-living	100	63.947	3776554	3776554	85.74	3704	3704	253.5	92
GCF_000455385.1	REF81MG2532	Free-living	100	65.968	7015674	7015674	89.2	6325	6325	269	71
GCF_000455445.1	REF81MG2533	Free-living	100	41.3	3217068	3217068	84.66	2676	2676	278.5	74
GCF_000455485.1	REF81MG2534	Free-living	100	50.386	5546433	5546433	88.2	5035	5035	277	90
GCF_000455525.1	REF81MG2535	Free-living	100	66.19	4211496	4211496	90.07	3913	3913	281	52
GCF_000455605.1	REF81MG2536	Free-living	100	31.384	2993089	2993089	92.1	2736	2736	270	51
GCF_000455825.1	REF81MG2537	Free-living	100	68.237	3944755	3944755	93.11	3802	3802	286	41
GCF_000463155.2	REF81MG2538	Free-living	100	57.855	4222803	4222803	88	3847	3847	274	75
GCF_000463345.1	REF81MG2539	Free-living	100	49.246	4944165	4944165	86.77	4413	4413	286	77
GCF_000018325.1	REF81MG254	Free-living	100	36.257	3123558	3123558	86.66	2972	2972	257	83
GCF_000463355.1	REF81MG2540	Free-living	100	37.557	1996214	1996214	88.52	1884	1884	255.5	62
GCF_000463505.1	REF81MG2541	Free-living	100	38.234	2233640	2233640	89.17	2190	2190	248	59
GCF_000463525.1	REF81MG2542	Free-living	100	59.032	3815107	3815107	90.11	3185	3185	300	72
GCF_000463665.1	REF81MG2543	Free-living	100	64.114	2117566	2117566	88.34	1875	1875	263	93
GCF_000465555.2	REF81MG2544	Free-living	100	57.809	4764584	4764584	88.67	4361	4361	287	70
GCF_000466165.1	REF81MG2545	Free-living	100	67.478	2366015	2366015	87.04	1967	1967	292	86.5
GCF_000466245.1	REF81MG2546	Free-living	100	67.327	3327711	3327711	88.33	2807	2807	287	89
GCF_000466465.2	REF81MG2547	Free-living	100	47.802	6640751	6640751	87.94	5579	5579	303	86
GCF_000466565.1	REF81MG2548	Free-living	100	44.102	3573774	3573774	89.86	3269	3269	277	64
GCF_000466585.1	REF81MG2549	Free-living	100	32.92	4767532	4767532	87.76	4599	4599	261	84
GCF_000018365.1	REF81MG255	Free-living	100	51.273	1847607	1847607	91.2	1993	1993	242	39
GCF_000466945.1	REF81MG2550	Free-living	100	61.271	4291514	4291514	91.11	4032	4032	268	52
GCF_000466965.1	REF81MG2551	Free-living	100	66.713	3896245	3896245	90.16	4057	4057	243	53
GCF_000466985.1	REF81MG2552	Free-living	100	68.159	2979231	2979231	90.23	3212	3212	222	43
GCF_000467065.1	REF81MG2553	Free-living	100	61.285	6329338	6329338	87.98	7033	7033	215	64
GCF_000467125.1	REF81MG2554	Free-living	100	50.014	4745050	4745050	88.77	4373	4373	275	73
GCF_000467935.1	REF81MG2555	Free-living	100	37.049	2088253	2088253	89.97	2015	2015	252	27
GCF_000468015.1	REF81MG2556	Free-living	100	48.672	3096487	3096487	87.62	2756	2756	262	57
GCF_000468055.1	REF81MG2557	Free-living	100	43.739	2340885	2340885	94.16	2041	2041	313	26
GCF_000468475.2	REF81MG2558	Free-living	100	72.036	10308866	10308866	90.02	9437	9437	283	55
GCF_000468495.1	REF81MG2559	Free-living	100	63.387	3693999	3693999	89.45	3249	3249	287	63
GCF_000018405.1	REF81MG256	Free-living	100	56.169	3944167	3944167	88.72	3313	3313	295	66
GCF_000468535.1	REF81MG2560	Free-living	100	30.98	1499757	1499757	91.48	1394	1394	278	28
GCF_000468615.2	REF81MG2561	Free-living	100	34.681	4635105	4635105	90.88	3967	3967	285	65
GCF_000468755.1	REF81MG2562	Free-living	100	64.172	2724935	2724935	88.33	2569	2569	270	65
GCF_000468855.1	REF81MG2563	Free-living	100	49.48	1801377	1801377	89.57	1551	1551	300	71
GCF_000469135.1	REF81MG2564	Free-living	100	46.757	3726330	3726330	88.75	3811	3811	256	69
GCF_000469155.1	REF81MG2565	Free-living	100	45.088	1957724	1957724	93.23	1894	1894	281.5	30
GCF_000469325.1	REF81MG2566	Free-living	100	55.921	3271684	3271684	86.89	2975	2975	276	73
GCF_000469345.1	REF81MG2567	Free-living	100	42.497	3447136	3447136	87.47	3076	3076	276.5	81
GCF_000469445.2	REF81MG2568	Free-living	100	59.236	3594235	3594235	86.35	3486	3486	244	58
GCF_000469465.1	REF81MG2569	Free-living	100	30.271	1604508	1604508	88.43	1480	1480	265.5	59
GCF_000018425.1	REF81MG257	Free-living	100	60.847	2349476	2349476	87.03	2290	2290	254.5	67
GCF_000469485.1	REF81MG2570	Free-living	100	70.168	4226099	4226099	92.7	4261	4261	238	43
GCF_000469545.1	REF81MG2571	Free-living	100	56.547	2313357	2313357	91.74	2111	2111	292	43
GCF_000469585.1	REF81MG2572	Free-living	100	50.042	2825161	2825161	93.56	2541	2541	281	21
GCF_000469625.2	REF81MG2573	Free-living	100	30.095	4677668	4677668	87.8	4745	4745	246	70
GCF_000469665.2	REF81MG2574	Free-living	100	35.193	1334604	1334604	76.99	1123	1123	211	115
GCF_000470655.1	REF81MG2575	Free-living	100	63.369	2815791	2815791	88.14	2828	2828	246.5	77
GCF_000470775.1	REF81MG2576	Free-living	100	68.345	2686418	2686418	87.19	2844	2844	229	55.5
GCF_000471025.2	REF81MG2577	Obligate intracelullar parasite	100	37.942	1059583	1059583	91.83	904	904	298.5	37
GCF_000471045.1	REF81MG2578	Free-living	100	70.484	3000939	3000939	92.88	2967	2967	271	33
GCF_000471625.1	REF81MG2579	Free-living	100	43.095	3216409	3216409	84.51	2694	2694	279	139
GCF_000018605.1	REF81MG258	Free-living	100	34.123	2169548	2169548	90.81	1979	1979	303	34
GCF_000471645.1	REF81MG2580	Free-living	100	36.605	1997090	1997090	83.91	1632	1632	273.5	97
GCF_000471965.1	REF81MG2581	Obligate intracellular symbiont	100	26.084	622952	622952	95.01	581	581	295	17
GCF_000472185.1	REF81MG2582	Free-living	100	49.734	3098293	3098293	91.02	3169	3169	263	46
GCF_000472285.1	REF81MG2583	Free-living	100	58.588	4402753	4402753	88.55	4057	4057	273	75
GCF_000472385.1	REF81MG2584	Free-living	100	62.008	8613869	8613869	84.07	8110	8110	258	108
GCF_000472425.1	REF81MG2585	Free-living	100	62.198	8496279	8496279	84.74	8016	8016	260	101
GCF_000472485.1	REF81MG2586	Free-living	100	53.138	4952578	4952578	86.38	4344	4344	270	104
GCF_000472505.1	REF81MG2587	Free-living	100	71.921	3401613	3401613	90.74	3028	3028	285.5	61
GCF_000472605.1	REF81MG2588	Free-living	100	29.202	1395018	1395018	96.85	1460	1460	280	4
GCF_000472665.1	REF81MG2589	Free-living	100	43.741	4050072	4050072	88.49	3674	3674	265	74
GCF_000018665.1	REF81MG259	Free-living	100	66.476	6767514	6767514	89.87	6115	6115	291	61
GCF_000472805.1	REF81MG2590	Free-living	100	41.232	3600571	3600571	88.42	3431	3431	247	52
GCF_000472865.1	REF81MG2591	Free-living	100	62.346	9902361	9902361	84.75	9468	9468	252	101
GCF_000472905.1	REF81MG2592	Free-living	100	53.685	3398558	3398558	86.07	3386	3386	256	88
GCF_000473085.1	REF81MG2593	Free-living	100	68.893	5817514	5817514	88.99	5218	5218	284	71
GCF_000473125.1	REF81MG2594	Free-living	100	63.551	9826880	9826880	83.94	9200	9200	263	105
GCF_000473145.1	REF81MG2595	Free-living	100	64.325	4642596	4642596	88.48	4302	4302	277	80
GCF_000473205.1	REF81MG2596	Free-living	100	59.266	5049234	5049234	88.31	4805	4805	265	77
GCF_000473225.1	REF81MG2597	Free-living	100	60.745	4948550	4948550	89.47	4807	4807	270	52
GCF_000473245.1	REF81MG2598	Free-living	100	46.033	4884713	4884713	85.38	4803	4803	253	97
GCF_000473305.1	REF81MG2599	Free-living	100	41.491	2657245	2657245	94.02	2279	2279	319	19
GCF_000008265.1	REF81MG26	Free-living	100	35.97	1545895	1545895	92.87	1587	1587	265	29
GCF_000018685.1	REF81MG260	Free-living	100	35.349	4847594	4847594	83.65	4077	4077	288	139
GCF_000473365.1	REF81MG2600	Free-living	100	39.638	5168091	5168091	85.15	4520	4520	270	106
GCF_000473895.1	REF81MG2601	Free-living	100	56.221	4153658	4153658	79.59	3625	3625	239	153
GCF_000473955.1	REF81MG2602	Free-living	100	38.326	3410817	3410817	89.81	2683	2683	316	71
GCF_000473995.1	REF81MG2603	Free-living	100	28.662	5107814	5107814	80.17	4393	4393	260	166
GCF_000474235.1	REF81MG2604	Free-living	100	67.384	2628974	2628974	87.71	2794	2794	227	64
GCF_000474745.1	REF81MG2605	Free-living	100	46.166	2585796	2585796	93.71	2293	2293	290	21
GCF_000474945.1	REF81MG2606	Free-living	100	68.457	4186503	4186503	91.08	3755	3755	288	54
GCF_000475255.1	REF81MG2607	Free-living	100	58.626	3556390	3556390	91.97	3284	3284	284	46
GCF_000475415.1	REF81MG2608	Free-living	100	67.671	3658104	3658104	91.27	3346	3346	278	63
GCF_000477415.1	REF81MG2609	Membrane asociated or intracellular parasite	100	26.975	564395	564395	61.05	1154	1154	73.5	121
GCF_000018785.1	REF81MG261	Membrane asociated or intracellular parasite	100	31.928	1496992	1496992	92.3	1389	1389	277	29
GCF_000477435.1	REF81MG2610	Free-living	100	59.089	2991840	2991840	90.6	2455	2455	295	64
GCF_000477555.1	REF81MG2611	Free-living	100	59.242	2775399	2775399	92.88	2701	2701	274	41
GCF_000478195.2	REF81MG2612	Free-living	100	41.155	6834603	6834603	85.39	5575	5575	259	126
GCF_000478585.1	REF81MG2613	Free-living	100	39.879	2725706	2725706	88.97	2466	2466	276	75
GCF_000478685.1	REF81MG2614	Free-living	100	31.083	1001444	1001444	87.85	904	904	275	78
GCF_000478785.1	REF81MG2615	Free-living	100	66.53	3288779	3288779	90.19	3058	3058	262	71.5
GCF_000478885.1	REF81MG2616	Free-living	100	63.459	2862526	2862526	85.79	2274	2274	302.5	96
GCF_000478905.1	REF81MG2617	Free-living	100	30.568	1151074	1151074	69.5	807	807	286	183
GCF_000478965.1	REF81MG2618	Free-living	100	49.786	2214431	2214431	90.09	2143	2143	267	35
GCF_000478985.1	REF81MG2619	Free-living	100	31.618	1925975	1925975	91.9	1870	1870	254	17
GCF_000018885.1	REF81MG262	Free-living	100	56.271	3155250	3155250	90.82	3519	3519	235	43
GCF_000479045.1	REF81MG2620	Free-living	100	28.548	3068248	3068248	93.39	2831	2831	282	30
GCF_000480335.1	REF81MG2621	Free-living	100	36.425	4369029	4369029	82.66	4115	4115	251	107
GCF_000482245.1	REF81MG2622	Free-living	100	48.049	8064168	8064168	85	7149	7149	255	112
GCF_000482325.1	REF81MG2623	Free-living	100	38.916	5605968	5605968	85.58	5452	5452	260	98
GCF_000482385.1	REF81MG2624	Free-living	100	65.078	5304668	5304668	87.91	4960	4960	260	75
GCF_000482465.1	REF81MG2625	Free-living	100	44.127	7555966	7555966	90.56	6220	6220	292	67
GCF_000482485.1	REF81MG2626	Free-living	100	35.753	4238191	4238191	84.85	4170	4170	247	97
GCF_000482545.1	REF81MG2627	Free-living	100	66.712	4660196	4660196	90.2	4098	4098	302	70
GCF_000482705.1	REF81MG2628	Free-living	100	70.05	5048579	5048579	88.27	4550	4550	282	74
GCF_000482725.1	REF81MG2629	Free-living	100	37.614	4745897	4745897	82.67	3999	3999	281	127
GCF_000018945.1	REF81MG263	Free-living	100	46.942	1884562	1884562	95.94	1908	1908	282	6
GCF_000482785.1	REF81MG2630	Free-living	100	69.871	5185168	5185168	89.35	4316	4316	303.5	72
GCF_000482805.1	REF81MG2631	Free-living	100	69.233	2767614	2767614	91.52	2660	2660	267	58
GCF_000482845.1	REF81MG2632	Free-living	100	43.477	3804739	3804739	74.11	2169	2169	326	344
GCF_000482865.1	REF81MG2633	Free-living	100	70.213	7278759	7278759	88.19	6329	6329	269	57
GCF_000483025.1	REF81MG2634	Free-living	100	44.492	2758640	2758640	83.81	2681	2681	207	123
GCF_000483125.1	REF81MG2635	Free-living	100	45.338	1657369	1657369	91.65	1482	1482	291	54
GCF_000483165.1	REF81MG2636	Membrane asociated or intracellular parasite	100	30.589	924993	924993	71.58	1782	1782	90	92
GCF_000483485.1	REF81MG2637	Free-living	100	48.029	2443034	2443034	90.08	2212	2212	281.5	74
GCF_000484505.1	REF81MG2638	Free-living	100	31.092	4352205	4352205	85.48	4060	4060	262	90.5
GCF_000484535.1	REF81MG2639	Free-living	100	60.537	4724791	4724791	90.05	4470	4470	263	55
GCF_000019165.1	REF81MG264	Free-living	100	56.975	3075407	3075407	87.38	2734	2734	274	90
GCF_000484595.1	REF81MG2640	Free-living	100	37.554	3479654	3479654	83.54	3390	3390	252	95
GCF_000484635.1	REF81MG2641	Free-living	100	65.964	3681020	3681020	92.29	3471	3471	283	43
GCF_000485555.1	REF81MG2642	Membrane asociated or intracellular parasite	100	26.437	713526	713526	73.16	1272	1272	98	94
GCF_000485815.1	REF81MG2643	Free-living	100	49.253	3180043	3180043	87.58	3059	3059	251	89
GCF_000485905.1	REF81MG2644	Free-living	100	63.857	1926631	1926631	95.35	1872	1872	286	16
GCF_000487995.1	REF81MG2645	Free-living	100	30.975	2332248	2332248	88.17	2123	2123	268	28
GCF_000488195.1	REF81MG2646	Free-living	100	39.767	4551346	4551346	83.63	4240	4240	255	82
GCF_000488215.1	REF81MG2647	Free-living	100	36.663	2668938	2668938	88.84	2527	2527	259	64
GCF_000488255.1	REF81MG2648	Free-living	100	45.393	3211639	3211639	86.98	2982	2982	262	91
GCF_000488275.1	REF81MG2649	Free-living	100	41.689	3148512	3148512	86.84	2925	2925	265	75
GCF_000019205.1	REF81MG265	Free-living	100	29.703	1525460	1525460	95.49	1533	1533	260	7
GCF_000488855.1	REF81MG2650	Free-living	100	37.889	1544525	1544525	88.45	1385	1385	266	73
GCF_000492175.1	REF81MG2651	Free-living	100	58.045	3704572	3704572	86.33	3532	3532	253	67
GCF_000493735.1	REF81MG2652	Free-living	100	35.261	2347813	2347813	85.68	2155	2155	272	104
GCF_000493885.1	REF81MG2653	Obligate intracelullar parasite	100	41.991	1073707	1073707	90.13	908	908	291.5	51
GCF_000494755.1	REF81MG2654	Free-living	100	70.355	9376071	9376071	91.35	8673	8673	280	43
GCF_000495255.1	REF81MG2655	Obligate intracelullar parasite	100	27.14	611462	611462	74.43	549	549	206	123.5
GCF_000495435.3	REF81MG2656	Free-living	100	46.567	3988233	3988233	90.41	3756	3756	273	54
GCF_000495475.1	REF81MG2657	Free-living	100	70.118	3675087	3675087	85.39	3442	3442	263	103
GCF_000495505.1	REF81MG2658	Free-living	100	33.123	1775480	1775480	93.43	1723	1723	271	10
GCF_000495815.1	REF81MG2659	Free-living	100	58.845	4695073	4695073	90.18	4216	4216	278	73
GCF_000019225.1	REF81MG266	Free-living	100	51.991	4576573	4576573	90.97	3686	3686	298.5	67
GCF_000495855.1	REF81MG2660	Free-living	100	60.668	4153754	4153754	88.94	3780	3780	265	80
GCF_000495935.2	REF81MG2661	Free-living	100	35.622	4369828	4369828	89.88	4039	4039	264	64
GCF_000496075.1	REF81MG2662	Free-living	100	68.585	4300776	4300776	90.77	4053	4053	281	57
GCF_000496475.1	REF81MG2663	Free-living	100	53.612	2859706	2859706	90.73	2683	2683	288	53
GCF_000496595.1	REF81MG2664	Free-living	100	31.114	1195201	1195201	79.49	983	983	265	130
GCF_000496735.2	REF81MG2665	Free-living	100	47.314	4136943	4136943	88.61	3774	3774	251.5	67
GCF_000496755.2	REF81MG2666	Free-living	100	49.163	5273532	5273532	86.52	4595	4595	276	92
GCF_000496835.1	REF81MG2667	Free-living	100	42.776	3935133	3935133	86.45	3878	3878	261	84
GCF_000496855.1	REF81MG2668	Free-living	100	44.025	3985996	3985996	83.31	3882	3882	254	109
GCF_000497205.1	REF81MG2669	Free-living	100	68.934	3965418	3965418	87.81	3693	3693	271	73
GCF_000019285.1	REF81MG267	Obligate intracelullar parasite	100	32.573	2045775	2045775	92.85	1966	1966	285.5	32
GCF_000497245.1	REF81MG2670	Free-living	100	42.724	3590176	3590176	84.73	3514	3514	254	102
GCF_000497405.1	REF81MG2671	Free-living	100	68.121	5961647	5961647	82.66	5356	5356	263	94
GCF_000497425.1	REF81MG2672	Free-living	100	69.476	8514960	8514960	86.15	7601	7601	282	83
GCF_000497445.1	REF81MG2673	Free-living	100	68.798	9663240	9663240	83.57	8825	8825	262	97
GCF_000497755.1	REF81MG2674	Free-living	100	64.376	4142519	4142519	90.67	4058	4058	267	56
GCF_000498295.1	REF81MG2675	Free-living	100	37.656	1829043	1829043	91.33	1729	1729	278	47
GCF_000498355.1	REF81MG2676	Free-living	100	26.74	3111375	3111375	88.6	3017	3017	260	73
GCF_000498475.1	REF81MG2677	Free-living	100	38.173	3113956	3113956	91.65	2878	2878	264	59
GCF_000498495.1	REF81MG2678	Free-living	100	37.731	3387090	3387090	89.92	3035	3035	269	67
GCF_000498575.2	REF81MG2679	Free-living	100	60.918	5454863	5454863	87.91	4903	4903	284	87
GCF_000019345.1	REF81MG268	Membrane asociated or intracellular parasite	100	25.497	751679	751679	70.6	1259	1259	100	100
GCF_000498955.2	REF81MG2680	Free-living	100	45.03	3275891	3275891	84.85	3115	3115	251	88
GCF_000499525.1	REF81MG2681	Free-living	100	27.966	3727512	3727512	88	3731	3731	244	88
GCF_000499765.1	REF81MG2682	Free-living	100	39.742	2029766	2029766	83.77	2014	2014	241	111
GCF_000499785.1	REF81MG2683	Free-living	100	43.54	5025334	5025334	91.19	4369	4369	287	43
GCF_000500045.1	REF81MG2684	Free-living	100	28.927	1762626	1762626	85.3	1699	1699	230	56.5
GCF_000500065.1	REF81MG2685	Free-living	100	28.064	1780770	1780770	88.69	1727	1727	246	36
GCF_000500935.1	REF81MG2686	Obligate intracellular symbiont	100	28.304	1160554	1160554	70.08	1961	1961	105	94
GCF_000503775.1	REF81MG2687	Free-living	100	50.132	5545940	5545940	89.14	5390	5390	271	70
GCF_000503895.1	REF81MG2688	Free-living	100	63.884	3653837	3653837	86.64	3416	3416	258	95
GCF_000504125.1	REF81MG2689	Free-living	100	38.612	3022186	3022186	85.71	2850	2850	254	81
GCF_000019365.1	REF81MG269	Free-living	100	71.583	7659055	7659055	83.27	6893	6893	265	111
GCF_000504145.1	REF81MG2690	Free-living	100	37.024	5443019	5443019	76.79	5039	5039	244	168
GCF_000504165.1	REF81MG2691	Free-living	100	40.931	5569389	5569389	81.73	5283	5283	257	140
GCF_000504185.2	REF81MG2692	Free-living	100	66.102	5088592	5088592	87.59	4766	4766	277	84
GCF_000504205.1	REF81MG2693	Free-living	100	39.79	3151883	3151883	88.09	2950	2950	256	73
GCF_000504225.1	REF81MG2694	Free-living	100	29.147	1395997	1395997	96.96	1463	1463	278	4
GCF_000504245.1	REF81MG2695	Free-living	100	67.75	5551297	5551297	89.47	5098	5098	285	66.5
GCF_000504285.1	REF81MG2696	Free-living	100	70.257	9918887	9918887	86.83	8575	8575	285	85
GCF_000504425.1	REF81MG2697	Free-living	100	64.183	4068467	4068467	85.7	3689	3689	267	109
GCF_000505545.1	REF81MG2698	Free-living	100	39.912	3548086	3548086	87.33	3476	3476	253	81
GCF_000506865.1	REF81MG2699	Free-living	100	38.915	2504912	2504912	90.05	2631	2631	232	49
GCF_000008325.1	REF81MG27	Free-living	100	63.585	3304561	3304561	91.17	3042	3042	269.5	36
GCF_000019405.1	REF81MG270	Free-living	100	37.378	2263857	2263857	89.93	2067	2067	257	66
GCF_000507245.1	REF81MG2700	Free-living	100	51.86	3782798	3782798	91.06	3274	3274	305	62
GCF_000507845.1	REF81MG2701	Free-living	100	40.414	2369528	2369528	85.61	1943	1943	297	97
GCF_000507865.1	REF81MG2702	Free-living	100	44.819	1932823	1932823	93.03	1792	1792	281	24
GCF_000508165.1	REF81MG2703	Free-living	100	44.786	3832790	3832790	90.39	3549	3549	288	73
GCF_000508185.1	REF81MG2704	Free-living	100	63.896	4776116	4776116	91.23	4524	4524	263	52
GCF_000508225.1	REF81MG2705	Obligate intracelullar parasite	100	29.664	1196717	1196717	75.34	929	929	261	187.5
GCF_000508245.1	REF81MG2706	Membrane asociated or intracellular parasite	100	31.692	702511	702511	58.52	1311	1311	78	133
GCF_000508325.2	REF81MG2707	Free-living	100	39.739	5283235	5283235	86.7	5129	5129	258	98
GCF_000509225.1	REF81MG2708	Free-living	100	55.411	3824226	3824226	90.62	3719	3719	269	63
GCF_000509365.1	REF81MG2709	Free-living	100	37.897	2155647	2155647	89.79	2123	2123	250	33
GCF_000019485.1	REF81MG271	Free-living	100	49.631	3008047	3008047	88.44	2845	2845	264	85
GCF_000509405.1	REF81MG2710	Free-living	100	31.805	3225035	3225035	90.91	2853	2853	267	59
GCF_000510265.1	REF81MG2711	Obligate intracellular symbiont	100	34.531	1518636	1518636	56.24	792	792	289	513
GCF_000510425.1	REF81MG2712	Free-living	100	38.101	1829558	1829558	89.9	1634	1634	277.5	54
GCF_000510645.1	REF81MG2713	Free-living	100	48.2	3657623	3657623	87.31	3514	3514	263	75
GCF_000510805.1	REF81MG2714	Free-living	100	40.152	2459805	2459805	83.64	1989	1989	293	147
GCF_000511135.2	REF81MG2715	Free-living	100	71.184	8538433	8538433	86.55	7831	7831	278	77
GCF_000511175.1	REF81MG2716	Free-living	100	38.578	3246830	3246830	90.68	2929	2929	279	35
GCF_000511305.1	REF81MG2717	Free-living	100	67.985	5227080	5227080	90.66	4795	4795	281	58
GCF_000511355.1	REF81MG2718	Free-living	100	62.369	4144900	4144900	86.76	4005	4005	258	83
GCF_000511385.1	REF81MG2719	Free-living	100	59.625	3776653	3776653	89.24	3621	3621	272	77
GCF_000019525.1	REF81MG272	Free-living	100	43.701	5935403	5935403	86.39	4995	4995	277	99
GCF_000511405.1	REF81MG2720	Free-living	100	44.982	4046337	4046337	84.37	3993	3993	242	91
GCF_000511655.1	REF81MG2721	Free-living	100	44.77	3066842	3066842	83.96	2570	2570	277.5	143
GCF_000511775.1	REF81MG2722	Free-living	100	46.22	3379354	3379354	87.58	3292	3292	241	54.5
GCF_000511875.1	REF81MG2723	Free-living	100	50.022	2605026	2605026	90.64	2331	2331	288	66
GCF_000511935.2	REF81MG2724	Free-living	100	36.735	3787699	3787699	90.94	3274	3274	286	66
GCF_000511955.1	REF81MG2725	Free-living	100	31.495	3216692	3216692	84.25	3044	3044	257.5	59
GCF_000512205.2	REF81MG2726	Free-living	100	66.781	6205897	6205897	90.61	5754	5754	276	53
GCF_000512235.1	REF81MG2727	Free-living	100	51.933	3759482	3759482	87.56	3614	3614	256	49
GCF_000512355.1	REF81MG2728	Free-living	100	40.878	2722964	2722964	88.93	2886	2886	229.5	64
GCF_000512735.1	REF81MG2729	Free-living	100	45.192	1521037	1521037	96.02	1614	1614	257.5	3
GCF_000019605.1	REF81MG273	Free-living	100	49.001	1590757	1590757	91.81	1674	1674	256	21
GCF_000512895.1	REF81MG2730	Free-living	100	44.561	2943336	2943336	86.41	2822	2822	255.5	91
GCF_000512915.1	REF81MG2731	Free-living	100	51.67	3076856	3076856	89.59	2492	2492	314	64
GCF_000513095.1	REF81MG2732	Free-living	100	38.288	4530938	4530938	86.12	4731	4731	234	86
GCF_000513115.1	REF81MG2733	Free-living	100	38.178	4538064	4538064	86.05	4466	4466	249	86
GCF_000513135.1	REF81MG2734	Free-living	100	37.021	4740369	4740369	85.51	4877	4877	236	94
GCF_000513215.1	REF81MG2735	Free-living	100	59.512	5113802	5113802	88.24	4674	4674	282	70
GCF_000513275.1	REF81MG2736	Free-living	100	48.8	6257966	6257966	87.58	5774	5774	271	81
GCF_000513295.1	REF81MG2737	Free-living	100	63.285	4365796	4365796	91.36	4106	4106	262	37
GCF_000513315.1	REF81MG2738	Free-living	100	25.517	2221920	2221920	73.98	2002	2002	221	212
GCF_000513475.1	REF81MG2739	Obligate intracelullar parasite	100	27.381	1118422	1118422	88.44	980	980	282	82
GCF_000019665.1	REF81MG274	Free-living	100	45.483	2287145	2287145	89.32	2101	2101	275	55
GCF_000513775.1	REF81MG2740	Free-living	100	39.974	3250767	3250767	83.75	2764	2764	282	75
GCF_000513955.1	REF81MG2741	Free-living	100	70.56	3346704	3346704	89.85	2976	2976	278	71
GCF_000513975.1	REF81MG2742	Free-living	100	68.024	4294957	4294957	90.52	4096	4096	281	49
GCF_000515115.1	REF81MG2743	Free-living	100	71.04	4681465	4681465	86.57	4212	4212	269	89
GCF_000515255.1	REF81MG2744	Free-living	100	65.986	4176524	4176524	87.57	3787	3787	286	91.5
GCF_000515275.1	REF81MG2745	Free-living	100	50.246	3033021	3033021	90.7	2820	2820	271	54
GCF_000515315.1	REF81MG2746	Free-living	100	45.44	3715967	3715967	93.26	3254	3254	293	40.5
GCF_000515335.1	REF81MG2747	Free-living	100	54.47	4772825	4772825	88.42	4378	4378	279	69
GCF_000515395.1	REF81MG2748	Free-living	100	70.912	5585780	5585780	90.64	5155	5155	289	54
GCF_000516515.1	REF81MG2749	Free-living	100	53.923	4890986	4890986	84.86	3958	3958	299	82
GCF_000019685.1	REF81MG275	Free-living	100	27.586	931674	931674	93.99	835	835	306	19
GCF_000516535.1	REF81MG2750	Free-living	100	31.632	2281162	2281162	90.53	2235	2235	265	42
GCF_000516555.1	REF81MG2751	Free-living	100	63.487	5085524	5085524	87.01	4764	4764	273	97
GCF_000517025.1	REF81MG2752	Free-living	100	33.333	2884521	2884521	83.31	2661	2661	252	111
GCF_000517065.1	REF81MG2753	Free-living	100	42.665	4122270	4122270	87.37	3289	3289	300	89
GCF_000517085.1	REF81MG2754	Free-living	100	37.552	5982061	5982061	86.87	4717	4717	307	92
GCF_000517105.1	REF81MG2755	Free-living	100	42.599	8079181	8079181	79.48	7045	7045	240	151
GCF_000517385.1	REF81MG2756	Free-living	100	42.023	4364535	4364535	84.37	5305	5305	185	78
GCF_000517425.1	REF81MG2757	Free-living	100	57.474	4709528	4709528	83.76	4107	4107	282	99
GCF_000517445.1	REF81MG2758	Free-living	100	40.297	1957742	1957742	92.13	2130	2130	245.5	34
GCF_000517545.1	REF81MG2759	Free-living	100	43.264	5365278	5365278	88.9	5053	5053	251	44
GCF_000019725.1	REF81MG276	Free-living	100	71.502	6077833	6077833	86.66	5728	5728	267	88
GCF_000517565.1	REF81MG2760	Free-living	100	32.075	1816487	1816487	94.92	1846	1846	271.5	6
GCF_000517605.1	REF81MG2761	Free-living	100	61.101	4854518	4854518	86.92	4681	4681	264	93
GCF_000517625.1	REF81MG2762	Free-living	100	61.947	2789326	2789326	85.84	2866	2866	240	103
GCF_000518205.1	REF81MG2763	Free-living	100	41.389	2067037	2067037	90.37	1918	1918	278	53
GCF_000518225.1	REF81MG2764	Free-living	100	40.078	1435066	1435066	95.02	1366	1366	278	10
GCF_000518245.1	REF81MG2765	Free-living	100	26.795	3420763	3420763	88.93	3209	3209	270	65
GCF_000518265.1	REF81MG2766	Free-living	100	71.97	9353665	9353665	87.89	8229	8229	282	84
GCF_000518285.1	REF81MG2767	Membrane asociated or intracellular parasite	100	30.048	1103092	1103092	70.29	2074	2074	89	86
GCF_000518305.1	REF81MG2768	Membrane asociated or intracellular parasite	100	30.444	922439	922439	72.93	1475	1475	112	91
GCF_000518365.1	REF81MG2769	Free-living	100	66.686	6646877	6646877	89.94	6344	6344	283	52
GCF_000019745.1	REF81MG277	Obligate intracellular symbiont	100	45.557	1560469	1560469	90.09	1911	1911	189	35
GCF_000518485.1	REF81MG2770	Free-living	100	31.797	3343709	3343709	91.72	3042	3042	274	57
GCF_000518585.1	REF81MG2771	Free-living	100	57.198	5163333	5163333	88.34	4857	4857	277	77
GCF_000518665.1	REF81MG2772	Free-living	100	64.265	4029781	4029781	88.66	3821	3821	269	74.5
GCF_000518685.1	REF81MG2773	Free-living	100	39.768	2579248	2579248	91.66	2138	2138	305.5	39
GCF_000518705.1	REF81MG2774	Free-living	100	45.345	4575622	4575622	87.89	4056	4056	271	86
GCF_000518745.1	REF81MG2775	Free-living	100	44.337	2746431	2746431	82.97	2428	2428	260	86
GCF_000518765.1	REF81MG2776	Free-living	100	43.101	3587803	3587803	87.7	3072	3072	276	59
GCF_000518785.1	REF81MG2777	Free-living	100	63.493	4976687	4976687	88.24	4691	4691	277	77
GCF_000518805.1	REF81MG2778	Free-living	100	45.232	4971480	4971480	87.72	4366	4366	270	84
GCF_000518825.1	REF81MG2779	Membrane asociated or intracellular parasite	100	26.812	843889	843889	69.85	1524	1524	90	94
GCF_000019785.1	REF81MG278	Free-living	100	68.9	4909403	4909403	91.97	4350	4350	299	43
GCF_000518865.1	REF81MG2780	Free-living	100	36.048	5335054	5335054	86.11	5151	5151	260	105
GCF_000518985.1	REF81MG2781	Free-living	100	61.22	4700340	4700340	89.9	4540	4540	275	60.5
GCF_000519005.1	REF81MG2782	Free-living	100	72.292	4754646	4754646	92.26	4481	4481	286	35
GCF_000519045.1	REF81MG2783	Free-living	100	62.798	3627226	3627226	92.56	3434	3434	273	26
GCF_000519105.1	REF81MG2784	Free-living	100	42.281	4717857	4717857	91.75	3869	3869	317	57
GCF_000519125.1	REF81MG2785	Free-living	100	69.685	3627185	3627185	88.86	3250	3250	278	62.5
GCF_000519205.1	REF81MG2786	Free-living	100	68.355	8777509	8777509	88.18	8336	8336	266.5	68
GCF_000519265.1	REF81MG2787	Free-living	100	59.325	3761451	3761451	88.73	3320	3320	285	63
GCF_000519325.1	REF81MG2788	Free-living	100	74.029	5521807	5521807	89.17	5047	5047	285	72
GCF_000519345.1	REF81MG2789	Free-living	100	68.57	4765806	4765806	80.31	4837	4837	218	99
GCF_000019845.1	REF81MG279	Free-living	100	57.06	4170153	4170153	84.45	3759	3759	269	114
GCF_000520015.2	REF81MG2790	Free-living	100	50.879	5488183	5488183	86.75	4900	4900	271	78
GCF_000520495.1	REF81MG2791	Free-living	100	61.622	4266129	4266129	86.01	4323	4323	243	75
GCF_000520515.1	REF81MG2792	Free-living	100	62.582	3436756	3436756	88.44	3348	3348	260.5	61
GCF_000520555.1	REF81MG2793	Free-living	100	65.621	3544125	3544125	87.69	3429	3429	263	69.5
GCF_000520595.1	REF81MG2794	Free-living	100	62.056	4325474	4325474	88.32	4377	4377	250	59
GCF_000520615.1	REF81MG2795	Free-living	100	67.459	4638423	4638423	88.92	4316	4316	272	71
GCF_000520955.1	REF81MG2796	Free-living	100	33.487	5253982	5253982	87.32	4306	4306	271	90
[truncated: 4,317 more rows]

## Sheet: Table_S8
Back to index
Supplementary Table 8. Basic statistics for the manually curated SPC database used in this study.
RefSeq assembly accession	Local file name	Genome_completeness	GC	Genome_size_COG	Genome_size_COG_r	Coding density	TOTAL_CDS	Total_CDS_estimation	MEDIAN_INTERGENIC_SPACER
GCF_000012565.1	REF81MG102	100	28.958	1315030	1315030	73	970	970	232
GCF_000217635.1	REF81MG1043	100	23.032	444925	444925	82.3	394	394	105
GCF_000219175.1	REF81MG1060	100	43.519	538294	538294	80.65	438	438	141
GCF_000219355.1	REF81MG1061	100	36.554	1183732	1183732	79.24	1368	1368	67
GCF_000221305.1	REF81MG1082	100	26.64	928687	928687	70.6	1526	1526	109
GCF_000224105.1	REF81MG1097	100	26.939	832603	832603	64.19	1381	1381	124
GCF_000012765.1	REF81MG110	100	23.77	1010023	1010023	63.02	1618	1618	134
GCF_000225445.1	REF81MG1108	100	25.658	641794	641794	88.5	581	581	70
GCF_000225465.1	REF81MG1109	100	24.136	615380	615380	87.57	541	541	73
GCF_000227355.1	REF81MG1123	100	24.474	1195147	1195147	71.25	2029	2029	108
GCF_000233435.1	REF81MG1151	100	27.479	587248	587248	95.5	545	545	14
GCF_000236085.2	REF81MG1172	100	27.026	1260174	1260174	63.21	2190	2190	115
GCF_000236405.1	REF81MG1174	100	23.847	605745	605745	92.88	549	549	27
GCF_000238995.1	REF81MG1199	100	35.334	919992	919992	62.97	2000	2000	102
GCF_000007365.1	REF81MG12	100	25.331	641454	641454	89.09	600	600	66.5
GCF_000013125.1	REF81MG121	100	41.636	1471282	1471282	72.16	1241	1241	167
GCF_000013145.1	REF81MG122	100	30.101	1176248	1176248	78.32	927	927	187.5
GCF_000013165.1	REF81MG123	100	41.084	859006	859006	85.79	780	780	96
GCF_000013185.1	REF81MG124	100	33.235	686194	686194	88.31	606	606	65
GCF_000247565.1	REF81MG1265	100	25.224	719535	719535	87.85	648	648	60.5
GCF_000253015.1	REF81MG1284	100	35.727	1522743	1522743	81.64	1247	1247	113
GCF_000255355.1	REF81MG1296	100	32.2	1369927	1369927	81.42	1603	1603	113.5
GCF_000257395.1	REF81MG1303	100	38.888	1727973	1727973	80.15	2260	2260	60.5
GCF_000258345.2	REF81MG1307	100	40.454	1793760	1793760	87.63	1716	1716	56
GCF_000262715.1	REF81MG1331	100	25.672	629165	629165	95.59	576	576	15
GCF_000273375.1	REF81MG1374	100	37.109	1834009	1834009	78.15	1618	1618	112
GCF_000277795.1	REF81MG1381	100	33.922	650228	650228	56.56	1214	1214	130
GCF_000278135.1	REF81MG1382	100	37.417	1970822	1970822	77.03	1703	1703	109
GCF_000278155.1	REF81MG1383	100	37.663	1810183	1810183	80.6	1560	1560	112
GCF_000278215.1	REF81MG1384	100	35.078	2170653	2170653	70.47	1744	1744	121
GCF_000278295.1	REF81MG1385	100	36.758	2015681	2015681	75.65	1720	1720	107
GCF_000279995.1	REF81MG1387	100	37.811	2254945	2254945	82.58	1971	1971	114
GCF_000280015.1	REF81MG1388	100	36.27	1673902	1673902	76.29	1370	1370	115
GCF_000283595.1	REF81MG1401	100	32.35	1283087	1283087	81.42	1447	1447	117
GCF_000283855.1	REF81MG1404	100	32.605	1263719	1263719	80.94	1443	1443	110
GCF_000284075.1	REF81MG1407	100	32.406	1290368	1290368	81.39	1491	1491	108.5
GCF_000284155.1	REF81MG1410	100	32.284	1323280	1323280	80.12	1477	1477	125
GCF_000294715.1	REF81MG1446	100	38.757	1587646	1587646	75.5	1345	1345	122.5
GCF_000300295.3	REF81MG1497	100	39.727	3184851	3184851	83.93	3188	3188	92
GCF_000007605.1	REF81MG15	100	39.223	1173390	1173390	90.94	989	989	48
GCF_000300695.1	REF81MG1501	100	27.167	575344	575344	89.68	535	535	59
GCF_000304455.1	REF81MG1517	100	36.623	887130	887130	85.62	773	773	106.5
GCF_000306885.1	REF81MG1527	100	32.07	957990	957990	70.39	797	797	107
GCF_000309075.1	REF81MG1558	100	29.047	1469252	1469252	87.64	1291	1291	95
GCF_000014345.1	REF81MG156	100	31.054	1159772	1159772	75.49	1063	1063	155.5
GCF_000309465.1	REF81MG1561	100	27.356	618193	618193	91.01	573	573	54
GCF_000309485.1	REF81MG1562	100	27.489	574828	574828	89.97	510	510	56
GCF_000312525.1	REF81MG1589	100	37.257	2043276	2043276	77.84	1794	1794	104
GCF_000312545.1	REF81MG1590	100	37.728	1998234	1998234	72.8	1662	1662	115
GCF_000312565.1	REF81MG1591	100	38.795	2158264	2158264	77.16	1866	1866	120
GCF_000313635.1	REF81MG1597	100	25.892	836897	836897	65.17	1474	1474	118
GCF_000319245.1	REF81MG1648	100	32.546	820037	820037	91.54	738	738	44
GCF_000319365.1	REF81MG1649	100	35.523	513880	513880	64.1	964	964	112
GCF_000319385.1	REF81MG1650	100	34.145	1481191	1481191	57.83	788	788	486.5
GCF_000327395.1	REF81MG1664	100	24.082	1011147	1011147	66.02	1624	1624	138
GCF_000328725.1	REF81MG1673	100	25.7	998123	998123	66.79	1570	1570	127
GCF_000331595.1	REF81MG1690	100	33.294	1240904	1240904	86.84	1132	1132	75
GCF_000334405.1	REF81MG1726	100	28.185	634449	634449	94.16	586	586	19.5
GCF_000340795.1	REF81MG1767	100	30.174	833125	833125	91.63	741	741	44
GCF_000340825.1	REF81MG1768	100	30.963	821930	821930	91.88	731	731	43
GCF_000340865.1	REF81MG1769	100	31.23	810172	810172	89.67	708	708	47
GCF_000015105.1	REF81MG177	100	34.033	1160782	1160782	82.11	1127	1127	38
GCF_000340905.1	REF81MG1771	100	32.359	822140	822140	91.71	734	734	46
GCF_000341355.1	REF81MG1784	100	41.84	1596490	1596490	81.39	1364	1364	109
GCF_000341385.1	REF81MG1785	100	38.831	1802699	1802699	81.03	1643	1643	105
GCF_000007725.1	REF81MG18	100	25.341	615980	615980	83.03	521	521	105
GCF_000348805.1	REF81MG1812	100	26.408	632490	632490	95.36	581	581	17
GCF_000364425.1	REF81MG1840	100	24.35	562473	562473	76.07	478	478	108
GCF_000367445.1	REF81MG1848	100	25.567	771940	771940	69.25	1235	1235	118
GCF_000367765.1	REF81MG1850	100	27.235	767867	767867	69.79	1279	1279	113
GCF_000367805.1	REF81MG1851	100	28.968	862312	862312	72.6	1463	1463	100.5
GCF_000015445.1	REF81MG188	100	38.239	1445021	1445021	82.27	1233	1233	118
GCF_000376585.1	REF81MG1941	100	34.011	1301823	1301823	87.46	1220	1220	75
GCF_000384965.1	REF81MG2093	100	37.321	1624667	1624667	82.15	1383	1383	103
GCF_000385435.1	REF81MG2098	100	37.83	1619143	1619143	82.6	1392	1392	100
GCF_000400935.1	REF81MG2115	100	28.799	1123322	1123322	66.45	1936	1936	110
GCF_000400955.1	REF81MG2116	100	29.201	1107344	1107344	67.08	1930	1930	109
GCF_000420105.1	REF81MG2179	100	25.363	710549	710549	72.28	1211	1211	97
GCF_000008025.1	REF81MG23	100	35.235	1267782	1267782	84.49	1271	1271	69
GCF_000008045.1	REF81MG24	100	28.919	1111496	1111496	76.31	865	865	131.5
GCF_000428705.1	REF81MG2414	100	27.978	1807123	1807123	93.29	1624	1624	24
GCF_000439435.1	REF81MG2496	100	23.873	1075140	1075140	67.53	1978	1978	100
GCF_000439455.1	REF81MG2497	100	25.459	945296	945296	71.07	1763	1763	92.5
GCF_000441555.1	REF81MG2498	100	24.241	459399	459399	89.08	356	356	61
GCF_000008205.1	REF81MG25	100	28.522	897405	897405	65.86	1334	1334	130
GCF_000018205.1	REF81MG250	100	32.335	1231060	1231060	78.85	1308	1308	126
GCF_000454725.1	REF81MG2524	100	38.318	1146066	1146066	91.14	961	961	47
GCF_000471025.2	REF81MG2577	100	37.942	1059583	1059583	91.83	904	904	37
GCF_000471965.1	REF81MG2581	100	26.084	622952	622952	95.01	581	581	17
GCF_000477415.1	REF81MG2609	100	26.975	564395	564395	61.05	1154	1154	121
GCF_000018785.1	REF81MG261	100	31.928	1496992	1496992	92.3	1389	1389	29
GCF_000483165.1	REF81MG2636	100	30.589	924993	924993	71.58	1782	1782	92
GCF_000485555.1	REF81MG2642	100	26.437	713526	713526	73.16	1272	1272	94
GCF_000493885.1	REF81MG2653	100	41.991	1073707	1073707	90.13	908	908	51
GCF_000495255.1	REF81MG2655	100	27.14	611462	611462	74.43	549	549	123.5
GCF_000019285.1	REF81MG267	100	32.573	2045775	2045775	92.85	1966	1966	32
GCF_000019345.1	REF81MG268	100	25.497	751679	751679	70.6	1259	1259	100
GCF_000500935.1	REF81MG2686	100	28.304	1160554	1160554	70.08	1961	1961	94
GCF_000508225.1	REF81MG2705	100	29.664	1196717	1196717	75.34	929	929	187.5
GCF_000508245.1	REF81MG2706	100	31.692	702511	702511	58.52	1311	1311	133
GCF_000510265.1	REF81MG2711	100	34.531	1518636	1518636	56.24	792	792	513
GCF_000513475.1	REF81MG2739	100	27.381	1118422	1118422	88.44	980	980	82
GCF_000518285.1	REF81MG2767	100	30.048	1103092	1103092	70.29	2074	2074	86
GCF_000518305.1	REF81MG2768	100	30.444	922439	922439	72.93	1475	1475	91
GCF_000019745.1	REF81MG277	100	45.557	1560469	1560469	90.09	1911	1911	35
GCF_000518825.1	REF81MG2779	100	26.812	843889	843889	69.85	1524	1524	94
GCF_000521565.1	REF81MG2802	100	25.44	643517	643517	89.99	587	587	70
GCF_000524555.1	REF81MG2810	100	28.217	760240	760240	72.6	1311	1311	94
GCF_000526235.1	REF81MG2824	100	29.4	1453539	1453539	92.53	1330	1330	25.5
GCF_000526835.1	REF81MG2842	100	27.959	864731	864731	68.72	1617	1617	88
GCF_000526855.1	REF81MG2843	100	29.807	1022566	1022566	70.31	1894	1894	94
GCF_000526955.1	REF81MG2845	100	23.985	847750	847750	70.54	1416	1416	105
GCF_000565175.1	REF81MG2859	100	26.362	1175131	1175131	70.09	2269	2269	97
GCF_000020065.1	REF81MG286	100	30.709	820453	820453	70.79	1269	1269	106
GCF_000565195.1	REF81MG2860	100	29.412	1132608	1132608	63.34	1932	1932	115
GCF_000565215.1	REF81MG2861	100	30.164	1075953	1075953	71.93	1895	1895	94
GCF_000583875.1	REF81MG2885	100	36.916	1041170	1041170	91.16	945	945	40
GCF_000008365.1	REF81MG29	100	24.951	777079	777079	73.42	1287	1287	91
GCF_000020305.1	REF81MG291	100	49.774	1202435	1202435	87.15	1015	1015	95
GCF_000620005.1	REF81MG2967	100	27.115	835846	835846	71.13	1398	1398	110
GCF_000621085.1	REF81MG2994	100	26.301	834674	834674	70.94	1463	1463	97.5
GCF_000008385.1	REF81MG30	100	34.179	1080084	1080084	74.37	1136	1136	112
GCF_000622165.1	REF81MG3017	100	24.815	842941	842941	70.61	1431	1431	97
GCF_000622205.1	REF81MG3019	100	24.712	901123	901123	69.04	1441	1441	116
GCF_000632845.1	REF81MG3035	100	29.649	1148904	1148904	76.94	907	907	190
GCF_000632985.1	REF81MG3036	100	41.693	884232	884232	88.44	839	839	77
GCF_000685885.1	REF81MG3059	100	26.465	822890	822890	64.26	1479	1479	112
GCF_000685905.1	REF81MG3060	100	24.182	839829	839829	70.31	1562	1562	97
GCF_000686545.1	REF81MG3066	100	30.147	916605	916605	72.31	1673	1673	87
GCF_000686585.1	REF81MG3068	100	25.186	778716	778716	71.7	1350	1350	93
GCF_000687735.1	REF81MG3086	100	29.642	1282372	1282372	93.49	1176	1176	19
GCF_000687775.1	REF81MG3087	100	28.149	764934	764934	72.29	1269	1269	104
GCF_000687795.1	REF81MG3088	100	31.548	1325910	1325910	72.08	2222	2222	97
GCF_000687815.1	REF81MG3089	100	25.668	769819	769819	74.99	1325	1325	88
GCF_000687835.1	REF81MG3090	100	27.787	1219180	1219180	93.47	1131	1131	20
GCF_000687855.1	REF81MG3091	100	28.498	893830	893830	68.02	1386	1386	127
GCF_000689175.1	REF81MG3112	100	35.112	1018435	1018435	88.7	1111	1111	55
GCF_000689375.1	REF81MG3115	100	36.142	1012588	1012588	84.78	978	978	108
GCF_000691385.1	REF81MG3119	100	27.092	846651	846651	71.54	1399	1399	104
GCF_000695835.1	REF81MG3125	100	30.829	793841	793841	70.46	1329	1329	109
GCF_000696365.1	REF81MG3128	100	32.476	1657692	1657692	87.66	1720	1720	82
GCF_000701485.1	REF81MG3145	100	29.038	813344	813344	67.33	1382	1382	112
GCF_000701785.1	REF81MG3154	100	24.969	840640	840640	70.12	1497	1497	97
GCF_000701805.1	REF81MG3155	100	28.191	767866	767866	70.33	1298	1298	103
GCF_000701825.1	REF81MG3156	100	22.386	902877	902877	66.02	1447	1447	135
GCF_000701845.1	REF81MG3157	100	29.094	910711	910711	73.6	1514	1514	93.5
GCF_000701865.1	REF81MG3158	100	24.263	811556	811556	70.28	1359	1359	115
GCF_000702705.1	REF81MG3183	100	31.779	852572	852572	74.9	1476	1476	86
GCF_000702725.1	REF81MG3184	100	28.114	778966	778966	72.11	1480	1480	88
GCF_000702745.1	REF81MG3185	100	26.999	661755	661755	71.48	1184	1184	100
GCF_000702765.1	REF81MG3186	100	30.858	1430451	1430451	93.25	1347	1347	27.5
GCF_000702785.1	REF81MG3187	100	27.617	902769	902769	73.11	1574	1574	92
GCF_000702805.1	REF81MG3188	100	26.275	739184	739184	71.84	1294	1294	94
GCF_000706625.1	REF81MG3200	100	37.429	1747106	1747106	74.57	1458	1458	124
GCF_000706645.1	REF81MG3201	100	35.054	1534143	1534143	80.37	1292	1292	108
GCF_000709795.1	REF81MG3207	100	37.458	1394706	1394706	82.89	1155	1155	115
GCF_000710735.1	REF81MG3212	100	32.105	1696970	1696970	91.44	1526	1526	48.5
GCF_000712165.1	REF81MG3238	100	31.854	835388	835388	76.5	1212	1212	92.5
GCF_000712175.1	REF81MG3239	100	26.878	765157	765157	71.87	1299	1299	106
GCF_000712185.1	REF81MG3240	100	28.932	779012	779012	71.34	1250	1250	106
GCF_000731795.1	REF81MG3330	100	35.746	1080611	1080611	88.37	957	957	69
GCF_000731915.1	REF81MG3331	100	28.086	1011202	1011202	70.69	1502	1502	130
GCF_000733865.1	REF81MG3349	100	27.61	850030	850030	68.93	1404	1404	112
GCF_000022525.1	REF81MG340	100	41.271	879977	879977	85.6	799	799	97
GCF_000742475.1	REF81MG3419	100	49.713	1115609	1115609	89.48	1057	1057	54
GCF_000022605.2	REF81MG343	100	27.142	636850	636850	95.76	582	582	17
GCF_000022725.1	REF81MG344	100	38.057	2341328	2341328	76.47	1959	1959	112
GCF_000746585.1	REF81MG3491	100	30.772	1851238	1851238	86.1	1780	1780	86
GCF_000008885.1	REF81MG35	100	22.479	697724	697724	89.68	640	640	53
GCF_000751075.1	REF81MG3504	100	32.357	1356124	1356124	83.92	1515	1515	96
GCF_000753815.1	REF81MG3516	100	28.96	1084158	1084158	64.45	1527	1527	140
GCF_000754265.1	REF81MG3519	100	38.996	759425	759425	88.69	684	684	64.5
GCF_000757905.1	REF81MG3542	100	37.585	2953863	2953863	84.41	2659	2659	86
GCF_000764555.1	REF81MG3598	100	32.416	2015987	2015987	92.89	1945	1945	30
GCF_000815025.1	REF81MG3740	100	34.593	656901	656901	86.82	566	566	73
GCF_000815065.1	REF81MG3741	100	28.958	778866	778866	68.75	1186	1186	112.5
GCF_000815225.1	REF81MG3743	100	31.997	1658482	1658482	91.38	1526	1526	49
GCF_000817295.2	REF81MG3753	100	31.794	576757	576757	78.78	502	502	100.5
GCF_000820525.1	REF81MG3767	100	26.563	1771859	1771859	58.47	3438	3438	147
GCF_000825765.1	REF81MG3779	100	30.205	1397109	1397109	75.83	1047	1047	206
GCF_000828125.2	REF81MG3796	100	32.261	1353512	1353512	84.95	1411	1411	107
GCF_000828515.1	REF81MG3798	100	30.217	745590	745590	83.17	620	620	88
GCF_000828815.1	REF81MG3804	100	25.07	708439	708439	86.96	623	623	72.5
GCF_000828855.1	REF81MG3806	100	24.343	693241	693241	67.83	1070	1070	121
GCF_000829235.1	REF81MG3812	100	33.413	2794318	2794318	56.64	1907	1907	318
GCF_000829315.1	REF81MG3813	100	36.25	1250060	1250060	82.53	1368	1368	79
GCF_000875755.1	REF81MG3844	100	25.736	895051	895051	64.06	1489	1489	130.5
GCF_000941075.1	REF81MG3875	100	29.04	1084449	1084449	68.28	1629	1629	118
GCF_000953195.1	REF81MG3894	100	31.29	1587120	1587120	92.47	1454	1454	26
GCF_000953435.1	REF81MG3897	100	25.256	357498	357498	93.54	318	318	23
GCF_000024505.1	REF81MG394	100	49.985	1206806	1206806	87.21	1017	1017	92
GCF_000964595.1	REF81MG3940	100	29.221	1092196	1092196	76.48	1045	1045	106
GCF_000964795.1	REF81MG3941	100	27.753	1268660	1268660	74.29	943	943	174
GCF_000964995.1	REF81MG3942	100	32.77	1438374	1438374	80.16	1738	1738	111
GCF_000967915.1	REF81MG3954	100	35.77	1877792	1877792	91.8	1704	1704	37
GCF_000968055.1	REF81MG3955	100	28.983	1554229	1554229	91.51	1444	1444	40
GCF_000969625.1	REF81MG3964	100	25.972	632834	632834	74.77	1039	1039	96
GCF_000969765.1	REF81MG3967	100	28.345	846495	846495	65.1	1425	1425	111
GCF_000006685.1	REF81MG4	100	40.337	1072950	1072950	91.09	887	887	53
GCF_000973505.1	REF81MG4000	100	29.078	749321	749321	80.79	597	597	141
GCF_000973545.1	REF81MG4001	100	27.356	773940	773940	75.49	608	608	164.5
GCF_001027545.1	REF81MG4082	100	39.342	1588979	1588979	92.35	1349	1349	34
GCF_001029265.1	REF81MG4090	100	29.794	1365714	1365714	68.91	2348	2348	109
GCF_001077715.1	REF81MG4153	100	38.172	1733840	1733840	63.9	1960	1960	132
GCF_001189415.1	REF81MG4179	100	25.161	345965	345965	92.94	304	304	53
GCF_001262715.1	REF81MG4216	100	24.2	1261374	1261374	69.25	2108	2108	97
GCF_001267155.1	REF81MG4225	100	24.916	1225519	1225519	69.85	2145	2145	103
GCF_001269425.1	REF81MG4231	100	31.635	632672	632672	85.99	543	543	66
GCF_001274875.1	REF81MG4244	100	24.971	1463926	1463926	54.72	2512	2512	139
GCF_001280225.1	REF81MG4266	100	25.582	628164	628164	89.55	581	581	62
GCF_001281045.1	REF81MG4272	100	25.009	1179577	1179577	68.67	2122	2122	103
GCF_001281405.1	REF81MG4276	100	38.417	1467695	1467695	82.44	1249	1249	108
GCF_000025845.1	REF81MG430	100	26.954	934379	934379	71.76	1622	1622	99
GCF_000026005.1	REF81MG437	100	27.479	1516355	1516355	63.25	961	961	289
GCF_000026205.1	REF81MG442	100	21.394	601943	601943	80.73	501	501	81
GCF_000026765.1	REF81MG446	100	28.49	846214	846214	70.92	1310	1310	110
GCF_000027325.1	REF81MG449	100	31.689	580076	580076	78.55	991	991	58
GCF_000043285.1	REF81MG450	100	27.383	705557	705557	85.1	601	601	102.5
GCF_000046705.1	REF81MG451	100	38.23	1931047	1931047	75.23	1631	1631	119.5
GCF_000055945.1	REF81MG453	100	33.284	1457619	1457619	86	1262	1262	83
GCF_000009845.1	REF81MG46	100	27.76	853092	853092	80.65	954	954	93
GCF_000063545.1	REF81MG461	100	30.531	2127051	2127051	75.79	2443	2443	103.5
GCF_000063605.1	REF81MG462	100	29.707	877438	877438	70.93	1530	1530	103
GCF_000069925.1	REF81MG468	100	27.425	879959	879959	75.37	827	827	82
GCF_000073005.1	REF81MG472	100	34.19	1482455	1482455	87.61	1410	1410	68.5
GCF_000085865.1	REF81MG473	100	27.118	665445	665445	74.02	1113	1113	96
GCF_000090965.1	REF81MG474	100	20.097	416380	416380	87.04	369	369	84.5
GCF_001547975.1	REF81MG4795	100	26.377	678592	678592	69.59	1113	1113	112.5
GCF_001553195.1	REF81MG4805	100	27.217	897443	897443	72.01	1473	1473	109
GCF_000009945.1	REF81MG49	100	39.375	1166239	1166239	90.99	981	981	45
GCF_900002265.1	REF81MG4989	100	51.912	2500326	2500326	80.84	2916	2916	83
GCF_000092585.1	REF81MG499	100	31.47	1012800	1012800	71.76	1640	1640	93
GCF_000093065.1	REF81MG509	100	28.483	574390	574390	82.17	480	480	92.5
GCF_000093165.1	REF81MG511	100	28.211	636994	636994	95.17	587	587	17
GCF_000143625.1	REF81MG515	100	42.358	2028330	2028330	84.71	2164	2164	81
GCF_000010085.1	REF81MG53	100	54.699	4171146	4171146	79.1	5542	5542	73
GCF_000010645.1	REF81MG68	100	32.658	1114206	1114206	75.75	933	933	109
GCF_000007025.1	REF81MG7	100	32.439	1268755	1268755	81.01	1430	1430	114
GCF_000168295.1	REF81MG735	100	37.867	1581239	1581239	90.3	1446	1446	55.5
GCF_000011225.1	REF81MG77	100	25.718	1358633	1358633	66.86	2361	2361	127
GCF_000178375.1	REF81MG812	100	26.686	973030	973030	69.02	1667	1667	112
GCF_000011565.1	REF81MG82	100	34.717	2414465	2414465	81.51	1903	1903	122
GCF_000179035.2	REF81MG821	100	31.076	742431	742431	58.21	1389	1389	137
GCF_000183385.1	REF81MG841	100	29.315	1003404	1003404	70.4	1677	1677	107
GCF_000011745.1	REF81MG85	100	29.565	791654	791654	77.56	620	620	155
GCF_000185985.2	REF81MG869	100	27.508	722585	722585	82.84	596	596	119
GCF_000186985.1	REF81MG878	100	38.813	1155937	1155937	63.31	2460	2460	106
GCF_000012145.1	REF81MG89	100	32.45	1485148	1485148	85.29	1513	1513	107
GCF_000012225.1	REF81MG90	100	26.886	706569	706569	74.13	660	660	116
GCF_000195875.1	REF81MG938	100	26.637	963879	963879	65.42	1505	1505	136
GCF_000012385.1	REF81MG95	100	31.646	1522076	1522076	86.51	1512	1512	84
GCF_000196435.1	REF81MG952	100	38.856	2619061	2619061	75.98	2285	2285	102
GCF_000209735.1	REF81MG995	100	26.817	1004014	1004014	64.48	1742	1742	122
		MIN	26.817	345965		54.72
		MAX	54.699	4171146		95.76
		Median	29.707	1011202		76.94

## Sheet: Table_S9
Back to index
Supplementary Table 9. Basic statistics for the manually curated free-living bacteria database used in this study.
FILENAME	Group	Phyla	Class	Lifestyle	Genome_completeness	GC	Number of contigs	Estimates_Genome_size	Coding density	TOTAL_CDS	Total_CDS_estimation	MEDIAN_INTERGENIC_SPACER
G-pectinivorans	Bacteria	Acidobacteriota	Acidobacteriae	free-living	100	61.279	3	5275857	86.9	4280	4280	75
G-rosea	Bacteria	Acidobacteriota	Acidobacteriae	free-living	100	62.912	24	5293785	89.93	4294	4294	87
nan-abu-IIB91	Bacteria	Actinobacteriota;c__Actinobacteria;o__Nanopelagicales;f__Nanopelagicaceae;g__Planktophila;s__	Actinobacteria	free-living	100	40.218	1	1161863	90.21	1171	1171	14
acIB-AAA278-I18	Bacteria	Actinobacteriota;c__Actinobacteria;o__Nanopelagicales;f__Nanopelagicaceae;g__Planktophila;s__	Actinobacteria	free-living	100	41.35	56	1.45892e+06	91.44	988	988	12
nan-limnes-21-122	Bacteria	Actinobacteriota;c__Actinobacteria;o__Nanopelagicales;f__Nanopelagicaceae;g__Planktophila;s__	Actinobacteria	free-living	100	41.45	1	1238108	89.57	1235	1235	10
acIB-AAA028-A23	Bacteria	Actinobacteriota;c__Actinobacteria;o__Nanopelagicales;f__Nanopelagicaceae;g__Planktophila;s__	Actinobacteria	free-living	100	41.54	68	1.16655e+06	90.96	882	882	12
acIB-AAA027-L06	Bacteria	Actinobacteriota;c__Actinobacteria;o__Nanopelagicales;f__Nanopelagicaceae;g__Planktophila;s__	Actinobacteria	free-living	100	41.689	75	1.21847e+06	87.1	1181	1181	13
acIB-AAA027-J17	Bacteria	Actinobacteriota;c__Actinobacteria;o__Nanopelagicales;f__Nanopelagicaceae;g__Planktophila;s__	Actinobacteria	free-living	100	42.198	83	1.30091e+06	91.99	1101	1101	14
nan-hibe-21-160	Bacteria	Actinobacteriota;c__Actinobacteria;o__Nanopelagicales;f__Nanopelagicaceae;g__Planktophila;s__	Actinobacteria	free-living	100	42.372	1	1223088	91.57	1234	1234	13
p-limne-114	Bacteria	Actinobacteriota;c__Actinobacteria;o__Nanopelagicales;f__Nanopelagicaceae;g__Planktophila;s__	Actinobacteria	free-living	100	45.02	1	1328793	91.83	1344	1344	10
LimC-T6-20	Bacteria	Actinobacteriota;c__Actinobacteria;o__Nanopelagicales;f__Nanopelagicaceae;g__Planktophila;s__	Actinobacteria	free-living	100	45.363	82	1.04139e+06	90.63	799	799	11
acI-A7-IMCC19121	Bacteria	Actinobacteriota;c__Actinobacteria;o__Nanopelagicales;f__Nanopelagicaceae;g__Planktophila;s__	Actinobacteria	free-living	100	45.448	1	1506415	91.41	1489	1489	10
acIA-AAA044-N04	Bacteria	Actinobacteriota;c__Actinobacteria;o__Nanopelagicales;f__Nanopelagicaceae;g__Planktophila;s__	Actinobacteria	free-living	100	45.574	25	1.79262e+06	90.85	1290	1290	10
p-vern-IIA-15	Bacteria	Actinobacteriota;c__Actinobacteria;o__Nanopelagicales;f__Nanopelagicaceae;g__Planktophila;s__	Actinobacteria	free-living	100	45.746	1	1364004	89.29	1369	1369	10
acI-A4-IMCC26103	Bacteria	Actinobacteriota;c__Actinobacteria;o__Nanopelagicales;f__Nanopelagicaceae;g__Planktophila;s__	Actinobacteria	free-living	100	46.961	1	1456516	88.96	1435	1435	13
p-lacus-21-148	Bacteria	Actinobacteriota;c__Actinobacteria;o__Nanopelagicales;f__Nanopelagicaceae;g__Planktophila;s__	Actinobacteria	free-living	100	47.54	1	1460061	90.42	1448	1448	14
acIA-AAA278-O22	Bacteria	Actinobacteriota;c__Actinobacteria;o__Nanopelagicales;f__Nanopelagicaceae;g__Planktophila;s__	Actinobacteria	free-living	100	47.608	43	1.28951e+06	88.94	1150	1150	11
p-lacus-IIB-60	Bacteria	Actinobacteriota;c__Actinobacteria;o__Nanopelagicales;f__Nanopelagicaceae;g__Planktophila;s__	Actinobacteria	free-living	100	47.757	1	1410107	89.02	1400	1400	15
p-lacus-IIB-106	Bacteria	Actinobacteriota;c__Actinobacteria;o__Nanopelagicales;f__Nanopelagicaceae;g__Planktophila;s__	Actinobacteria	free-living	100	47.775	1	1384812	89.36	1378	1378	14.5
p-dulcis-21-155	Bacteria	Actinobacteriota;c__Actinobacteria;o__Nanopelagicales;f__Nanopelagicaceae;g__Planktophila;s__	Actinobacteria	free-living	100	47.92	1	1361776	89.77	1368	1368	11
p-dulcis-IA-53	Bacteria	Actinobacteriota;c__Actinobacteria;o__Nanopelagicales;f__Nanopelagicaceae;g__Planktophila;s__	Actinobacteria	free-living	100	47.963	1	1365934	88.11	1368	1368	11
p-dulcis-IIA-65	Bacteria	Actinobacteriota;c__Actinobacteria;o__Nanopelagicales;f__Nanopelagicaceae;g__Planktophila;s__	Actinobacteria	free-living	100	47.984	1	1348019	89.66	1358	1358	11
p-vers-105	Bacteria	Actinobacteriota;c__Actinobacteria;o__Nanopelagicales;f__Nanopelagicaceae;g__Planktophila;s__	Actinobacteria	free-living	100	48.181	1	1326591	90.6	1338	1338	14
p-vers-IIB-76	Bacteria	Actinobacteriota;c__Actinobacteria;o__Nanopelagicales;f__Nanopelagicaceae;g__Planktophila;s__	Actinobacteria	free-living	100	48.22	1	1325420	90.14	1328	1328	14
p-vers-IA-79	Bacteria	Actinobacteriota;c__Actinobacteria;o__Nanopelagicales;f__Nanopelagicaceae;g__Planktophila;s__	Actinobacteria	free-living	100	48.256	1	1331009	91.93	1339	1339	14
p-vers-IIB-142	Bacteria	Actinobacteriota;c__Actinobacteria;o__Nanopelagicales;f__Nanopelagicaceae;g__Planktophila;s__	Actinobacteria	free-living	100	48.315	1	1266983	85.39	1269	1269	13
p-sulfonica-IA-56	Bacteria	Actinobacteriota;c__Actinobacteria;o__Nanopelagicales;f__Nanopelagicaceae;g__Planktophila;s__	Actinobacteria	free-living	100	48.564	1	1344614	85.42	1345	1345	12
acI-A1-IMCC25003	Bacteria	Actinobacteriota;c__Actinobacteria;o__Nanopelagicales;f__Nanopelagicaceae;g__Planktophila;s__	Actinobacteria	free-living	100	49.052	1	1353947	85.38	1359	1359	12
acI-C1-IMCC26077	Bacteria	Actinobacteriota;c__Actinobacteria;o__Nanopelagicales;f__Nanopelagicaceae;g__Planktophila;s__	Actinobacteria	free-living	100	51.311	1	1551612	87.47	1519	1519	15
rh-lacicola	Bacteria	Actinobacteriota	Actinobacteria	free-living	100	51.527	1	1430433	90.25	1365	1365	24
aqu-IMCC13023	Bacteria	Actinobacteriota	Actinobacteria	free-living	100	51.658	5	1359661	91.66	1339	1339	15
aqu-UB-Mad	Bacteria	Actinobacteriota	Actinobacteria	free-living	100	51.857	1	1663904	93.08	1632	1632	17
rh-plankt	Bacteria	Actinobacteriota	Actinobacteria	free-living	100	52.038	1	1424506	90.96	1341	1341	22
luna2-MWH-Mo1	Bacteria	Actinobacteriota	Actinobacteria	free-living	100	54.571	19	1740126	90.65	1719	1719	25
actino-LLX17	Bacteria	Actinobacteriota	Actinobacteria	free-living	100	70.484	1	3000939	89.83	2967	2967	33
Fub-LSUCC0530	Bacteria	Proteobacteria	Alphaproteobacteria	free-living	100	29.024	1	1160202	89.1	1231	1231	5
LD12-M09	Bacteria	Proteobacteria	Alphaproteobacteria	free-living	100	29.106	97	1.08809e+06	88.59	692	692	5
LD12-L09	Bacteria	Proteobacteria	Alphaproteobacteria	free-living	100	29.38	76	1.30328e+06	88.71	828	828	5
LD12-L15	Bacteria	Proteobacteria	Alphaproteobacteria	free-living	100	29.387	56	1.19215e+06	88.54	767	767	4
LD12-C07	Bacteria	Proteobacteria	Alphaproteobacteria	free-living	100	29.532	32	1.17461e+06	88.61	931	931	5
LD12-P20	Bacteria	Proteobacteria	Alphaproteobacteria	free-living	100	29.561	65	888645	88.52	756	756	5
LD12-C06	Bacteria	Proteobacteria	Alphaproteobacteria	free-living	100	29.611	90	1.02461e+06	89.05	838	838	5
LD12-D10	Bacteria	Proteobacteria	Alphaproteobacteria	free-living	100	29.611	58	1.28194e+06	90.83	1005	1005	6
LD12-J10	Bacteria	Proteobacteria	Alphaproteobacteria	free-living	100	29.76	82	1.22251e+06	88.38	860	860	6
LD12-B11	Bacteria	Proteobacteria	Alphaproteobacteria	free-living	100	29.845	47	1.41211e+06	86.12	756	756	7
LD12-N17	Bacteria	Proteobacteria	Alphaproteobacteria	free-living	100	30.099	45	1.256e+06	93.76	346	346	6
sphing-MMS-80m-1	Bacteria	Proteobacteria	Alphaproteobacteria	free-living	100	55.049	18	2510115	93.97	2379	2379	36
Asti-CB48	Bacteria	Proteobacteria	Alphaproteobacteria	free-living	100	59.581	2	3904170	91.67	3498	3498	78
Caul-OTS	Bacteria	Proteobacteria	Alphaproteobacteria	free-living	100	61.501	1	3732719	91.31	3866	3866	45
Novingo-Chol	Bacteria	Proteobacteria	Alphaproteobacteria	free-living	100	61.935	10	3711414	85.12	3542	3542	61
Sphbium-EP	Bacteria	Proteobacteria	Alphaproteobacteria	free-living	100	62.165	2	3800386	84.8	3621	3621	61
Niviril	Bacteria	Proteobacteria	Alphaproteobacteria	free-living	100	62.167	31	4972769	83.65	4388	4388	73
Parvi	Bacteria	Proteobacteria	Alphaproteobacteria	free-living	100	62.328	1	3914745	89.44	3695	3695	61
Sphbium-MI	Bacteria	Proteobacteria	Alphaproteobacteria	free-living	100	62.332	2	3918404	89.63	3810	3810	53
Sphbium-GW	Bacteria	Proteobacteria	Alphaproteobacteria	free-living	100	63.111	6	5078579	90.81	4830	4830	57
Magspir-R3S1	Bacteria	Proteobacteria	Alphaproteobacteria	free-living	100	63.199	1	4155740	89.87	3899	3899	40
Sphbium-RA	Bacteria	Proteobacteria	Alphaproteobacteria	free-living	100	63.283	1	3232017	89.51	3064	3064	60
Magspir-MSR	Bacteria	Proteobacteria	Alphaproteobacteria	free-living	100	63.285	1	4365796	88.75	4106	4106	37
Sphbium-TK	Bacteria	Proteobacteria	Alphaproteobacteria	free-living	100	63.286	2	5238977	88.5	5025	5025	59
Sphbium-Z	Bacteria	Proteobacteria	Alphaproteobacteria	free-living	100	63.321	7	4938010	90.93	4726	4726	59
Nivcya-TH16	Bacteria	Proteobacteria	Alphaproteobacteria	free-living	100	63.467	2	4652387	87.54	4192	4192	63
Sphmona-KC8	Bacteria	Proteobacteria	Alphaproteobacteria	free-living	100	63.694	1	4123013	90.77	3924	3924	51
Sphpyxi-C1	Bacteria	Proteobacteria	Alphaproteobacteria	free-living	100	63.735	2	4583092	88.71	4272	4272	49
Sphpyxi-11	Bacteria	Proteobacteria	Alphaproteobacteria	free-living	100	64.046	1	4420776	87.88	4296	4296	43
Rhodop-JSC	Bacteria	Proteobacteria	Alphaproteobacteria	free-living	100	64.228	42	4065277	88.38	3684	3684	108
Gemmo-HYN	Bacteria	Proteobacteria	Alphaproteobacteria	free-living	100	64.262	1	3694576	89.8	3586	3586	62
Rhodop-BisA	Bacteria	Proteobacteria	Alphaproteobacteria	free-living	100	64.443	1	5505494	88.53	4932	4932	106
Sphiter	Bacteria	Proteobacteria	Alphaproteobacteria	free-living	100	64.573	1	3979087	90.3	3784	3784	52
Metsinu-LW3	Bacteria	Proteobacteria	Alphaproteobacteria	free-living	100	64.665	5	5090474	88.84	4611	4611	78.5
Rhodop-BisB5	Bacteria	Proteobacteria	Alphaproteobacteria	free-living	100	64.808	1	4892717	89.66	4414	4414	110
Rhodop-TIE	Bacteria	Proteobacteria	Alphaproteobacteria	free-living	100	64.86	1	5744041	90.26	5295	5295	97
Metsinu-LW4	Bacteria	Proteobacteria	Alphaproteobacteria	free-living	100	64.93	14	4822641	89.68	4363	4363	75
Rhodop-BisB	Bacteria	Proteobacteria	Alphaproteobacteria	free-living	100	64.957	1	5513844	90.8	4965	4965	109
Novingo-TH	Bacteria	Proteobacteria	Alphaproteobacteria	free-living	100	64.985	3	2982565	92.27	2903	2903	33
Rhodop-CGA	Bacteria	Proteobacteria	Alphaproteobacteria	free-living	100	65.038	1	5459213	86.57	4946	4946	101
Magspir-AMB	Bacteria	Proteobacteria	Alphaproteobacteria	free-living	100	65.094	1	4967148	89.84	4617	4617	50
Novoaro	Bacteria	Proteobacteria	Alphaproteobacteria	free-living	100	65.153	1	3561584	90.39	3377	3377	46
Rhodop-YSC3	Bacteria	Proteobacteria	Alphaproteobacteria	free-living	100	65.163	1	5371816	85.34	4893	4893	102
Rhodop-PS3	Bacteria	Proteobacteria	Alphaproteobacteria	free-living	100	65.26	1	5269926	84.65	4795	4795	104
Novingo-FUKU	Bacteria	Proteobacteria	Alphaproteobacteria	free-living	100	65.279	7	3968408	84.1	3591	3591	40
Rhodop-DX	Bacteria	Proteobacteria	Alphaproteobacteria	free-living	100	65.441	1	5404117	82.27	4959	4959	101
Magspir-ME	Bacteria	Proteobacteria	Alphaproteobacteria	free-living	100	65.625	1	4551873	78.36	4155	4155	56
Magspir-XM1	Bacteria	Proteobacteria	Alphaproteobacteria	free-living	100	65.639	1	4825187	79.19	4400	4400	49
Parazhe-J6	Bacteria	Proteobacteria	Alphaproteobacteria	free-living	100	65.767	1	3985112	82.72	3815	3815	44
Caulhen-CB4	Bacteria	Proteobacteria	Alphaproteobacteria	free-living	100	65.799	1	3864204	79.76	3604	3604	69
Sphsini	Bacteria	Proteobacteria	Alphaproteobacteria	free-living	100	65.858	3	3026036	84.51	2940	2940	57
Rhodop-Ha	Bacteria	Proteobacteria	Alphaproteobacteria	free-living	100	66.038	1	5331656	87.03	4733	4733	105
Sphinkor	Bacteria	Proteobacteria	Alphaproteobacteria	free-living	100	66.109	1	4508286	86.07	4329	4329	38
Sphmona-LM7	Bacteria	Proteobacteria	Alphaproteobacteria	free-living	100	66.203	1	4155514	86.29	3824	3824	50
alph-L41A	Bacteria	Proteobacteria	Alphaproteobacteria	free-living	100	66.402	67	3110697	82.81	3020	3020	52
Rhodocap	Bacteria	Proteobacteria	Alphaproteobacteria	free-living	100	66.562	1	3738958	81.6	3473	3473	56
Rhodosp28-5	Bacteria	Proteobacteria	Alphaproteobacteria	free-living	100	66.61	1	3548948	80.2	3429	3429	54
Sphinhen-WHSC	Bacteria	Proteobacteria	Alphaproteobacteria	free-living	100	66.698	1	5191536	80.08	4762	4762	49
Caulvib-CB13	Bacteria	Proteobacteria	Alphaproteobacteria	free-living	100	67.126	1	4143958	83.01	3834	3834	78
Caulvib-CB1	Bacteria	Proteobacteria	Alphaproteobacteria	free-living	100	67.163	1	4137285	83.05	3804	3804	77
Sphmona-MM1	Bacteria	Proteobacteria	Alphaproteobacteria	free-living	100	67.168	1	4054833	80.72	3800	3800	55
Caulcres-NA	Bacteria	Proteobacteria	Alphaproteobacteria	free-living	100	67.172	1	4042929	80.78	3711	3711	78
Caulcres-CB15	Bacteria	Proteobacteria	Alphaproteobacteria	free-living	100	67.214	1	4016947	81.82	3691	3691	78
Caulvib-CB2	Bacteria	Proteobacteria	Alphaproteobacteria	free-living	100	67.222	1	4123726	81.9	3821	3821	76
Caul-FWC2	Bacteria	Proteobacteria	Alphaproteobacteria	free-living	100	67.383	2	5511152	87.48	5094	5094	66
Caul-K31	Bacteria	Proteobacteria	Alphaproteobacteria	free-living	100	67.463	1	5477872	87.22	5092	5092	88
Brevnae-B1	Bacteria	Proteobacteria	Alphaproteobacteria	free-living	100	67.524	1	2971535	86.87	2793	2793	69
Sphinwit-DC	Bacteria	Proteobacteria	Alphaproteobacteria	free-living	100	67.64	1	5921052	89.45	5548	5548	52
Caul-X	Bacteria	Proteobacteria	Alphaproteobacteria	free-living	100	67.664	9	4811207	89.35	4463	4463	66
Sphmona-IBV	Bacteria	Proteobacteria	Alphaproteobacteria	free-living	100	67.808	9	4293819	90.21	4002	4002	53
Blastvir-1	Bacteria	Proteobacteria	Alphaproteobacteria	free-living	100	67.932	1	3723225	89.93	3257	3257	112
Blastvir-ATCC	Bacteria	Proteobacteria	Alphaproteobacteria	free-living	100	67.933	1	3724841	89.71	3260	3260	112
Blastvir-DSM	Bacteria	Proteobacteria	Alphaproteobacteria	free-living	100	67.933	1	3726627	95.4	3261	3261	112
Metpila-M107	Bacteria	Proteobacteria	Alphaproteobacteria	free-living	100	67.975	1	4453493	95.1	4163	4163	86
Tistr	Bacteria	Proteobacteria	Alphaproteobacteria	free-living	100	68.145	1	3919492	87.11	3590	3590	66
Sphinwit-RW	Bacteria	Proteobacteria	Alphaproteobacteria	free-living	100	68.398	1	5382261	94.78	4923	4923	51
Sphinasta	Bacteria	Proteobacteria	Alphaproteobacteria	free-living	100	68.402	3	2533034	95	2502	2502	37
Brevsub-ATCC	Bacteria	Proteobacteria	Alphaproteobacteria	free-living	100	68.423	1	3445263	95.2	3319	3319	55.5
Rhodosp-ATCC	Bacteria	Proteobacteria	Alphaproteobacteria	free-living	100	68.478	1	3217726	95.13	3209	3209	52
Paracon	Bacteria	Proteobacteria	Alphaproteobacteria	free-living	100	68.678	1	2939512	95.5	2769	2769	52
Rhodosp-ATCC2	Bacteria	Proteobacteria	Alphaproteobacteria	free-living	100	68.963	2	4366774	94.83	4094	4094	59
Rhodosp-8	Bacteria	Proteobacteria	Alphaproteobacteria	free-living	100	69.007	2	4130918	94.87	3896	3896	64
Rhodosp-241	Bacteria	Proteobacteria	Alphaproteobacteria	free-living	100	69.009	2	4131542	95.51	3894	3894	64
Rhodosp-13	Bacteria	Proteobacteria	Alphaproteobacteria	free-living	100	69.009	2	4131491	95.34	3896	3896	64
Rhodosp-20	Bacteria	Proteobacteria	Alphaproteobacteria	free-living	100	69.009	2	4131438	94.86	3901	3901	64
Rhodosp-KD	Bacteria	Proteobacteria	Alphaproteobacteria	free-living	100	69.039	2	4450439	95.25	4172	4172	61
Rhodosp-WS	Bacteria	Proteobacteria	Alphaproteobacteria	free-living	100	69.121	2	4107586	95.28	3889	3889	61
Caulmir-FWC	Bacteria	Proteobacteria	Alphaproteobacteria	free-living	100	69.317	1	4577265	95.16	4298	4298	63
Metpila-73B	Bacteria	Proteobacteria	Alphaproteobacteria	free-living	100	69.354	2	4382767	94.97	4104	4104	77
Metaq-MA22A	Bacteria	Proteobacteria	Alphaproteobacteria	free-living	100	71.107	1	5348274	95.17	4869	4869	99
Sedimini-C3	Bacteria	Bacteroidota	Bacteroidia	free-living	100	39.244	27	3214687	94.98	2943	2943	34
S-salmoneum	Bacteria	Bacteroidota	Bacteroidia	free-living	100	39.276	110	3189154	95.57	2912	2912	34
F-lacunae	Bacteria	Bacteroidota	Bacteroidia	free-living	100	44.034	42	7763674	95.52	6171	6171	63
S-ginsengisoli	Bacteria	Bacteroidota	Bacteroidia	free-living	100	46.245	22	4089980	95.53	3567	3567	61
Aur-CCBQB1	Bacteria	Bacteroidota	Bacteroidia	free-living	100	35.68	151	7354970	95.54	5753	5753	131
S-grandis2844	Bacteria	Bacteroidota	Bacteroidia	free-living	100	46.056	76	4488150	95.55	3516	3516	114
S-grandisLewin	Bacteria	Bacteroidota	Bacteroidia	free-living	100	46.36	1	4345237	95.55	3431	3431	120.5
H-hydrossis	Bacteria	Bacteroidota	Bacteroidia	free-living	100	47.133	1	8371686	95.55	6595	6595	99
In-alkaliphilus	Bacteria	Bacteroidota	Bacteroidia	free-living	100	39.677	56	5036047	95.54	4331	4331	72
Cec-lonarensis	Bacteria	Bacteroidota	Bacteroidia	free-living	100	40.96	358	4842844	95.53	4215	4215	60
Nit-halal	Bacteria	Bacteroidota	Bacteroidia	free-living	100	48.581	140	3633701	95.36	4133	4133	43
E-oligotrophica	Bacteria	Bacteroidota	Bacteroidia	free-living	100	35.698	1	4798158	95.6	3972	3972	89
R-slithyformis	Bacteria	Bacteroidota	Bacteroidia	free-living	100	46.59	1	6568739	95.58	5660	5660	85
Spir-linguale	Bacteria	Bacteroidota	Bacteroidia	free-living	100	50.193	1	8078757	95.58	6683	6683	95
F-taffensis	Bacteria	Bacteroidota	Bacteroidia	free-living	100	36.495	1	4633577	95.51	4093	4093	65
F-columnare	Bacteria	Bacteroidota	Bacteroidia	free-living	100	31.465	1	3162432	95.62	2724	2724	78
F-seoulense	Bacteria	Bacteroidota	Bacteroidia	free-living	100	33.25	56	3792640	95.6	3174	3174	79
P-burtonensis	Bacteria	Bacteroidota	Bacteroidia	free-living	100	33.411	72	3971156	95.61	3577	3577	76
F-aquidurense	Bacteria	Bacteroidota	Bacteroidia	free-living	100	33.963	29	5440428	95.59	4564	4564	97
Fm-sacchar	Bacteria	Bacteroidota	Bacteroidia	free-living	100	33.98	14	5209309	95.45	4397	4397	92.5
Flavo-PK15	Bacteria	Bacteroidota	Bacteroidia	free-living	100	34.377	1	3851214	95.13	3188	3188	84
Flav-WG21	Bacteria	Bacteroidota	Bacteroidia	free-living	100	35.61	84	5198514	95.16	4282	4282	95
F-fluvii	Bacteria	Bacteroidota	Bacteroidia	free-living	100	36.983	27	4129111	91.56	3483	3483	78
F-rivuli	Bacteria	Bacteroidota	Bacteroidia	free-living	100	39.617	26	4487368	90.4	3965	3965	81
F-subsax	Bacteria	Bacteroidota	Bacteroidia	free-living	100	41.615	29	4629967	92.14	4053	4053	74
Chr-taiwanense	Bacteria	Bacteroidota	Bacteroidia	free-living	100	34.345	30	4122063	93.64	3740	3740	73
Chr-IHB-B10212	Bacteria	Bacteroidota	Bacteroidia	free-living	100	36.615	119	4484672	94.29	4069	4069	77
F-bacterium3519	Bacteria	Bacteroidota	Bacteroidia	free-living	100	42.693	1	2768102	87.45	2511	2511	66
P-steynii	Bacteria	Bacteroidota	Bacteroidia	free-living	100	41.312	1	6581659	93.8	5475	5475	55
Mu-paludis	Bacteria	Bacteroidota	Bacteroidia	free-living	100	42.855	1	8408322	93.34	7237	7237	81
P-hartonius	Bacteria	Bacteroidota	Bacteroidia	free-living	100	43.033	42	5188723	92.88	4628	4628	64
C-sequanensis	Bacteria	Verrucomicrobiota	Chlamydiia	free-living	100	38.239	23	2969604	92.7	2425	2425	64
Gemi-NIES3708	Bacteria	Cyanobacteriota	Cyanobacteriia	free-living	100	32.283	1	3883409	92.68	3463	3463	118
Gemi-NIES3709	Bacteria	Cyanobacteriota	Cyanobacteriia	free-living	100	33.345	1	4150181	93.56	3590	3590	130
Gher-PCC6308	Bacteria	Cyanobacteriota	Cyanobacteriia	free-living	100	34.276	1	4263418	93.24	4110	4110	122
Capo-PCC10605	Bacteria	Cyanobacteriota	Cyanobacteriia	free-living	100	34.958	1	4114099	93.49	3480	3480	157
Skiss-NIES73	Bacteria	Cyanobacteriota	Cyanobacteriia	free-living	100	36.972	1	5354839	93.8	4833	4833	153
Dcom-NIES806	Bacteria	Cyanobacteriota	Cyanobacteriia	free-living	100	37.458	1	5165988	92.85	4723	4723	137
Anabae-90	Bacteria	Cyanobacteriota	Cyanobacteriia	free-living	100	38.122	2	5149229	93.65	4702	4702	125
Anabae-WA102	Bacteria	Cyanobacteriota	Cyanobacteriia	free-living	100	38.393	1	5705437	93.6	5175	5175	145
Prub-N-CYA407	Bacteria	Cyanobacteriota	Cyanobacteriia	free-living	100	38.689	3	5505111	93.3	4834	4834	109
Prub-A7	Bacteria	Cyanobacteriota	Cyanobacteriia	free-living	100	39.473	70	5416307	93.58	4848	4848	106
Rcur-NIES932	Bacteria	Cyanobacteriota	Cyanobacteriia	free-living	100	39.502	1	3431981	85.71	3094	3094	79
Pag-N-CYA1268	Bacteria	Cyanobacteriota	Cyanobacteriia	free-living	100	39.613	1	4785602	93.35	4336	4336	110
Acirc-NIES21	Bacteria	Cyanobacteriota	Cyanobacteriia	free-living	100	40.331	1	6565356	93.24	5540	5540	132
Mae-PCC7806SL	Bacteria	Cyanobacteriota	Cyanobacteriia	free-living	100	42.087	1	5139339	93.48	4858	4858	129
Mae-NIES843	Bacteria	Cyanobacteriota	Cyanobacteriia	free-living	100	42.331	1	5842795	93.16	5595	5595	131.5
Mpa-FACHB1757	Bacteria	Cyanobacteriota	Cyanobacteriia	free-living	100	42.355	1	5686839	92.19	5678	5678	128
Mae-NIES2481	Bacteria	Cyanobacteriota	Cyanobacteriia	free-living	100	42.911	1	4293006	90.09	3998	3998	120
Mae-NIES2549	Bacteria	Cyanobacteriota	Cyanobacteriia	free-living	100	42.915	1	4294213	93.31	3976	3976	121
Aplat-C1	Bacteria	Cyanobacteriota	Cyanobacteriia	free-living	100	43.545	1	6089210	87.53	5518	5518	99
Aplat-NIES39	Bacteria	Cyanobacteriota	Cyanobacteriia	free-living	100	43.65	1	6788435	93.45	6302	6302	95
Aplat-YZ	Bacteria	Cyanobacteriota	Cyanobacteriia	free-living	100	44.187	1	6520772	90.03	6246	6246	94
Arth-PCC8005	Bacteria	Cyanobacteriota	Cyanobacteriia	free-living	100	44.728	1	6228153	94.8	5698	5698	97
Syn-PCC6803	Bacteria	Cyanobacteriota	Cyanobacteriia	free-living	100	47.72	1	3573470	90.23	3302	3302	102
Syn-PCC6714	Bacteria	Cyanobacteriota	Cyanobacteriia	free-living	100	47.808	1	3485441	94.07	3219	3219	99
Syn-PCC6312	Bacteria	Cyanobacteriota	Cyanobacteriia	free-living	100	48.517	1	3697276	91.56	3669	3669	77
Selo-PCC7942	Bacteria	Cyanobacteriota	Cyanobacteriia	free-living	100	55.47	1	2695903	91.56	2665	2665	69
Selo-PCC6301	Bacteria	Cyanobacteriota	Cyanobacteriia	free-living	100	55.484	1	2696255	91.56	2685	2685	69
C-PCC7001	Bacteria	Cyanobacteriota	Cyanobacteriia	free-living	100	68.616	1	3021545	89.68	3046	3046	50
Cya-NIES981	Bacteria	Cyanobacteriota	Cyanobacteriia	free-living	100	68.705	1	2832412	93.79	2814	2814	46
C-gracile-PCC6307	Bacteria	Cyanobacteriota	Cyanobacteriia	free-living	100	68.707	1	3342364	90.6	3354	3354	42
Mpla-MMS-RI-1	Bacteria	Proteobacteria	Gammaproteobacteria	free-living	100	36.653	1	1283799	94.28	1314	1314	13
Mpla-MMS-RI-41	Bacteria	Proteobacteria	Gammaproteobacteria	free-living	100	36.699	1	1301035	93.55	1332	1332	15
L-sainthelensi	Bacteria	Proteobacteria	Gammaproteobacteria	free-living	100	36.95	62	4108235	92.94	3511	3511	111.5
Mpla-MMS-2-53	Bacteria	Proteobacteria	Gammaproteobacteria	free-living	100	36.965	1	1356411	89.27	1406	1406	15
Mpla-MMS-VI-155	Bacteria	Proteobacteria	Gammaproteobacteria	free-living	100	37.044	1	1302740	91.67	1341	1341	15
Mpla-MMS-VB-103	Bacteria	Proteobacteria	Gammaproteobacteria	free-living	100	37.049	1	1304290	88.12	1340	1340	14
Mpla-MMS-VB-116	Bacteria	Proteobacteria	Gammaproteobacteria	free-living	100	37.078	1	1311334	93.87	1342	1342	15
Mpla-MMS-RIV-60	Bacteria	Proteobacteria	Gammaproteobacteria	free-living	100	37.088	1	1286449	94.67	1316	1316	13.5
Mpla-MMS-VI-180	Bacteria	Proteobacteria	Gammaproteobacteria	free-living	100	37.094	1	1312289	94.5	1348	1348	15
Mpla-MMS-VI-257	Bacteria	Proteobacteria	Gammaproteobacteria	free-living	100	37.094	1	1312210	88.08	1349	1349	15
Mpla-MMS-RIV-52	Bacteria	Proteobacteria	Gammaproteobacteria	free-living	100	37.096	1	1275319	93.58	1302	1302	13.5
Mpla-MMS-VA-83	Bacteria	Proteobacteria	Gammaproteobacteria	free-living	100	37.112	1	1275265	88.68	1302	1302	13
Mpla-MMS-VB-14	Bacteria	Proteobacteria	Gammaproteobacteria	free-living	100	37.112	1	1305510	89.43	1342	1342	15
Mpla-MMS-VB-8	Bacteria	Proteobacteria	Gammaproteobacteria	free-living	100	37.132	1	1299320	86.85	1331	1331	14
Mpla-MMS-VI-38	Bacteria	Proteobacteria	Gammaproteobacteria	free-living	100	37.147	1	1272650	94.35	1314	1314	13
Mpla-MMS-VB-110	Bacteria	Proteobacteria	Gammaproteobacteria	free-living	100	37.157	1	1313706	92.83	1349	1349	13
Mpla-MMS-VI-228	Bacteria	Proteobacteria	Gammaproteobacteria	free-living	100	37.158	1	1300923	94.91	1328	1328	14
Mpla-MMS-VB-60	Bacteria	Proteobacteria	Gammaproteobacteria	free-living	100	37.162	1	1271631	91.43	1317	1317	14
Mpla-MMS-VI-255	Bacteria	Proteobacteria	Gammaproteobacteria	free-living	100	37.165	1	1303509	94.38	1327	1327	14
Mpla-MMS-RIV-17	Bacteria	Proteobacteria	Gammaproteobacteria	free-living	100	37.178	1	1258664	94.42	1301	1301	13
Mpla-MMS-RII-56	Bacteria	Proteobacteria	Gammaproteobacteria	free-living	100	37.18	1	1280721	91.92	1325	1325	14
Mpla-MMS-RVI-12	Bacteria	Proteobacteria	Gammaproteobacteria	free-living	100	37.207	1	1275146	91.16	1305	1305	14
Mpla-MMS-RVI-34	Bacteria	Proteobacteria	Gammaproteobacteria	free-living	100	37.213	1	1269513	94.35	1300	1300	13.5
Mpla-MMS-RIV-25	Bacteria	Proteobacteria	Gammaproteobacteria	free-living	100	37.214	1	1269520	89.85	1299	1299	13
Mpla-MMS-RVI-37	Bacteria	Proteobacteria	Gammaproteobacteria	free-living	100	37.214	1	1269514	93.8	1300	1300	13.5
Mpla-MMS-RVI-51	Bacteria	Proteobacteria	Gammaproteobacteria	free-living	100	37.214	1	1269512	92.9	1299	1299	13
Mpla-MMS-RVI-8	Bacteria	Proteobacteria	Gammaproteobacteria	free-living	100	37.214	1	1269643	92.9	1299	1299	14
Mpla-MMS-RVI-9	Bacteria	Proteobacteria	Gammaproteobacteria	free-living	100	37.214	1	1269646	91.6	1299	1299	13
Mpla-MMS-VB-91	Bacteria	Proteobacteria	Gammaproteobacteria	free-living	100	37.224	1	1302662	88.55	1336	1336	13
Mpla-MMS-RVI-13	Bacteria	Proteobacteria	Gammaproteobacteria	free-living	100	37.228	1	1277720	88.29	1316	1316	13
Mpla-MMS-RIV-30	Bacteria	Proteobacteria	Gammaproteobacteria	free-living	100	37.229	1	1267983	92.63	1296	1296	13
Mpla-MMS-RIV-50	Bacteria	Proteobacteria	Gammaproteobacteria	free-living	100	37.229	1	1267977	88.91	1297	1297	14
Mpla-MMS-RVI-16	Bacteria	Proteobacteria	Gammaproteobacteria	free-living	100	37.229	1	1267981	88.6	1297	1297	13
Mpla-MMS-RIV-28	Bacteria	Proteobacteria	Gammaproteobacteria	free-living	100	37.238	1	1262052	91.93	1293	1293	13
Mpla-MMS-RIV-46	Bacteria	Proteobacteria	Gammaproteobacteria	free-living	100	37.239	1	1262479	87.97	1291	1291	13
Mpla-MMS-RIV-57	Bacteria	Proteobacteria	Gammaproteobacteria	free-living	100	37.239	1	1262480	90.32	1291	1291	13
Mpla-MMS-RIV-48	Bacteria	Proteobacteria	Gammaproteobacteria	free-living	100	37.24	1	1262603	92.5	1291	1291	13
Mpla-MMS-RIV-70	Bacteria	Proteobacteria	Gammaproteobacteria	free-living	100	37.282	1	1276045	89.46	1307	1307	14
Mpla-MMS-VI-126	Bacteria	Proteobacteria	Gammaproteobacteria	free-living	100	37.35	1	1284758	91.94	1326	1326	14
Mpla-MMS-VI-25	Bacteria	Proteobacteria	Gammaproteobacteria	free-living	100	37.374	1	1293107	91.05	1328	1328	14
p-rarus-MT	Bacteria	Proteobacteria	Gammaproteobacteria	free-living	100	39.914	2	3157893	91.52	3049	3049	36
G-sp-HTCC2999	Bacteria	Proteobacteria	Gammaproteobacteria	free-living	100	40.114	11	2560882	91.89	2216	2216	43
p-VK13	Bacteria	Proteobacteria	Gammaproteobacteria	free-living	100	40.968	37	2911239	90.68	2756	2756	34
Pnec-Ma100-1	Bacteria	Proteobacteria	Gammaproteobacteria	free-living	100	42.043	1	1688538	87.61	1712	1712	30
p-VicM1	Bacteria	Proteobacteria	Gammaproteobacteria	free-living	100	43.098	3	1626636	90.93	1627	1627	27
G-punicea-IC056	Bacteria	Proteobacteria	Gammaproteobacteria	free-living	100	43.099	21	3199735	91.34	2847	2847	82
Pnec-Ma5-1	Bacteria	Proteobacteria	Gammaproteobacteria	free-living	100	43.974	1	1854954	92.58	1843	1843	30
p-cosmo-MoIso2	Bacteria	Proteobacteria	Gammaproteobacteria	free-living	100	44.089	6	1775978	92.18	1785	1785	29
Mtur-MMS-10A-171	Bacteria	Proteobacteria	Gammaproteobacteria	free-living	100	44.518	1	1755001	92.08	1735	1735	34
p-RechtKol4	Bacteria	Proteobacteria	Gammaproteobacteria	free-living	100	44.659	1	2382558	92.56	2363	2363	32
p-RechtKolB	Bacteria	Proteobacteria	Gammaproteobacteria	free-living	100	44.69	1	2355392	91.78	2342	2342	32
p-Tro7-1-4	Bacteria	Proteobacteria	Gammaproteobacteria	free-living	100	44.781	12	2227085	92.2	2220	2220	31
p-Tro8-2-9	Bacteria	Proteobacteria	Gammaproteobacteria	free-living	100	44.782	6	2269827	92.81	2254	2254	32
p-Recht1	Bacteria	Proteobacteria	Gammaproteobacteria	free-living	100	44.801	16	2134692	86.98	2126	2126	31
p-Tro8F10W22	Bacteria	Proteobacteria	Gammaproteobacteria	free-living	100	44.813	1	2221607	88.36	2186	2186	31
p-P1-Kol8	Bacteria	Proteobacteria	Gammaproteobacteria	free-living	100	44.823	14	2164281	87.98	2163	2163	32
p-asym-QLW-	Bacteria	Proteobacteria	Gammaproteobacteria	free-living	100	44.834	1	2159490	92.28	2131	2131	31
P1-4-10KL	Bacteria	Proteobacteria	Gammaproteobacteria	free-living	100	44.837	13	2157157	88.09	2144	2144	31
p-wuianus-QLW	Bacteria	Proteobacteria	Gammaproteobacteria	free-living	100	44.943	1	2232205	88.02	2274	2274	28
p-duraquae-MoK4	Bacteria	Proteobacteria	Gammaproteobacteria	free-living	100	45.16	1	2026292	87.54	2060	2060	29
Pr-fontium	Bacteria	Proteobacteria	Gammaproteobacteria	free-living	100	45.23	29	3950845	89.66	3352	3352	91
p-yang-JaK3	Bacteria	Proteobacteria	Gammaproteobacteria	free-living	100	45.426	25	2039354	90.19	2045	2045	31
p-QLW-P1DATA-2	Bacteria	Proteobacteria	Gammaproteobacteria	free-living	100	45.459	15	2172101	93.23	2198	2198	28
p-Tro8-2-5-gr	Bacteria	Proteobacteria	Gammaproteobacteria	free-living	100	45.477	20	2176592	88.18	2168	2168	27
p-sinensis-HuW	Bacteria	Proteobacteria	Gammaproteobacteria	free-living	100	45.502	14	2316512	88.07	2340	2340	32
p-Adler-W8	Bacteria	Proteobacteria	Gammaproteobacteria	free-living	100	45.547	24	2207390	88.25	2236	2236	30
p-nece-STIR1	Bacteria	Proteobacteria	Gammaproteobacteria	free-living	100	45.557	1	1560469	92.42	1911	1911	35
p-sph-Weng1-1	Bacteria	Proteobacteria	Gammaproteobacteria	free-living	100	45.628	17	2042438	87.94	2093	2093	30
Sac-degradans	Bacteria	Proteobacteria	Gammaproteobacteria	free-living	100	45.826	1	5057531	86.66	4141	4141	93
poly-CB	Bacteria	Proteobacteria	Gammaproteobacteria	free-living	100	46.089	1	2045720	93.97	2073	2073	31
C-pealriver	Bacteria	Proteobacteria	Gammaproteobacteria	free-living	100	47.542	2	4427922	88.51	3785	3785	78.5
p-acidi-PGA3	Bacteria	Proteobacteria	Gammaproteobacteria	free-living	100	48.148	1	1851737	89.79	1927	1927	19
C-PSBB023	Bacteria	Proteobacteria	Gammaproteobacteria	free-living	100	49.364	1	4705304	92.61	4032	4032	70
p-dif-AM8B5	Bacteria	Proteobacteria	Gammaproteobacteria	free-living	100	49.506	1	1995529	93.79	2010	2010	28
Meth-MMS-M-34	Bacteria	Proteobacteria	Gammaproteobacteria	free-living	100	49.818	1	2602980	91.92	2429	2429	53
Meth-MMS-M-37	Bacteria	Proteobacteria	Gammaproteobacteria	free-living	100	49.818	1	2602980	85.61	2429	2429	53
Meth-MMS-M-51	Bacteria	Proteobacteria	Gammaproteobacteria	free-living	100	49.818	1	2602980	88.27	2429	2429	53
C-PSBB006	Bacteria	Proteobacteria	Gammaproteobacteria	free-living	100	50.542	1	5257074	89.27	4359	4359	75.5
LimB-MMS178	Bacteria	Proteobacteria	Gammaproteobacteria	free-living	100	51.704	5	2885081	91.24	2781	2781	28
Rhein-F8	Bacteria	Proteobacteria	Gammaproteobacteria	free-living	100	51.738	1	4464611	90.53	3866	3866	68
LimB-Rim11	Bacteria	Proteobacteria	Gammaproteobacteria	free-living	100	52.079	1	2859930	91.94	2761	2761	28
Limnob-MED105	Bacteria	Proteobacteria	Gammaproteobacteria	free-living	100	52.183	46	3390271	89.11	3156	3156	29
Limnob-CACIA	Bacteria	Proteobacteria	Gammaproteobacteria	free-living	100	52.453	108	3217513	91.68	3095	3095	31
K-intermedia	Bacteria	Proteobacteria	Gammaproteobacteria	free-living	100	52.594	109	4640178	92.79	4358	4358	70
G-capsife	Bacteria	Proteobacteria	Gammaproteobacteria	free-living	100	52.755	1	3162471	90.08	2919	2919	33
Gamma-WG36	Bacteria	Proteobacteria	Gammaproteobacteria	free-living	100	52.816	274	5162045	84.99	4777	4777	80
betVI-MMS-14-119	Bacteria	Proteobacteria	Gammaproteobacteria	free-living	100	53.192	18	2161439	86.22	2112	2112	23
LimB-Hippo4	Bacteria	Proteobacteria	Gammaproteobacteria	free-living	100	53.202	18	3133441	86.23	2957	2957	27
Lim-103DPR2	Bacteria	Proteobacteria	Gammaproteobacteria	free-living	100	53.319	1	2948795	90.88	2805	2805	28
Pan-BL1	Bacteria	Proteobacteria	Gammaproteobacteria	free-living	100	53.73	96	5323750	87.41	4950	4950	72
LimA-Jir61	Bacteria	Proteobacteria	Gammaproteobacteria	free-living	100	53.946	8	2626790	87.11	2524	2524	24
H-arsenic	Bacteria	Proteobacteria	Gammaproteobacteria	free-living	100	54.295	1	3424307	90.73	3259	3259	72
Mari-ELB17	Bacteria	Proteobacteria	Gammaproteobacteria	free-living	100	54.337	75	4894744		4680	4680	63
D-sp-2B12	Bacteria	Proteobacteria	Gammaproteobacteria	free-living	100	54.46	64	4345360		3856	3856	90
LimA-Rim8	Bacteria	Proteobacteria	Gammaproteobacteria	free-living	100	55.757	25	2858585		2754	2754	24
LimA-MWH-C5	Bacteria	Proteobacteria	Gammaproteobacteria	free-living	100	55.89	2	3029942		2989	2989	24
LimA-BrazDam-2D	Bacteria	Proteobacteria	Gammaproteobacteria	free-living	100	55.975	1	2619225		2498	2498	22
Sulf-denit	Bacteria	Proteobacteria	Gammaproteobacteria	free-living	100	56.104	1	3130594		2988	2988	43
LimA-B9-3	Bacteria	Proteobacteria	Gammaproteobacteria	free-living	100	56.545	23	3399993		3161	3161	28
LimA-TSCS	Bacteria	Proteobacteria	Gammaproteobacteria	free-living	100	56.573	33	6229309		5821	5821	25
Mari-YWL01	Bacteria	Proteobacteria	Gammaproteobacteria	free-living	100	56.614	151	4538697		4177	4177	48
Sulf-T08	Bacteria	Proteobacteria	Gammaproteobacteria	free-living	100	56.911	77	3418722		3302	3302	44
LimA-JirII-31	Bacteria	Proteobacteria	Gammaproteobacteria	free-living	100	57.805	44	3478868		3318	3318	23
H-autot	Bacteria	Proteobacteria	Gammaproteobacteria	free-living	100	57.948	93	6008109		5361	5361	67
LimA-JirII-29	Bacteria	Proteobacteria	Gammaproteobacteria	free-living	100	58	31	3468110		3332	3332	24
LimC-15K	Bacteria	Proteobacteria	Gammaproteobacteria	free-living	100	58.2	15	3553409		3367	3367	36
LimC-2KL-17	Bacteria	Proteobacteria	Gammaproteobacteria	free-living	100	58.204	111	3500909		3305	3305	39
Mari-P4B1	Bacteria	Proteobacteria	Gammaproteobacteria	free-living	100	58.299	15	3740877		3413	3413	50
A-sp-ANP5	Bacteria	Proteobacteria	Gammaproteobacteria	free-living	100	58.326	91	4775538		4323	4323	85
A-sp-DNP9	Bacteria	Proteobacteria	Gammaproteobacteria	free-living	100	58.494	75	4662933		4236	4236	87
LimC-Rim28	Bacteria	Proteobacteria	Gammaproteobacteria	free-living	100	58.511	55	3402404		3321	3321	36
A-finla-4287D	Bacteria	Proteobacteria	Gammaproteobacteria	free-living	100	58.567	376	4717507		4258	4258	88
A-sp-L-1B5-3	Bacteria	Proteobacteria	Gammaproteobacteria	free-living	100	58.695	148	4830097		4414	4414	81
LimC-2KL-51	Bacteria	Proteobacteria	Gammaproteobacteria	free-living	100	58.7	76	4585454		4252	4252	43
A-veronii	Bacteria	Proteobacteria	Gammaproteobacteria	free-living	100	58.719	1	4551783		4061	4061	89
LimC-2KL-3	Bacteria	Proteobacteria	Gammaproteobacteria	free-living	100	58.92	101	4887877		4441	4441	50
LimC-Rim47	Bacteria	Proteobacteria	Gammaproteobacteria	free-living	100	58.948	1	2955021		2773	2773	43
A-lacus-AE122	Bacteria	Proteobacteria	Gammaproteobacteria	free-living	100	58.962	196	4394373		3935	3935	83
LimC-Jir72	Bacteria	Proteobacteria	Gammaproteobacteria	free-living	100	59.146	45	3686752		3477	3477	41
LimC-WS1	Bacteria	Proteobacteria	Gammaproteobacteria	free-living	100	59.172	48	4604141		4234	4234	47
LimC-II-B4	Bacteria	Proteobacteria	Gammaproteobacteria	free-living	100	59.246	11	2972530		2825	2825	44
D-aromatica-RCB	Bacteria	Proteobacteria	Gammaproteobacteria	free-living	100	59.247	1	4501104		4239	4239	32
LimC-T6-5	Bacteria	Proteobacteria	Gammaproteobacteria	free-living	100	59.325	7	4166903		3655	3655	46
LimC-II-D5	Bacteria	Proteobacteria	Gammaproteobacteria	free-living	100	59.394	152	4873611		4250	4250	58
[truncated: 48 more rows]

[truncated: 7 more sheets: Table_S10, Table_S11, Table_S12, Table_S13, Table_S14, Table_S15, Table_S16]
